# Supplementary material for: Preparation of benzoyl fluorides and benzoic acids from phenols via a dearomatization–rearomatization strategy
Source: Royal Society of Chemistry journal article supplement (doi:10.1039/d3qo00183k), 2023-01-01

## SUPPORTING INFORMATION

### Preparation of Benzoyl Fluorides and Benzoic Acids from Phenols via Dearomatization–Rearomatization Strategy

Meixian Yang,<sup>1†</sup> Xinyue Huang,<sup>3†</sup> Wenjun Miao,<sup>1</sup> Lan Yi,<sup>1</sup> Jiajing Cai,<sup>1</sup> Zhenghuan Zhao,<sup>1</sup> Jia He,<sup>2\*</sup> and Dachuan Qiu<sup>1\*</sup>

<sup>1</sup>College of Basic Medical Sciences, Chongqing Medical University, Chongqing 400016, China

<sup>2</sup>Center for Novel Target and Therapeutic Intervention, Institute of Life Sciences, Chongqing Medical University, Chongqing 400016, China

<sup>3</sup>College of Chemistry and Chemical Engineering, Chongqing University of Technology, Chongqing 400054, China.

\*Correspondence to: [hejia@cqmu.edu.cn](mailto:hejia@cqmu.edu.cn), [102899@cqmu.edu.cn](mailto:102899@cqmu.edu.cn)

**S1.** General Information

**S2.** Preparation of compounds 1

**S3.** Preparation of compounds 3

**S4.** Preparation of compounds 4

**S5.** [<sup>18</sup>O]-Labeling Experiments

**S6.** References

**S7.** NMR Spectra

## General Information

All reagents were obtained from Adamas, Aladin, Accela, or Acros and used without further purification unless otherwise noted. Solvents were not dried prior to use unless specified as “anhydrous.” To prevent moisture, *t*-BuOK was stored and used under inert atmosphere in Glovebox. The products were purified by column chromatography with Huanghai Silica Gel 50-75  $\mu\text{m}$ , ultrapure silica gel.  $^1\text{H}$  and  $^{13}\text{C}$  spectra were recorded in  $\text{CDCl}_3$  (with 0.03%  $\text{Me}_4\text{Si}$ ) or  $\text{DMSO-}d_6$  using a Bruker 600 or 400 spectrometer. Chemical shifts ( $\delta$ ) are reported in ppm downfield from  $\text{Me}_4\text{Si}$  ( $\delta$  0.00 for  $^1\text{H}$  NMR in  $\text{CDCl}_3$ ) or the solvent peak ( $\delta$  7.26 for  $^1\text{H}$  NMR in  $\text{CDCl}_3$ ,  $\delta$  2.50 for  $^1\text{H}$  NMR in  $\text{DMSO-}d_6$ ,  $\delta$  77.23 for  $^{13}\text{C}$  NMR in  $\text{CDCl}_3$ , and  $\delta$  39.52 for  $^{13}\text{C}$  NMR in  $\text{DMSO-}d_6$ ) as an internal reference with coupling constants ( $J$ ) in hertz (Hz). IR spectra were measured on a Shimadzu IRAffinity-1S spectrometer using KBr plates. The high-resolution mass spectra (HRMS) were recorded on Waters SYNAPT G3 spectrometer (ESI).

## Preparation of compounds 1

### General Procedure A for Preparation of Cyclohexadienones:

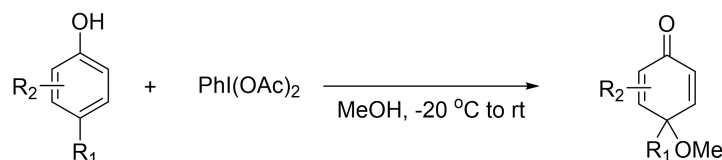

The preparation of cyclohexadienones by phenols dearomatization were accomplished using a known literature procedure.<sup>1</sup> To the solution of phenol (5 mmol) in  $\text{MeOH}$  (20 mL) was added  $\text{PhI}(\text{OAc})_2$  (1.2 equiv) in batches at  $0\text{ }^\circ\text{C}$ , warm to room temperature and stirred until phenol was consumed. The reaction was quenched with sat.  $\text{NaHCO}_3$  (30 mL), and the resulting mixture was extracted with  $\text{DCM}$  (15 mL x3). The combined organic layers was washed with brine (20 mL), dried over  $\text{Na}_2\text{SO}_4$ , filtered, and concentrated in vacuo. The crude product was purified by flash column chromatography to afford the desired cyclohexadienone.

### General Procedure B for Preparation of Cyclohexadienones:

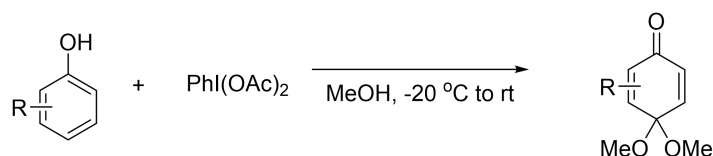

The preparation of cyclohexadienones by phenols dearomatization were accomplished using a known literature procedure.<sup>2</sup> To the solution of phenol (5 mmol) in MeOH (40 mL) was added PhI(OAc)<sub>2</sub> (2.2 equiv) in batches at 0 °C, warm to room temperature and stirred until phenol was consumed. The reaction was quenched with sat. NaHCO<sub>3</sub> (50 mL), and the resulting mixture was extracted with DCM (15 mL x3). The combined organic layers was washed with brine (20 mL), dried over Na<sub>2</sub>SO<sub>4</sub>, filtered, and concentrated in vacuo. The crude product was purified by flash column chromatography to afford the desired cyclohexadienone.

#### General Procedure C for Preparation of Cyclohexadienones:

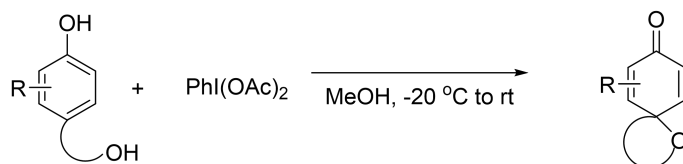

To the solution of phenol (5 mmol) in MeCN (40 mL) was added PhI(OAc)<sub>2</sub> (1.2 equiv) in batches at 0 °C, warmed to room temperature and stirred until phenol was consumed. The reaction was quenched with sat. NaHCO<sub>3</sub> (50 mL), and the resulting mixture was extracted with DCM (15 mL x3). The combined organic layer was washed with brine (20 mL), dried over Na<sub>2</sub>SO<sub>4</sub>, filtered, and concentrated in vacuo. The crude product was purified by flash column chromatography to afford the desired cyclohexadienone.

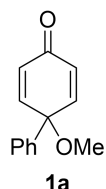

Compound **1a**: Compound **1a** was prepared according to the General Procedure A using commercially available [1,1'-biphenyl]-4-ol (851.1 mg, 5 mmol). The crude product was purified by column chromatography (pet ether: EtOAc = 10:1) to afford 730.8 mg (73%) of compound **1a** as a pale-yellow solid. <sup>1</sup>H NMR (400 MHz, CDCl<sub>3</sub>) δ 7.51-7.42 (m, 2H), 7.40-7.26 (m, 3H), 6.80 (d, *J* = 10.0 Hz, 2H), 6.41 (d, *J* = 10.0 Hz, 2H), 3.43 (s, 3H). Spectroscopic data was agreement with the literature. (*Org. Lett.* **2022**, *24*, 1812-1816)

Compound **1b**: Compound **1b** was prepared according to the General Procedure A using commercially available 4-(pyridin-2-yl)phenol (856.0 mg, 5 mmol).

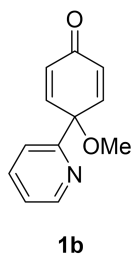

The crude product was purified by column chromatography (pet ether:

EtOAc = 4:1) to afford 492.9 mg (49%) of compound **1b** as a white solid.

Mp: 49-51 °C; <sup>1</sup>H NMR (400 MHz, CDCl<sub>3</sub>) δ 8.53 (d, *J* = 4.8 Hz, 1H),

7.73 (td, *J*<sub>1</sub> = 7.6, *J*<sub>2</sub> = 1.2 Hz, 1H), 7.65 (d, *J* = 7.6 Hz, 1H), 7.26-7.19 (m,

1H), 6.86 (d, *J* = 10.0 Hz, 2H), 6.46 (d, *J* = 10.0 Hz, 2H), 3.41 (s, 3H). ppm; <sup>13</sup>C NMR

(100 MHz, CDCl<sub>3</sub>) δ 185.7, 158.8, 149.5, 149.0, 137.5, 131.4, 123.6, 121.3, 77.6, 53.0

ppm; IR (thin film) 1663, 1591, 1460, 1433, 1385, 1350, 1277, 1099, 1075, 857, 716

(cm<sup>-1</sup>); HRMSMALDI (*m/z*) calcd for [C<sub>12</sub>H<sub>11</sub>NNaO<sub>2</sub>]<sup>+</sup>, 224.0682; found, 224.0692.

Compound **1c**: Compound **1c** was prepared according to the General Procedure A

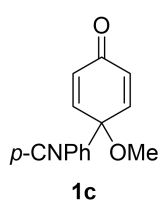

using 4'-hydroxy-[1,1'-biphenyl]-4-carbonitrile (976.0 mg, 5 mmol). The

crude product was purified by column chromatography (pet ether: DCM

= 1:2) to afford 843.8 mg (75%) of compound **1c** as a pale-yellow solid.

Mp: 84-86 °C; <sup>1</sup>H NMR (400 MHz, CDCl<sub>3</sub>) δ 7.62 (d, *J* = 8.8 Hz, 2H),

7.56 (d, *J* = 8.8 Hz, 2H), 6.70 (d, *J* = 10.4 Hz, 2H), 6.43 (d, *J* = 10.4 Hz, 2H), 3.41 (s,

3H) ppm; <sup>13</sup>C NMR (100 MHz, CDCl<sub>3</sub>) δ 185.0, 149.2, 143.8, 132.7, 131.1, 126.8,

118.5, 112.4, 76.4, 53.1 ppm; IR (thin film) 1660, 1631, 1603, 1388, 1351, 1277,

1166, 1080, 1015, 944, 850, 768 (cm<sup>-1</sup>); HRMSMALDI (*m/z*) calcd for

[C<sub>14</sub>H<sub>11</sub>NNaO<sub>2</sub>]<sup>+</sup>, 248.0682; found, 248.0690.

Compound **1d**: Compound **1d** was prepared according to the General

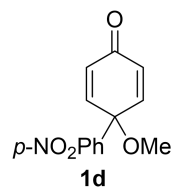

Procedure A using 4'-nitro-[1,1'-biphenyl]-4-ol (1.07 g, 5 mmol). The

crude product was purified by column chromatography (pet ether:

EtOAc = 10:1) to afford 797.0 mg (65%) of compound **1d** as a

pale-yellow solid. Mp: 82-84 °C; <sup>1</sup>H NMR (400 MHz, CDCl<sub>3</sub>) δ 8.19 (d, *J* = 8.8 Hz,

2H), 7.64 (d, *J* = 8.8 Hz, 2H), 6.72 (d, *J* = 9.6 Hz, 2H), 6.47 (d, *J* = 9.6 Hz, 2H), 3.44

(s, 3H) ppm; <sup>13</sup>C NMR (100 MHz, CDCl<sub>3</sub>) δ 185.0, 149.1, 147.9, 145.8, 131.2, 127.1,

124.0, 76.5, 53.2 ppm; IR (thin film) 1599, 1519, 1384, 1352, 1276, 1178, 1076, 1013,

950, 852, 747 (cm<sup>-1</sup>); HRMSMALDI (m/z) calcd for [C<sub>13</sub>H<sub>11</sub>NNaO<sub>4</sub>]<sup>+</sup>, 268.0580; found, 268.0584.

Compound **1e**: Compound **1e** was prepared according to the literature procedure.<sup>4</sup> To

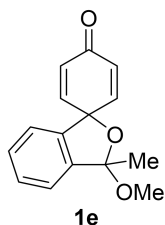

a solution of *o*-bromoacetophenone (1.59 g, 8 mmol) in MeOH (20 mL) were added CH(OMe)<sub>3</sub> (1.37 mL, 12.0 mmol, 1.5 equiv) and *p*-TsOH (50 mg, 0.29 mmol, 3.6%). Stirred overnight, the reaction mixture was neutralized with 1% KOH solution in MeOH (4 mL), concentrated, and purified by column chromatography (pet ether: EtOAc = 10:1) to afford compound **S1** as colorless oil (1.92 g, 98%).

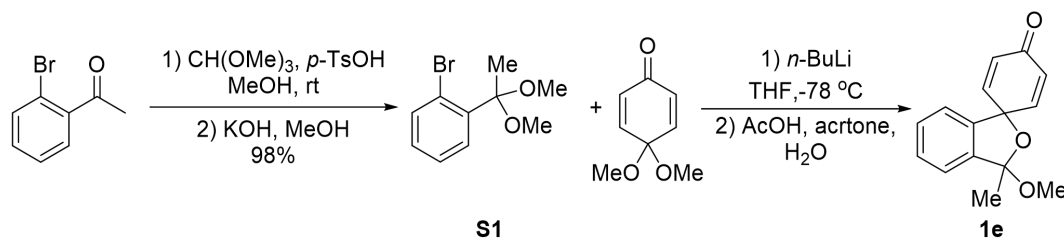

To a solution of **S1** (1.23 g, 5.0 mmol) in THF (20 mL) at -78 °C was added dropwise *n*-BuLi (1.6 M in hexane, 4.1 mL, 6.5 mmol, 1.3 equiv) over 10 min, and the solution was stirred at -78 °C for 2 h. To the mixture was added dropwise 4,4-dimethoxy-2,5-cyclohexadienone (847.9 mg, 5.5 mmol, 1.1 equiv) in THF (5.0 mL) over 10 min, stirred at -78 °C for 1 h and warmed to room temperature. The reaction was quenched with saturated aqueous NH<sub>4</sub>Cl (5.0 mL) and extracted with Et<sub>2</sub>O (60 mL). The combined organic layer was concentrated in vacuo giving the crude quinol ketal. The crude product was dissolved in acetone (30 mL), 8% aqueous AcOH (6 mL) was added, and the solution was stored at 0 °C for 24 h. After concentration in vacuo, the resulting mixture was extracted with DCM (15 mL x3). The combined organic layer was washed with brine (20 mL), dried over Na<sub>2</sub>SO<sub>4</sub>, filtered, and concentrated in vacuo. The crude product was purified by flash column chromatography to afford **1e** (629.9 mg, 52%) as a white solid. <sup>1</sup>H NMR (600 MHz, CDCl<sub>3</sub>) δ 7.44-7.35 (m, 3H), 7.03 (d, *J* = 6.6 Hz, 1H), 6.92-6.89 (m, 1H), 6.70-6.66 (m, 1H), 6.25 (d, *J* = 10.2 Hz, 2H), 3.25 (s, 3H), 1.83 (s, 3H) ppm. Spectroscopic data was agreement with the literature. (*J. Org. Chem.* **1989**, *54* (22), 5364-5371)

Compound **1f**: Compound **1f** was prepared according to the General Procedure A using 4-isopropylphenol (681.0 mg, 5 mmol). The crude product was purified by column chromatography (pet ether: DCM = 1:3) to afford 257.7 mg (31%) of compound **1f** as a pale-yellow oil. <sup>1</sup>H NMR (600 MHz, CDCl<sub>3</sub>) δ 6.72 (d, *J* = 10.2 Hz, 2H), 6.41 (d, *J* = 10.2 Hz, 2H), 3.21 (s, 3H), 2.01-1.94 (m, 1H), 0.93 (d, *J* = 7.2 Hz, 6H) ppm. Spectroscopic data was agreement with the literature. (*RSC Adv.* **2015**, *5*, 38499-38502)

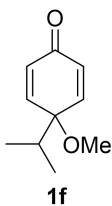

Compound **1g**: Compound **1g** was prepared according to the General Procedure A using *p*-cresol (540.7 mg, 5 mmol). The crude product was purified by column chromatography (pet ether: EtOAc = 10:1) to afford 573.4 mg (83%) of compound **1g** as a pale-yellow solid. <sup>1</sup>H NMR (600 MHz, CDCl<sub>3</sub>) δ 6.77-6.71 (m, 2H), 6.32-6.22 (m, 2H), 3.18 (s, 3H), 1.41 (s, 3H) ppm. Spectroscopic data was agreement with the literature. (*Org. Lett.* **2022**, *24*, 1812-1816)

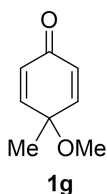

Compound **1h**: Compound **1h** was prepared according to the General Procedure A using 4-(*tert*-butyl)phenol (751.1 mg, 5 mmol). The crude product was purified by column chromatography (pet ether: EtOAc = 10:1) to afford 414.3 mg (46%) of compound **1h** as a pale-yellow solid. <sup>1</sup>H NMR (600 MHz, CDCl<sub>3</sub>) δ 6.87 (d, *J* = 10.2 Hz, 2H), 6.40 (d, *J* = 10.2 Hz, 2H), 3.19 (s, 3H), 1.00 (s, 9H). Spectroscopic data was agreement with the literature. (*RSC Adv.* **2015**, *5*, 38499-38502)

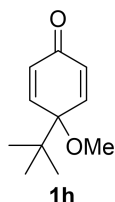

Compound **1i**: Compound **1i** was prepared according to the General Procedure A using 4-methoxyphenol (620.7 g, 5 mmol). The crude product was purified by column chromatography (pet ether: EtOAc = 10:1) to afford 701.5 mg (91%) of compound **1i** as a pale-yellow oil. <sup>1</sup>H NMR (400 MHz, CDCl<sub>3</sub>) δ 6.80 (d, *J* = 10.4 Hz, 2H), 6.24 (d, *J* = 10.4 Hz, 2H), 3.34 (s,

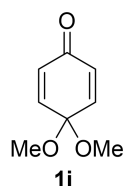

6H). Spectroscopic data was agreement with the literature. (*Org. Lett.* **2018**, *20*, 668-671)

Compound **1j**: Compound **1j** was prepared according to the General Procedure A

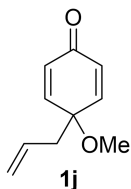

using 4-allylphenol (670.9 g, 5 mmol). The crude product was purified by column chromatography (pet ether: EtOAc = 10:1) to afford 262.7 mg (32%) of compound **1j** as a yellow oil. <sup>1</sup>H NMR (600 MHz, CDCl<sub>3</sub>) δ 6.75-6.71 (m, 2H), 6.37-6.32 (m, 2H), 5.73-5.65 (m, 1H), 5.12-5.04 (m, 2H), 3.22 (s, 3H), 2.47 (d, *J* = 7.8 Hz, 2H) ppm. Spectroscopic data was agreement with the literature. (*RSC Adv.* **2015**, *5*, 38499-38502)

Compound **1k**: Compound **1k** was prepared according to the literature procedure.<sup>3</sup>

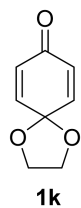

Added the mixture of 4-methoxyphenol (620.7 mg, 5 mmol, 1.0 equiv) and ethane-1,2-diol (3.1 g, 50 mmol, 10 equiv) in anhydrous DCM (10 mL) to the solution of [Bis(trifluoroacetoxy)iodo]benzene (670.9 g, 5.5 mmol, 1.1 equiv) in anhydrous DCM (10 mL) at 0 °C, then warmed up to room temperature.

The reaction was quenched with sat. NaHCO<sub>3</sub> (50 mL), and the resulting mixture was extracted with DCM (15 mL x3). The combined organic layer was washed with brine (20 mL), dried over Na<sub>2</sub>SO<sub>4</sub>, filtered, and concentrated in vacuo. The crude product was purified by flash column chromatography (pet ether: EtOAc = 10:1) to afford 654.2 mg (86%) of compound **1k** as a pale-yellow solid. <sup>1</sup>H NMR (400 MHz, CDCl<sub>3</sub>) δ 6.62 (d, *J* = 10.0 Hz, 2H), 6.16 (d, *J* = 10.0 Hz, 2H), 4.14 (s, 4H). Spectroscopic data was agreement with the literature. (*Org. Lett.* **2012**, *14*, 696-699)

Compound **1l**: Compound **1l** was prepared according to the General Procedure A

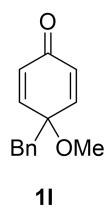

using 4-benzylphenol (921.0 mg, 5 mmol). The crude product was purified by column chromatography (pet ether: DCM = 2:1) to afford 492.9 mg (46%) of compound **1l** as a pale-yellow oil. <sup>1</sup>H NMR (400 MHz, CDCl<sub>3</sub>) δ 7.28-7.20 (m, 3H), 7.18-7.11 (m, 2H), 6.73 (d, *J* = 10.4 Hz, 2H), 6.29 (d, *J* = 10.4 Hz, 2H), 3.20 (s, 3H), 3.00 (s, 2H) ppm. Spectroscopic data was agreement with

the literature. (*Org. Lett.* **2022**, *24*, 1812-1816)

Compound **1m**: To a solution of ethynylbenzene (1.0 mL, 11.7 mmol) in THF (25 mL)

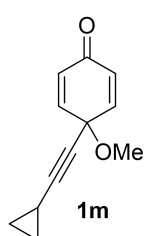

was added *n*-BuLi (1.6 M in hexane, 6.8 mL, 10.8 mmol) at -78 °C. After stirring for 1 h at the same temperature, benzoquinone (973 mg, 9.0 mol) was added, the resulting mixture was stirred at -78 °C for 3 h. After the starting material was consumed, the mixture was quenched with saturated

NH<sub>4</sub>Cl solution, extracted with ethyl acetate, washed with brine and dried over anhydrous Na<sub>2</sub>SO<sub>4</sub>. The solvent was evaporated under the reduced pressure and the residue was purified by column chromatography on silica gel (pet ether: EtOAc = 6:1) to afford **S2** (1.49 g, 95% yield) as a colorless oil. <sup>1</sup>H NMR (600 MHz, CDCl<sub>3</sub>) δ 6.86 (d, *J* = 9.6 Hz, 2H), 6.13 (d, *J* = 10.2 Hz, 2H), 3.70 (s, 1H), 1.28-1.24 (m, 1H), 0.84-0.79 (m, 2H), 0.73-0.71 (m, 2H) ppm. Spectroscopic data was agreement with the literature. (*Org. Lett.* **2015**, *17*, 5926-5929)

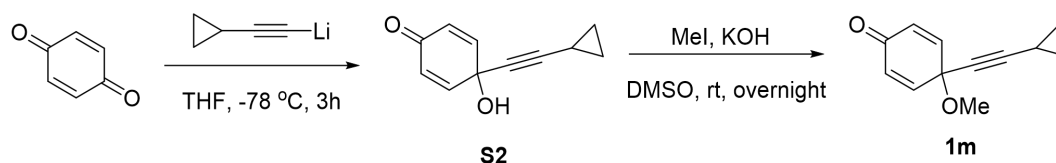

To a solution of **S2**(1.49 g, 8.55 mmol) in DMSO (15 mL) was added MeI (1.82g, 12.83 mmol, 1.5 equiv) and KOH (719.8 mg, 12.83 mmol, 1.5 equiv) under room temperature. Stirred overnight, the reaction mixture was neutralized with diluted hydrochloric acid, the organic phase was separated and the aqueous phase was extracted with EtOAc (30 mL x 3). Then the combined organic phases were washed with brine and dried over Na<sub>2</sub>SO<sub>4</sub> and concentrated. Flash column chromatography (pet ether: EtOAc = 5: 1) afforded 743 mg (46%) of compound **1m** as white solid. Mp: 39-41 °C; <sup>1</sup>H NMR (400 MHz, CDCl<sub>3</sub>) δ 6.77 (d, *J* = 10.0 Hz, 2H), 6.23 (d, *J* = 10.0 Hz, 2H), 3.28 (s, 3H), 1.30 - 1.18 (m, 1H), 0.84 - 0.76 (m, 2H), 0.74 - 0.68 (m, 2H) ppm; <sup>13</sup>C NMR (100 MHz, CDCl<sub>3</sub>) δ 184.9, 145.9, 128.9, 91.7, 69.9, 67.8, 52.2, 8.7, -0.4 ppm; IR (thin film) 1670, 1630, 1605, 1463, 1390, 1351, 1235, 1165, 1091, 1050,



931, 914, 871 (cm<sup>-1</sup>); HRMSMALDI (m/z) calcd for [C<sub>12</sub>H<sub>12</sub>NaO<sub>2</sub>]<sup>+</sup>, 211.0730; found, 211.0740.

**Compound 1n:** Compound **1n** was prepared according to the General Procedure A

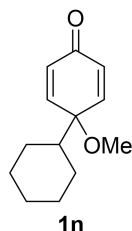

using 4-cyclohexylphenol (881.3 mg, 5 mmol). The crude product was purified by column chromatography (pet ether: EtOAc = 10:1) to afford 546.7 mg (53%) of compound **1n** as a pale-yellow solid. <sup>1</sup>H NMR (600 MHz, CDCl<sub>3</sub>) δ 6.74-6.71 (m, 2H), 6.40-6.36 (m, 2H), 3.20 (s, 3H), 1.89-1.85 (m, 2H), 1.78-1.73 (m, 2H), 1.68-1.62 (m, 2H), 1.23-1.16 (m, 2H), 1.12-1.04 (m, 1H), 0.96-0.89 (m, 2H) ppm. Spectroscopic data was agreement with the literature. (*RSC Adv.* **2015**, 5, 38499-38502)

**Compound 1o:** Compound **1o** was prepared according to the General Procedure B

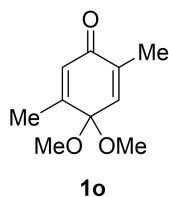

using 2,5-dimethylphenol (610.9 mg, 5 mmol). The crude product was purified by column chromatography (pet ether: EtOAc = 15:1) to afford 555.8 mg (61%) of compound **1o** as a white solid. Mp: 53-55 °C;

<sup>1</sup>H NMR (400 MHz, CDCl<sub>3</sub>) δ 6.47 (s, 1H), 6.17 (s, 1H), 3.16 (s, 6H), 1.90 (s, 3H), 1.87 (s, 3H) ppm; <sup>13</sup>C NMR (100 MHz, CDCl<sub>3</sub>) δ 185.8, 155.9, 139.6, 139.2, 123.0, 96.1, 51.0, 16.4, 15.5 ppm; IR (thin film) 1684, 1640, 1454, 1392, 1370, 1271, 1239, 1205, 1160, 1118, 1081, 1054, 959, 742 (cm<sup>-1</sup>); HRMSMALDI (m/z) calcd for [C<sub>10</sub>H<sub>14</sub>NaO<sub>3</sub>]<sup>+</sup>, 205.0835; found, 205.0839.

**Compound 1p:** Compound **1p** was prepared according to the General Procedure A

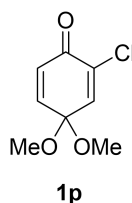

using 2-chloro-4-methoxyphenol (792.9 mg, 5 mmol). The crude product was purified by column chromatography (pet ether: EtOAc = 15:1) to afford 867.6 mg (92%) of compound **1p** as a pale-yellow oil. <sup>1</sup>H NMR (400 MHz, CDCl<sub>3</sub>) δ 7.02 (s, 1H), 6.86 (d, *J* = 10.4 Hz, 1H), 6.36 (d, *J* = 10.4 Hz, 1H), 3.39 (s, 6H) ppm. Spectroscopic data was agreement with the literature.

(*Chem. Sci.*, **2011**, 2, 1086-1089)

Compound **1q**: Compound **1q** was prepared according to the General Procedure B using 3-iodophenol (1.10 g, 5 mmol). The crude product was purified by column chromatography (pet ether: EtOAc = 10:1) to afford 756.0 mg (54%) of compound **1q** as a pale-yellow solid. <sup>1</sup>H NMR (400 MHz, CDCl<sub>3</sub>) δ 7.23 (d, *J* = 2.0 Hz, 1H), 6.96 (d, *J* = 10.0 Hz, 1H), 6.52 (dd, *J*<sub>1</sub> = 10.0, *J*<sub>2</sub> = 2.0 Hz, 1H), 3.26 (s, 6H). Spectroscopic data was agreement with the literature. (*Eur. J. Org. Chem.* **2016**, 3809–3816)

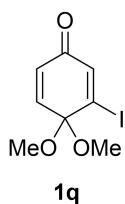

Compound **1r**: Compound **1r** was prepared according to the General Procedure B using 3-bromophenol (865.0 mg, 5 mmol). The crude product was purified by column chromatography (pet ether: EtOAc = 15:1) to afford 862.3 mg (74%) of compound **1r** as a pale-yellow oil. <sup>1</sup>H NMR (400 MHz, CDCl<sub>3</sub>) δ 6.91-6.83 (m, 2H), 6.49 (dd, *J*<sub>1</sub> = 10.0, *J*<sub>2</sub> = 2.0 Hz, 1H), 3.30 (s, 6H). Spectroscopic data was agreement with the literature. (*Eur. J. Org. Chem.* **2016**, 3809–3816)

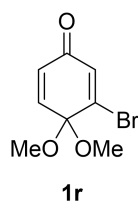

Compound **1s**: Compound **1s** was prepared according to the General Procedure A using 5,6,7,8-tetrahydronaphthalen-2-ol (1.48 g, 5 mmol). The crude product was purified by column chromatography (pet ether: EtOAc = 10:1) to afford 427.8 mg (48%) of compound **1s** as a pale-yellow solid. <sup>1</sup>H NMR (400 MHz, CDCl<sub>3</sub>) δ 6.64 (dd, *J*<sub>1</sub> = 10.0, *J*<sub>2</sub> = 2.0 Hz, 1H), 6.30 (dt, *J*<sub>1</sub> = 10.0, *J*<sub>2</sub> = 2.0 Hz, 1H), 6.18 (d, *J* = 2.0 Hz, 1H), 3.03 (s, 3H), 2.44-2.27 (m, 2H), 2.14-2.06 (m, 1H), 2.03-1.82 (m, 2H), 1.62-1.54 (m, 1H), 1.42-1.25 (m, 2H). Spectroscopic data was agreement with the literature. (*Org. Lett.* **2018**, 20, 696-699)

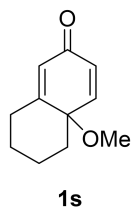

Compound **1t**: Compound **1t** was prepared according to the General Procedure A using 4-methylnaphthalen-1-ol (741.0 mg, 5 mmol). The crude product was purified by column chromatography (pet ether: EtOAc = 10:1) to afford 715.3 mg (76%) of compound **1t** as a pale-yellow solid. <sup>1</sup>H NMR (400 MHz, CDCl<sub>3</sub>) δ 8.12 (d, *J* = 7.6 Hz, 1H), 7.63 (d, *J* = 4.4 Hz, 2H),

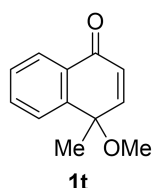

7.50-7.39 (m, 1H), 6.92 (d,  $J = 10.4$  Hz, 1H), 6.49 (d,  $J = 10.4$  Hz, 1H), 3.00 (s, 3H), 1.59 (s, 3H). Spectroscopic data was agreement with the literature. (*Adv. Synth. Catal.* **2016**, 358, 3683-3687)

Compound **1u**: Compound **1u** was prepared according to the General Procedure C

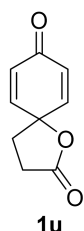

using 3-(4-hydroxyphenyl)propanoic acid (830.9 mg, 5 mmol). The crude product was purified by column chromatography (pet ether: EtOAc = 10:1) to afford 689.5 mg (84%) of compound **1u** as a white solid.  $^1\text{H}$  NMR (400 MHz,  $\text{CDCl}_3$ )  $\delta$  6.85 (d,  $J = 10.0$  Hz, 2H), 6.26 (d,  $J = 10.0$  Hz, 2H), 2.81-2.72 (m, 2H), 2.36 (t,  $J = 8.4$  Hz, 2H). Spectroscopic data was agreement with the literature. (*Angew. Chem., Int. Ed.* **2019**, 58, 9811-9815)

Compound **1v**: Compound **1v** was prepared according to the literature procedure.<sup>5</sup>

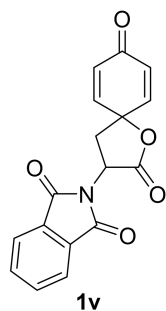

To the mixture of DL-Tyrosine (1.81 g, 10 mmol, 1 equiv), phthalic anhydride (1.48 g, 10 mmol, 1 equiv) in glacial acetic acid (20 mL) was added pyridine until the mixture substances were solved totally. Stirred overnight, warmed up to 100 °C and stirred for another 5h. Then removed the solvent under reduced pressure and cooled the mixture, poured the mixture onto crushed ice, collected the precipitate

by filtration and recrystallized to afford **S3**.

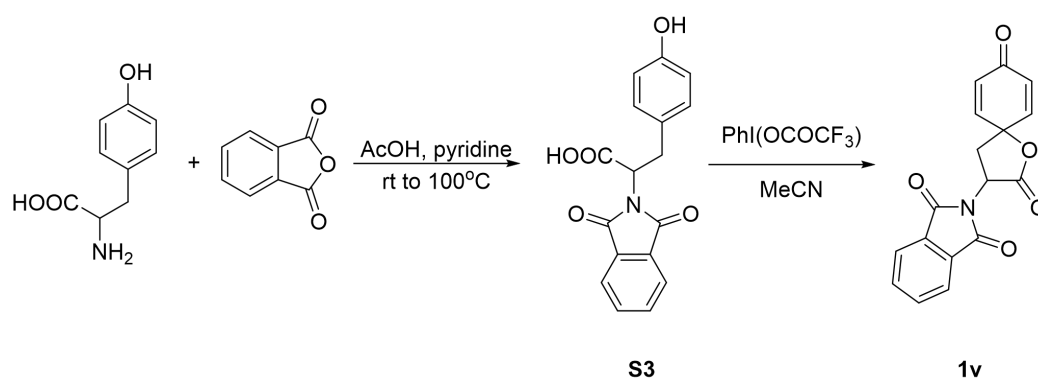

To the solution of **S3** (1.56 g, 5 mmol, 1.0 equiv) in MeCN (20 mL) and pyridine (20 mL) was added  $\text{PhI}(\text{OCOCF}_3)_2$  (2.58 g, 6 mmol, 1.2 equiv) in batches at 0 °C, warm to room temperature and stirred until phenol was consumed. The reaction was



filtered, and concentrated in vacuo. The crude product was purified by column chromatography (pet ether: EtOAc = 4:1) to afford 2.99 g (81%) of compound **S5** as a white solid.

A mixture of **S5** (1.48 g, 4 mmol, 1.0 equiv) and NIS (2.70 g, 12 mmol, 3 equiv.) in 1,2-dichloroethane (20 mL) in pressure tube (purged with Ar) was heated at 110 °C for 10 hours. The reaction mixture was cooled to room temperature, diluted with 50 mL dichloromethane and treated with saturated aqueous Na<sub>2</sub>S<sub>2</sub>O<sub>3</sub> solution. The mixture was extracted with dichloromethane (20 mL x3), and the combined organic layer was washed with brine (30 mL), dried over Na<sub>2</sub>SO<sub>4</sub>, filtered, and concentrated in vacuo. The crude product was purified by column chromatography (pet ether: EtOAc = 1:1) to afford 790.3 mg (78%) of compound **1w** as a pale-yellow solid. <sup>1</sup>H NMR (400 MHz, CDCl<sub>3</sub>) δ 7.25-7.12 (m, 5H), 6.60-6.48 (m, 2H), 6.20-6.03 (m, 2H), 4.29 (s, 2H), 2.72-2.58 (m, 2H), 2.17-2.07 (m, 2H) ppm. Spectroscopic data was agreement with the literature. (*Org. Biomol. Chem.* **2019**, *17*, 6762-6770)

Compound **1x**: Compound **1x** was prepared according to the General Procedure A

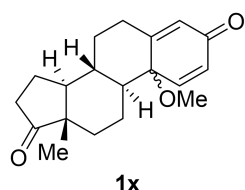

using 1,3,5(10)-Estratrien-3-ol-17-one (1.35 g, 5 mmol). The crude product was purified by column chromatography (pet ether: EtOAc = 10:1) to afford 811.1 mg (55%) of compound **1x** as a pale-yellow foam, which is a 6.7:1 mixture of diastereoisomers.

<sup>1</sup>H NMR (600 MHz, CDCl<sub>3</sub>) δ 6.96 (d, *J* = 10.4 Hz, 1H), 6.83 (d, *J* = 10.4 Hz, 0.15H), 6.35 (d, *J* = 10.4 Hz, 1H), 6.31 (d, *J* = 10.4 Hz, 0.15H), 6.23 (s, 0.15H), 6.17 (s, 1H), 3.05 (s, 3.45H), 2.52-1.05 (m, 17.25H), 0.94 (s, 3H), 0.77 (s, 0.45H) ppm; HRMSMALDI (*m/z*) calcd for [C<sub>19</sub>H<sub>25</sub>NO<sub>3</sub>]<sup>+</sup>, 301.1798; found, 301.1801.

Compound **<sup>18</sup>O-1a**: To the mixture of [1,1'-biphenyl]-4-ol (255.0 mg, 1.5 mmol),

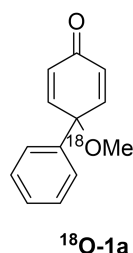

MeCN (3 mL), and H<sub>2</sub><sup>18</sup>O (1 mL) was added PhI(OAc)<sub>2</sub> (1.5 equiv) in batches at 0 °C, warmed to room temperature and stirred until phenol was consumed. The reaction was quenched with sat. NaHCO<sub>3</sub> (10 mL), and the resulting mixture was extracted with DCM (10 mL x3). The combined

organic layers was washed with brine (20 mL), dried over Na<sub>2</sub>SO<sub>4</sub>, filtered, and concentrated in vacuo. The crude product was purified by flash column chromatography to afford 101.6 mg (36%) of compound **S6**.

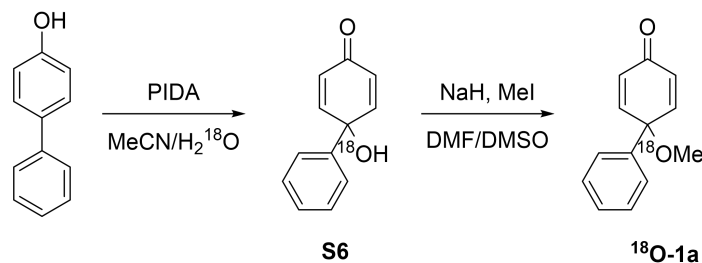

The solution of **S6** (101.6 mg, 0.54 mmol) in anhydrous DMF (5.0 mL) was cooled to -78 °C under inert atmosphere, added NaH (60%, 32.4 mg, 0.81 mmol, 1.5 equiv) to the mixture and stirred 20 mins. Then added anhydrous DMSO (0.5 mL) and MeI (0.81 mmol, 1.5 equiv) to the mixture at -78 °C, warmed to room temperature and stirred over night. The reaction was quenched with sat. NaHCO<sub>3</sub> (10 mL), and the resulting mixture was extracted with DCM (10 mL x3). The combined organic layers was washed with brine (20 mL), dried over Na<sub>2</sub>SO<sub>4</sub>, filtered, and concentrated in vacuo. The crude product was purified by flash column chromatography to afford 86.3 mg (79%) of compound **<sup>18</sup>O-1a**. Both **S6** and **<sup>18</sup>O-1a** were confirmed by MS.

### Preparation of compounds 3

#### General Procedure D for Preparation of Benzoyl Fluorides:

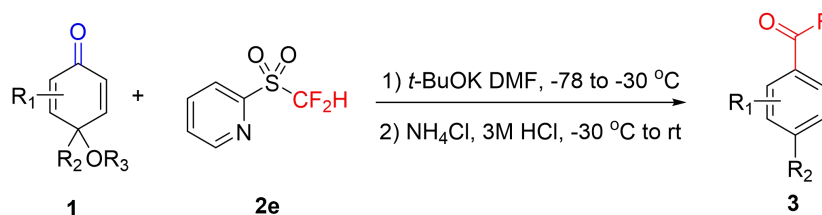

To the mixture of cyclohexadienones **1** (1.2 mmol, 1.2 equiv) and 2-((difluoromethyl)sulfonyl)pyridine **2e** (1.0 mmol, 1.0 equiv) in anhydrous DMF (5.0 mL) under inert atmosphere was added the solution of *t*-BuOK (1.3 mmol, 1.3 equiv) in anhydrous DMF (2.0 mL) slowly at -78 °C, then warmed up to -30 °C slowly. The reaction was quenched with sat. NH<sub>4</sub>Cl (5 mL) and 3M HCl (5 mL) at -30 °C, warmed up to room temperature and extracted with Et<sub>2</sub>O (10 x3), the

combined organic phase was washed with brine, dried over anhydrous  $\text{Na}_2\text{SO}_4$ , filtered and concentrated in vacuo. Flash column chromatography afforded product **3**.

Compound **3a**: Compound **3a** was prepared according to the General Procedure D.

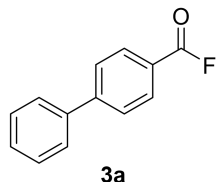

**3a**

The crude product was purified by column chromatography (pet ether: DCM = 8:1) to afford 162.2 mg (81%) of compound **3a** as a white solid.  $^1\text{H}$  NMR (600 MHz,  $\text{CDCl}_3$ )  $\delta$  8.12 (d,  $J = 8.4$  Hz, 2H), 7.74 (d,  $J = 8.4$  Hz, 2H), 7.67-7.63 (m, 2H), 7.51 (t,  $J = 7.2$  Hz, 2H), 7.45 (t,  $J = 7.2$  Hz, 1H) ppm;  $^{13}\text{C}$  NMR (150 MHz,  $\text{CDCl}_3$ )  $\delta$  157.6 (d,  $J = 341.3$  Hz), 148.3, 139.4, 132.2 (d,  $J = 3.8$  Hz), 129.3, 129.0, 127.8, 127.5, 123.7 (d,  $J = 61.1$  Hz) ppm;  $^{19}\text{F}$  NMR (376 MHz,  $\text{CDCl}_3$ )  $\delta$  18.13 (s, 1F) ppm. Spectroscopic data was agreement with the literature. (*Org. Lett.* **2021**, 23, 847-852)

Compound **3c**: Compound **3c** was prepared according to the General Procedure D.

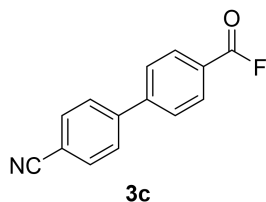

**3c**

The crude product was purified by column chromatography (pet ether: DCM = 1:1) to afford 168.9 mg (75%) of compound **3c** as a white solid. Mp: 153-155 °C;  $^1\text{H}$  NMR (600 MHz,  $\text{CDCl}_3$ )  $\delta$  8.16 (d,  $J = 7.8$  Hz, 2H), 7.79 (d,  $J = 8.4$  Hz, 2H), 7.76-7.69 (m, 4H) ppm;  $^{13}\text{C}$  NMR (150 MHz,  $\text{CDCl}_3$ )  $\delta$  157.1 (d,  $J = 341.9$  Hz), 146.1, 143.8, 133.1, 132.4 (d,  $J = 3.8$  Hz), 128.3, 128.1, 125.1 (d,  $J = 61.5$  Hz), 118.6, 112.7 ppm;  $^{19}\text{F}$  NMR (376 MHz,  $\text{CDCl}_3$ )  $\delta$  18.80 (s, 1F) ppm; IR (thin film) 1803, 1598, 1352, 1257, 1182, 1127, 1040, 995, 865, 827, 765 ( $\text{cm}^{-1}$ ); HRMS-MALDI ( $m/z$ ) calcd for  $[\text{C}_{14}\text{H}_9\text{FNO}]^+$ , 226.0663; found, 226.0670.

Compound **3d**: Compound **3d** was prepared according to the General Procedure D.

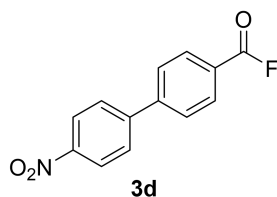

**3d**

The crude product was purified by column chromatography (pet ether: DCM = 2:1) to afford 181.4 mg (74%) of compound **3d** as a white solid. Mp: 194-196 °C;  $^1\text{H}$  NMR (600 MHz,  $\text{CDCl}_3$ )  $\delta$  8.35 (d,  $J = 9.0$  Hz, 2H), 8.17 (d,  $J = 8.4$  Hz, 2H), 7.81-7.76 (m, 4H) ppm;  $^{13}\text{C}$  NMR (150 MHz,  $\text{CDCl}_3$ )  $\delta$  157.1 (d,  $J = 342.0$  Hz),

148.2, 145.7, 145.6, 132.4 (d,  $J = 3.6$  Hz), 128.5, 128.3, 125.3 (d,  $J = 61.7$  Hz), 124.6 ppm;  $^{19}\text{F}$  NMR (376 MHz,  $\text{CDCl}_3$ )  $\delta$  18.90 (s, 1F) ppm; IR (thin film) 1804, 1604, 1517, 1388, 1345, 1259, 1108, 1034, 1001, 855, 840, 741 ( $\text{cm}^{-1}$ ); HRMS-MALDI (m/z) calcd for  $[\text{C}_{13}\text{H}_8\text{FKNO}_3]^+$ , 284.0120; found, 284.0119.

Compound **3e**: Compound **3e** was prepared according to the General Procedure D.

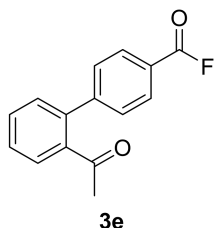

The crude product was purified by column chromatography (pet ether: EtOAc = 10:1) to afford 196.2 mg (81%) of compound **3e** as a white solid. Mp: 79-81 °C;  $^1\text{H}$  NMR (400 MHz,  $\text{CDCl}_3$ )  $\delta$  8.09 (d,  $J = 7.6$  Hz, 2H), 7.66 (dd,  $J_1 = 7.6$ ,  $J_2 = 1.2$  Hz, 1H), 7.57 (td,  $J_1 = 7.6$ ,  $J_2 = 1.2$  Hz, 1H), 7.54-7.44 (m, 3H), 7.37 (dd,  $J_1 = 7.6$ ,  $J_2 = 1.2$  Hz, 1H), 2.22 (s, 3H) ppm;  $^{13}\text{C}$  NMR (100 MHz,  $\text{CDCl}_3$ )  $\delta$  202.9, 157.3 (d,  $J = 341.6$  Hz), 148.6, 140.1, 139.3, 131.8, 131.7, 131.4, 130.6, 129.7, 128.7 (d,  $J = 5.5$  Hz), 124.2 (d,  $J = 61.3$  Hz), 30.4 ppm;  $^{19}\text{F}$  NMR (376 MHz,  $\text{CDCl}_3$ )  $\delta$  18.43 (s, 1F) ppm; IR (thin film) 1808, 1681, 1603, 1353, 1246, 1183, 1034, 1006, 956, 762, 696, 597 ( $\text{cm}^{-1}$ ); HRMS-MALDI (m/z) calcd for  $[\text{C}_{15}\text{H}_{11}\text{FNaO}_2]^+$ , 265.0635; found, 265.0634.

Compound **3f**: Compound **3f** was prepared according to the General Procedure D. The

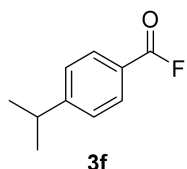

crude product was purified by column chromatography (pet ether: DCM = 8:1) to afford 121.3 mg (73%) of compound **3f** as a colorless oil.  $^1\text{H}$  NMR (400 MHz,  $\text{CDCl}_3$ )  $\delta$  7.96 (d,  $J = 8.0$  Hz, 2H), 7.37 (d,  $J = 8.0$  Hz, 2H), 3.00 (hept,  $J = 6.8$  Hz, 1H), 1.29 (d,  $J = 6.8$  Hz, 6H) ppm;  $^{13}\text{C}$  NMR (100 MHz,  $\text{CDCl}_3$ )  $\delta$  157.6 (d,  $J = 340.7$  Hz), 157.4, 131.8 (d,  $J = 4.0$  Hz), 127.4 (d,  $J = 1.0$  Hz), 122.6 (d,  $J = 60.6$  Hz), 34.6, 23.7 ppm;  $^{19}\text{F}$  NMR (376 MHz,  $\text{CDCl}_3$ )  $\delta$  17.50 (s, 1F) ppm. Spectroscopic data was agreement with the literature.

(*Organometallics* **2022**, *41*, 883-891)

Compound **3g**: Compound **3g** was prepared according to the General Procedure D. The crude product was purified by column chromatography (pet ether: DCM = 8:1) to afford 118.8 mg (86%) of compound **3g** as a colorless oil.  $^1\text{H}$  NMR (600 MHz,  $\text{CDCl}_3$ )



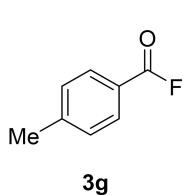

$\delta$  7.93 (d,  $J$  = 8.4 Hz, 2H), 7.32 (d,  $J$  = 8.4 Hz, 2H), 2.46 (s, 3H).  $^{13}\text{C}$  NMR (150 MHz,  $\text{CDCl}_3$ )  $\delta$  157.7 (d,  $J$  = 340.7 Hz), 146.8, 131.7 (d,  $J$  = 4.0 Hz), 130.0 (d,  $J$  = 0.8 Hz), 122.4 (d,  $J$  = 60.6 Hz), 22.1 ppm;  $^{19}\text{F}$  NMR (376 MHz,  $\text{CDCl}_3$ )  $\delta$  17.38 (s, 1F) ppm. Spectroscopic data was agreement with the literature. (*Organometallics* **2022**, *41*, 883-891)

Compound **3h**: Compound **3h** was prepared according to the General Procedure D.

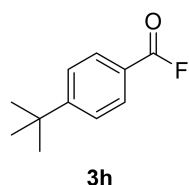

The crude product was purified by column chromatography (pet ether: DCM = 10:1) to afford 135.2 mg (75%) of compound **3h** as a colorless oil.  $^1\text{H}$  NMR (600 MHz,  $\text{CDCl}_3$ )  $\delta$  7.97 (d,  $J$  = 9.0 Hz, 2H), 7.54 (d,  $J$  = 9.0 Hz, 2H), 1.36 (s, 9H) ppm;  $^{13}\text{C}$  NMR (150 MHz,  $\text{CDCl}_3$ )  $\delta$  159.7, 157.6 (d,  $J$  = 340.8 Hz), 131.6 (d,  $J$  = 3.9 Hz), 126.3, 122.3 (d,  $J$  = 60.6 Hz), 35.6, 31.1 ppm;  $^{19}\text{F}$  NMR (376 MHz,  $\text{CDCl}_3$ )  $\delta$  17.65 (s, 1F) ppm. Spectroscopic data was agreement with the literature. (*Organometallics* **2022**, *41*, 883-891)

Compound **3i**: Compound **3i** was prepared according to the General Procedure D. The

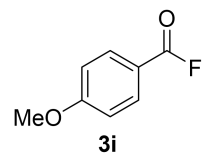

crude product was purified by column chromatography (pet ether: DCM = 8:1) to afford 140.3 mg (91%) of compound **3i** as a colorless oil.  $^1\text{H}$  NMR (600 MHz,  $\text{CDCl}_3$ )  $\delta$  7.95 (d,  $J$  = 9.0 Hz, 2H), 6.96 (dd,  $J_1$  = 9.0,  $J_2$  = 1.2 Hz, 2H), 3.87 (s, 3H) ppm;  $^{13}\text{C}$  NMR (150 MHz,  $\text{CDCl}_3$ )  $\delta$  165.4, 157.4 (d,  $J$  = 337.8 Hz), 133.8 (d,  $J$  = 3.9 Hz), 116.9 (d,  $J$  = 61.5 Hz), 114.6, 55.8 ppm;  $^{19}\text{F}$  NMR (376 MHz,  $\text{CDCl}_3$ )  $\delta$  15.88 (s, 1F) ppm. Spectroscopic data was agreement with the literature. (*J. Am. Chem. Soc.* **2022**, *144*, 9413-9420)

Compound **3j**: Compound **3j** was prepared according to the General Procedure D. The

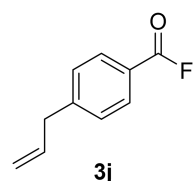

crude product was purified by column chromatography (pet ether: DCM = 8:1) to afford 139.6 mg (85%) of compound **3j** as a colorless oil.  $^1\text{H}$  NMR (600 MHz,  $\text{CDCl}_3$ )  $\delta$  7.97 (d,  $J$  = 8.4 Hz, 2H), 7.35 (d,  $J$  = 8.4 Hz, 2H), 6.00-5.91 (m, 1H), 5.22-5.08 (m, 2H), 3.48 (d,  $J$  = 6.6 Hz, 2H) ppm;

$^{13}\text{C}$  NMR (150 MHz,  $\text{CDCl}_3$ )  $\delta$  157.6 (d,  $J = 341.1$  Hz), 148.7, 135.9, 131.8 (d,  $J = 3.9$  Hz), 129.5, 123.1 (d,  $J = 60.6$  Hz), 117.4, 40.4 ppm;  $^{19}\text{F}$  NMR (376 MHz,  $\text{CDCl}_3$ )  $\delta$  17.72 (s, 1F) ppm; IR (thin film) 2812, 1809, 1712, 1595, 1381, 1351, 1119, 909, 762, 619 ( $\text{cm}^{-1}$ ); HRMS-MALDI ( $m/z$ ) calcd for  $[\text{C}_{10}\text{H}_{10}\text{FO}]^+$ , 165.0710; found, 165.0715.

Compound **3k**: Compound **3k** was prepared according to the General Procedure D.

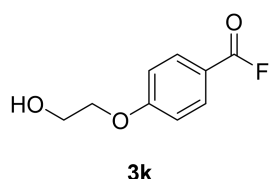

The crude product was purified by column chromatography (pet ether: EtOAc = 2:1) to afford 167.6 mg (91%) of compound **3k** as a white solid. Mp: 62-64 °C;  $^1\text{H}$  NMR (600 MHz,  $\text{CDCl}_3$ )  $\delta$  7.98 (d,  $J = 9.0$  Hz, 2H), 6.99 (d,  $J = 9.0$  Hz, 2H), 4.17 (t,  $J = 4.8$  Hz, 2H), 4.01 (t,  $J = 4.8$  Hz, 2H) ppm;  $^{13}\text{C}$  NMR (150 MHz,  $\text{CDCl}_3$ )  $\delta$  164.5, 157.4 (d,  $J = 338.1$  Hz), 134.0 (d,  $J = 4.1$  Hz), 117.4 (d,  $J = 61.5$  Hz), 115.1, 69.9, 61.3 ppm;  $^{19}\text{F}$  NMR (376 MHz,  $\text{CDCl}_3$ )  $\delta$  16.20 (s, 1F) ppm; IR (thin film) 1798, 1605, 1381, 1349, 1277, 1255, 1175, 1080, 687, 629 ( $\text{cm}^{-1}$ ); HRMS-MALDI ( $m/z$ ) calcd for  $[\text{C}_9\text{H}_9\text{FNaO}_3]^+$ , 207.0428; found, 207.0422.

Compound **3l**: Compound **3l** was prepared according to the General Procedure D. The

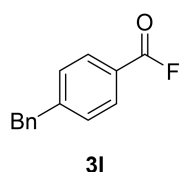

crude product was purified by column chromatography (pet ether: EtOAc = 6:1) to afford 184.2 mg (86%) of compound **3l** as a white solid.  $^1\text{H}$  NMR (600 MHz,  $\text{CDCl}_3$ )  $\delta$  7.89 (d,  $J = 8.4$  Hz, 2H), 7.29-7.24 (m, 4H), 7.19 (t,  $J = 7.2$  Hz, 1H), 7.16-7.10 (m, 2H), 4.00 (s, 2H) ppm;  $^{13}\text{C}$  NMR (100 MHz,  $\text{CDCl}_3$ )  $\delta$  157.6 (d,  $J = 341.0$  Hz), 149.7, 139.6, 131.9 (d,  $J = 4.0$  Hz), 129.8, 129.2, 128.9, 126.8, 122.9 (d,  $J = 60.7$  Hz), 42.2. ppm;  $^{19}\text{F}$  NMR (376 MHz,  $\text{CDCl}_3$ )  $\delta$  17.86 (s, 1F) ppm; IR (thin film) 1806, 1606, 1353, 1257, 1182, 1118, 1075, 1032, 1011, 908, 740, 726 ( $\text{cm}^{-1}$ ); HRMS-MALDI ( $m/z$ ) calcd for  $[\text{C}_{14}\text{H}_{12}\text{FO}]^+$ , 215.0867; found, 215.0860.

Compound **3m**: Compound **3m** was prepared according to the General Procedure D.

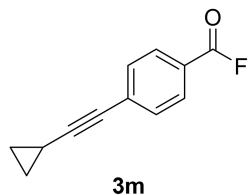

The crude product was purified by column chromatography (pet ether: EtOAc = 2:1) to afford 169.4 mg (90%) of compound **3m** as a white solid. Mp: 45-47 °C; <sup>1</sup>H NMR (400 MHz, CDCl<sub>3</sub>) δ 7.93 (d, *J* = 8.0 Hz, 2H), 7.47 (d, *J* = 8.0 Hz, 2H), 1.54-1.42 (m, 1H), 0.97-0.89 (m, 2H), 0.87-0.81 (m, 2H) ppm; <sup>13</sup>C NMR (100 MHz, CDCl<sub>3</sub>) δ 157.2 (d, *J* = 341.1 Hz), 132.2, 131.7, 131.4 (d, *J* = 3.9 Hz), 123.4 (d, *J* = 61.3 Hz), 99.6, 75.2, 9.2, 0.5 ppm; <sup>19</sup>F NMR (376 MHz, CDCl<sub>3</sub>) δ 17.96 (s, 1F) ppm; IR (thin film) 1806, 1606, 1353, 1253, 1172, 1027, 1005, 955, 908, 852, 758 (cm<sup>-1</sup>); HRMS-MALDI (*m/z*) calcd for [C<sub>12</sub>H<sub>10</sub>FO]<sup>+</sup>, 189.0710; found, 189.0705.

Compound **3n**: Compound **3n** was prepared according to the General Procedure D.

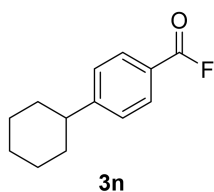

The crude product was purified by column chromatography (pet ether: DCM = 10:1) to afford 169.1 mg (82%) of compound **3n** as a white solid. <sup>1</sup>H NMR (600 MHz, CDCl<sub>3</sub>) δ 7.96 (d, *J* = 8.4 Hz, 2H), 7.35 (d, *J* = 8.4 Hz, 2H), 2.65-2.56 (m, 1H), 1.91-1.84 (m, 4H), 1.81-1.74 (m, 1H), 1.50-1.35 (m, 4H), 1.33-1.22 (m, 1H) ppm; <sup>13</sup>C NMR (150 MHz, CDCl<sub>3</sub>) δ 157.7 (d, *J* = 340.8 Hz), 156.6, 131.8 (d, *J* = 3.9 Hz), 127.8, 122.6 (d, *J* = 60.5 Hz), 45.1, 34.2, 26.8, 26.2 ppm; <sup>19</sup>F NMR (376 MHz, CDCl<sub>3</sub>) δ 16.47 (s, 1F) ppm. Spectroscopic data was agreement with the literature. (*Org. Lett.* **2021**, *23*, 847-852)

Compound **3o**: Compound **3o** was prepared according to the General Procedure D.

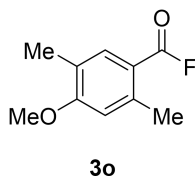

The crude product was purified by column chromatography (pet ether: DCM = 8:1) to afford 83.8 mg (46%) of compound **3o** as a white solid. Mp: 69-71 °C; <sup>1</sup>H NMR (600 MHz, CDCl<sub>3</sub>) δ 7.75 (s, 1H), 6.71 (s, 1H), 3.90 (s, 3H), 2.62 (s, 3H), 2.19 (s, 3H) ppm; <sup>13</sup>C NMR (150 MHz, CDCl<sub>3</sub>) δ 162.8, 157.0 (d, *J* = 338.4 Hz), 144.7 (d, *J* = 7.2 Hz), 135.0, 125.0, 115.0 (d, *J* = 56.6 Hz), 113.4 (d, *J* = 4.4 Hz), 55.8, 22.4, 15.7 ppm; <sup>19</sup>F NMR (376 MHz, CDCl<sub>3</sub>)

$\delta$  26.50 (s, 1F); IR (thin film) 1794, 1611, 1510, 1375, 1340, 1262, 1167, 1116, 1073, 964, 902, 865, 763 ( $\text{cm}^{-1}$ ); HRMS-MALDI ( $m/z$ ) calcd for  $[\text{C}_{10}\text{H}_{12}\text{FO}_2]^+$ , 183.0816; found, 183.0808.

Compound **3p**: Compound **3p** was prepared according to the General Procedure D.

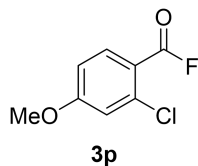

The crude product was purified by column chromatography (pet ether: DCM = 8:1) to afford 86.7 mg (46%) of compound **3p** as a white solid. Mp: 42-44 °C;  $^1\text{H}$  NMR (600 MHz,  $\text{CDCl}_3$ )  $\delta$  7.98 (d,  $J$  = 9.0 Hz, 1H), 7.05 (dd,  $J_1$  = 2.4,  $J_2$  = 1.2 Hz, 1H), 6.89 (dd,  $J_1$  = 9.0,  $J_2$  = 2.4 Hz, 1H), 3.89 (s, 3H) ppm;  $^{13}\text{C}$  NMR (150 MHz,  $\text{CDCl}_3$ )  $\delta$  164.9, 154.5 (d,  $J$  = 337.5 Hz), 139.3 (d,  $J$  = 4.8 Hz), 135.7 (d,  $J$  = 2.4 Hz), 117.6 (d,  $J$  = 3.8 Hz), 115.4 (d,  $J$  = 61.6 Hz), 113.3, 56.2 ppm;  $^{19}\text{F}$  NMR (376 MHz,  $\text{CDCl}_3$ )  $\delta$  28.72 (s, 1F); IR (thin film) 1812, 1599, 1496, 1380, 1349, 1245, 1065, 1028, 995, 868, 753, 682, 607 ( $\text{cm}^{-1}$ ); HRMS-MALDI ( $m/z$ ) calcd for  $[\text{C}_8\text{H}_6\text{ClFO}_2]$ , 188.0040; found, 188.0049.

Compound **3q**: Compound **3q** was prepared according to the General Procedure D.

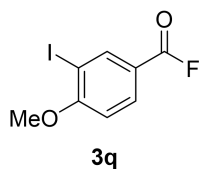

The crude product was purified by column chromatography (pet ether: DCM = 6:1) to afford 168.0 mg (60%) of compound **3q** as a white solid. Mp: 63-65 °C;  $^1\text{H}$  NMR (600 MHz,  $\text{CDCl}_3$ )  $\delta$  8.44 (d,  $J$  = 2.4 Hz, 1H), 8.05-8.00 (m, 1H), 6.89 (d,  $J$  = 9.0 Hz, 1H), 3.99 (s, 3H) ppm;  $^{13}\text{C}$  NMR (150 MHz,  $\text{CDCl}_3$ )  $\delta$  163.7, 156.1 (d,  $J$  = 339.0 Hz), 143.0 (d,  $J$  = 3.9 Hz), 134.0 (d,  $J$  = 3.8 Hz), 118.9 (d,  $J$  = 62.1 Hz), 110.6, 86.2, 57.1 ppm;  $^{19}\text{F}$  NMR (376 MHz,  $\text{CDCl}_3$ )  $\delta$  16.67 (s, 1F) ppm; IR (thin film) 1798, 1592, 1491, 1386, 1350, 1315, 1270, 1236, 1014, 825, 750, 660, 613 ( $\text{cm}^{-1}$ ); HRMS-MALDI ( $m/z$ ) calcd for  $[\text{C}_8\text{H}_6\text{FIO}_2]$ , 279.9397; found, 279.9396.

Compound **3s**: Compound **3s** was prepared according to the General Procedure D.

The crude product was purified by column chromatography (pet ether: DCM = 10:1) to afford 99.8 mg (56%) of compound **3s** as a colorless oil.  $^1\text{H}$  NMR (600 MHz,

CDCl<sub>3</sub>) δ 7.74-7.67 (m, 2H), 7.17 (d, *J* = 7.8 Hz, 1H), 2.85-2.79 (m, 4H), 1.85-1.80 (m, 4H) ppm; <sup>13</sup>C NMR (150 MHz, CDCl<sub>3</sub>) δ 157.8 (d, *J* = 340.8 Hz), 146.0, 138.3, 132.4 (d, *J* = 3.9 Hz), 129.9, 128.3 (d, *J* = 3.8 Hz), 122.0 (d, *J* = 60.0 Hz), 29.9, 29.3, 22.8, 22.7 ppm; <sup>19</sup>F NMR (376 MHz, CDCl<sub>3</sub>) δ 17.32 (s, 1F) ppm; IR (thin film) 2938, 1806, 1607, 1430, 1350, 1262, 1233, 1165, 1130, 1032, 855, 746, 624 (cm<sup>-1</sup>); HRMS-MALDI (*m/z*) calcd for [C<sub>11</sub>H<sub>11</sub>FN<sub>2</sub>O]<sup>+</sup>, 201.0686; found, 201.0686.

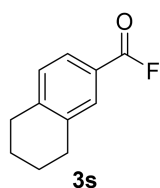

Compound **3t**: Compound **3t** was prepared according to the General Procedure D. The crude product was purified by column chromatography (pet ether: DCM = 6:1) to afford 103.5 mg (55%) of compound **3t** as a white solid. Mp: 64-66 °C; <sup>1</sup>H NMR (600 MHz, CDCl<sub>3</sub>) δ 9.07 (d, *J* = 8.4 Hz, 1H), 8.25 (dd, *J*<sub>1</sub> = 7.2, *J*<sub>2</sub> = 2.4 Hz, 1H), 8.11 (d, *J* = 8.4 Hz, 1H), 7.71 (dd, *J*<sub>1</sub> = 8.4, *J*<sub>2</sub> = 7.2 Hz, 1H), 7.64 (dd, *J*<sub>1</sub> = 8.4, *J*<sub>2</sub> = 7.2 Hz, 1H), 7.41 (d, *J* = 7.2 Hz, 1H), 2.80 (s, 3H) ppm; <sup>13</sup>C NMR (150 MHz, CDCl<sub>3</sub>) δ 156.7 (d, *J* = 340.8 Hz), 144.6, 133.8 (d, *J* = 2.4 Hz), 133.2 (d, *J* = 3.9 Hz), 132.4 (d, *J* = 7.4 Hz), 128.9, 127.0, 125.9, 125.9, 125.0, 118.8 (d, *J* = 55.8 Hz), 20.6 ppm; <sup>19</sup>F NMR (376 MHz, CDCl<sub>3</sub>) δ 28.75 (s, 1F) ppm; IR (thin film) 1791, 1514, 1383, 1351, 1244, 1226, 1172, 1087, 984, 907, 763 (cm<sup>-1</sup>); HRMS-MALDI (*m/z*) calcd for [C<sub>12</sub>H<sub>10</sub>FO]<sup>+</sup>, 189.0710; found, 189.0716.

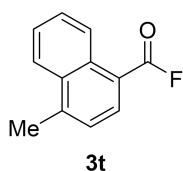

Compound **3u**: Compound **3u** was prepared according to the General Procedure D. The crude product was purified by column chromatography (pet ether: EtOAc = 1:1) to afford 147.1 mg (75%) of compound **3u** as a white solid. Mp: 119-121 °C; <sup>1</sup>H NMR (600 MHz, CDCl<sub>3</sub>) δ 7.98 (d, *J* = 8.4 Hz, 2H), 7.37 (d, *J* = 8.4 Hz, 2H), 3.05 (t, *J* = 7.8 Hz, 2H), 2.73 (t, *J* = 7.8 Hz, 2H) ppm; <sup>13</sup>C NMR (150 MHz, CDCl<sub>3</sub>) δ 178.4, 157.5 (d, *J* = 341.3 Hz), 148.6, 132.0 (d, *J* = 3.9 Hz), 129.3, 123.4 (d, *J* = 60.9 Hz), 34.9, 30.8 ppm; <sup>19</sup>F NMR (376 MHz, CDCl<sub>3</sub>) δ 17.93 (s, 1F) ppm; IR (thin film) 1805, 1603, 1381, 1347, 1324, 1288, 1258, 1181, 1002, 730, 681 (cm<sup>-1</sup>); HRMS-MALDI (*m/z*) calcd for [C<sub>10</sub>H<sub>9</sub>FKO<sub>3</sub>]<sup>+</sup>, 235.0167; found, 235.0176.

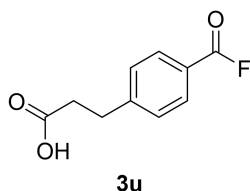

Compound **3v**: Compound **3v** was prepared according to the General Procedure D.

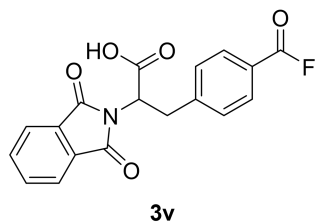

The crude product was purified by column chromatography (EtOAc) to afford 242.3 mg (71%) of compound **3v** as a white solid. Mp: 158-160 °C; <sup>1</sup>H NMR (600 MHz, DMSO-*d*<sub>6</sub>) δ 13.39 (bs, 1H), 7.88-7.81 (m, 6H), 7.46 (d, *J* = 8.4 Hz, 2H), 5.31-5.16 (m, 1H), 3.70-3.60 (m, 1H), 3.53-3.40 (m, 1H) ppm; <sup>13</sup>C NMR (150 MHz, DMSO-*d*<sub>6</sub>) δ 169.6, 167.0, 156.7 (d, *J* = 340.7 Hz), 146.3, 134.9, 131.2, 130.6, 129.9, 123.4, 122.3 (d, *J* = 60.5 Hz), 52.3, 34.2 ppm; <sup>19</sup>F NMR (376 MHz, DMSO-*d*<sub>6</sub>) δ 18.58 (s, 1F) ppm; IR (thin film) 1804, 1774, 1708, 1608, 1391, 1349, 1257, 1107, 756, 721, 560, 529 (cm<sup>-1</sup>); HRMS-MALDI (*m/z*) calcd for [C<sub>18</sub>H<sub>12</sub>FNNaO<sub>5</sub>]<sup>+</sup>, 364.0592; found, 364.0582.

Compound **3x**: To the mixture of **1x** (150.2 mg, 0.5 mmol) and

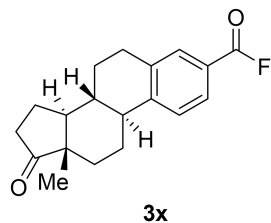

2-((difluoromethyl)sulfonyl)pyridine **2e** (193.2 mg, 1.0 mmol, 2.0 equiv) in anhydrous DMF (5.0 mL) under inert atmosphere was added the solution of *t*-BuOK (145.9 mg, 1.3 mmol, 2.6 equiv) in anhydrous DMF (2.0 mL) slowly at -78 °C, then warmed up to -30 °C slowly. The reaction was quenched with sat. NH<sub>4</sub>Cl (5 mL) and 3M HCl (5 mL) at -30 °C, warmed up to room temperature and extracted with EtOAc (10 x3), the combined organic phase was washed with brine, dried over anhydrous Na<sub>2</sub>SO<sub>4</sub>, filtered and concentrated in vacuo. Flash column chromatography (pet ether: DCM = 2:1) afforded product **3x** in 34% yield, with 50% **1x** recovery. <sup>1</sup>H NMR (400 MHz, CDCl<sub>3</sub>) δ 7.80 (d, *J* = 8.4 Hz, 1H), 7.77 (s, 1H), 7.44 (d, *J* = 8.4 Hz, 1H), 3.09-2.89 (m, 2H), 2.63-2.32 (m, 3H), 2.23-1.93 (m, 4H), 1.74-1.39 (m, 6H), 0.92 (s, 3H) ppm; <sup>19</sup>F NMR (376 MHz, CDCl<sub>3</sub>) δ 17.79 (s, 1F) ppm. Spectroscopic data was agreement with the literature. (*Org. Lett.* **2021**, *23*, 847-852)

## Preparation of compounds 4

### General Procedure E for Preparation of Benzoic Acids:

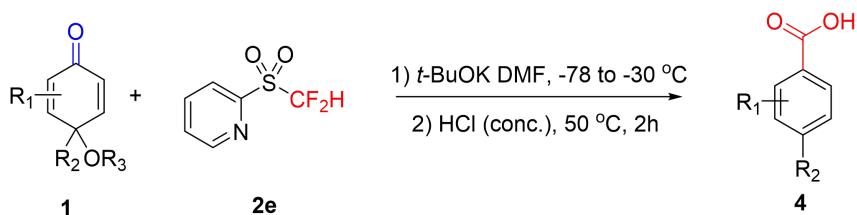

To the mixture of cyclohexadienones **1** (1.2 mmol, 1.2 equiv), 2-((difluoromethyl)sulfonyl)pyridine **2e** (1.0 mmol, 1.0 equiv) in anhydrous DMF (5.0 mL) under inert atmosphere was added the solution of *t*-BuOK (1.3 mmol, 1.3 equiv) in DMF (2.0 mL) slowly at -78 °C, then warmed up to -30 °C slowly. The reaction was quenched with concentrated hydrochloric acid (5 mL) at -30 °C and stirred at 50 °C for 2h. Then the mixture was extracted with EtOAc (10 x3), the combined organic phase was washed with brine, dried over anhydrous Na<sub>2</sub>SO<sub>4</sub>, filtered and concentrated in vacuo. Flash column chromatography afforded product **4**.

Compound **4a**: Compound **4a** was prepared according to the General Procedure E.

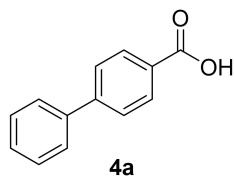

The crude product was purified by column chromatography (pet ether: EtOAc = 4:1) to afford 168.4 mg (85%) of compound **4a** as a white solid. <sup>1</sup>H NMR (600 MHz, DMSO-*d*<sub>6</sub>) δ 12.96 (s, 1H), 8.02 (d, *J* = 8.4 Hz, 2H), 7.80 (d, *J* = 8.4 Hz, 2H), 7.73 (d, *J* = 7.8 Hz, 2H), 7.50 (t, *J* = 7.8 Hz, 2H), 7.42 (t, *J* = 7.8 Hz, 1H) ppm. Spectroscopic data was agreement with the literature. (*Green Chem.* **2013**,*15*, 635-640)

Compound **4b**: Compound **4b** was prepared according to the General Procedure E.

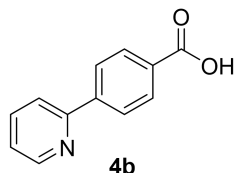

The crude product was purified by column chromatography (pet ether: EtOAc = 4:1) to afford 145.4 mg (73%) of compound **4b** as a white solid. <sup>1</sup>H NMR (600 MHz, DMSO-*d*<sub>6</sub>) δ 13.08 (bs, 1H), 8.71 (d, *J* = 4.8 Hz, 1H), 8.21 (d, *J* = 8.4 Hz, 2H), 8.08-8.02 (m, 3H), 7.98-7.90 (m, 1H), 7.44-7.39 (m, 1H) ppm. Spectroscopic data was agreement with the literature. (*J. Org. Chem.* **2018**, *83*, 15486-15492)

Compound **4c**: Compound **4c** was prepared according to the General Procedure E.

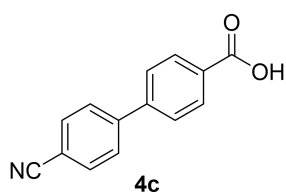

The crude product was purified by column chromatography (pet ether: EtOAc = 2:1) to afford 185.2 mg (83%) of compound **4c** as a white solid.  $^1\text{H}$  NMR (600 MHz, DMSO- $d_6$ )  $\delta$  13.09 (bs, 1H), 8.05 (d,  $J = 8.4$  Hz, 2H), 7.98-7.92 (m, 4H), 7.88 (dd,  $J_1 = 8.4$ ,  $J_2 = 1.8$  Hz, 2H) ppm. Spectroscopic data was agreement with the literature. (*J. Am. Chem. Soc.* **2019**, *141*, 16003-16013)

Compound **4d**: Compound **4d** was prepared according to the General Procedure E.

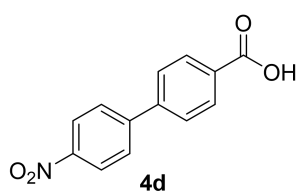

The crude product was purified by column chromatography (pet ether: EtOAc = 2:1) to afford 209.2 mg (86%) of compound **4d** as a white solid.  $^1\text{H}$  NMR (600 MHz, DMSO- $d_6$ )  $\delta$  13.12 (bs, 1H), 8.32 (d,  $J = 8.4$  Hz, 2H), 8.07 (d,  $J = 8.4$  Hz, 2H), 8.02 (d,  $J = 8.4$  Hz, 2H), 7.90 (d,  $J = 8.4$  Hz, 2H) ppm. Spectroscopic data was agreement with the literature. (*J. Org. Chem.* **2018**, *83*, 15486-15492)

Compound **4e**: Compound **4e** was prepared according to the General Procedure E.

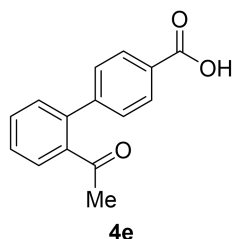

The crude product was purified by column chromatography (pet ether: EtOAc = 8:1) to afford 213.8 mg (89%) of compound **4e** as a white solid. Mp: 93-195 °C;  $^1\text{H}$  NMR (400 MHz, CDCl $_3$ )  $\delta$  8.18 (d,  $J = 8.4$  Hz, 2H), 7.62 (d,  $J = 7.6$  Hz, 1H), 7.56 (t,  $J = 7.6$  Hz, 1H), 7.51-7.43 (m, 3H), 7.40 (d,  $J = 7.6$  Hz, 1H), 2.13 (s, 3H) ppm;  $^{13}\text{C}$  NMR (150 MHz, DMSO- $d_6$ )  $\delta$  202.7, 167.1, 145.0, 140.0, 139.1, 131.1, 130.4, 129.8, 129.5, 128.9, 128.1, 128.0, 30.2 ppm; IR (thin film) 1678, 1606, 1353, 1322, 1285, 1250, 1189, 1125, 1001, 961, 908, 864, 758, 710 (cm $^{-1}$ ); HRMS-MALDI (m/z) calcd for [C $_{15}$ H $_{12}$ NaO $_3$ ] $^+$ , 263.0679; found, 263.0682.

Compound **4f**: Compound **4f** was prepared according to the General Procedure E. The crude product was purified by column chromatography (pet ether: EtOAc = 6:1) to



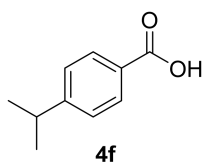

afford 156.0 mg (95%) of compound **4f** as a white solid.  $^1\text{H}$  NMR (600 MHz,  $\text{CDCl}_3$ )  $\delta$  8.05 (d,  $J = 8.4$  Hz, 2H), 7.33 (d,  $J = 8.4$  Hz, 2H), 2.99 (hept,  $J = 6.6$  Hz, 1H), 1.29 (d,  $J = 6.6$  Hz, 6H) ppm. Spectroscopic data was agreement with the literature. (*Org.*

*Lett.* **2020**, *22*, 5, 1852-1857)

Compound **4g**: Compound **4g** was prepared according to the General Procedure E.

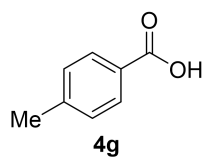

The crude product was purified by column chromatography (pet ether: EtOAc = 6:1) to afford 102.1 mg (75%) of compound **4g** as a white solid.  $^1\text{H}$  NMR (600 MHz,  $\text{CDCl}_3$ )  $\delta$  8.01 (d,  $J = 7.8$  Hz, 2H),

7.28 (d,  $J = 7.8$  Hz, 2H), 2.43 (s, 3H) ppm. Spectroscopic data was agreement with the literature. (*Org. Biomol. Chem.* **2015**, *13*, 9681-9685)

Compound **4h**: Compound **4h** was prepared according to the General Procedure E.

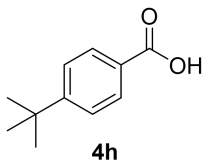

The crude product was purified by column chromatography (pet ether: EtOAc = 6:1) to afford 171.1 mg (96%) of compound **4h** as a white solid.  $^1\text{H}$  NMR (600 MHz,  $\text{CDCl}_3$ )  $\delta$  7.97 (d,  $J = 8.4$  Hz, 2H),

7.54 (d,  $J = 8.4$  Hz, 2H), 1.36 (s, 9H) ppm. Spectroscopic data was agreement with the literature. (*Org. Biomol. Chem.* **2015**, *13*, 9681-9685)

Compound **4i**: Compound **4i** was prepared according to the General Procedure E. The

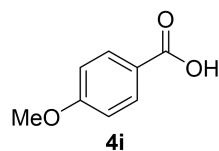

crude product was purified by column chromatography (pet ether: EtOAc = 6:1) to afford 144.5 mg (95%) of compound **4i** as a white solid.  $^1\text{H}$  NMR (600 MHz,  $\text{DMSO}-d_6$ )  $\delta$  12.59 (bs, 1H), 7.89 (d,  $J$

= 9.0 Hz, 2H), 7.01 (d,  $J = 9.0$  Hz, 2H), 3.82 (s, 3H) ppm. Spectroscopic data was agreement with the literature. (*Org. Biomol. Chem.* **2015**, *13*, 9681-9685)

Compound **4j**: Compound **4j** was prepared according to the General Procedure E. The crude product was purified by column chromatography (pet ether: EtOAc = 6:1) to afford 139.5 mg (86%) of compound **4j** as a white solid.  $^1\text{H}$  NMR (600 MHz,  $\text{CDCl}_3$ )

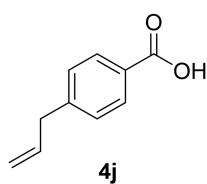

$\delta$  8.06 (d,  $J$  = 8.4 Hz, 2H), 7.30 (d,  $J$  = 8.4 Hz, 2H), 6.03-5.93 (m, 1H), 5.16-5.09 (m, 2H), 3.47 (d,  $J$  = 6.6 Hz, 2H) ppm.

Spectroscopic data was agreement with the literature. (*Org. Lett.* **2017**, *19*, 5, 3075-3078)

Compound **4k**: Compound **4k** was prepared according to the General Procedure E.

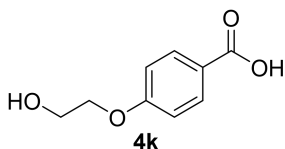

The crude product was purified by column chromatography (EtOAc) to afford 162.1 mg (89%) of compound **4k** as a white solid.  $^1\text{H}$  NMR (600 MHz, DMSO- $d_6$ )  $\delta$  12.56 (s, 1H), 7.88 (d,  $J$  = 9.0 Hz, 2H), 7.01 (d,  $J$  = 9.0 Hz, 2H), 4.89 (t,  $J$  = 5.4 Hz, 1H), 4.06 (t,  $J$  = 5.4 Hz, 2H), 3.73 (q,  $J$  = 5.4 Hz, 2H) ppm. Spectroscopic data was agreement with the

literature. (*Org. Biomol. Chem.* **2014**, *12*, 4747-4753)

Compound **4l**: Compound **4l** was prepared according to the General Procedure E. The

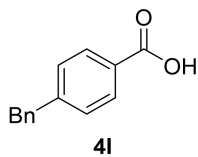

crude product was purified by column chromatography (pet ether: EtOAc = 6:1) to afford 159.2 mg (75%) of compound **4l** as a white solid.  $^1\text{H}$  NMR (600 MHz,  $\text{CDCl}_3$ )  $\delta$  8.04 (d,  $J$  = 8.4 Hz, 2H),

7.34-7.28 (m, 4H), 7.23 (t,  $J$  = 7.2 Hz, 1H), 7.19 (d,  $J$  = 7.2 Hz, 2H), 4.04 (s, 2H) ppm. Spectroscopic data was agreement with the literature. (*Green Chem.* **2011**, *13*, 2734-2736)

Compound **4m**: Compound **4m** was prepared according to the General Procedure E.

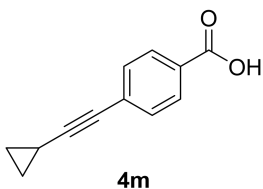

The crude product was purified by column chromatography (pet ether: EtOAc = 6:1) to afford 148.9 mg (80%) of compound **4m** as a white solid.  $^1\text{H}$  NMR (600 MHz,  $\text{CDCl}_3$ )  $\delta$  13.02 (s, 1H), 7.87 (d,  $J$  = 8.4 Hz, 2H), 7.45 (d,  $J$  = 8.4 Hz, 2H), 1.82-1.43 (m,

1H), 1.03-0.86 (m, 2H), 0.82-0.48 (m, 2H) ppm. Spectroscopic data was agreement with the literature. (*J. Med. Chem.* **2009**, *52*, 6790-6802)

Compound **4n**: Compound **4n** was prepared according to the General Procedure E.

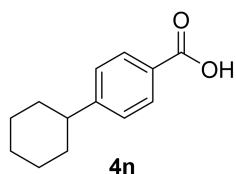

The crude product was purified by column chromatography (pet ether: EtOAc = 8:1) to afford 194.1 mg (95%) of compound **4n** as a white solid. <sup>1</sup>H NMR (600 MHz, CDCl<sub>3</sub>) δ 8.04 (d, *J* = 8.4 Hz, 2H), 7.31 (d, *J* = 8.4 Hz, 2H), 2.65-2.54 (m, 1H), 1.94-1.81 (m, 4H), 1.81-1.74 (m, 1H), 1.51-1.38 (m, 4H), 1.32-1.23 (m, 1H) ppm. Spectroscopic data was agreement with the literature. (*Org. Biomol. Chem.* **2015**, *13*, 9681-9685)

Compound **4o**: Compound **4o** was prepared according to the General Procedure E.

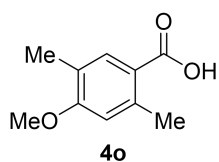

The crude product was purified by column chromatography (pet ether: EtOAc = 6:1) to afford 135.2 mg (75%) of compound **4o** as a white solid. Mp: 149-151 °C; <sup>1</sup>H NMR (600 MHz, CDCl<sub>3</sub>) δ 7.90 (s, 1H), 6.67 (s, 1H), 3.88 (s, 3H), 2.66 (s, 3H), 2.21 (s, 3H) ppm; <sup>13</sup>C NMR (150 MHz, CDCl<sub>3</sub>) δ 173.2, 161.5, 142.1, 134.5, 124.2, 120.0, 113.2, 55.6, 22.7, 15.8 ppm; IR (thin film) 1666, 1606, 1468, 1410, 1375, 1284, 1252, 1191, 1166, 1073, 1000, 925, 904, 843, 787, 757, 719 (cm<sup>-1</sup>); HRMS-MALDI (*m/z*) calcd for [C<sub>10</sub>H<sub>12</sub>NaO<sub>3</sub>]<sup>+</sup>, 203.0679; found, 203.0677.

Compound **4p**: Compound **4p** was prepared according to the General Procedure E.

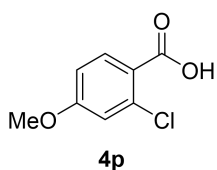

The crude product was purified by column chromatography (pet ether: EtOAc = 2:1) to afford 138.1 mg (74%) of compound **4p** as a white solid. <sup>1</sup>H NMR (400 MHz, DMSO-*d*<sub>6</sub>) δ 12.98 (s, 1H), 7.84 (d, *J* = 8.8 Hz, 1H), 7.10 (d, *J* = 2.8 Hz, 1H), 6.99 (dd, *J*<sub>1</sub> = 8.8, *J*<sub>2</sub> = 2.8 Hz, 1H), 3.83 (s, 3H) ppm. Spectroscopic data was agreement with the literature. (*J. Org. Chem.* **2007**, *72*, 3419-3429)

Compound **4q**: Compound **4q** was prepared according to the General Procedure E.

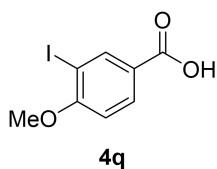

The crude product was purified by column chromatography (pet ether: EtOAc = 4:1) to afford 253.0 mg (91%) of compound **4q** as a white solid. <sup>1</sup>H NMR (600 MHz, DMSO-*d*<sub>6</sub>) δ 12.86 (bs, 1H),

8.27 (d,  $J = 1.8$  Hz, 1H), 7.95 (dd,  $J_1 = 8.4$ ,  $J_2 = 1.8$  Hz, 1H), 7.09 (d,  $J = 8.4$  Hz, 1H), 3.90 (s, 3H) ppm. Spectroscopic data was agreement with the literature. (*J. Org. Chem.* **2008**, *73*, 2130-2137)

Compound **4r**: Compound **4r** was prepared according to the General Procedure E.

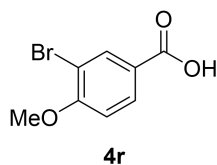

The crude product was purified by column chromatography (pet ether: EtOAc = 6:1) to afford 154.8 mg (67%) of compound **4r** as a white solid.  $^1\text{H}$  NMR (600 MHz, DMSO- $d_6$ )  $\delta$  12.93 (bs, 1H), 8.05 (d,  $J = 1.8$  Hz, 1H), 7.94 (dd,  $J_1 = 9.0$ ,  $J_2 = 1.8$  Hz, 1H), 7.21 (d,  $J = 9.0$  Hz, 1H), 3.93 (s, 3H) ppm. Spectroscopic data was agreement with the literature. (*J. Org. Chem.* **2019**, *84*, 7405-7410)

Compound **4s**: Compound **4s** was prepared according to the General Procedure E. The

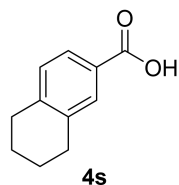

crude product was purified by column chromatography (pet ether: EtOAc = 4:1) to afford 128.6 mg (73%) of compound **4s** as a white solid.  $^1\text{H}$  NMR (600 MHz,  $\text{CDCl}_3$ )  $\delta$  7.84-7.79 (m, 2H), 7.15 (d,  $J = 7.8$  Hz, 1H), 2.83 (s, 4H), 1.86-1.80 (m, 4H) ppm. Spectroscopic data was agreement with the literature. (*Org. Lett.* **2019**, *21*, 4632-4637)

Compound **4t**: Compound **4t** was prepared according to the General Procedure E. The

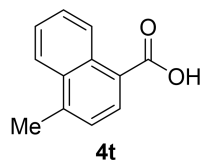

crude product was purified by column chromatography (pet ether: EtOAc = 1:1) to afford 124.8 mg (67%) of compound **4t** as a white solid.  $^1\text{H}$  NMR (600 MHz, DMSO- $d_6$ )  $\delta$  12.93 (bs, 1H), 8.96-8.91 (m, 1H), 8.13-8.08 (m, 1H), 8.05 (d,  $J = 7.2$  Hz, 1H), 7.67-7.59 (m, 2H), 7.44 (dd,  $J_1 = 7.2$ ,  $J_2 = 1.2$  Hz, 1H), 2.71 (s, 3H) ppm. Spectroscopic data was agreement with the literature. (*J. Org. Chem.* **2010**, *75*, 7855-7862)

Compound **4u**: Compound **4u** was prepared according to the General Procedure E. The crude product was purified by column chromatography (DCM: MeOH = 10:1) to afford 157.3 mg (81%) of compound **4u** as a white solid.  $^1\text{H}$  NMR (600 MHz,

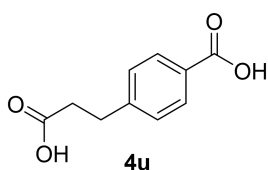

DMSO-*d*<sub>6</sub>) δ 12.46 (bs, 2H), 7.85 (d, *J* = 7.8 Hz, 2H), 7.35 (d, *J* = 7.8 Hz, 2H), 2.88 (t, *J* = 7.8 Hz, 2H), 2.57 (t, *J* = 7.8 Hz, 2H) ppm. Spectroscopic data was agreement with the literature. (*J. Am. Chem. Soc.* **2021**, *143*, 13022-13028)

Compound **4v**: Compound **4v** was prepared according to the General Procedure E.

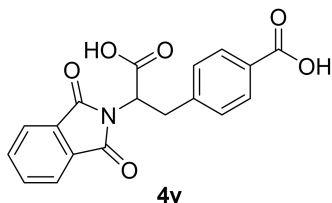

The crude product was purified by column chromatography (DCM: MeOH = 10:1) to afford 278.2 mg (82%) of compound **4v** as a white solid. Mp: 222-224 °C; <sup>1</sup>H NMR (400 MHz, DMSO-*d*<sub>6</sub>) δ 13.10 (bs,

2H), 7.84 (s, 4H), 7.75 (d, *J* = 8.0 Hz, 2H), 7.29 (d, *J* = 8.0 Hz, 2H), 5.17 (dd, *J*<sub>1</sub> = 11.6, *J*<sub>2</sub> = 4.8 Hz, 1H), 3.55 (dd, *J*<sub>1</sub> = 14.0, *J*<sub>2</sub> = 4.8 Hz, 1H), 3.46-3.35 (m, 1H) ppm; <sup>13</sup>C NMR (100 MHz, DMSO-*d*<sub>6</sub>) δ 169.9, 167.1, 167.0, 142.7, 135.0, 130.7, 129.4, 129.2, 129.0, 123.5, 52.6, 34.0, 26.3 ppm; IR (thin film) 1712, 1598, 1392, 1353, 1264, 1179, 1114, 1091, 951, 891, 872, 772, 757, 721 (cm<sup>-1</sup>); HRMS-MALDI (*m/z*) calcd for [C<sub>18</sub>H<sub>13</sub>NNaO<sub>6</sub>]<sup>+</sup>, 362.0635; found, 362.0630.

Compound **4w**: Compound **4w** was prepared according to the General Procedure E.

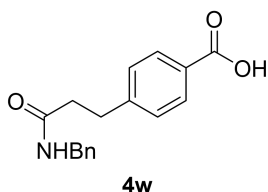

The crude product was purified by column chromatography (pet ether: EtOAc = 1:1) to afford 153.0 mg (54%) of compound **4w** as a white solid. Mp: 171-179 °C; <sup>1</sup>H NMR (600 MHz, DMSO-*d*<sub>6</sub>) δ 12.72 (bs, 1H), 8.26 (s, 1H), 7.92-7.79 (m, 2H),

7.37-7.29 (m, 2H), 7.28-7.16 (m, 3H), 7.10 (t, *J* = 8.4 Hz, 2H), 4.32-4.16 (m, 2H), 3.06-2.81 (m, 2H), 2.50-2.46 (m, 2H) ppm; <sup>13</sup>C NMR (150 MHz, DMSO-*d*<sub>6</sub>) δ 170.9, 167.2, 146.5, 139.4, 129.3, 128.5, 128.4, 128.1, 127.0, 126.6, 41.9, 36.4, 30.9 ppm; IR (thin film) 1693, 1640, 1612, 1453, 1425, 1352, 1315, 1290, 1218, 1178, 1078, 932, 865, 767, 750 (cm<sup>-1</sup>); HRMS-MALDI (*m/z*) calcd for [C<sub>17</sub>H<sub>17</sub>NNaO<sub>3</sub>]<sup>+</sup>, 306.1101; found, 306.1101.

## [<sup>18</sup>O]-Labeling Experiments

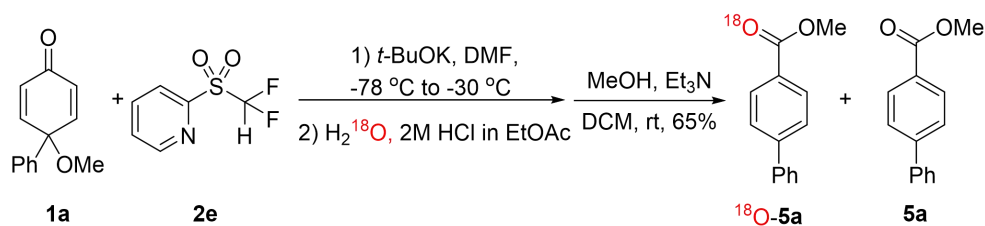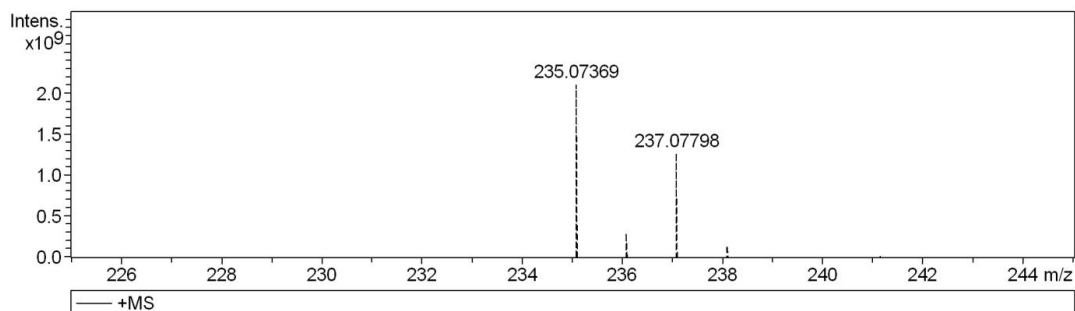

| m/z       | z | I          | Res.   |
|-----------|---|------------|--------|
| 235.07243 |   | 190577648  | 372352 |
| 235.07369 |   | 2128366592 | 203367 |
| 236.07717 |   | 305018528  | 196540 |
| 237.07798 |   | 1283649792 | 200088 |
| 301.14250 |   | 554189888  | 158000 |

Reaction conditions: To the mixture of cyclohexadienone **1a** (0.3 mmol, 1.2 equiv), 2-((difluoromethyl)sulfonyl)pyridine **2e** (0.25 mmol, 1.0 equiv) in anhydrous DMF (2.5 mL) was added the solution of *t*-BuOK (0.33 mmol, 1.3 equiv) in anhydrous DMF (0.5 mL) slowly at  $-78 } ^\circ\text{C}$ , then warmed up to  $-30 } ^\circ\text{C}$  slowly. The reaction was quenched with  $[^{18}\text{O}]\text{H}_2\text{O}$  (0.5 mL) and HCl in EtOAc (2M, 0.6 mL) at  $-30 } ^\circ\text{C}$ , the mixture was extracted with  $\text{Et}_2\text{O}$  (5 x3), the combined organic phase was concentrated in vacuo. The crude products  $^{18}\text{O}$ -**3a** and **3a** were converted to methyl benzoates  $^{18}\text{O}$ -**5a** and **5a** directly. The  $^{18}\text{O}$  was determined by HRMS. Two products were detected by HRMS analysis:  $^{18}\text{O}$ -**5a** and **5a** with the ratio 1:1.65. **5a**: HRMS-MALDI (m/z) calcd for  $[\text{C}_{14}\text{H}_{12}\text{NaO}_2]^+$ , 235.0730; found, 235.0737.  $^{18}\text{O}$ -**5a**: HRMS-MALDI (m/z) calcd for  $[\text{C}_{14}\text{H}_{12}\text{NaO}^{18}\text{O}]^+$ , 235.0772; found, 237.0780.

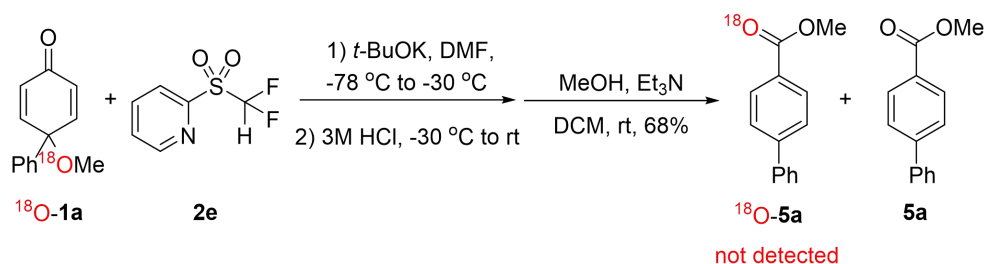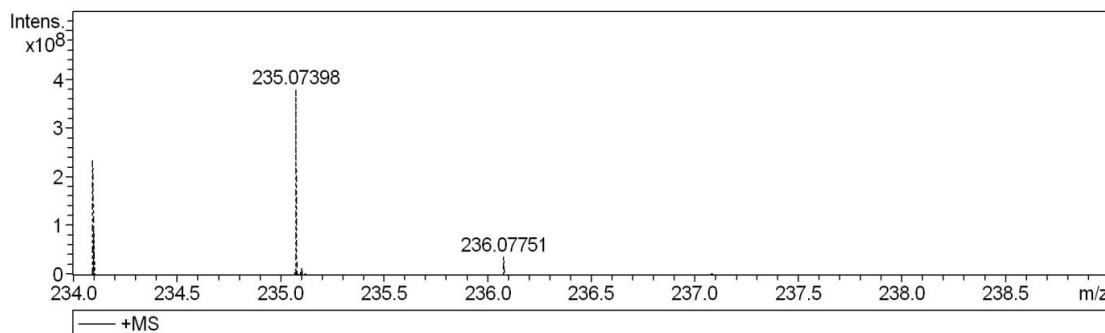

| m/z       | z | I         | Res.   |
|-----------|---|-----------|--------|
| 234.09722 |   | 237029760 | 241294 |
| 234.09835 |   | 95165768  | 156870 |
| 235.07398 |   | 380286080 | 270263 |
| 277.10345 |   | 319245568 | 173233 |

Reaction conditions: To the mixture of cyclohexadienone  $^{18}\text{O-1a}$  (0.3 mmol, 1.2 equiv), 2-((difluoromethyl)sulfonyl)pyridine  $\text{2e}$  (0.25 mmol, 1.0 equiv) in anhydrous DMF (2.5 mL) was added the solution of *t*-BuOK (0.33 mmol, 1.3 equiv) in anhydrous DMF (0.5 mL) slowly at  $-78^\circ\text{C}$ , then warmed up to  $-30^\circ\text{C}$  slowly. The reaction was quenched with 3M HCl (1 mL) at  $-30^\circ\text{C}$ , warmed up to room temperature and extracted with  $\text{Et}_2\text{O}$  (10 x3), the combined organic phase was washed with brine, dried over anhydrous  $\text{Na}_2\text{SO}_4$ , filtered and concentrated in vacuo. The crude products  $^{18}\text{O-3a}$  and  $\text{3a}$  were converted to methyl benzoates  $^{18}\text{O-5a}$  and  $\text{5a}$  directly. The  $^{18}\text{O}$  was determined by HRMS. Only  $\text{5a}$  was detected by HRMS analysis.

**5a:** HRMS-MALDI (m/z) calcd for  $[\text{C}_{14}\text{H}_{12}\text{NaO}_2]^+$ , 235.0730; found, 235.0740.

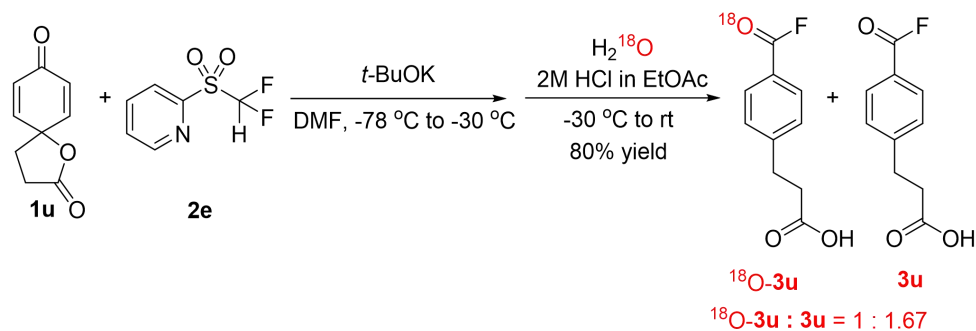

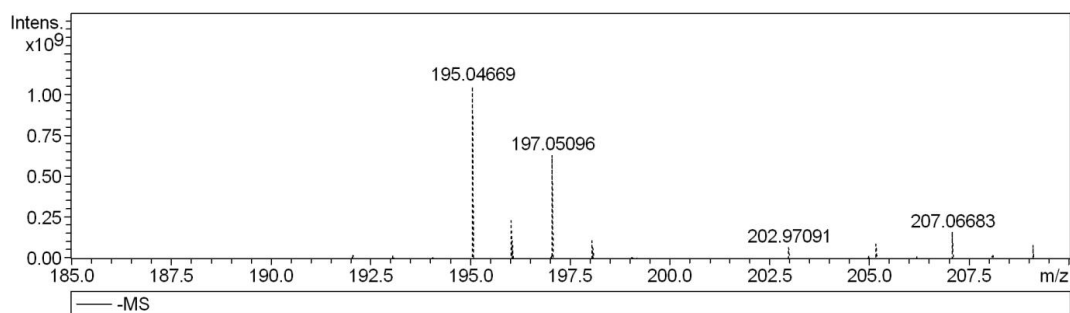

| m/z       | z | I          | Res.   |
|-----------|---|------------|--------|
| 178.03359 |   | 186444272  | 266751 |
| 180.04926 |   | 129668512  | 261975 |
| 195.04669 |   | 1056263936 | 244177 |
| 196.02424 |   | 234534752  | 243821 |
| 197.05096 |   | 633469888  | 240982 |
| 207.06683 |   | 162315264  | 228383 |

Reaction conditions: To the mixture of cyclohexadienone **1u** (0.3 mmol, 1.2 equiv), 2-((difluoromethyl)sulfonyl)pyridine **2e** (0.25 mmol, 1.0 equiv) in anhydrous DMF (2.5 mL) was added the solution of *t*-BuOK (0.33 mmol, 1.3 equiv) in anhydrous DMF (0.5 mL) slowly at -78 °C, then warmed up to -30 °C slowly. The reaction was quenched with [<sup>18</sup>O]H<sub>2</sub>O (0.5 mL) and HCl in EtOAc (2M, 0.6 mL) at -30 °C, the mixture was extracted with EtOAc (5 x3), the combined organic phase was washed with brine, dried over anhydrous Na<sub>2</sub>SO<sub>4</sub>, filtered and concentrated in vacuo. Flash column chromatography afforded products <sup>18</sup>O-**3u** and **3u**. The <sup>18</sup>O was determined by HRMS. Two products were detected by HRMS analysis: <sup>18</sup>O-**3u** and **3u** with the ratio 1:1.67. **3u**: HRMS-MALDI (m/z) calcd for [C<sub>10</sub>H<sub>8</sub>FO<sub>3</sub>]<sup>-</sup>, 195.0463; found, 195.0467. <sup>18</sup>O-**3u**: HRMS-MALDI (m/z) calcd for [C<sub>10</sub>H<sub>8</sub>FO<sub>2</sub><sup>18</sup>O]<sup>-</sup>, 197.0505; found, 197.0510.

## References:

1. Abozeid, M. A.; Kim, H. Y.; Oh, K., Silver-Catalyzed Asymmetric Desymmetrization of Cyclohexadienones via Van Leusen Pyrrole Synthesis. *Org. Lett.* **2022**, *24*, 1812-1816.
2. Yan, Y.; Li, M.; Liu, M.; Huang, M.; Cao, L.; Li, W.; Zhang, X., Sc(OTf)<sub>3</sub>-Catalyzed Dearomative [3+2] Annulation of 5-Aminoisoxazoles with Quinone Imine Ketals or Quinone Monoacetals. *Eur. J. Org. Chem.* **2022**, e202200067.
3. Wegner, J.; Ley, S. V.; Kirschning, A.; Hansen, A.-L.; Montenegro Garcia, J.; Baxendale, I. R., A Total Synthesis of Millingtonine A. *Org. Lett.* **2012**, *14*, 696-699.
4. Wang, S.; Morrow, G. W.; Swenton, J. S., Spiro-fused 2,5-cyclohexadienones from the thermal



1,3-alkyl migrations of quinol vinyl ethers. A strategy for conversion of a carbonyl carbon to a quaternary carbon. *J. Org. Chem.* **1989**, *54*, 5364-5371.

5. Moriarty, R. M.; Prakash, O. *Oxidation of Phenolic Compounds with Organohypervalent Iodine Reagents*; Wiley-VCH: Weinheim, Germany, 2001; pp 327-415.

6. Wu, L.; Hao, Y.; Liu, Y.; Wang, Q., NIS-mediated oxidative arene C(sp<sup>2</sup>)-H amidation toward 3,4-dihydro-2(1H)-quinolinone, phenanthridone, and N-fused spiro lactam derivatives. *Org. Biomol. Chem.* **2019**, *17*, 6762-6770.

### **NMR Spectra of Compounds:**

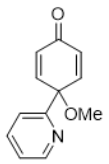

1b

8.543  
8.531  
7.748  
7.745  
7.729  
7.725  
7.710  
7.707  
7.662  
7.642  
7.260  
7.239  
7.227  
7.224  
7.222  
7.221  
7.209  
6.874  
6.873  
6.849  
6.471  
6.470  
6.446  
3.415

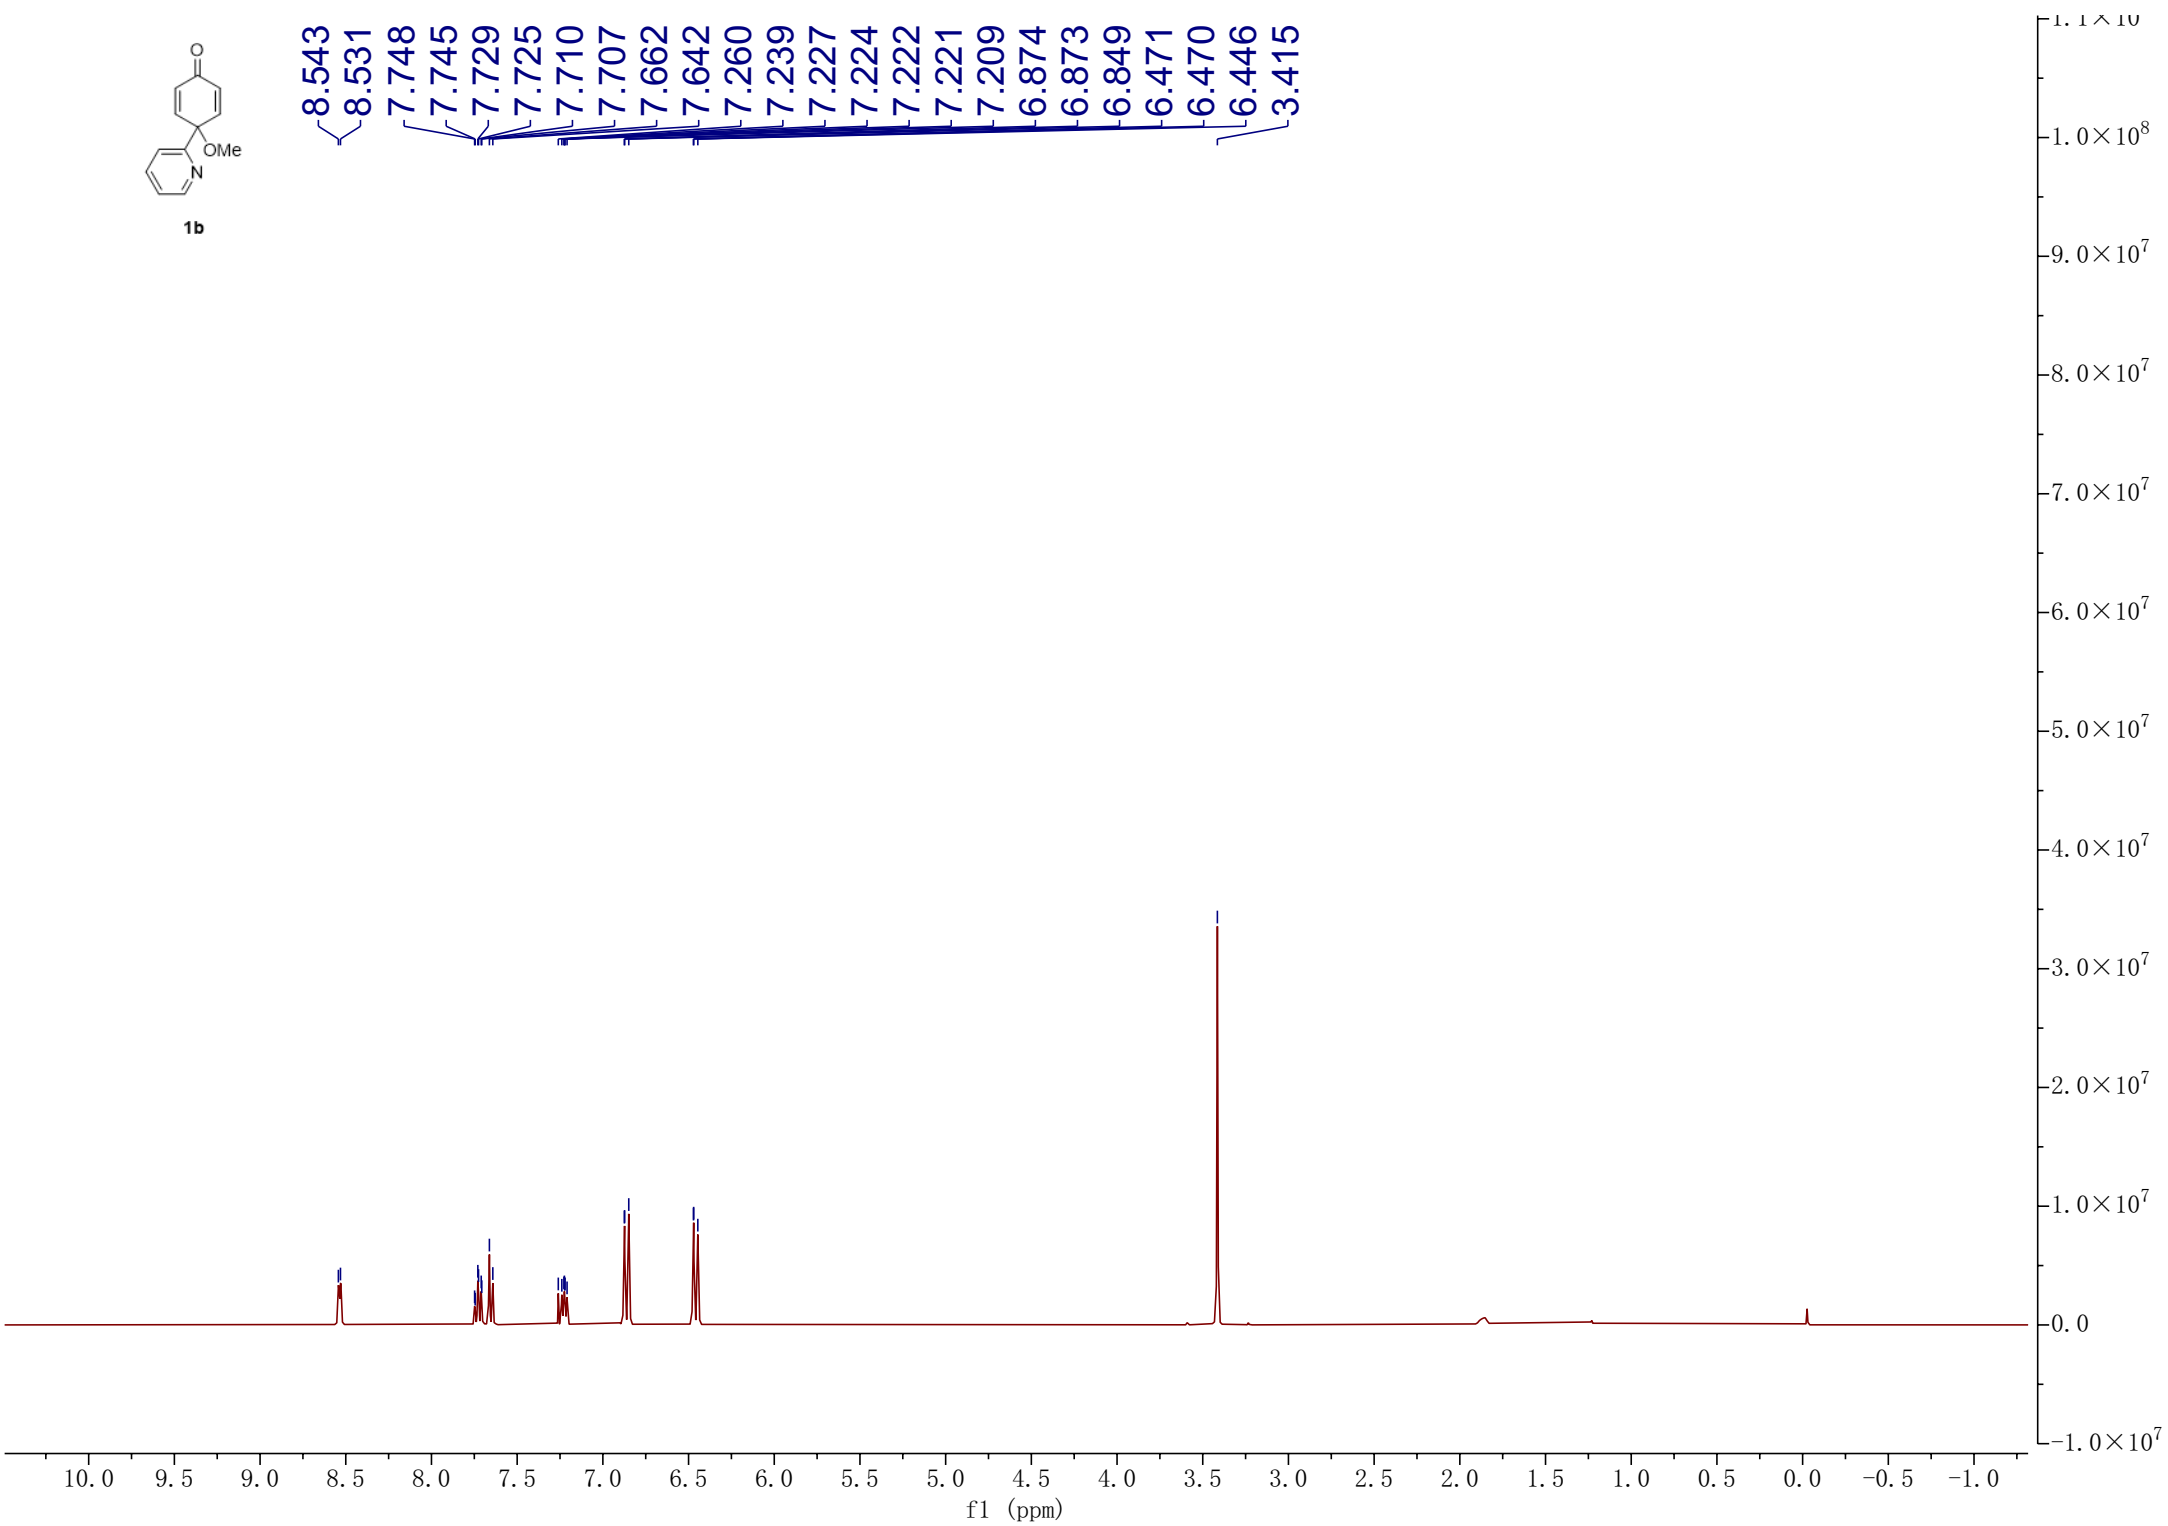

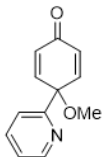

1b

— 185.74

— 158.82

└ 149.53

└ 148.99

~ 137.48

~ 131.38

└ 123.56

└ 121.27

77.61

77.55

77.23

76.91

— 53.00

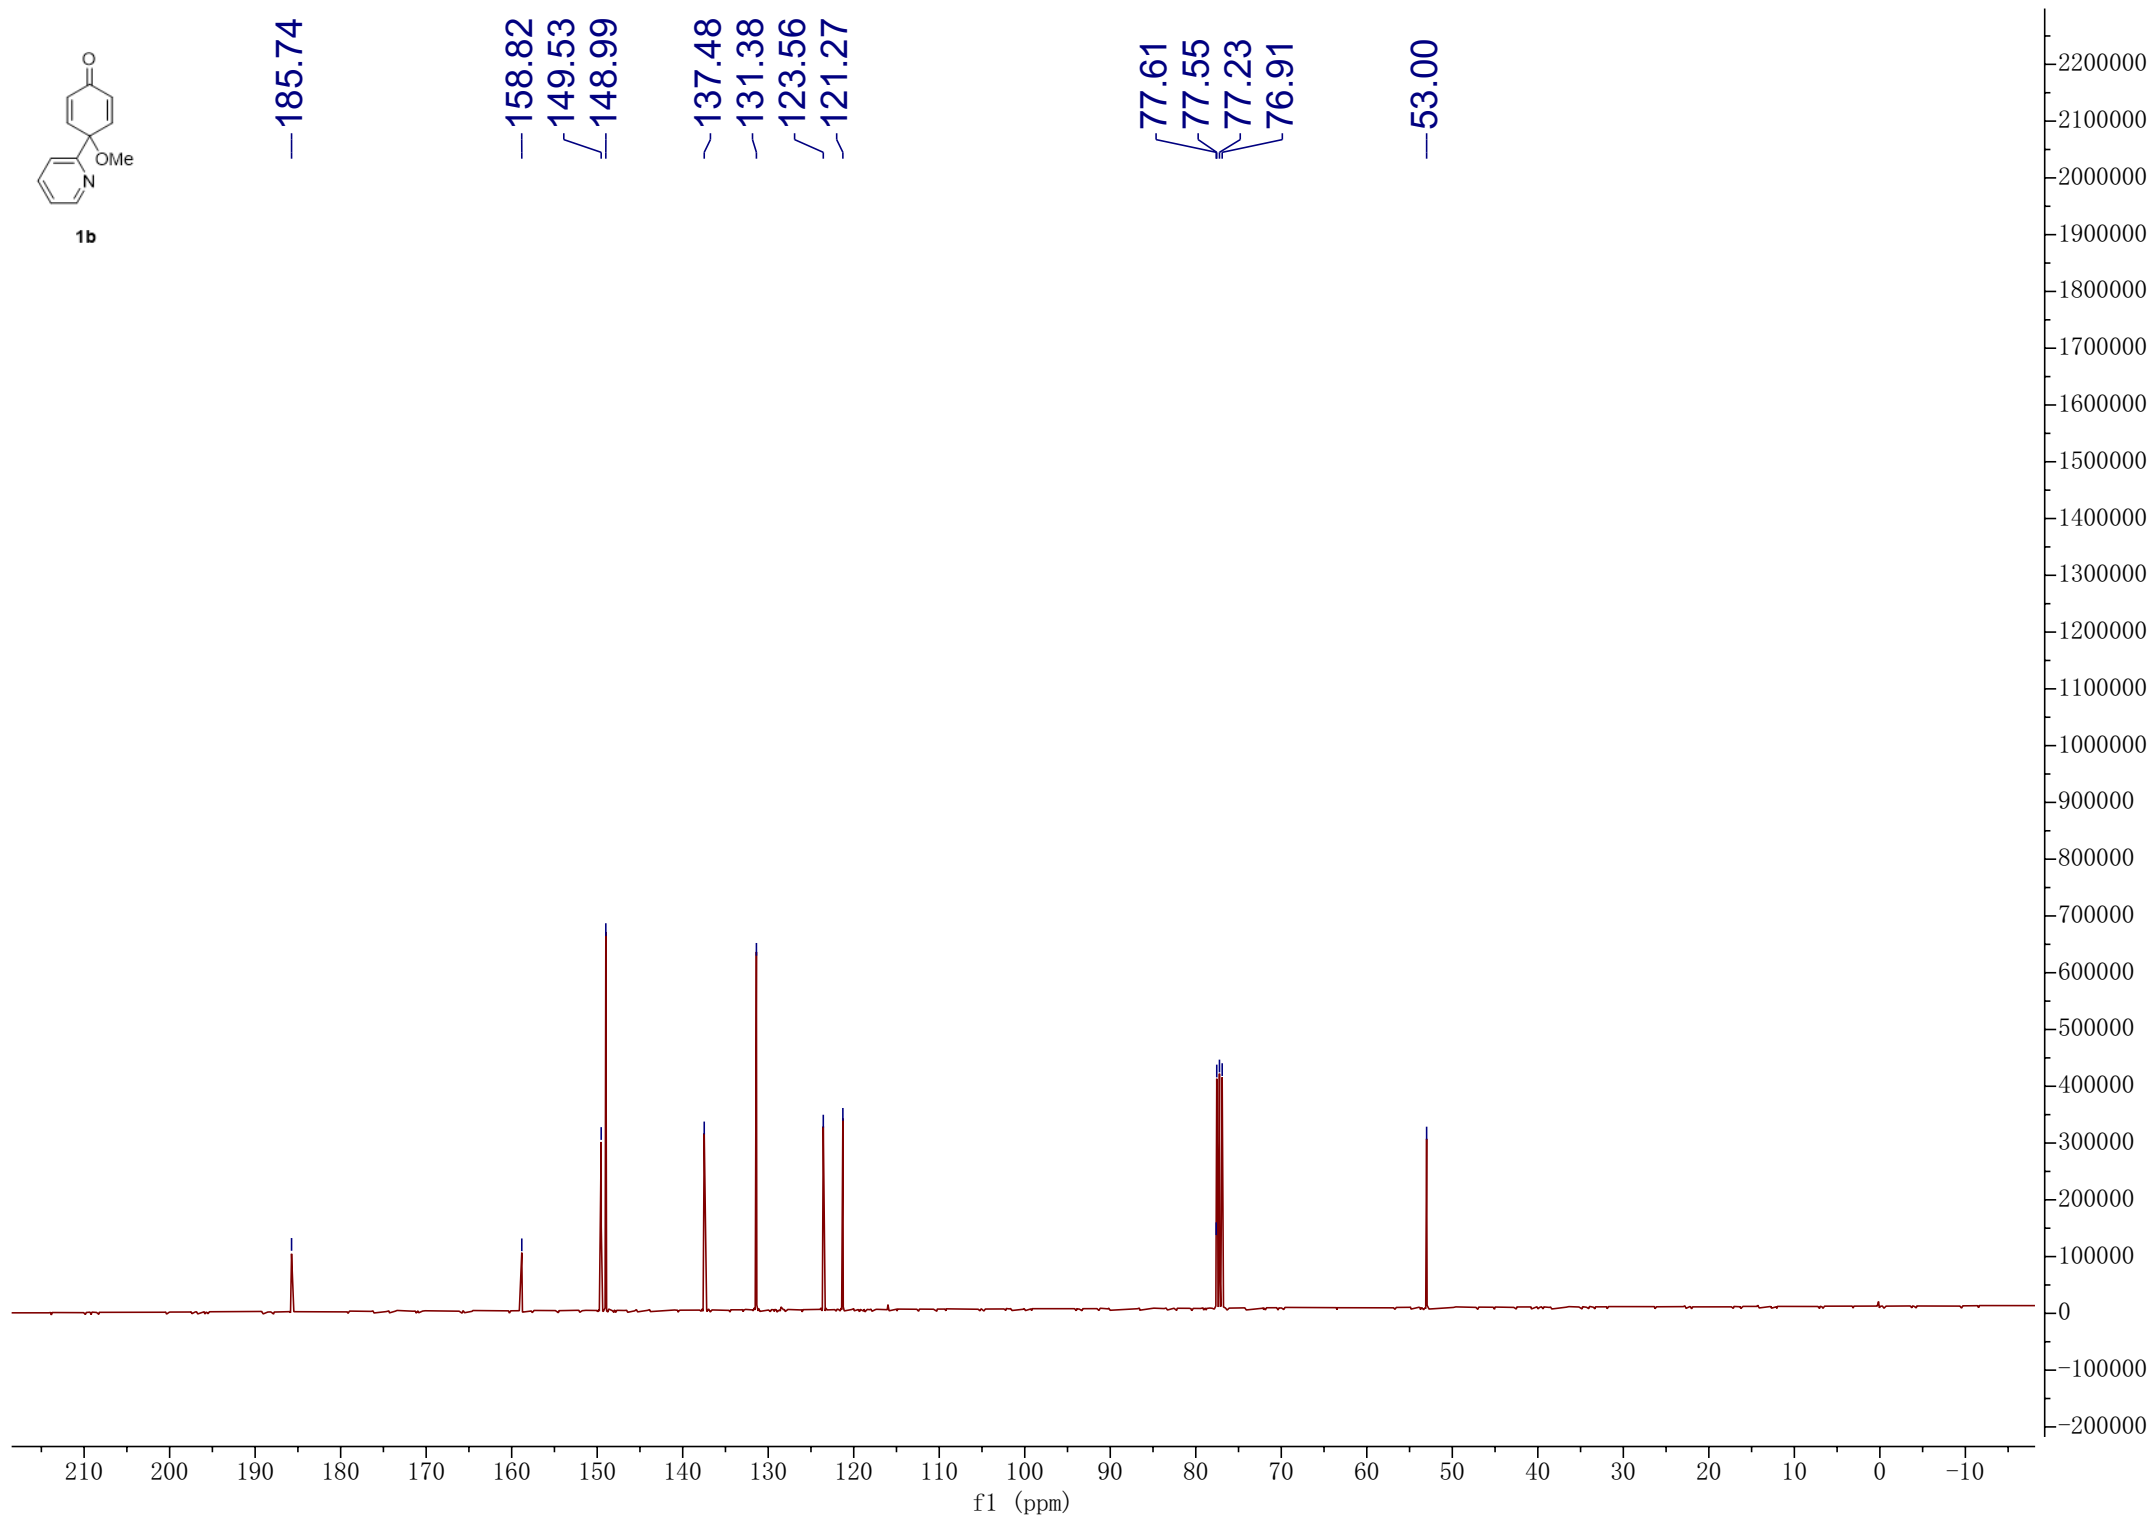

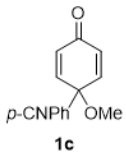

7.633  
7.611  
7.575  
7.554  
7.260  
6.714  
6.688  
6.440  
6.414

3.413

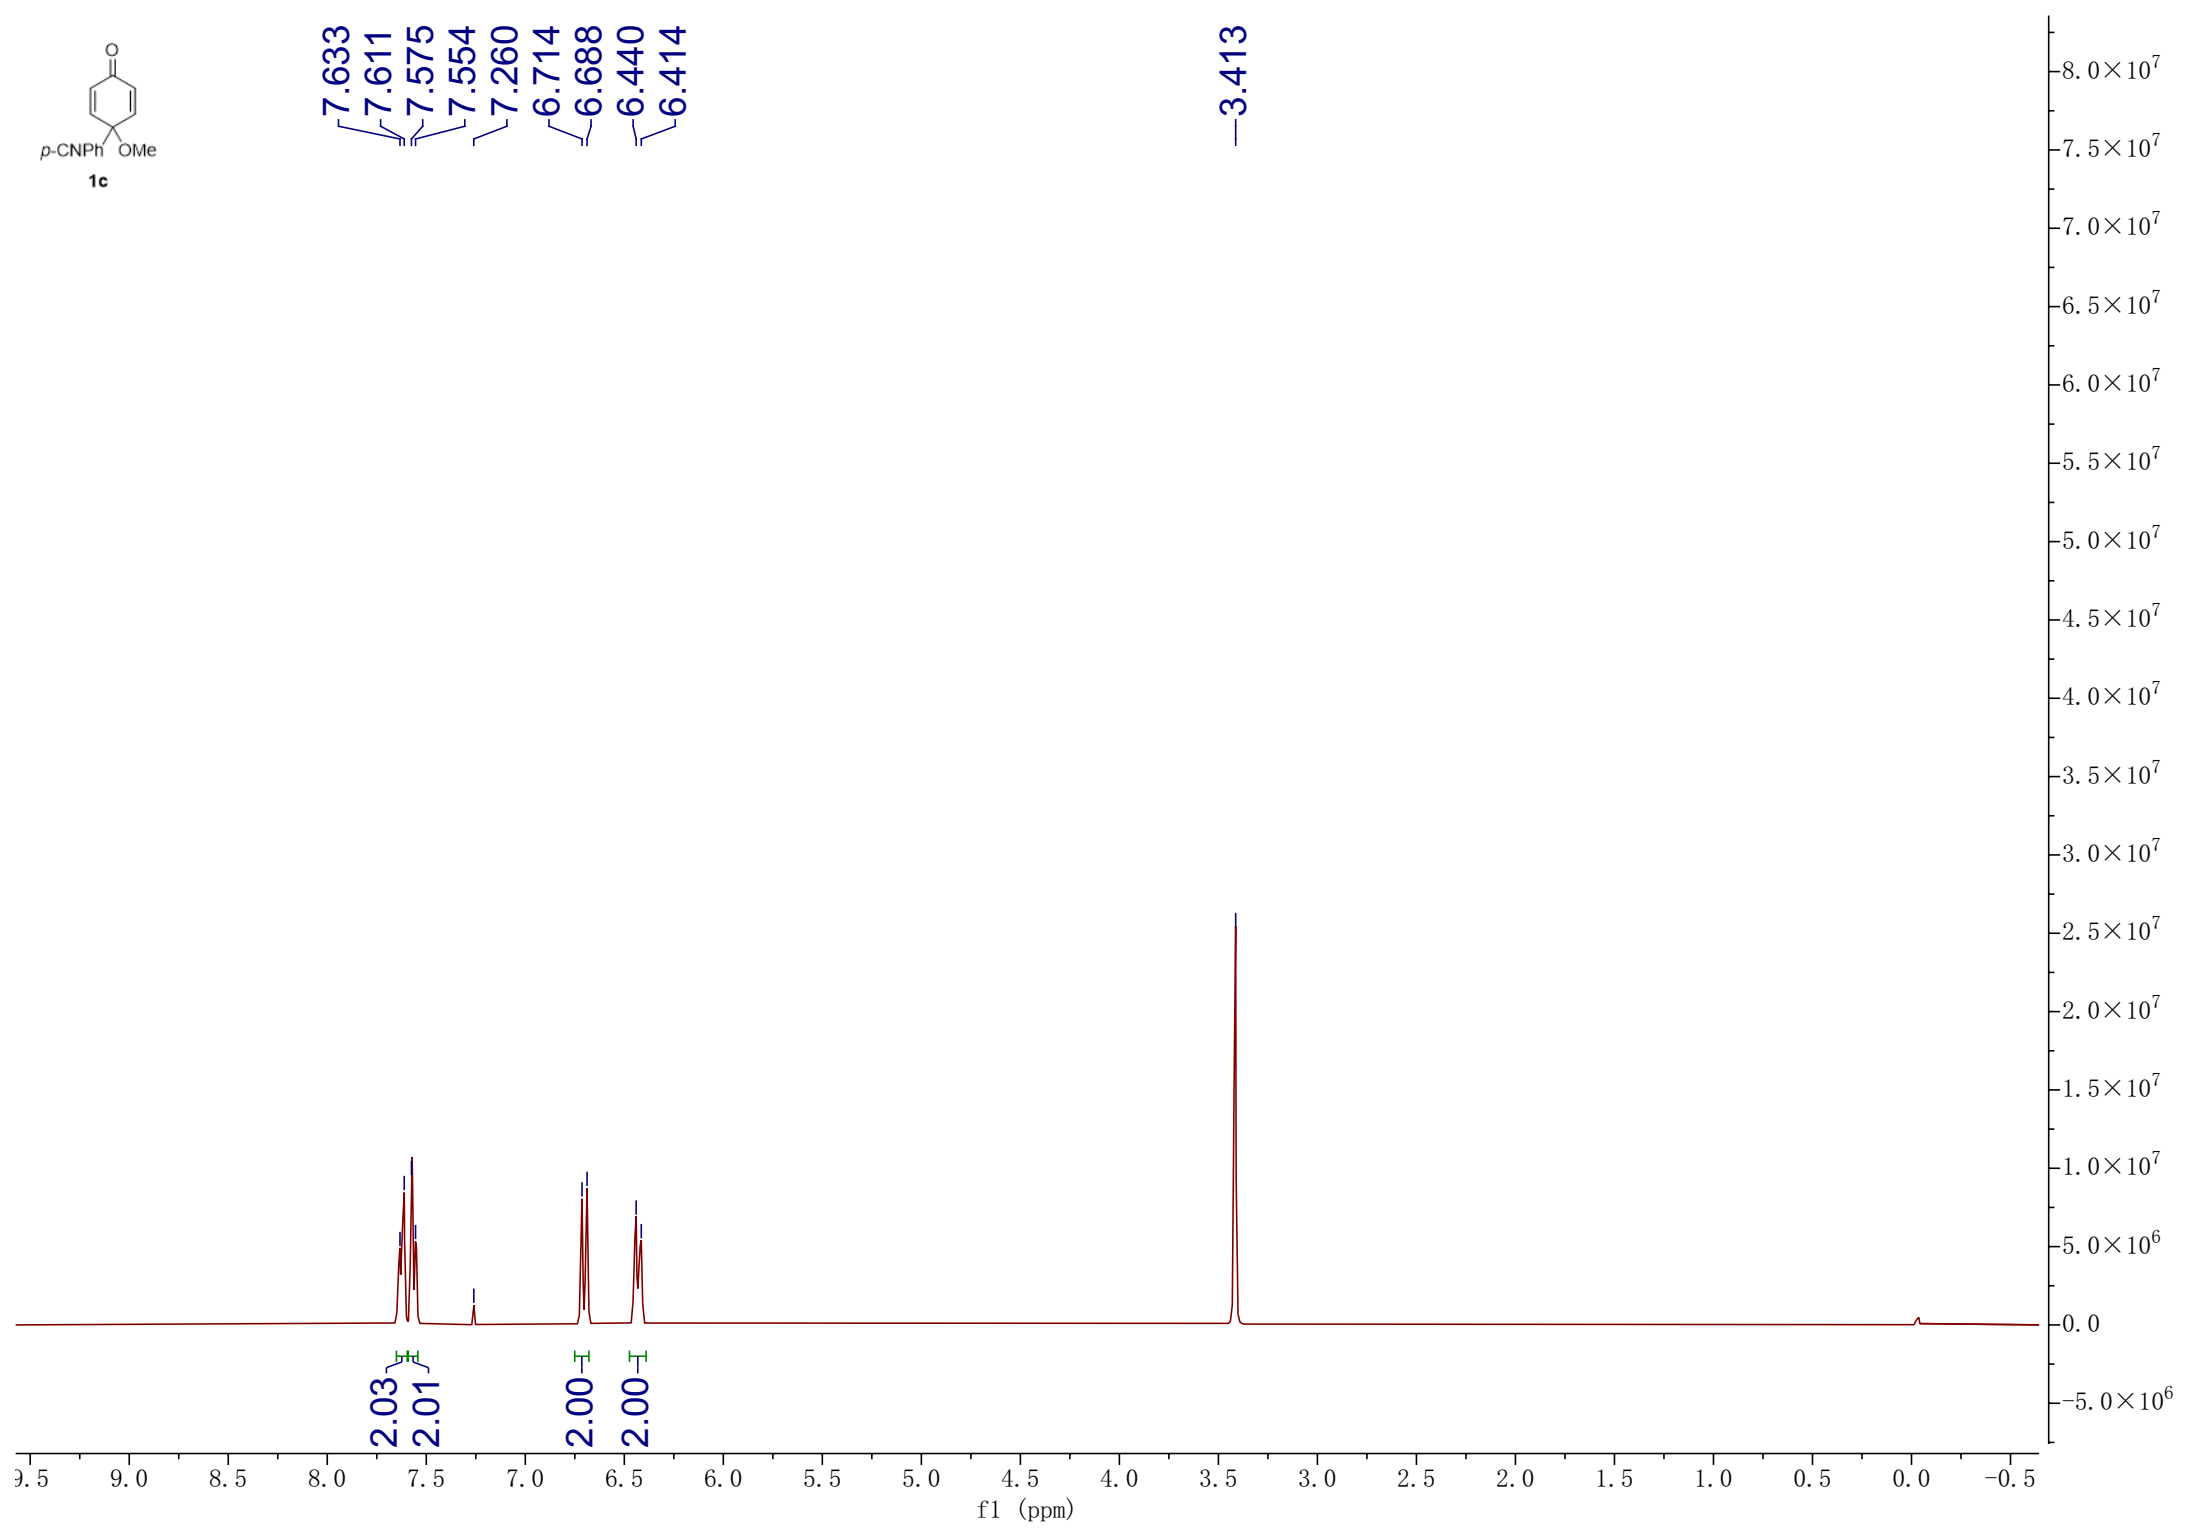

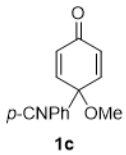

—185.02

—149.23

—143.83

—132.68

—131.08

—126.80

—118.52

—112.37

77.55

77.23

76.91

76.43

—53.11

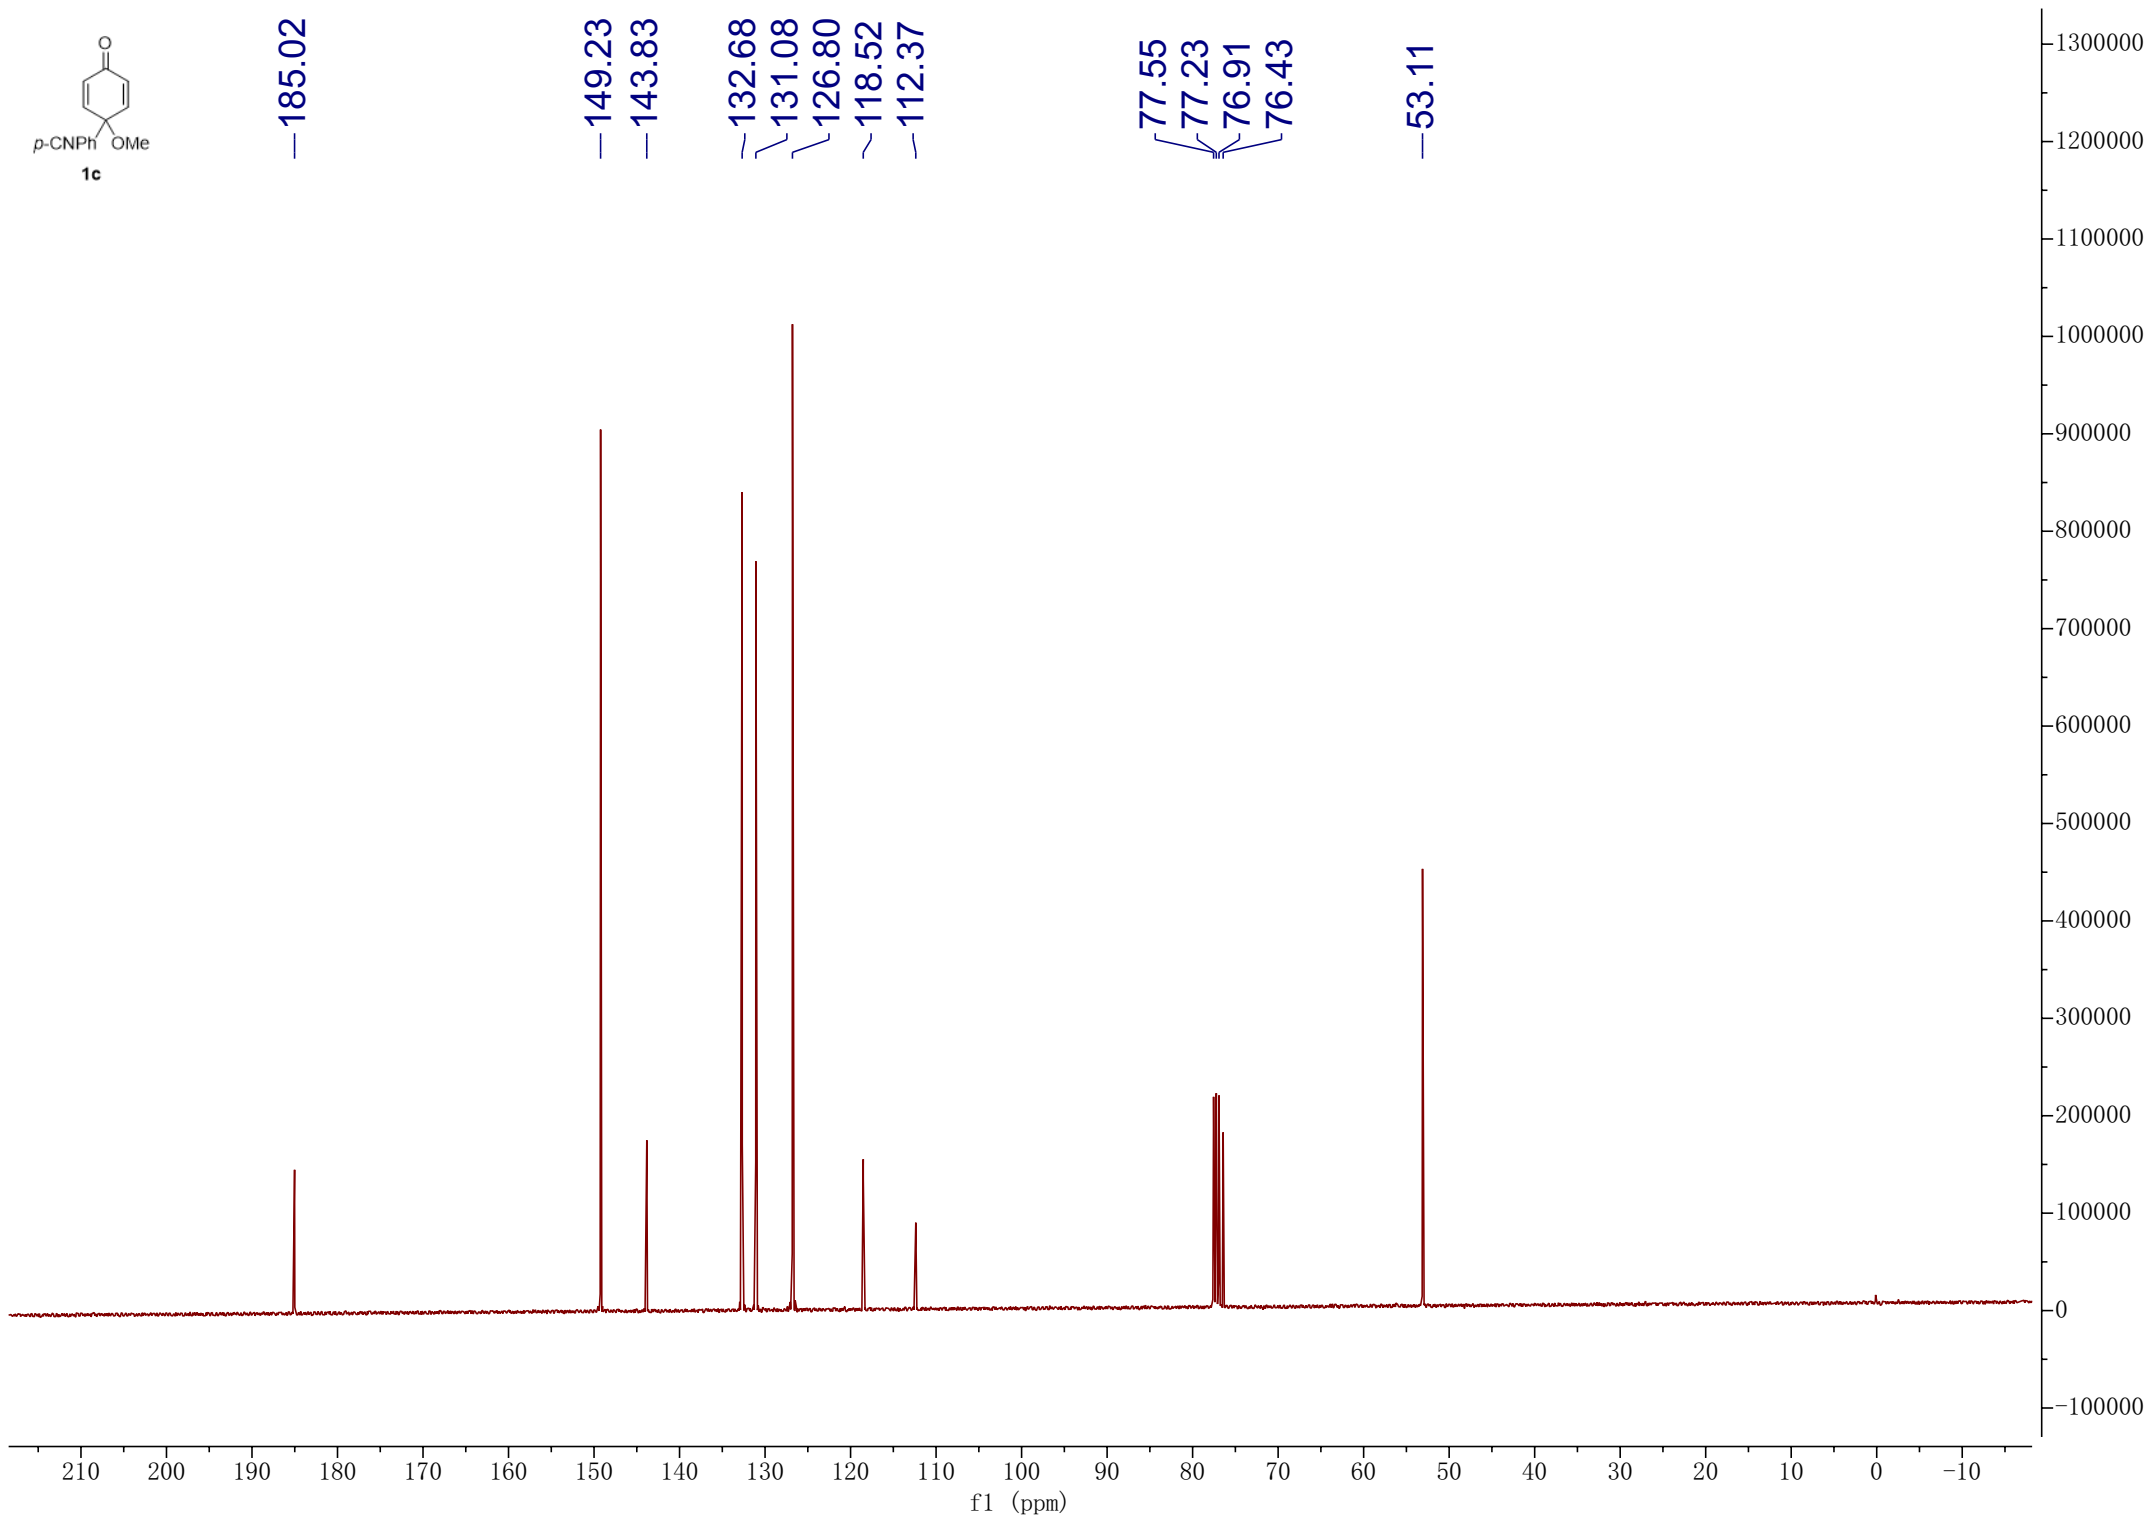

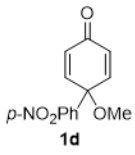

8.197  
8.175  
7.646  
7.625  
7.260  
6.737  
6.712  
6.477  
6.453

3.443

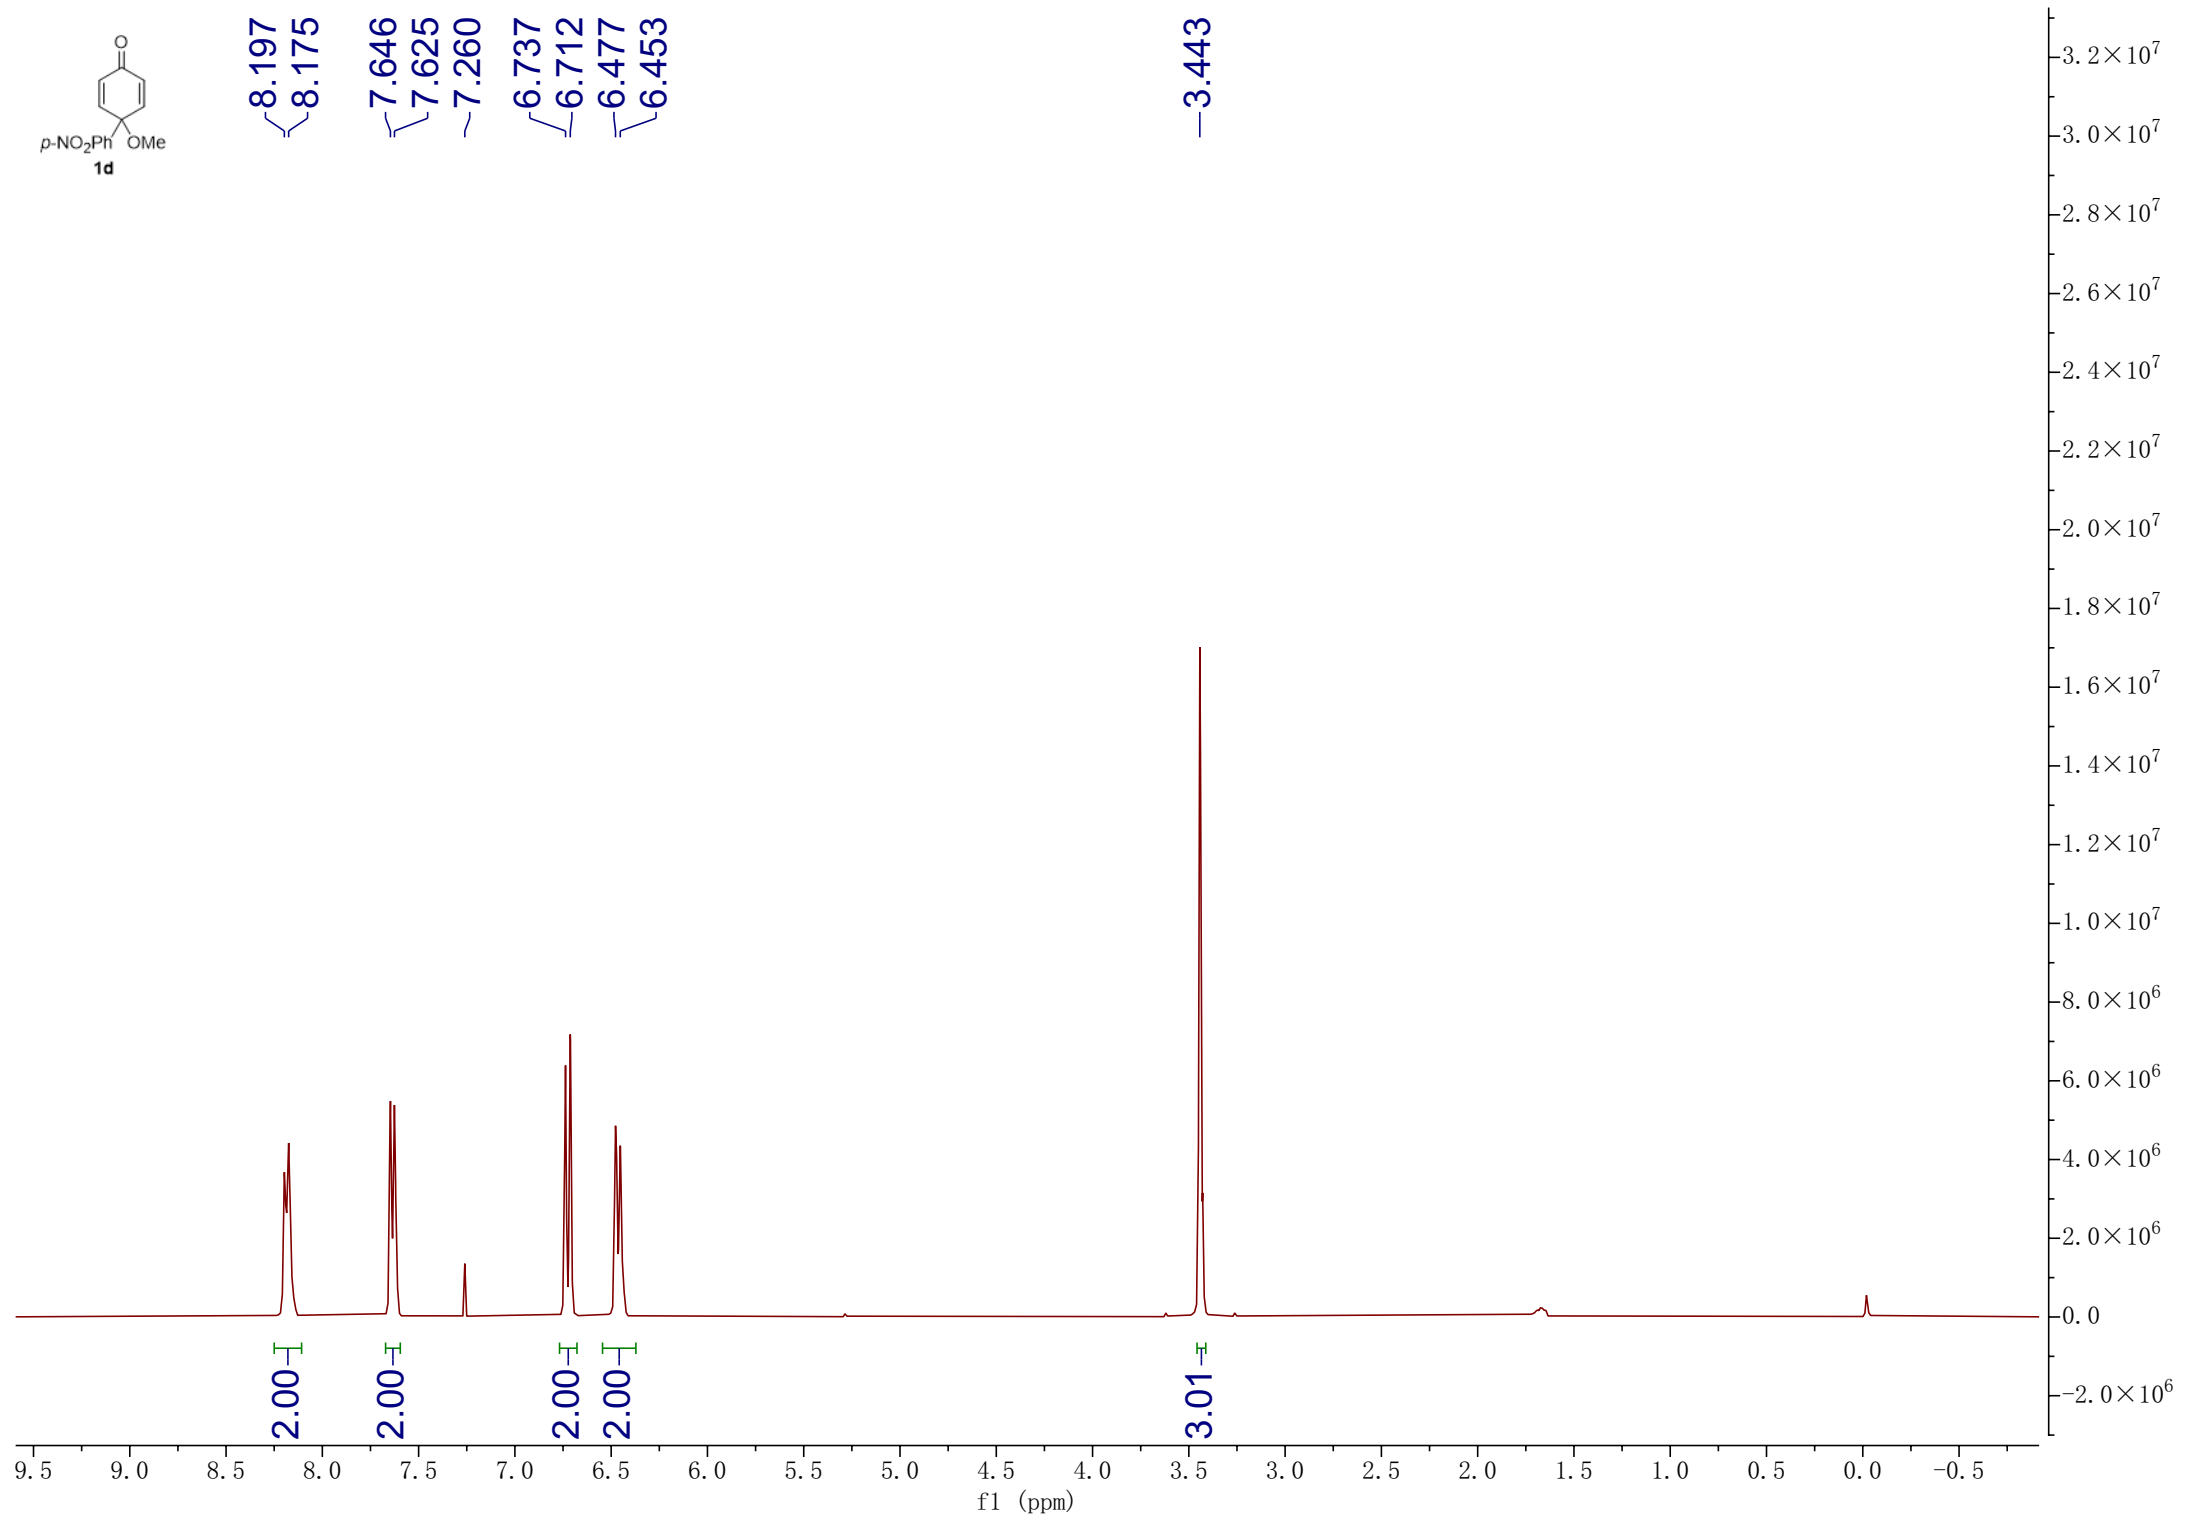

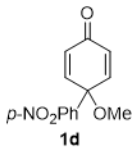

— 184.98

149.10  
147.92  
145.77

131.19  
127.07  
124.04

77.55  
77.23  
76.91  
76.45

— 53.18

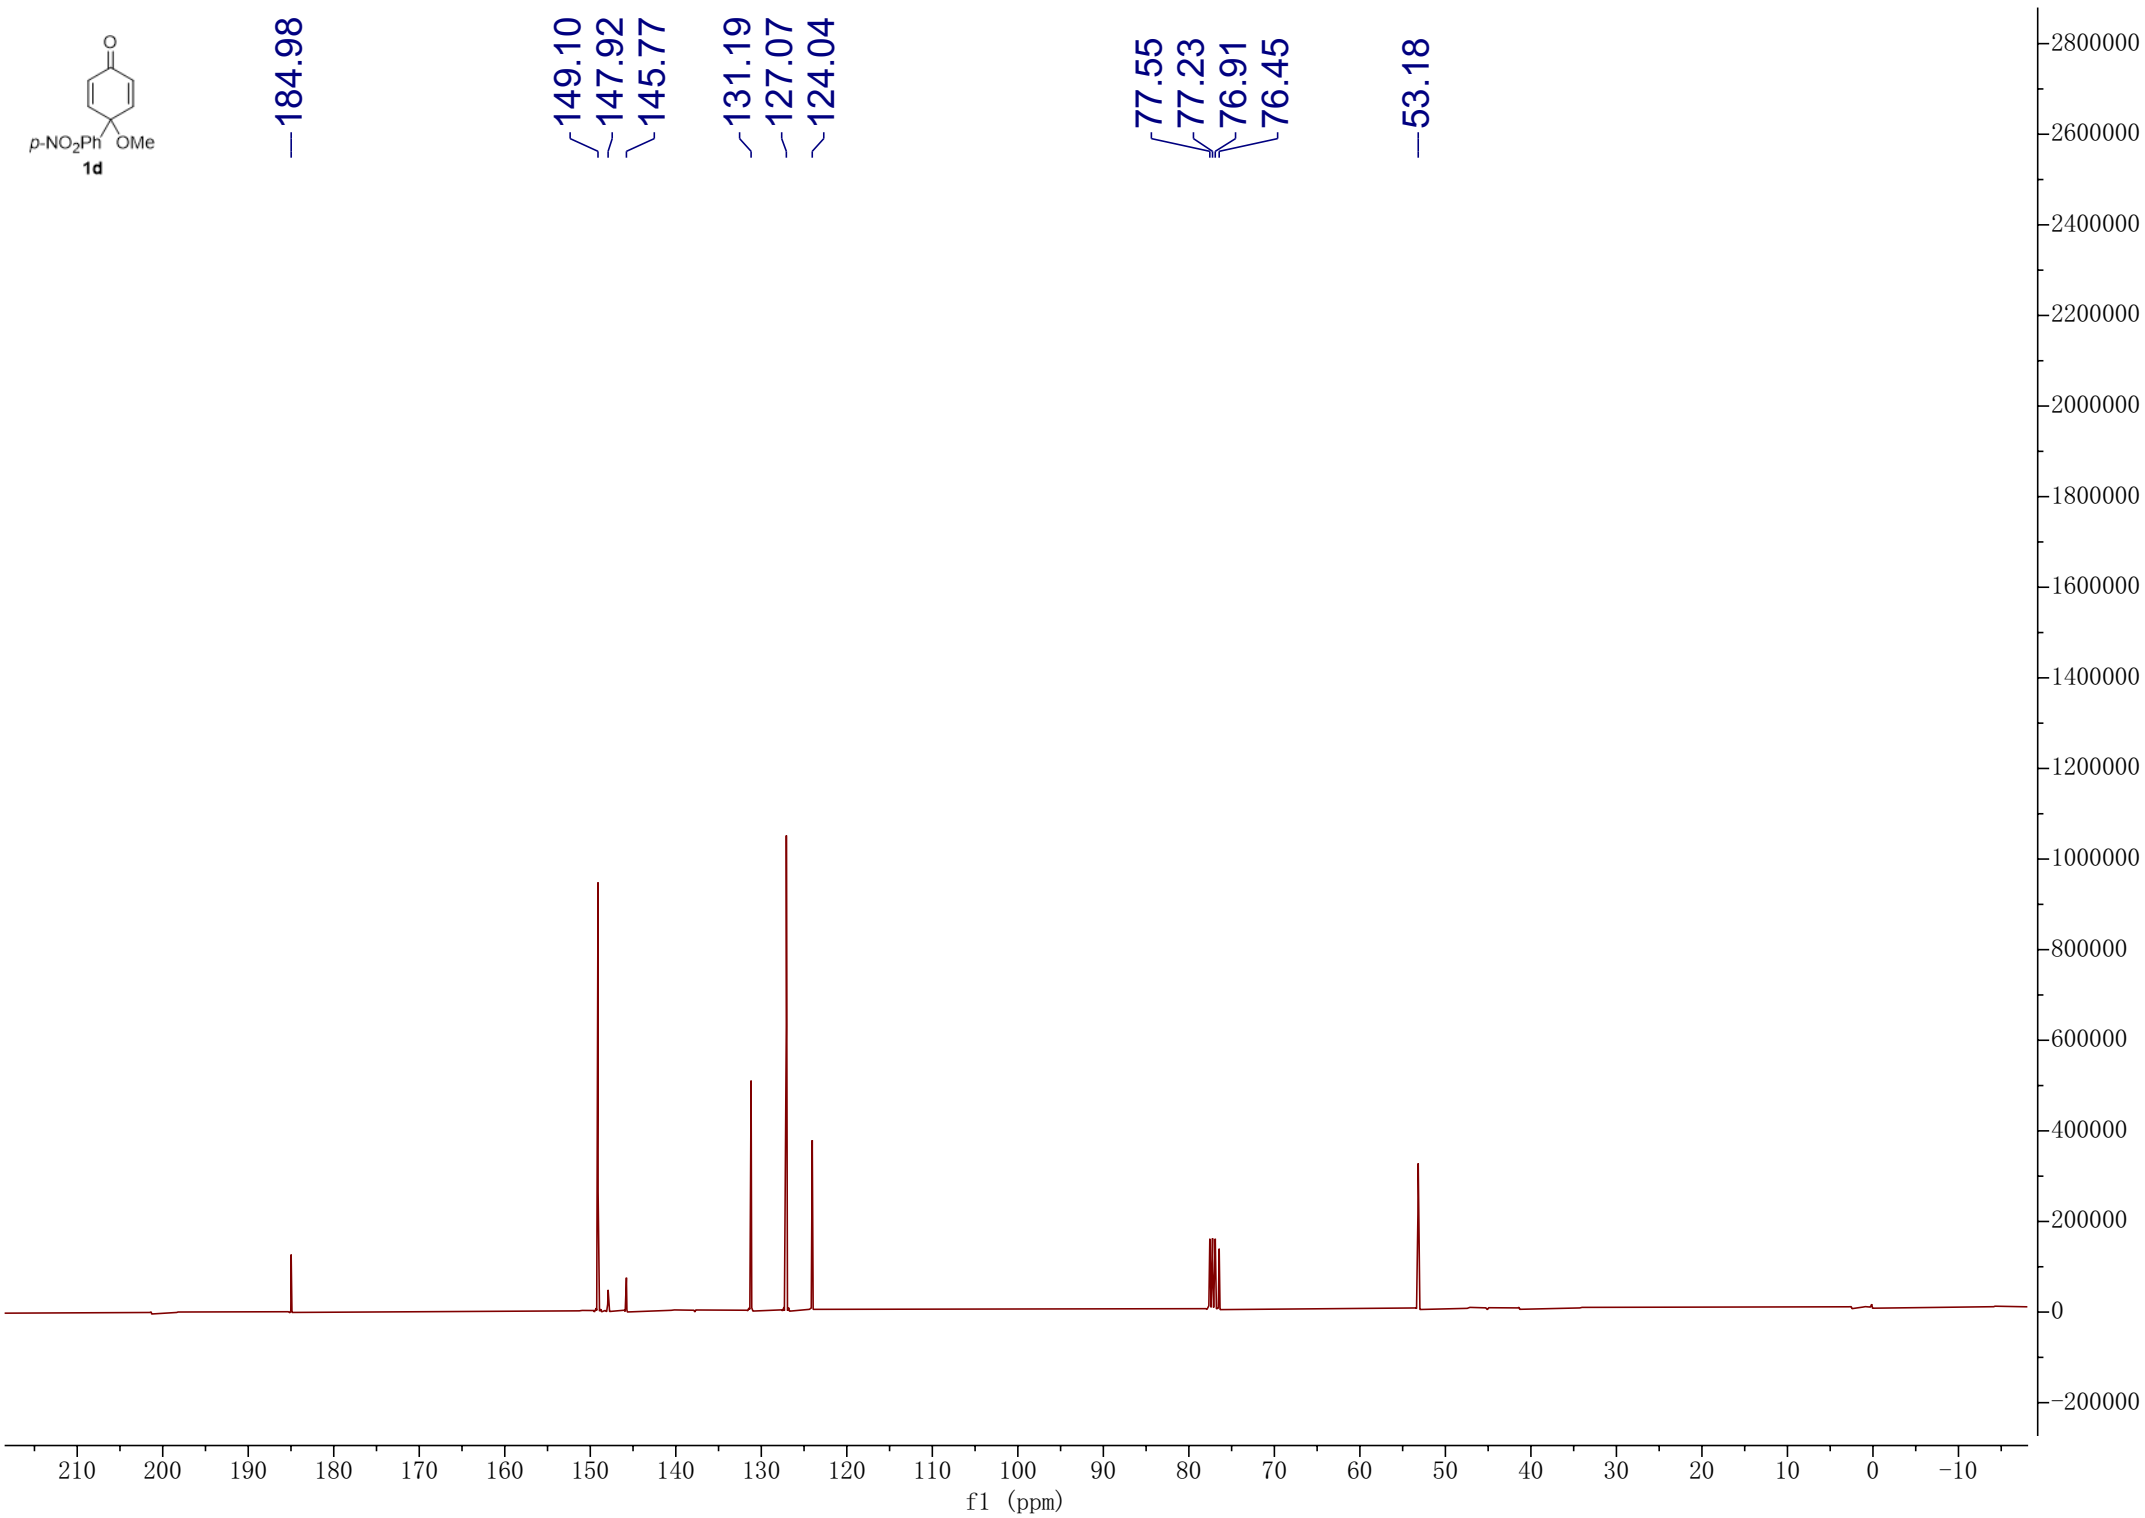

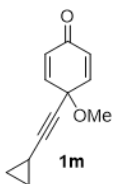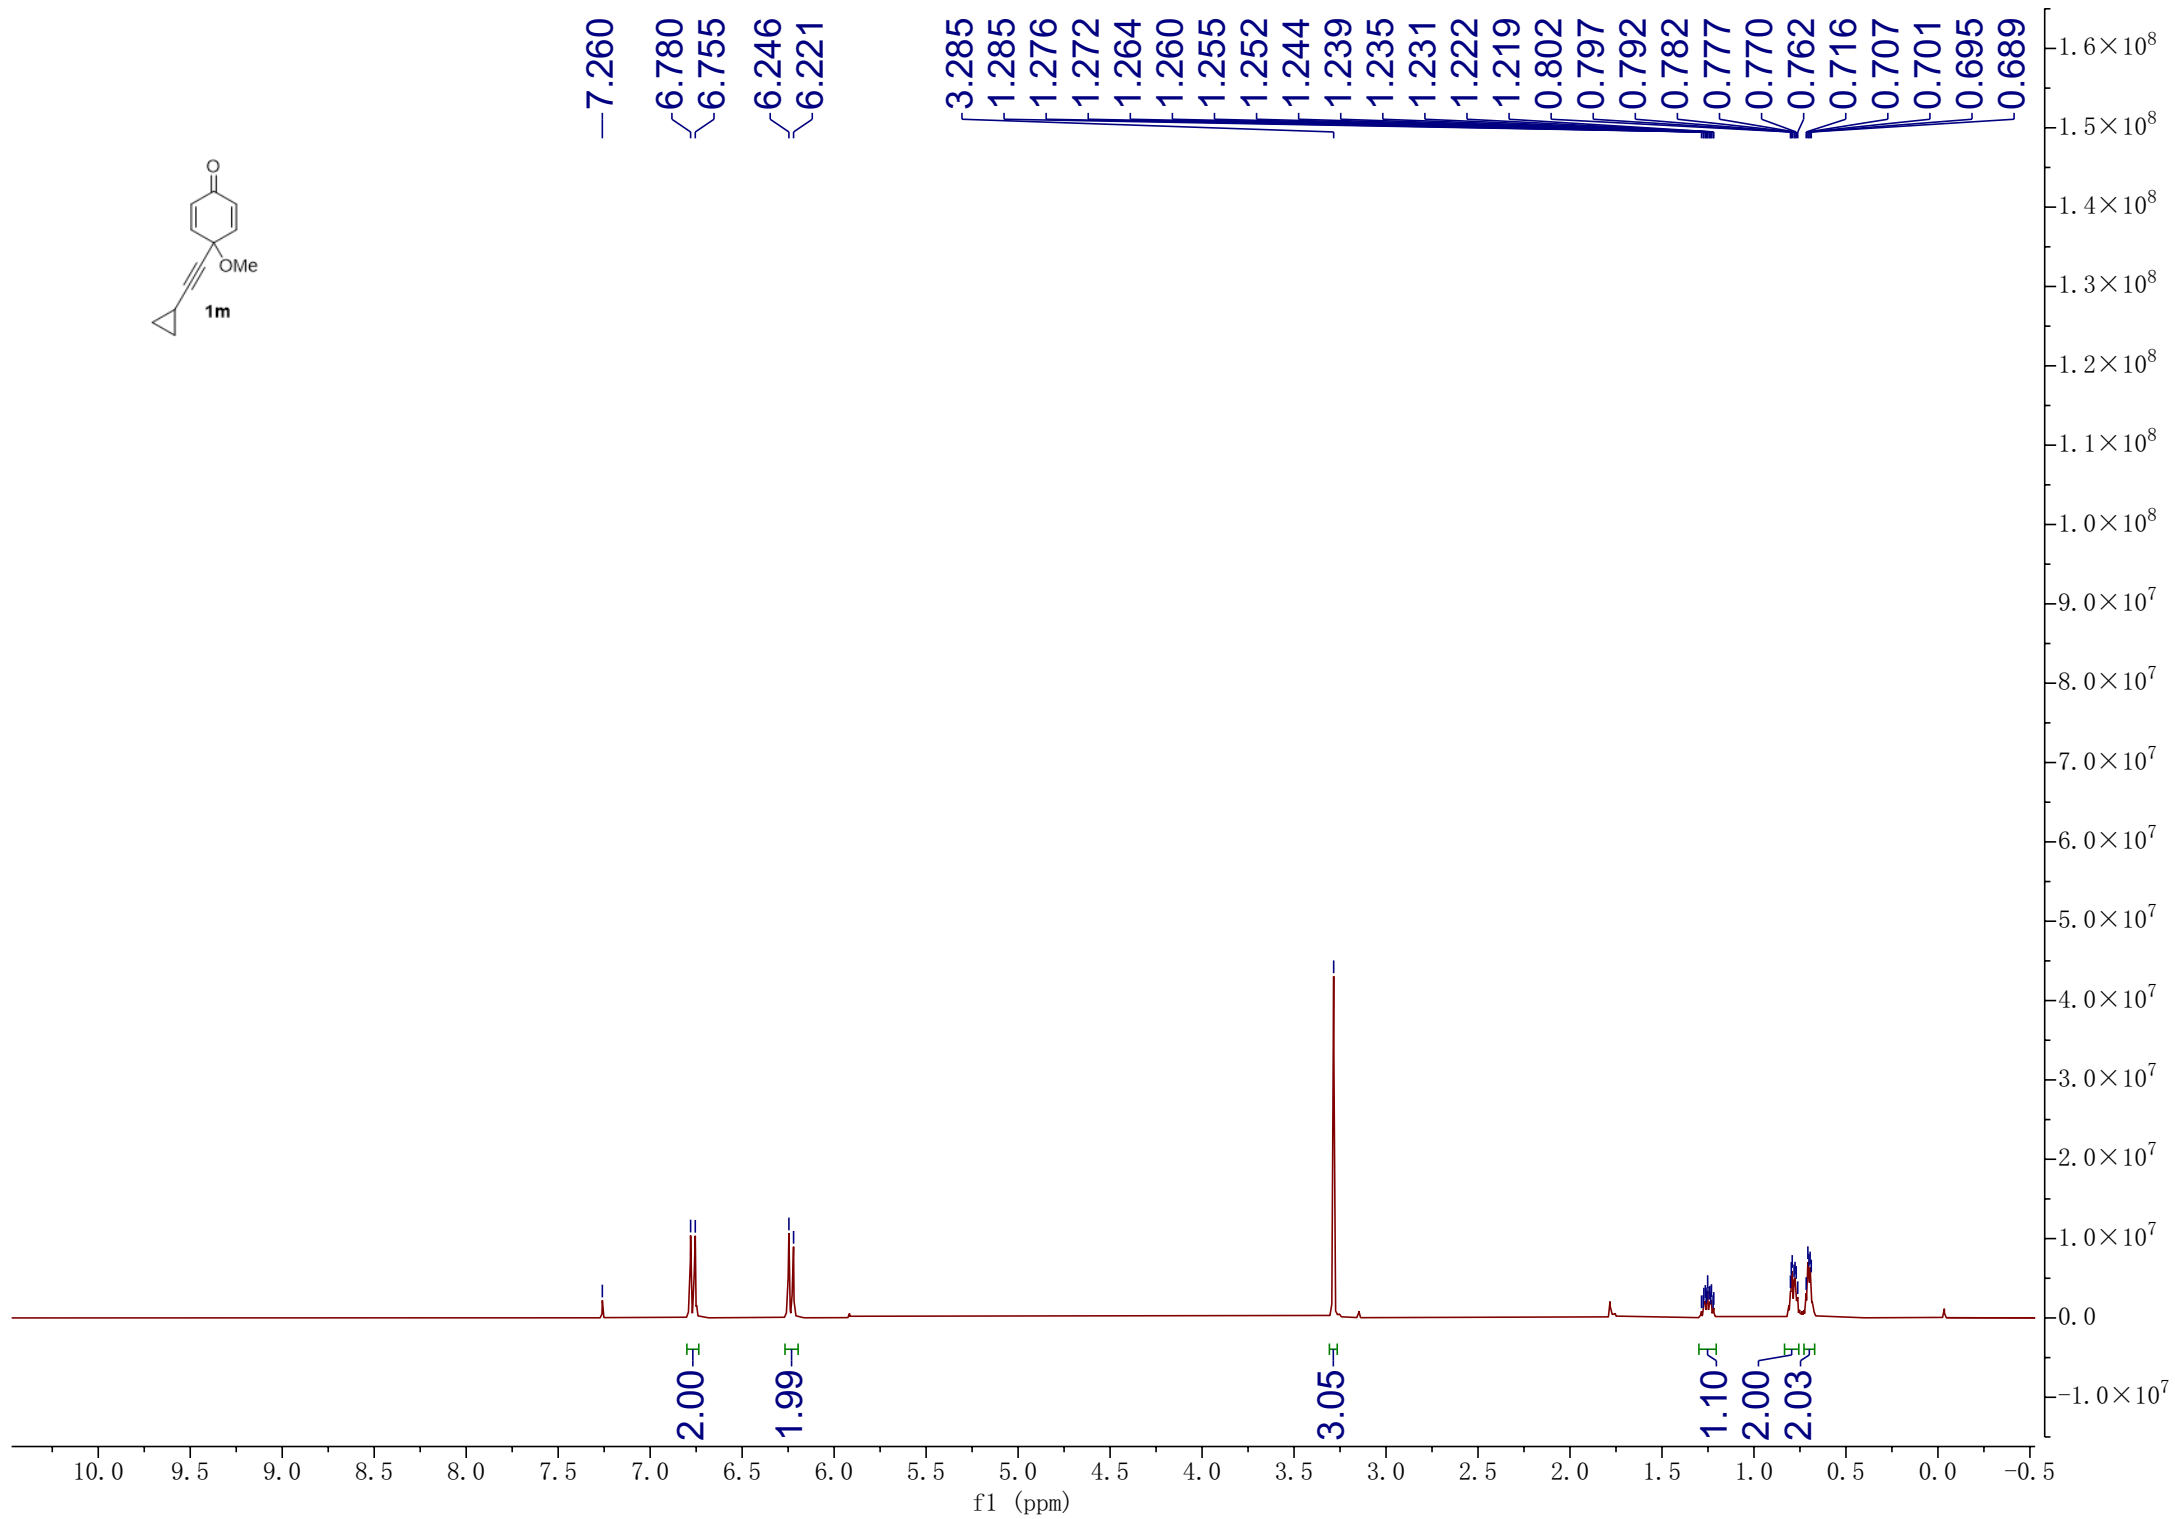



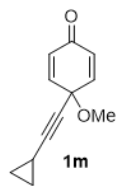

—184.89

—145.95

—128.94

—91.71

77.55

77.23

76.91

69.93

67.77

—52.19

—8.69

—0.37

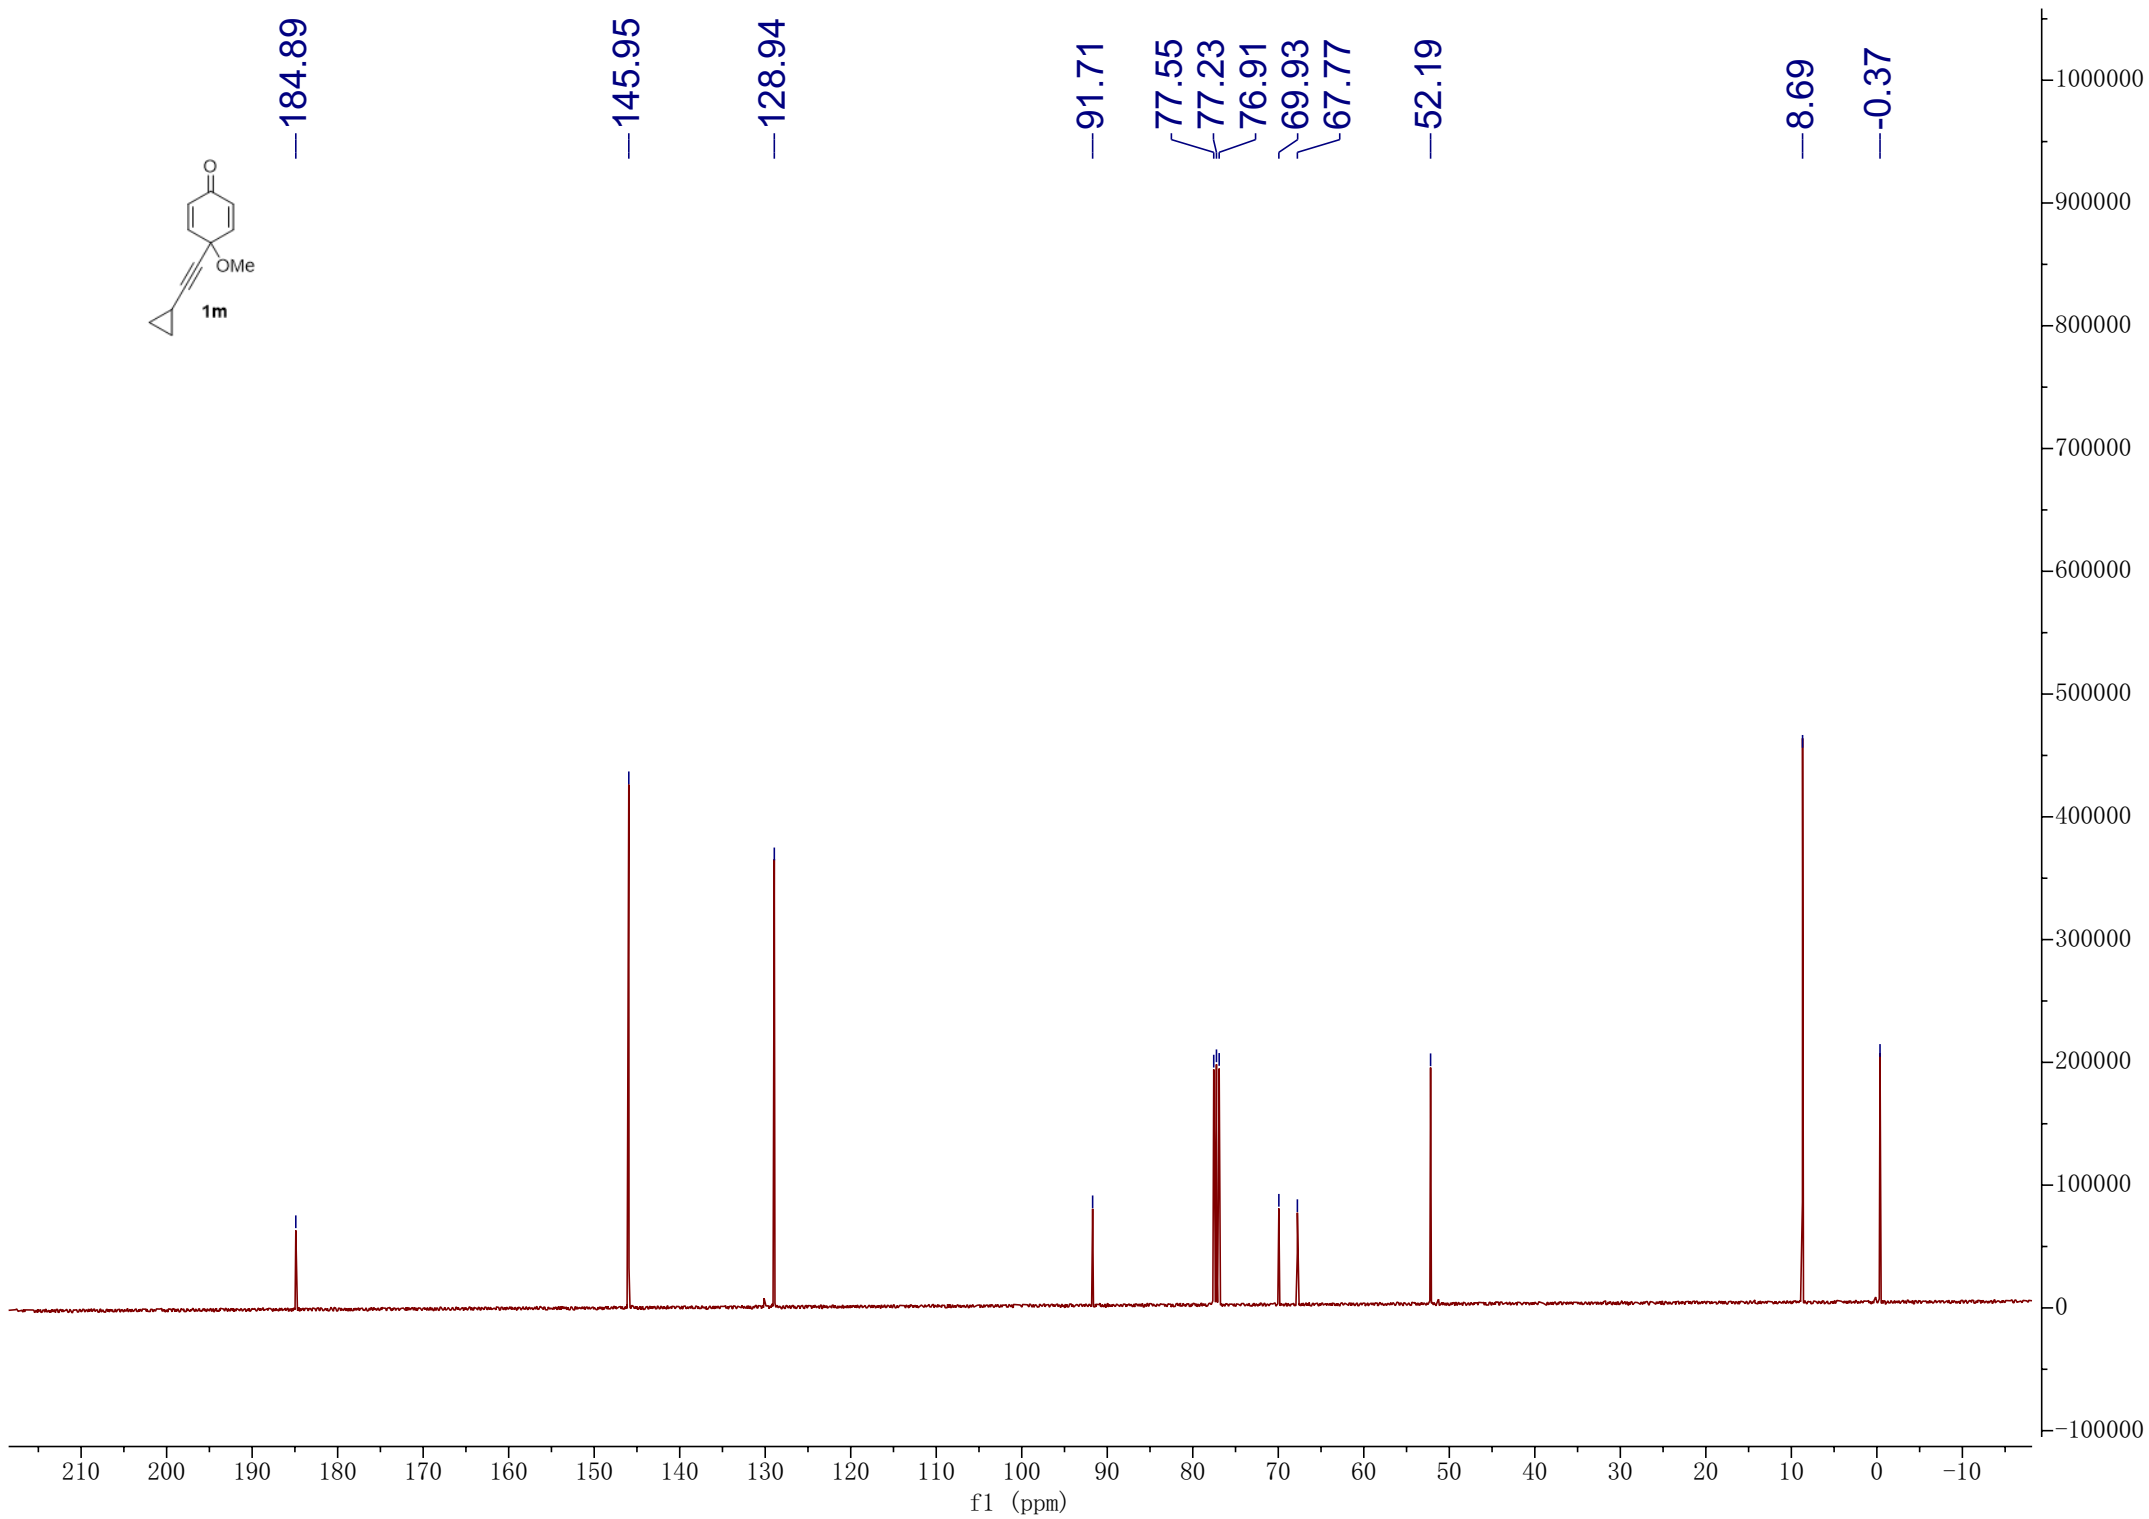

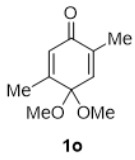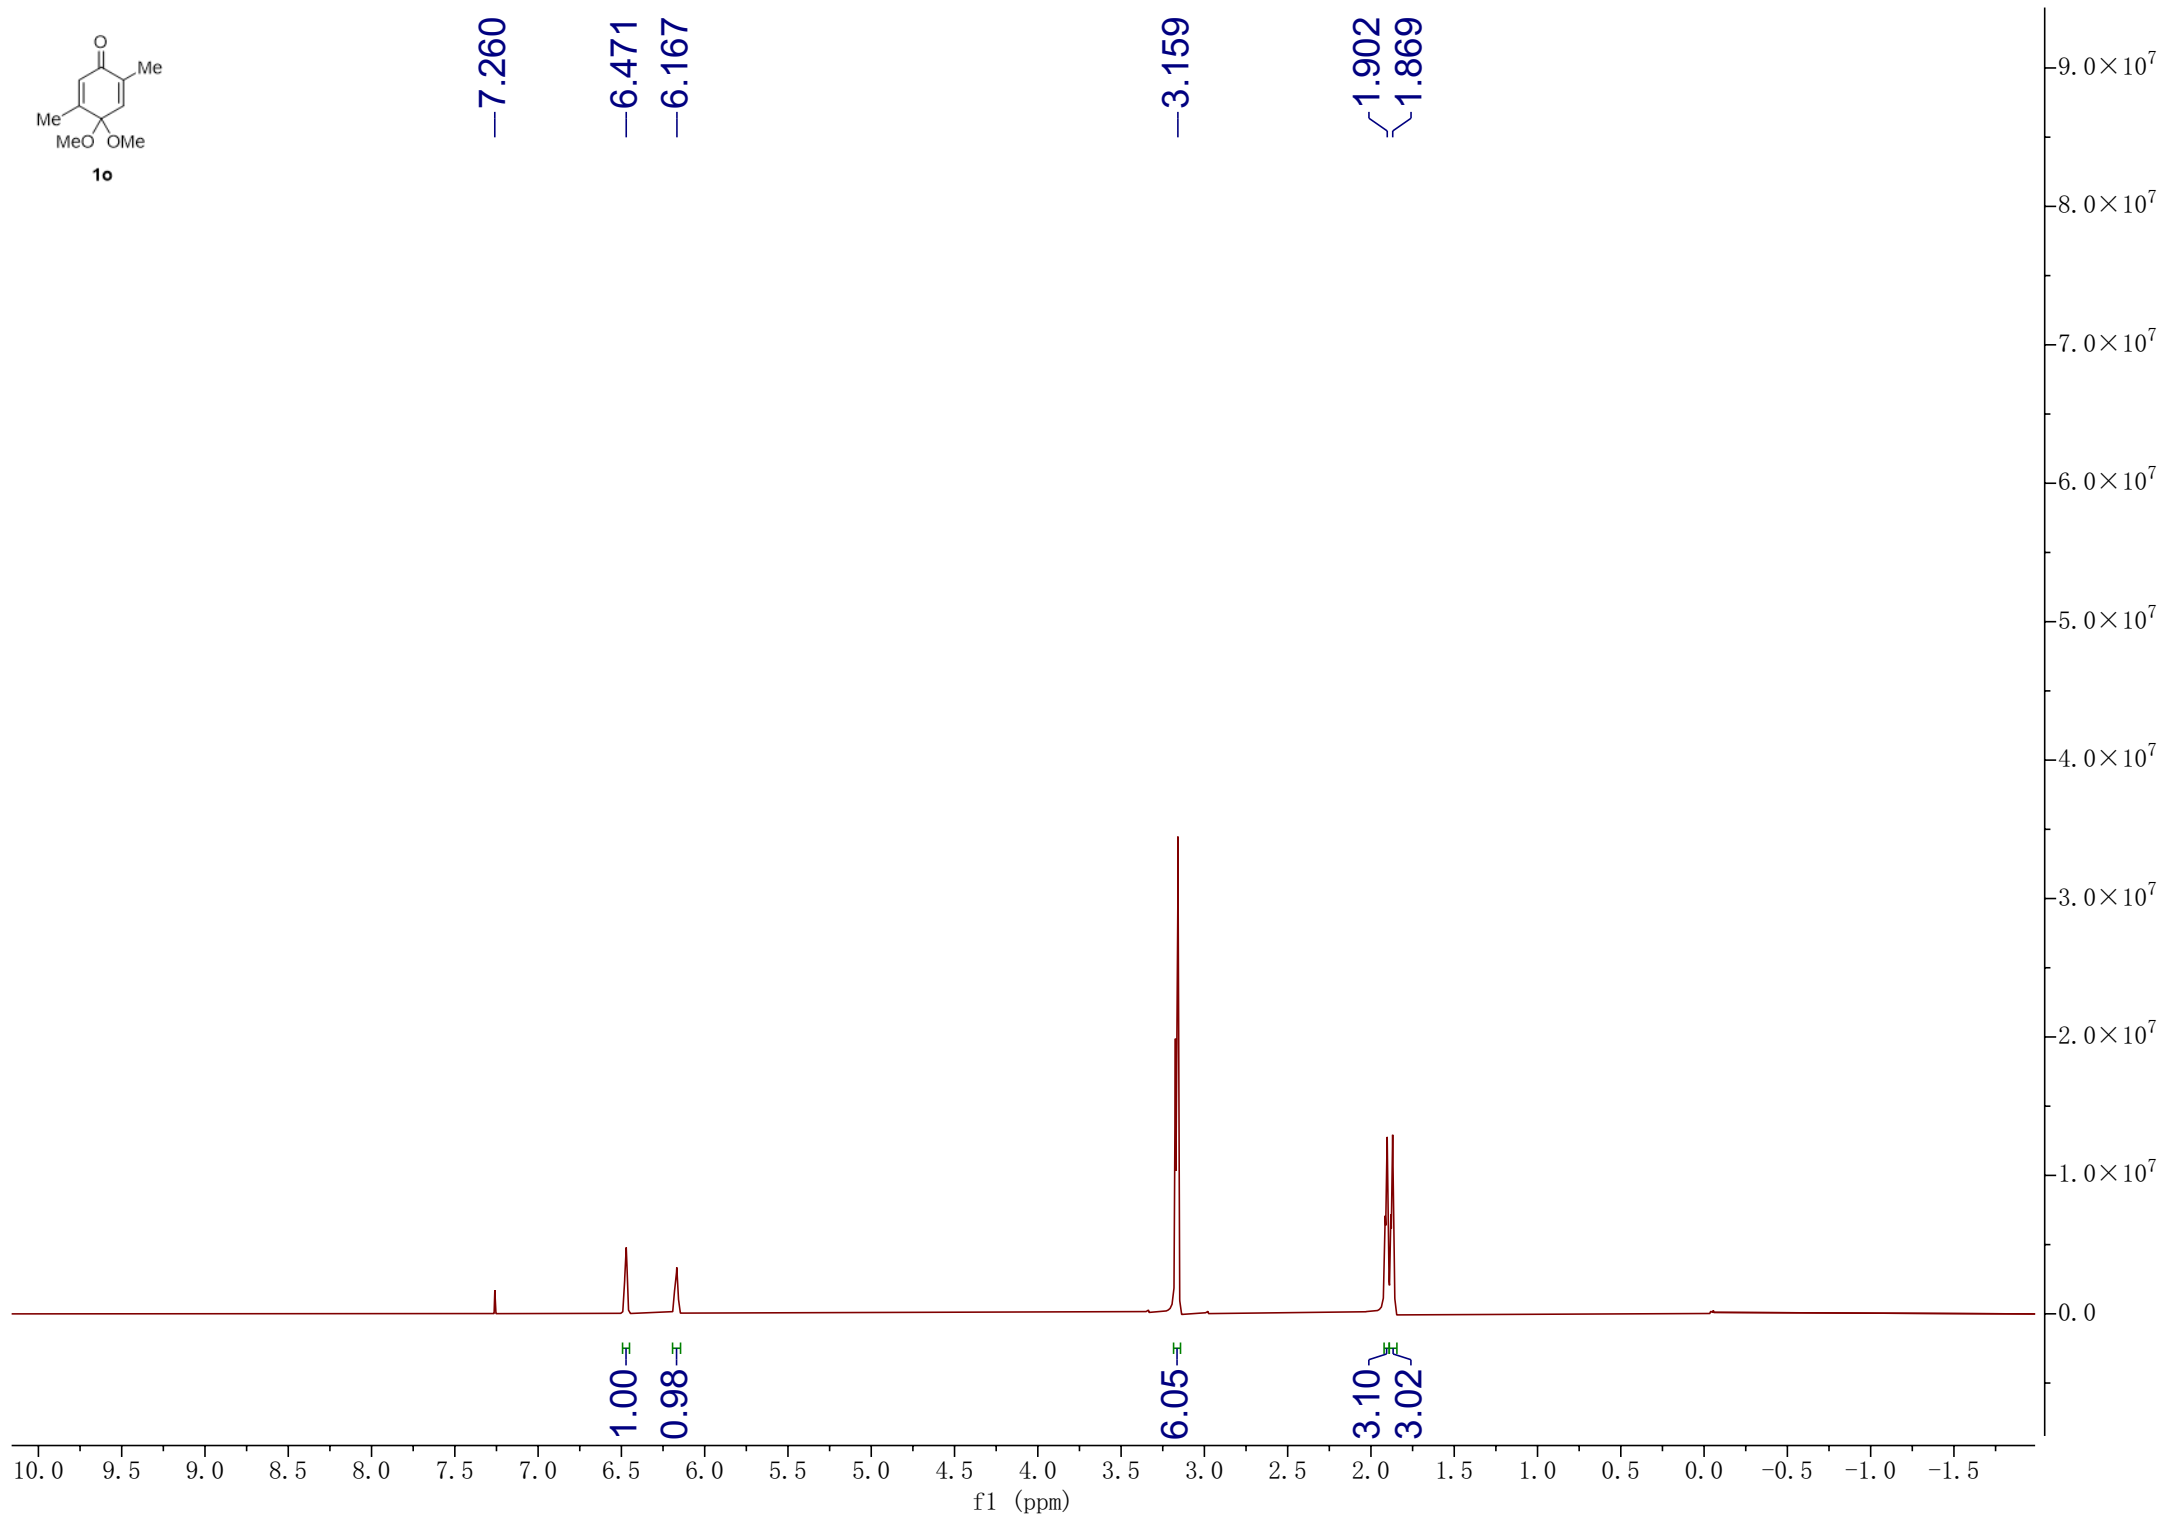



— 185.81

— 155.85

— 139.56

— 139.22

— 129.95

— 96.07

— 77.55

— 77.23

— 76.91

— 51.00

— 16.44

— 15.51

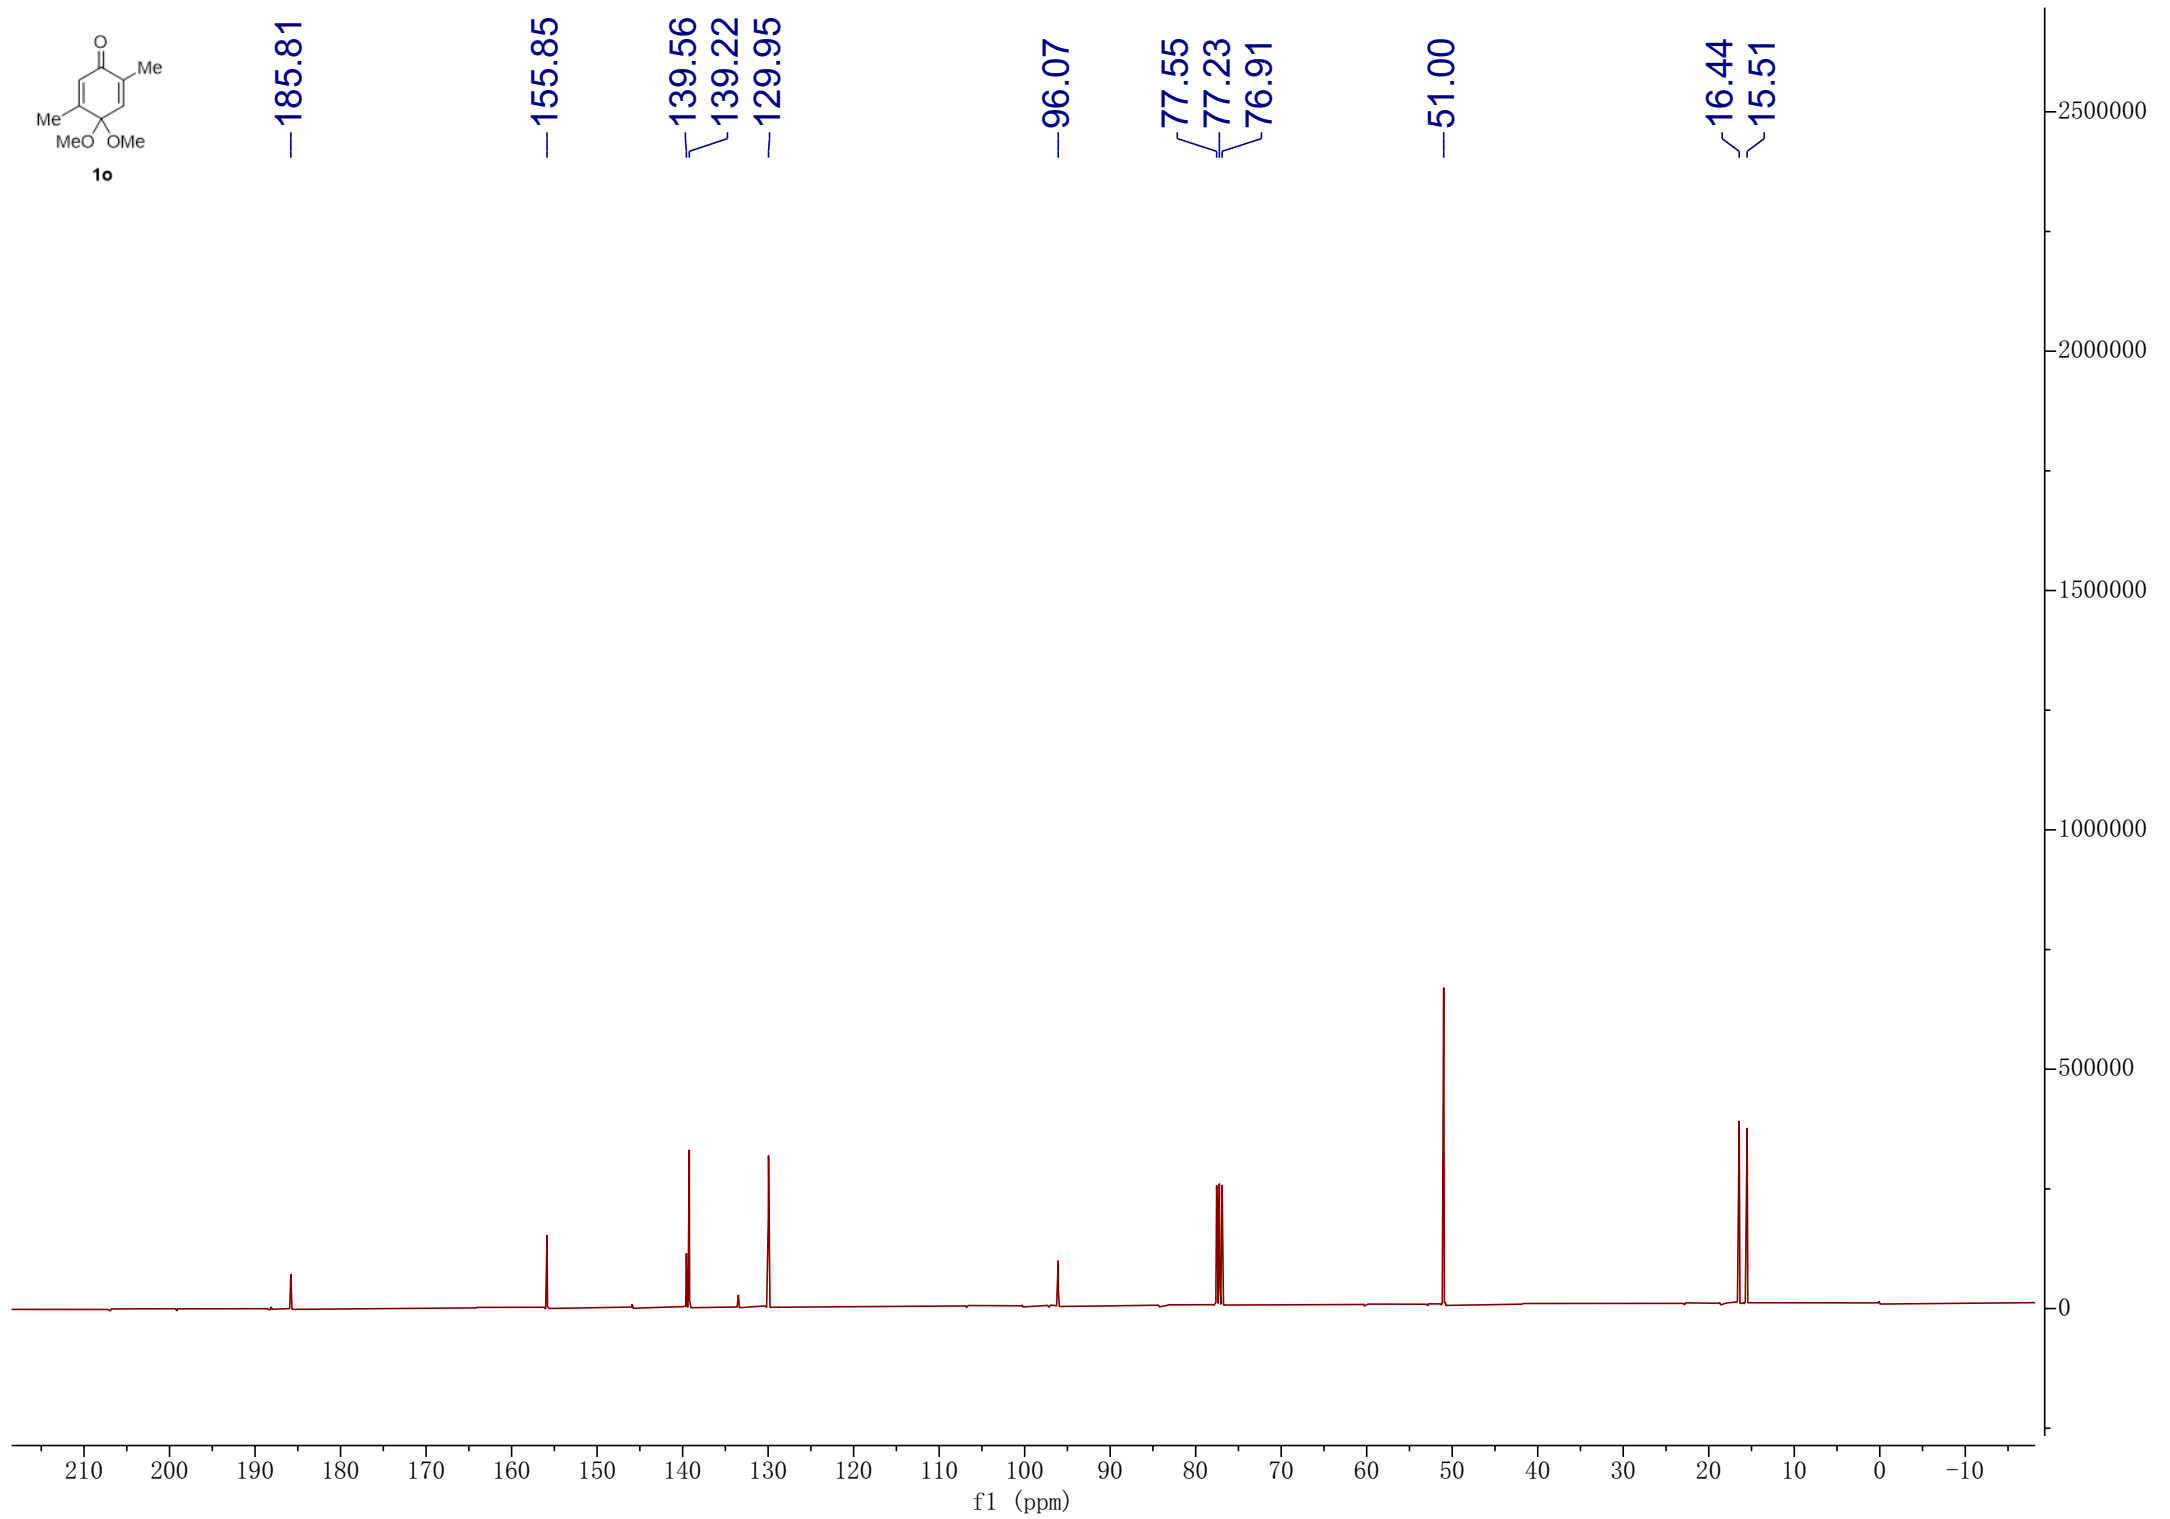

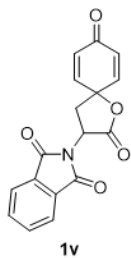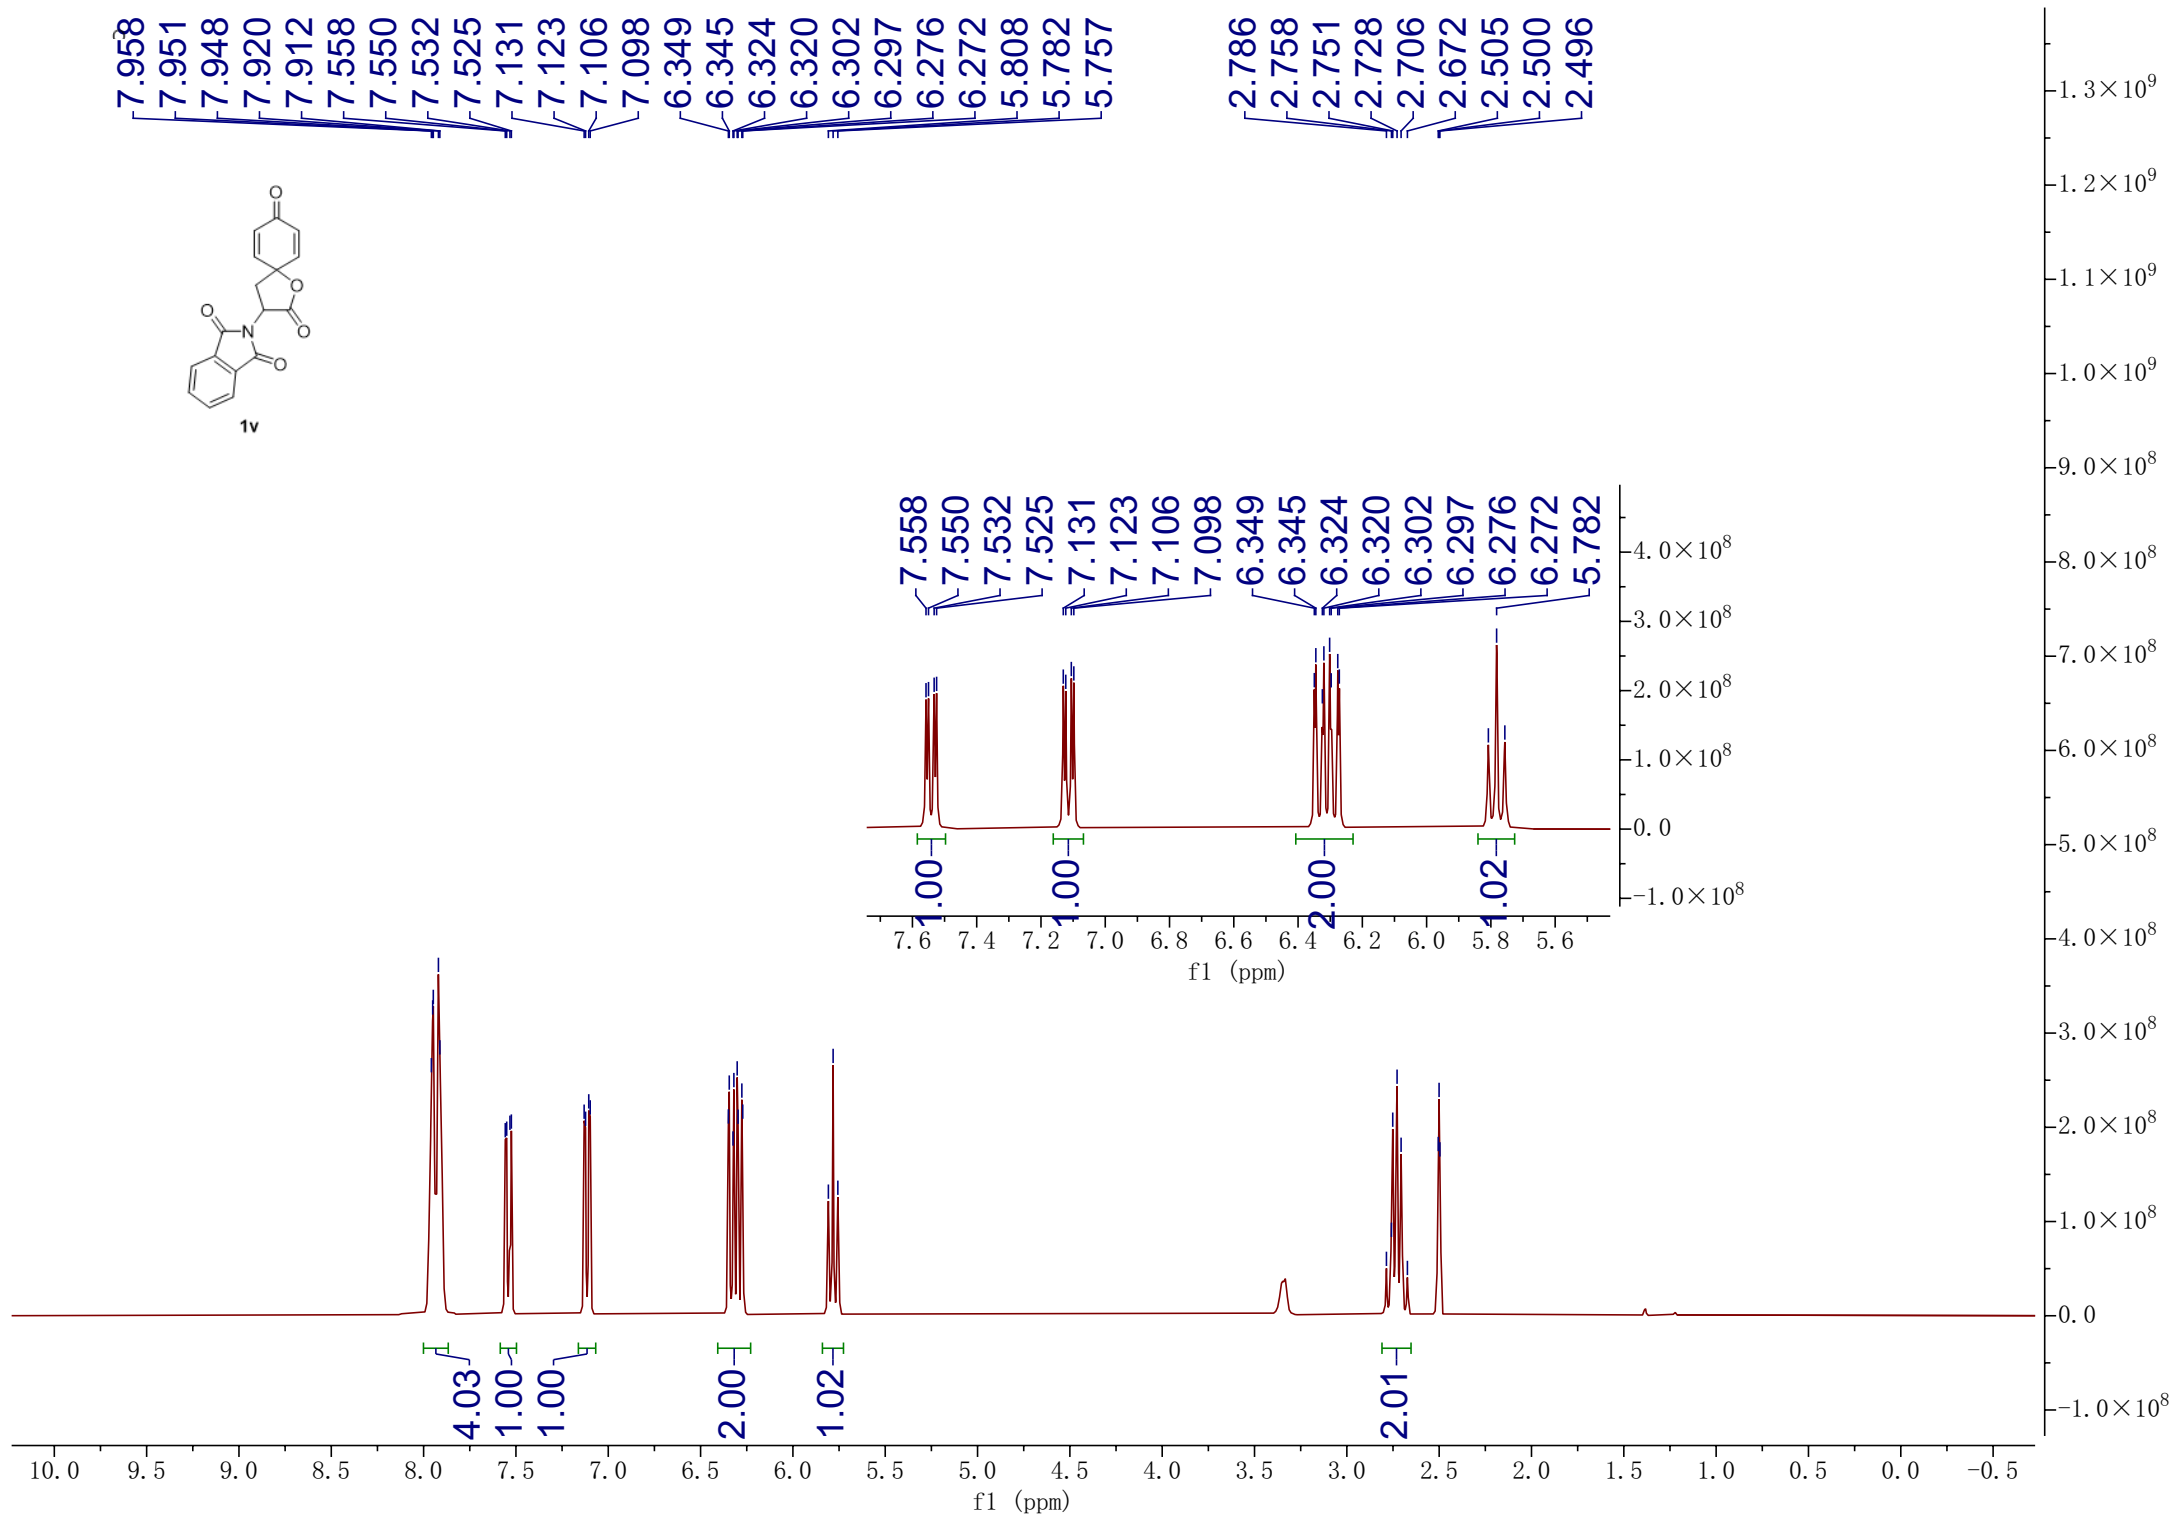

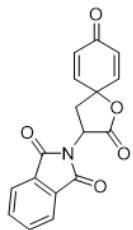

1v

— 184.04

— 171.94

— 166.64

{ 146.88

{ 146.56

{ 135.06

{ 131.12

{ 129.00

{ 127.71

{ 123.62

— 76.36

~ 46.99

~ 39.52

~ 34.19

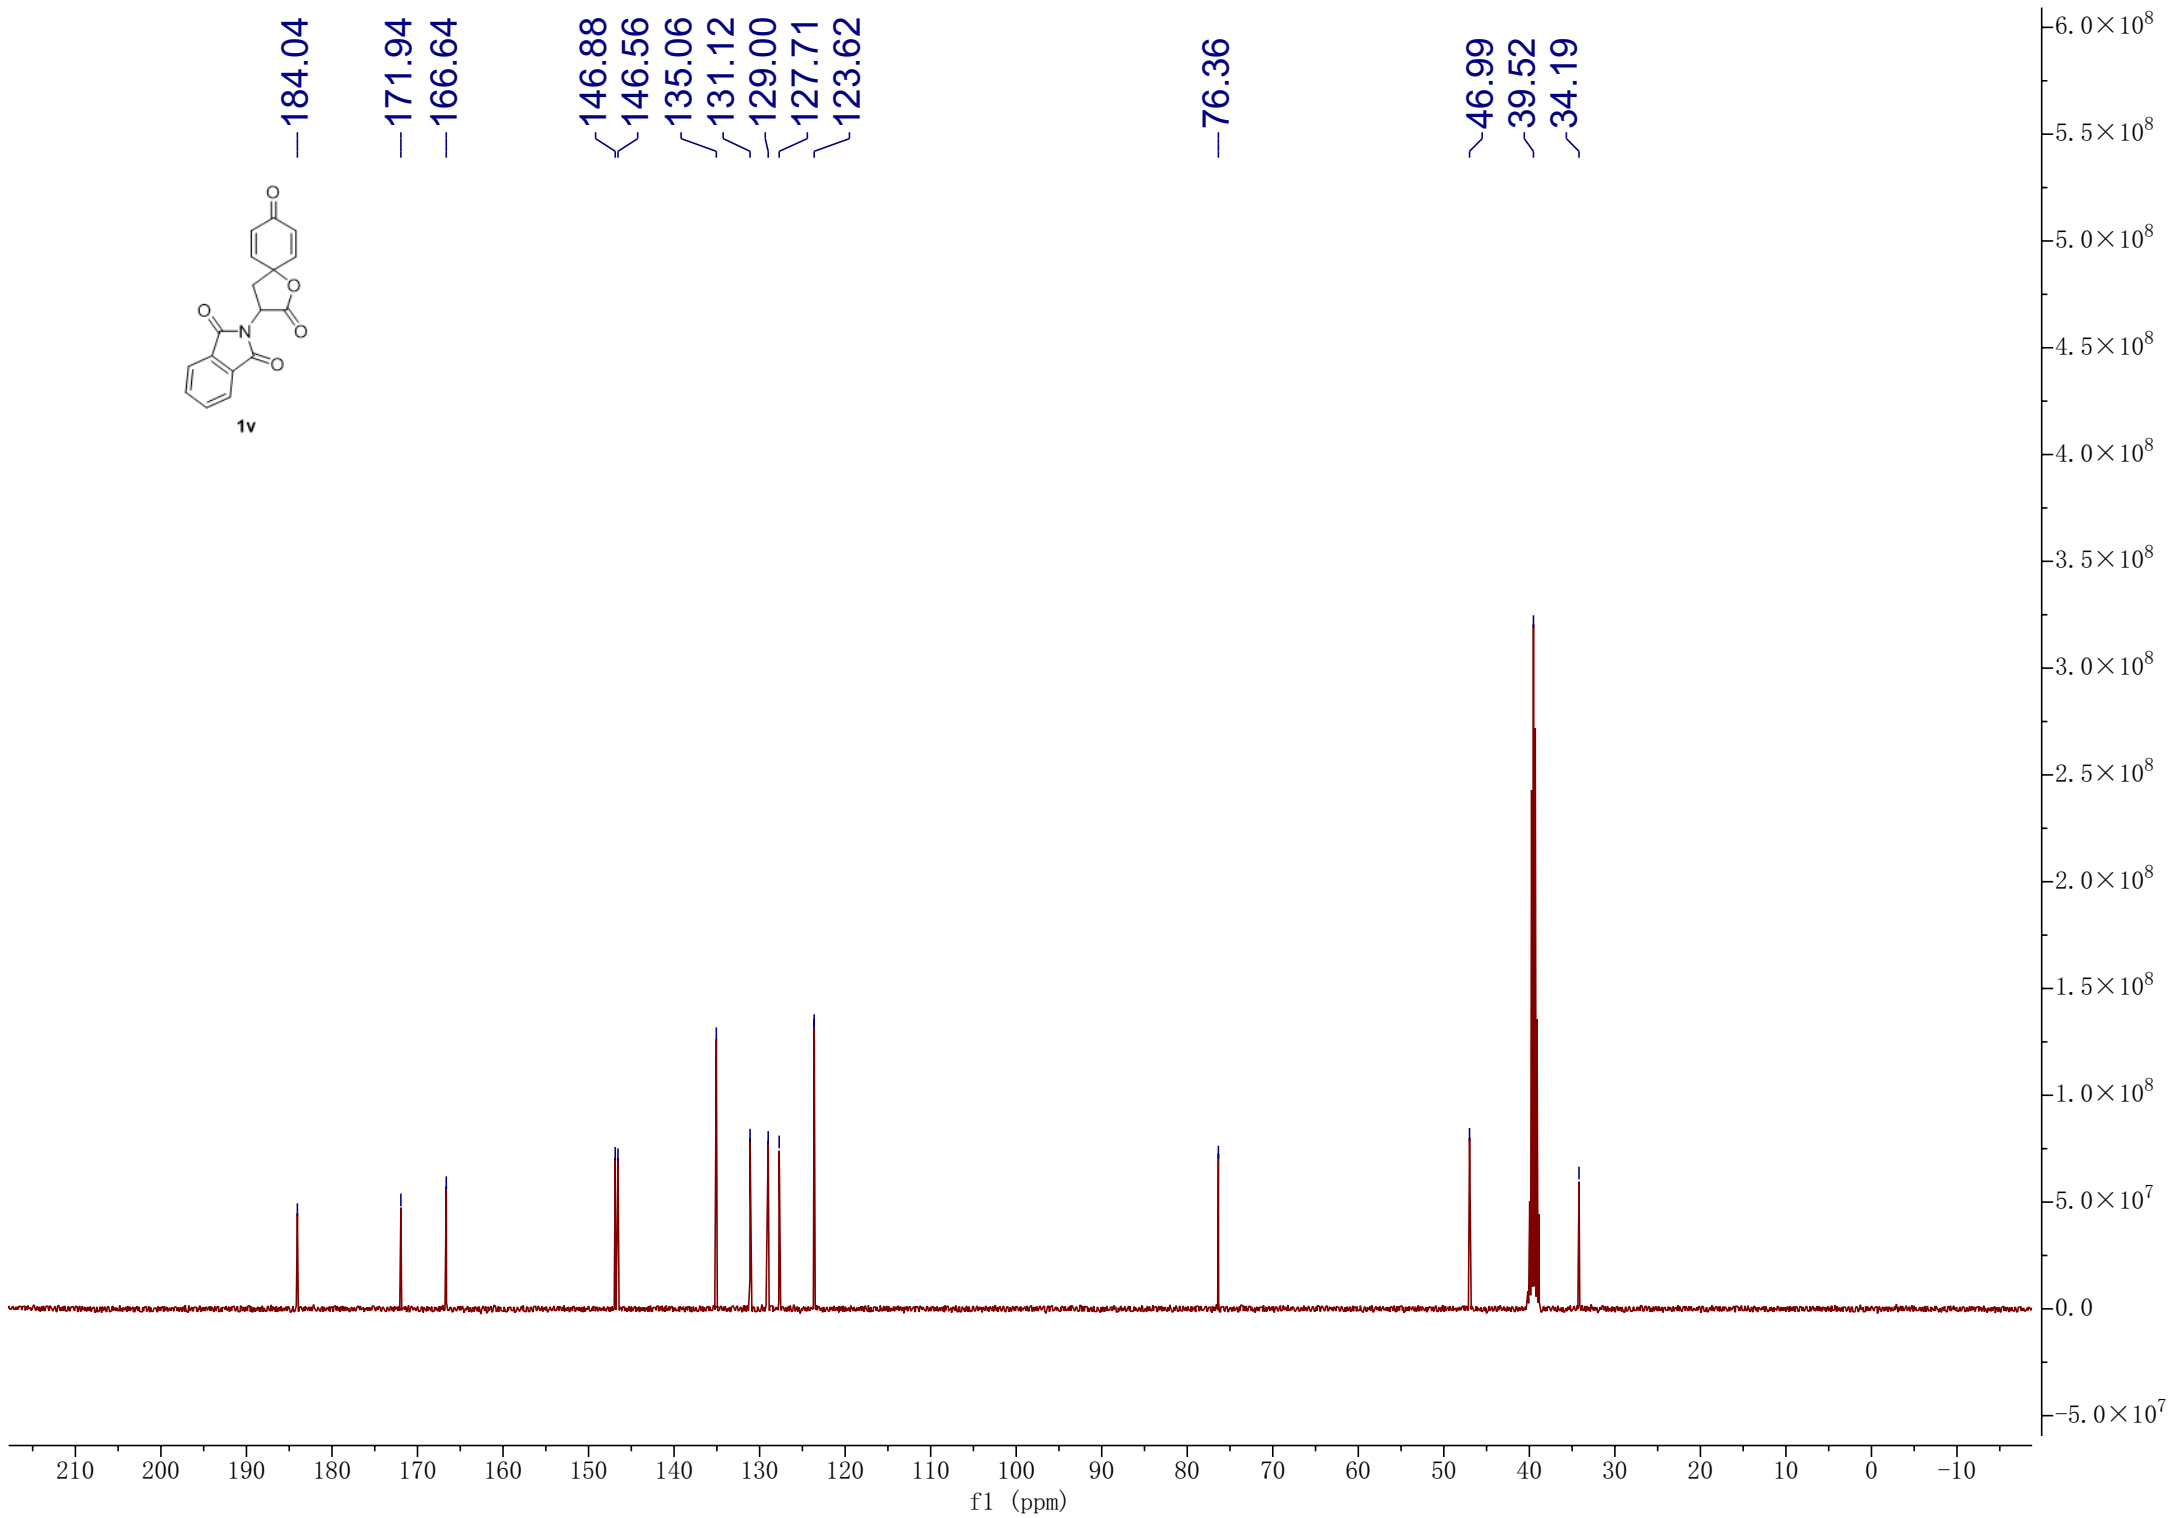

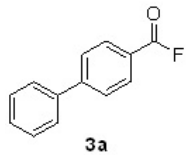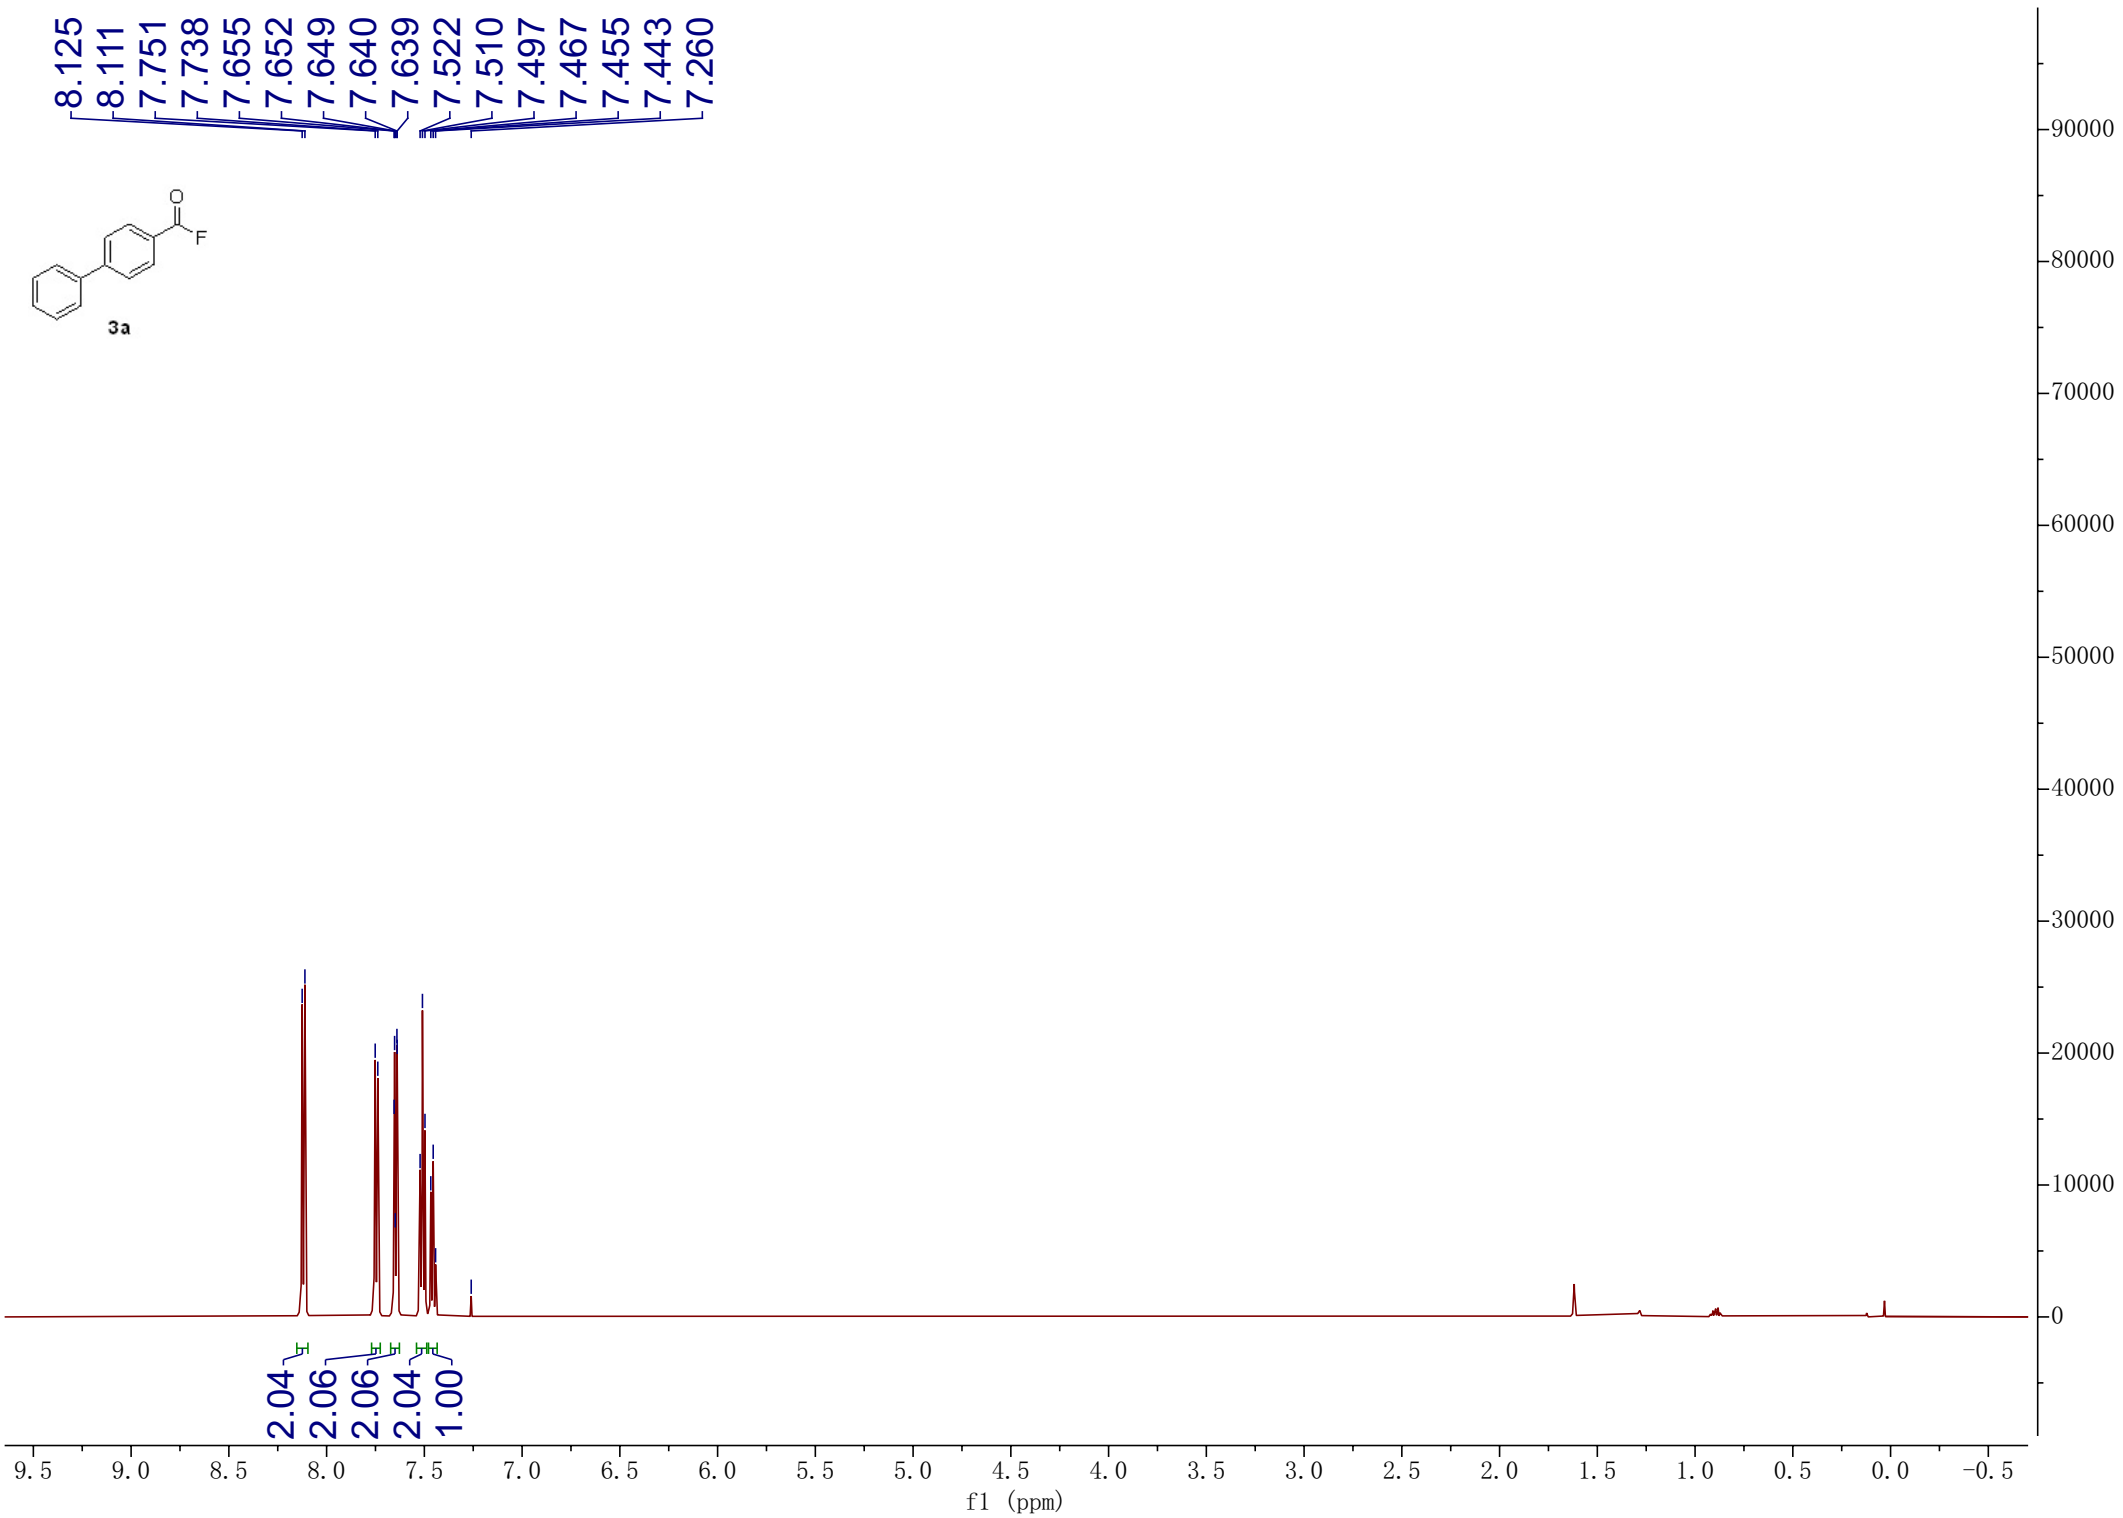

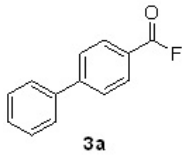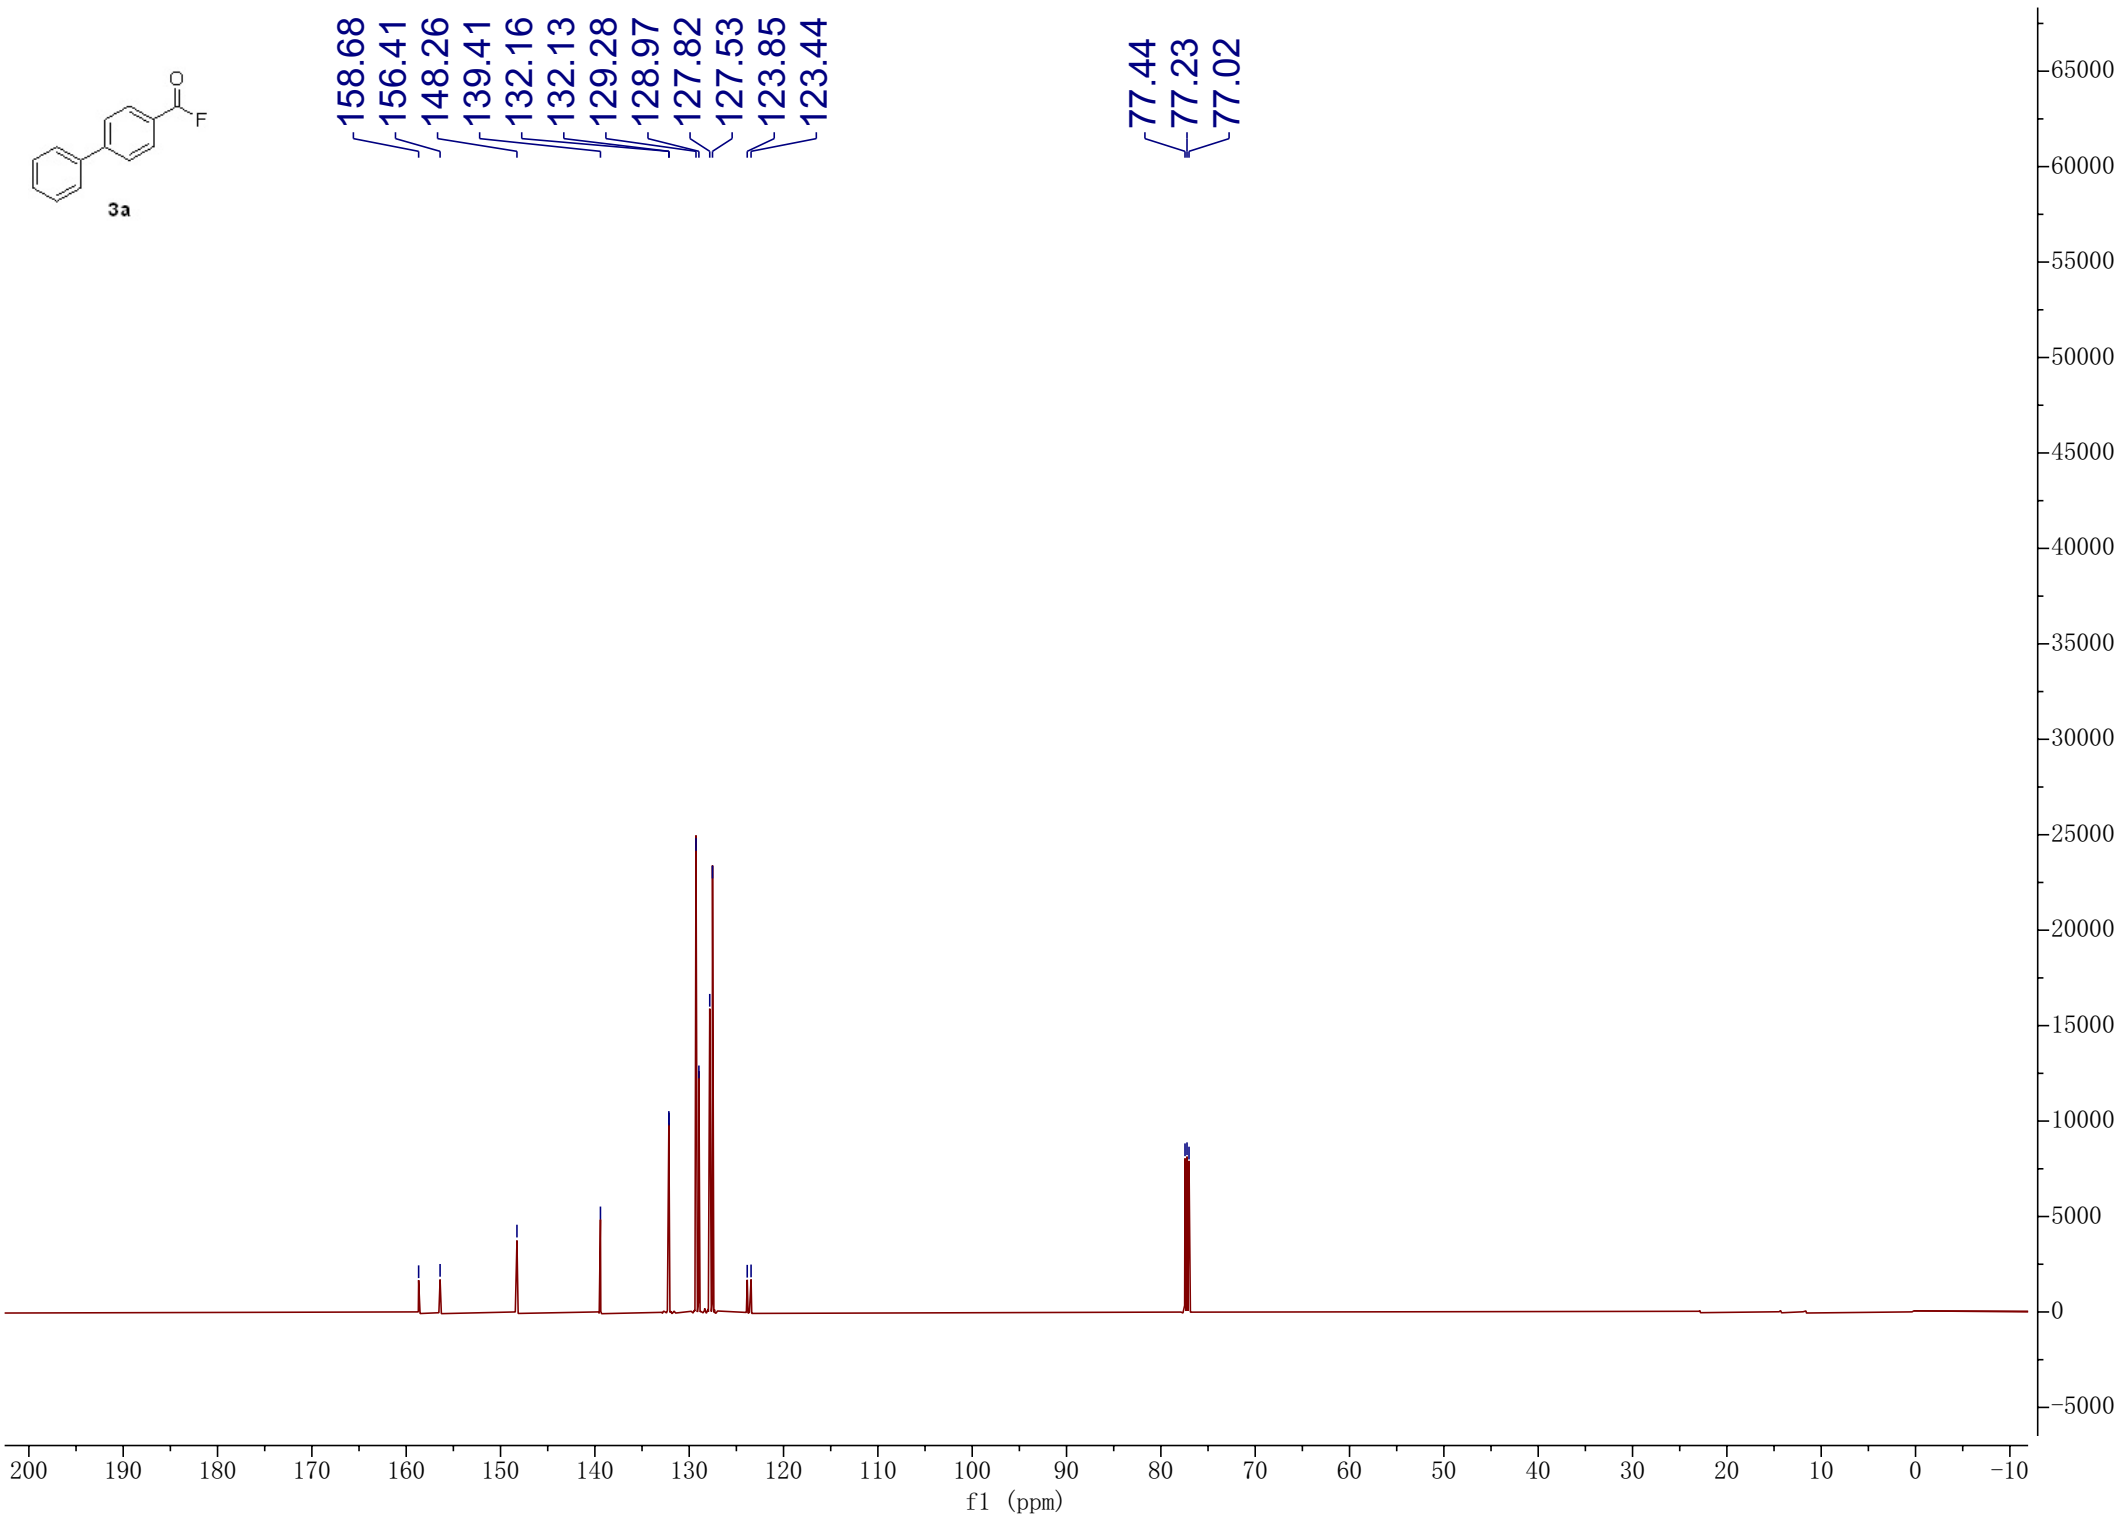

—18.134

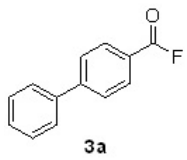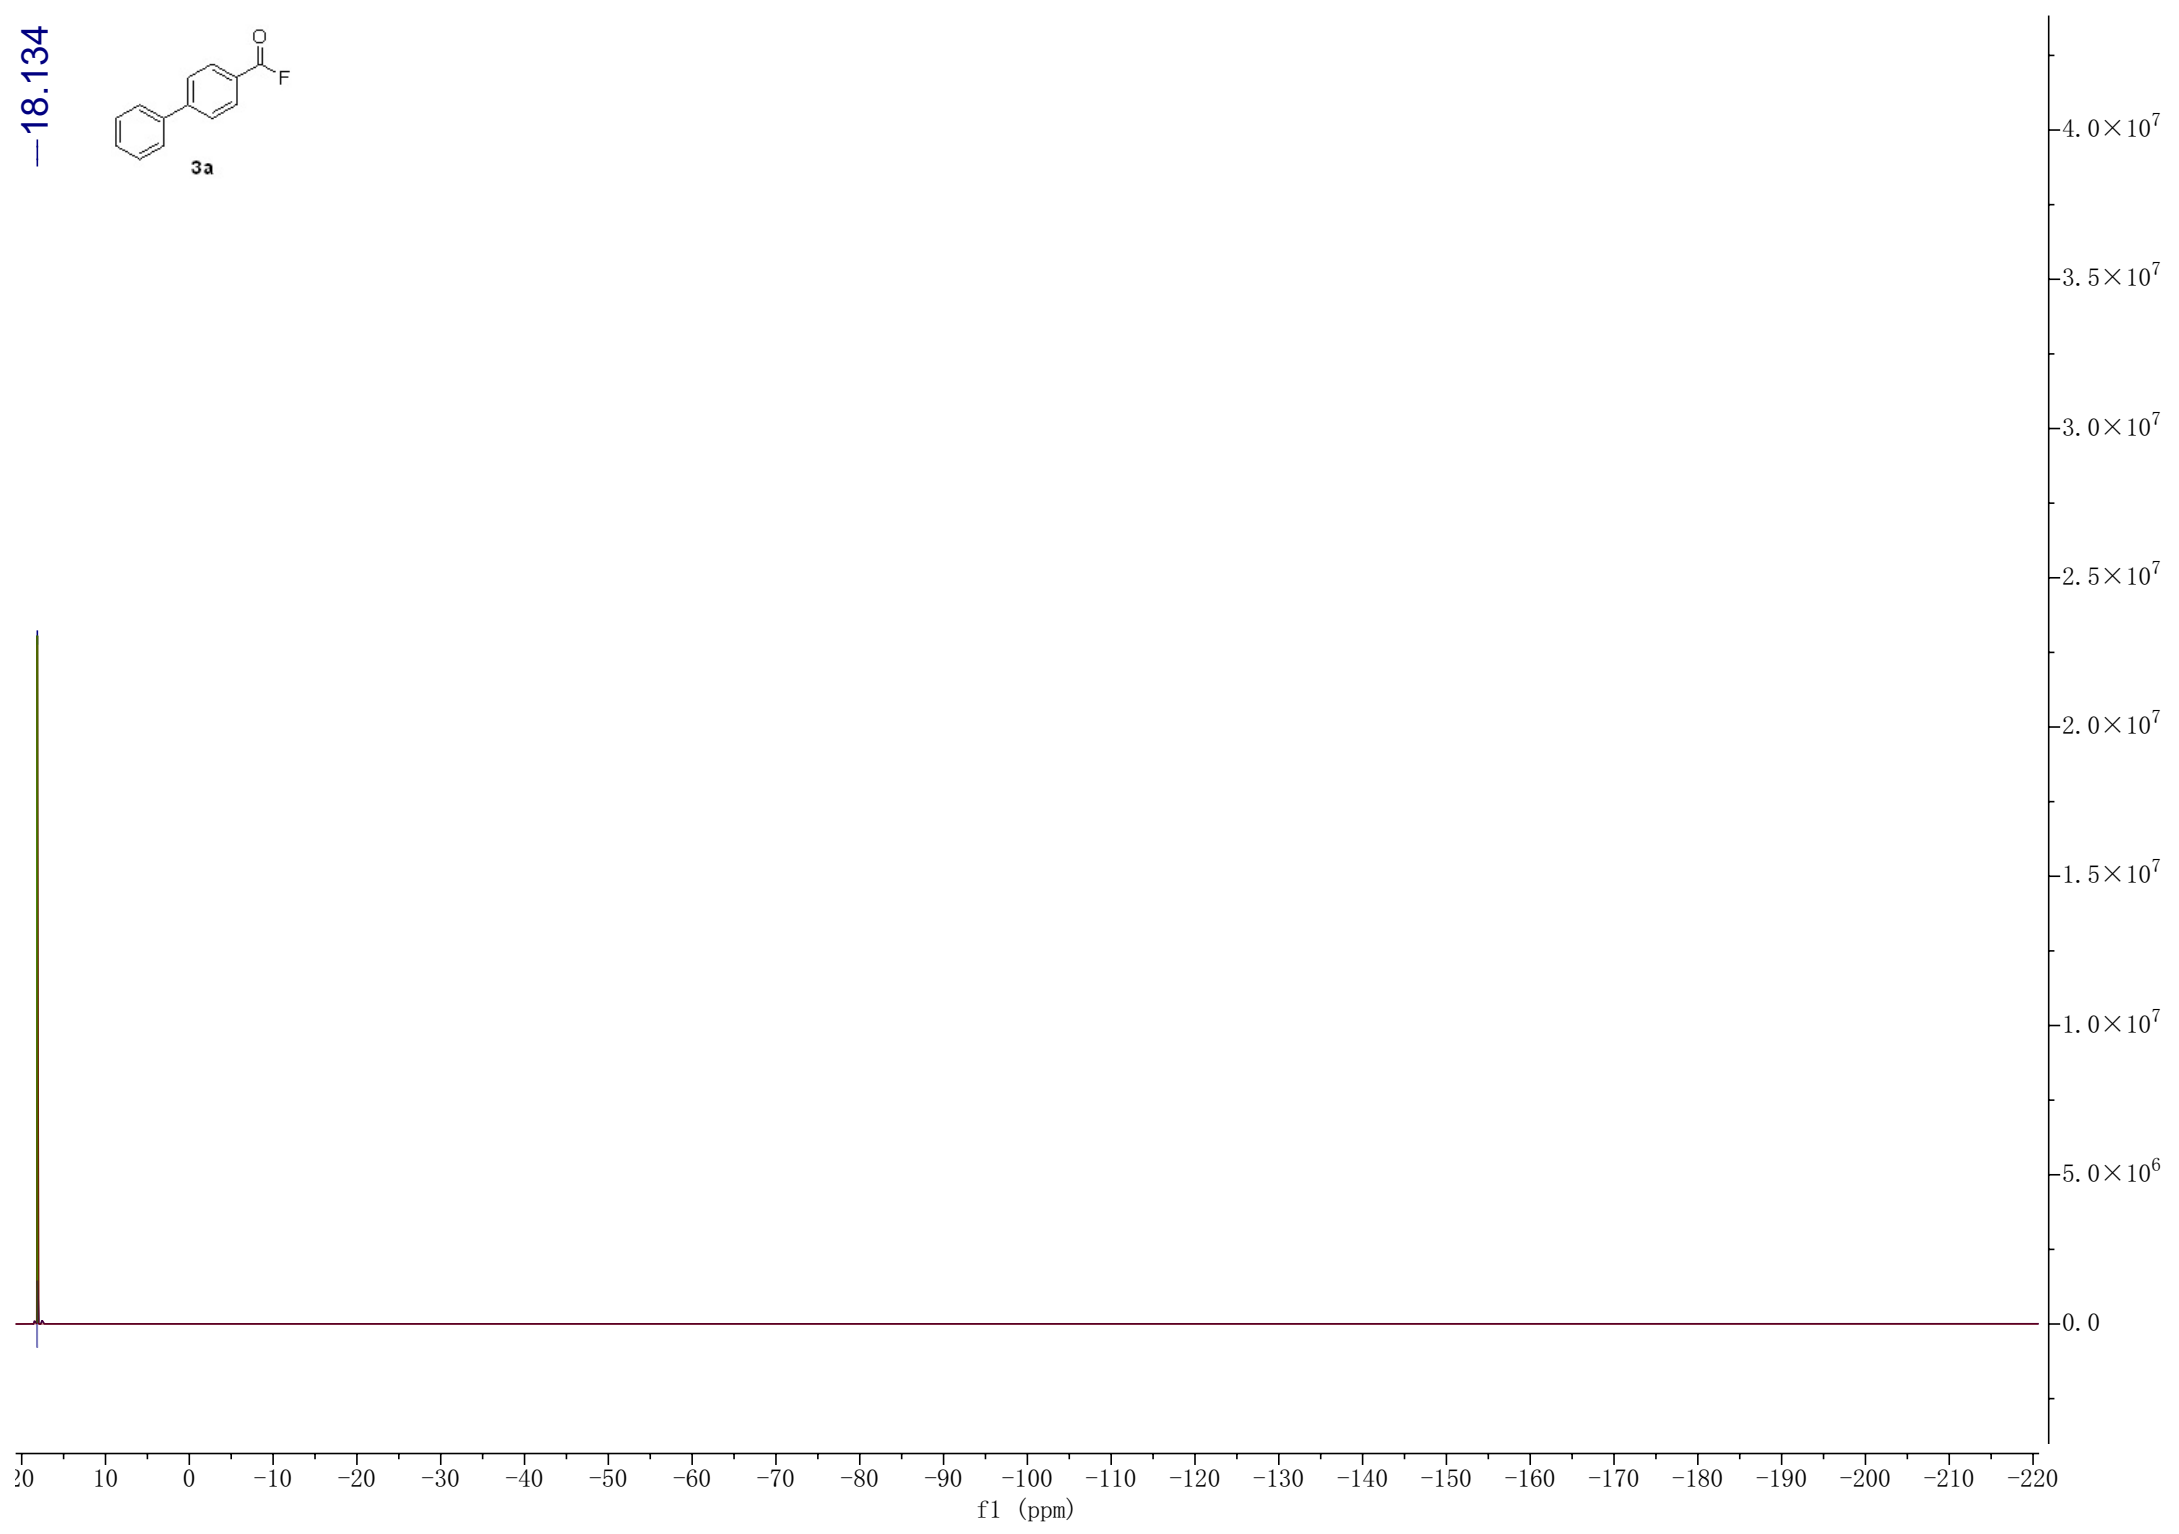



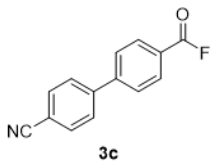

8.163  
8.150  
7.796  
7.782  
7.753  
7.743  
7.739  
7.729  
7.260

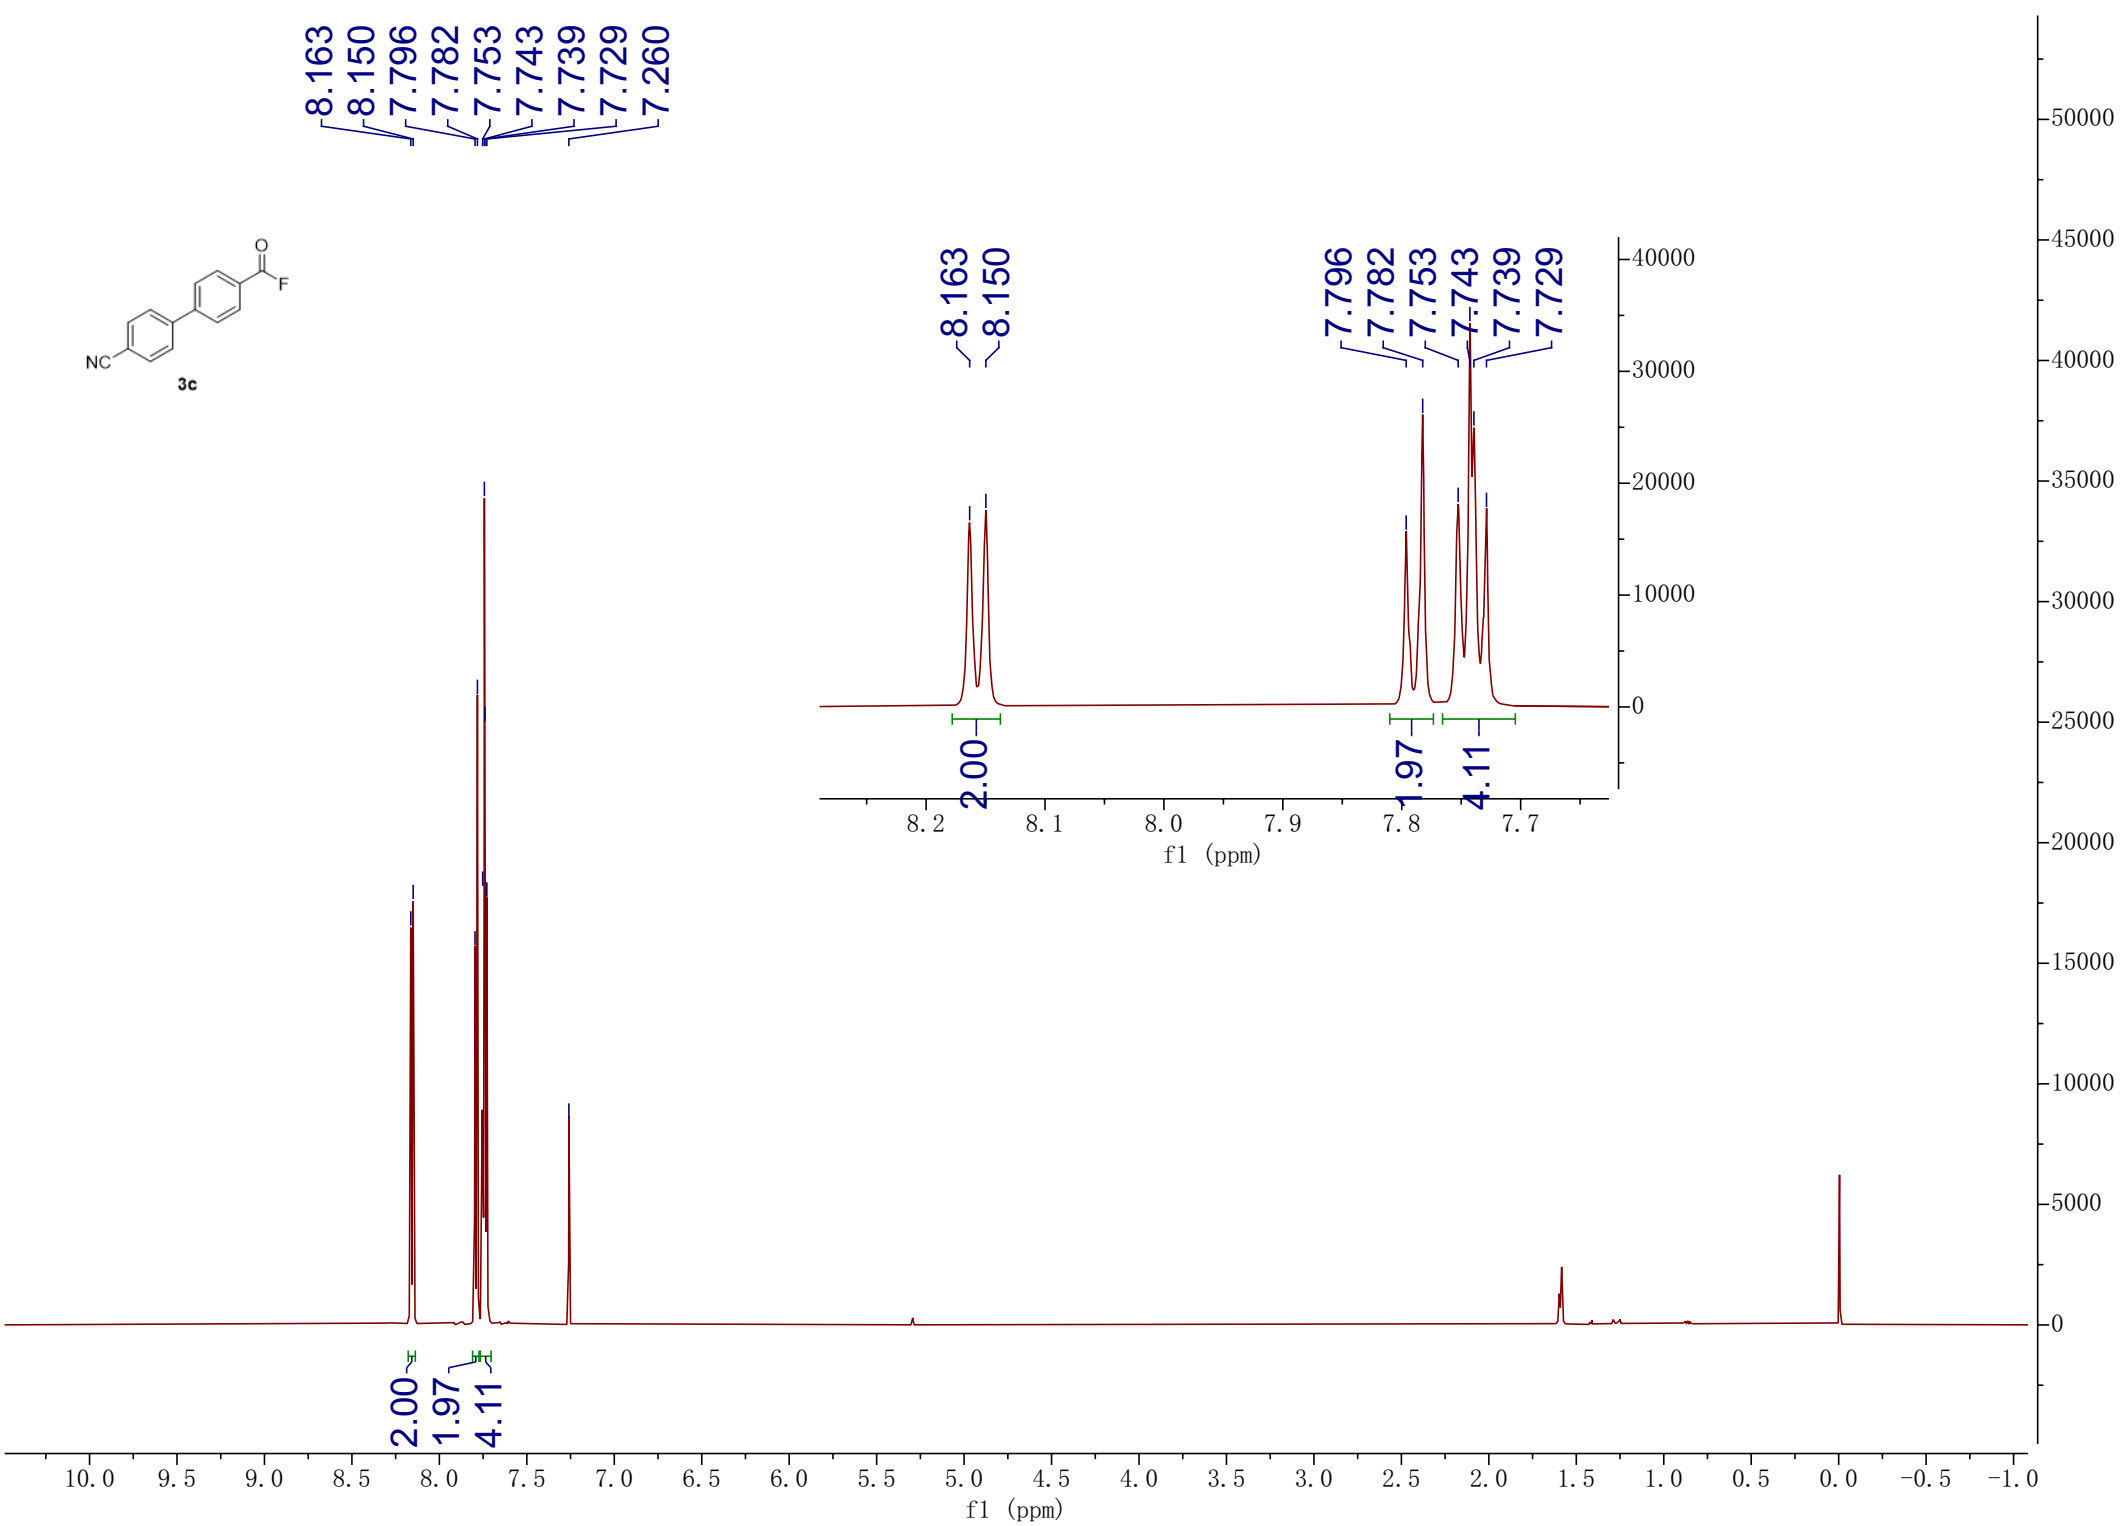

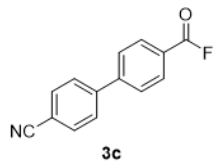

158.28  
156.00  
146.06  
143.84  
133.06  
132.39  
132.37  
128.27  
128.10  
125.28  
124.87  
118.62  
112.72

77.44  
77.23  
77.02

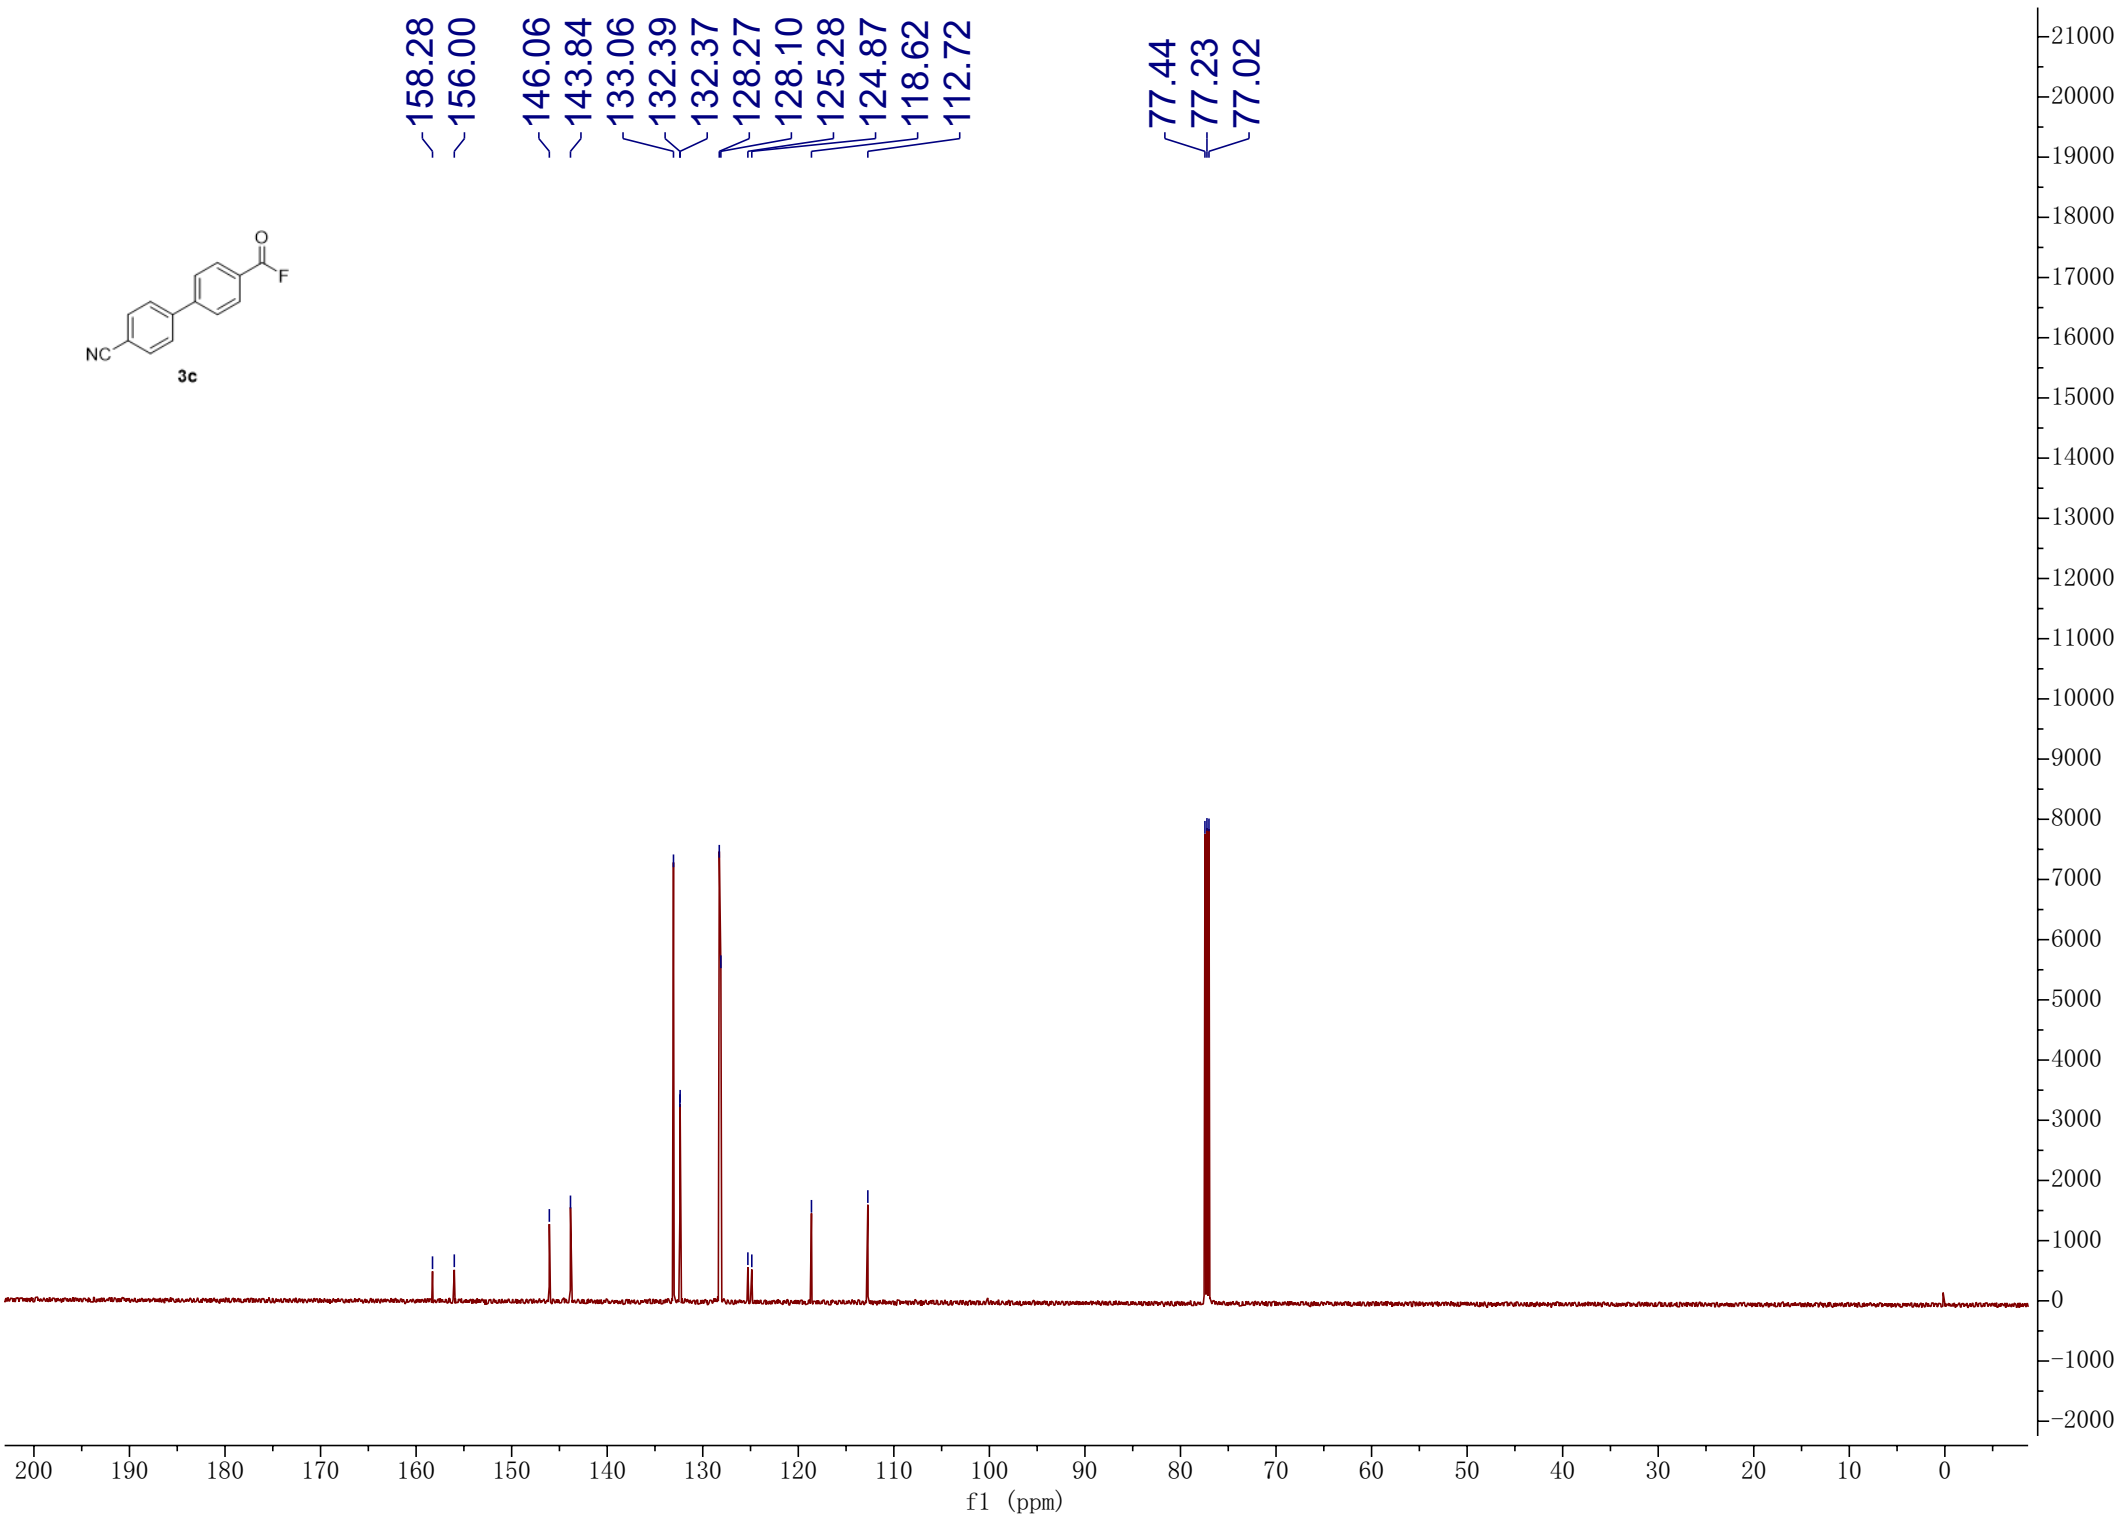

—18.799

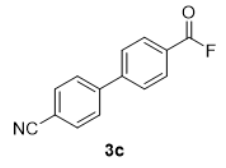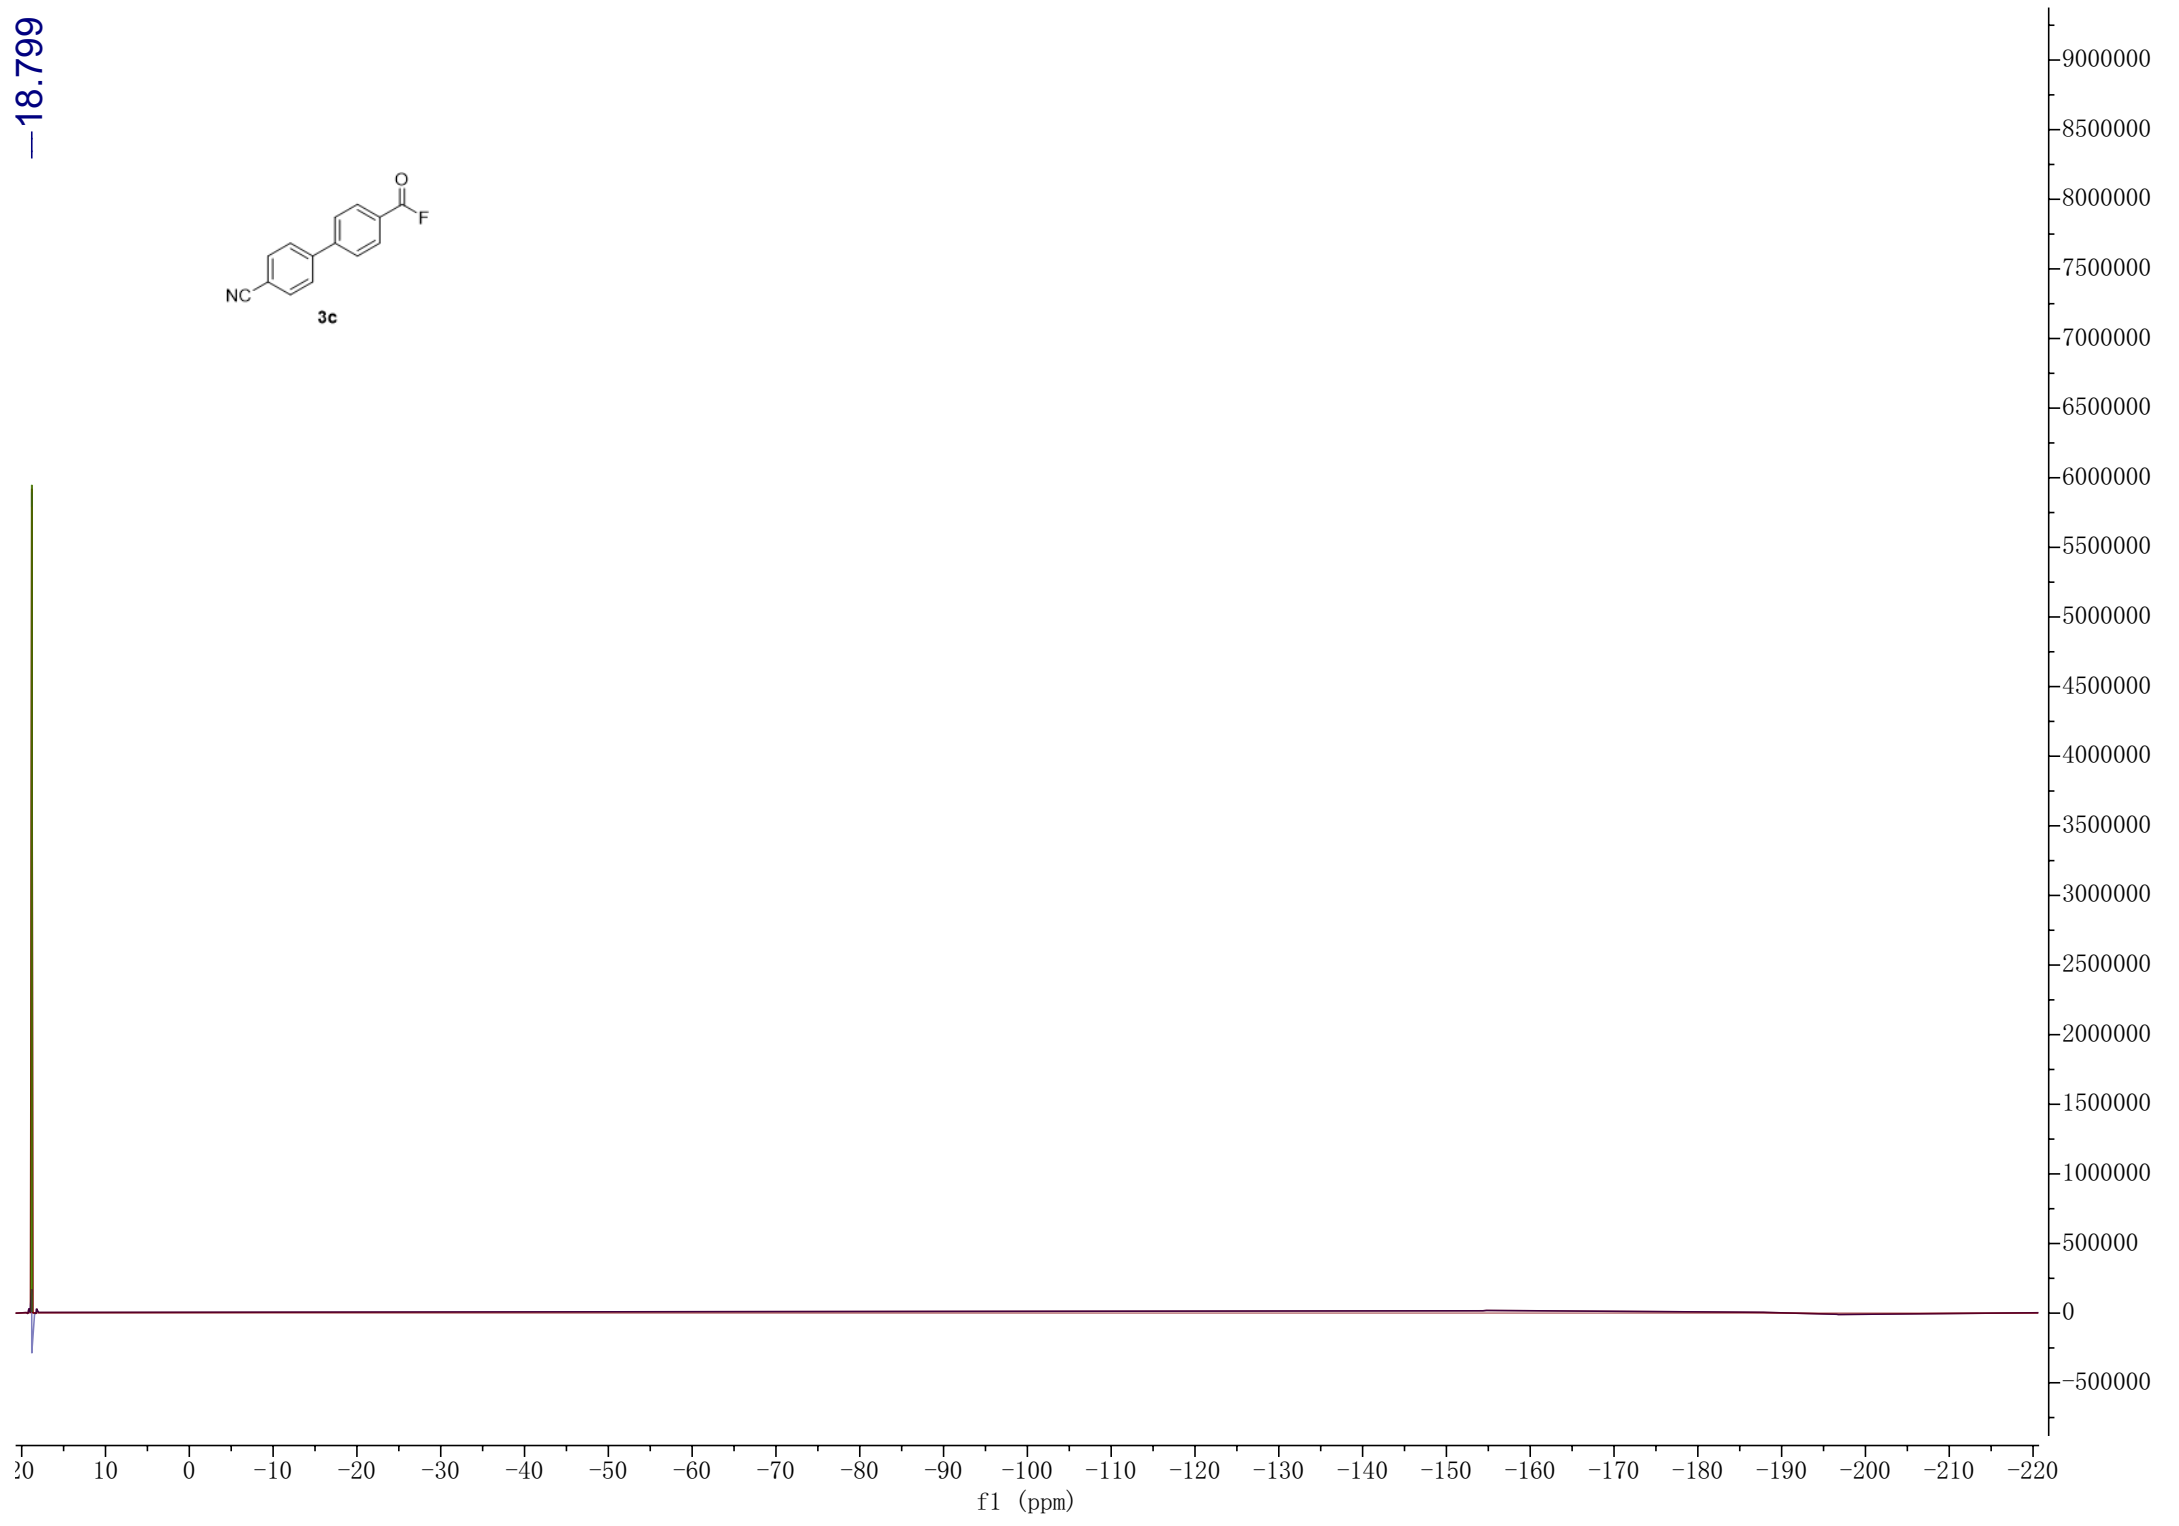

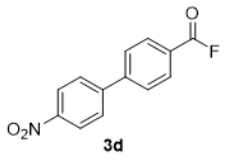

8.361  
8.346  
8.181  
8.167  
7.802  
7.799  
7.787  
7.775  
7.260

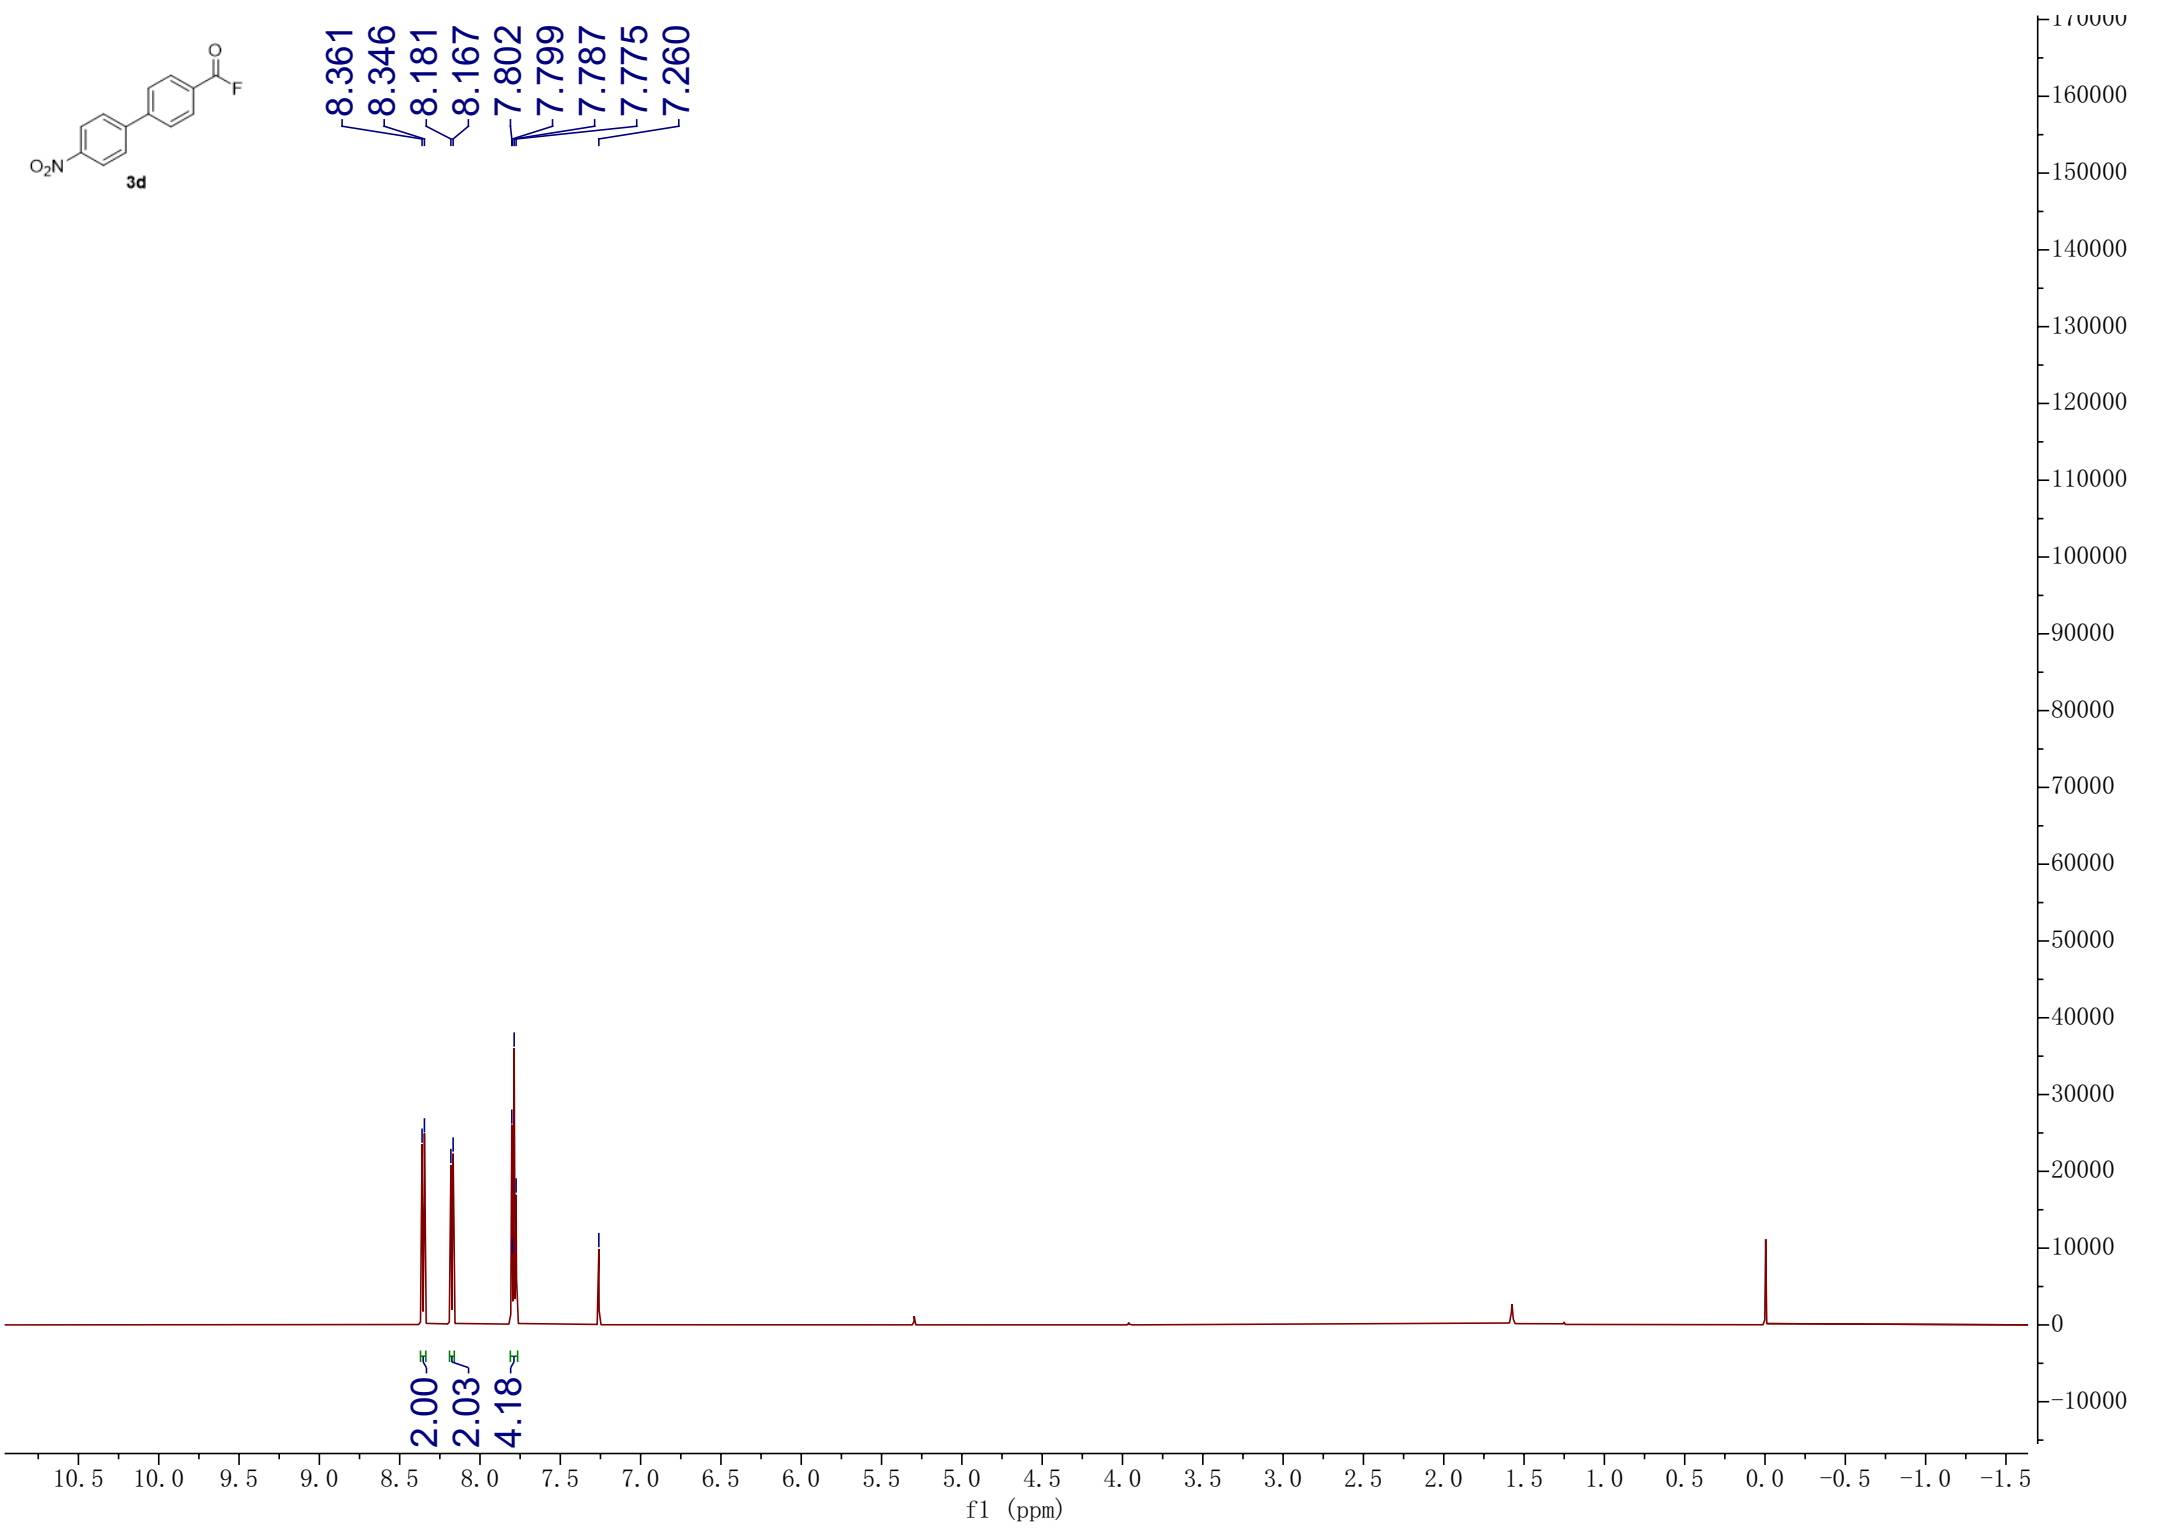



158.25  
155.97  
148.21  
145.73  
145.67  
132.42  
132.39  
128.50  
128.28  
125.51  
125.10  
124.55

77.44  
77.23  
77.02

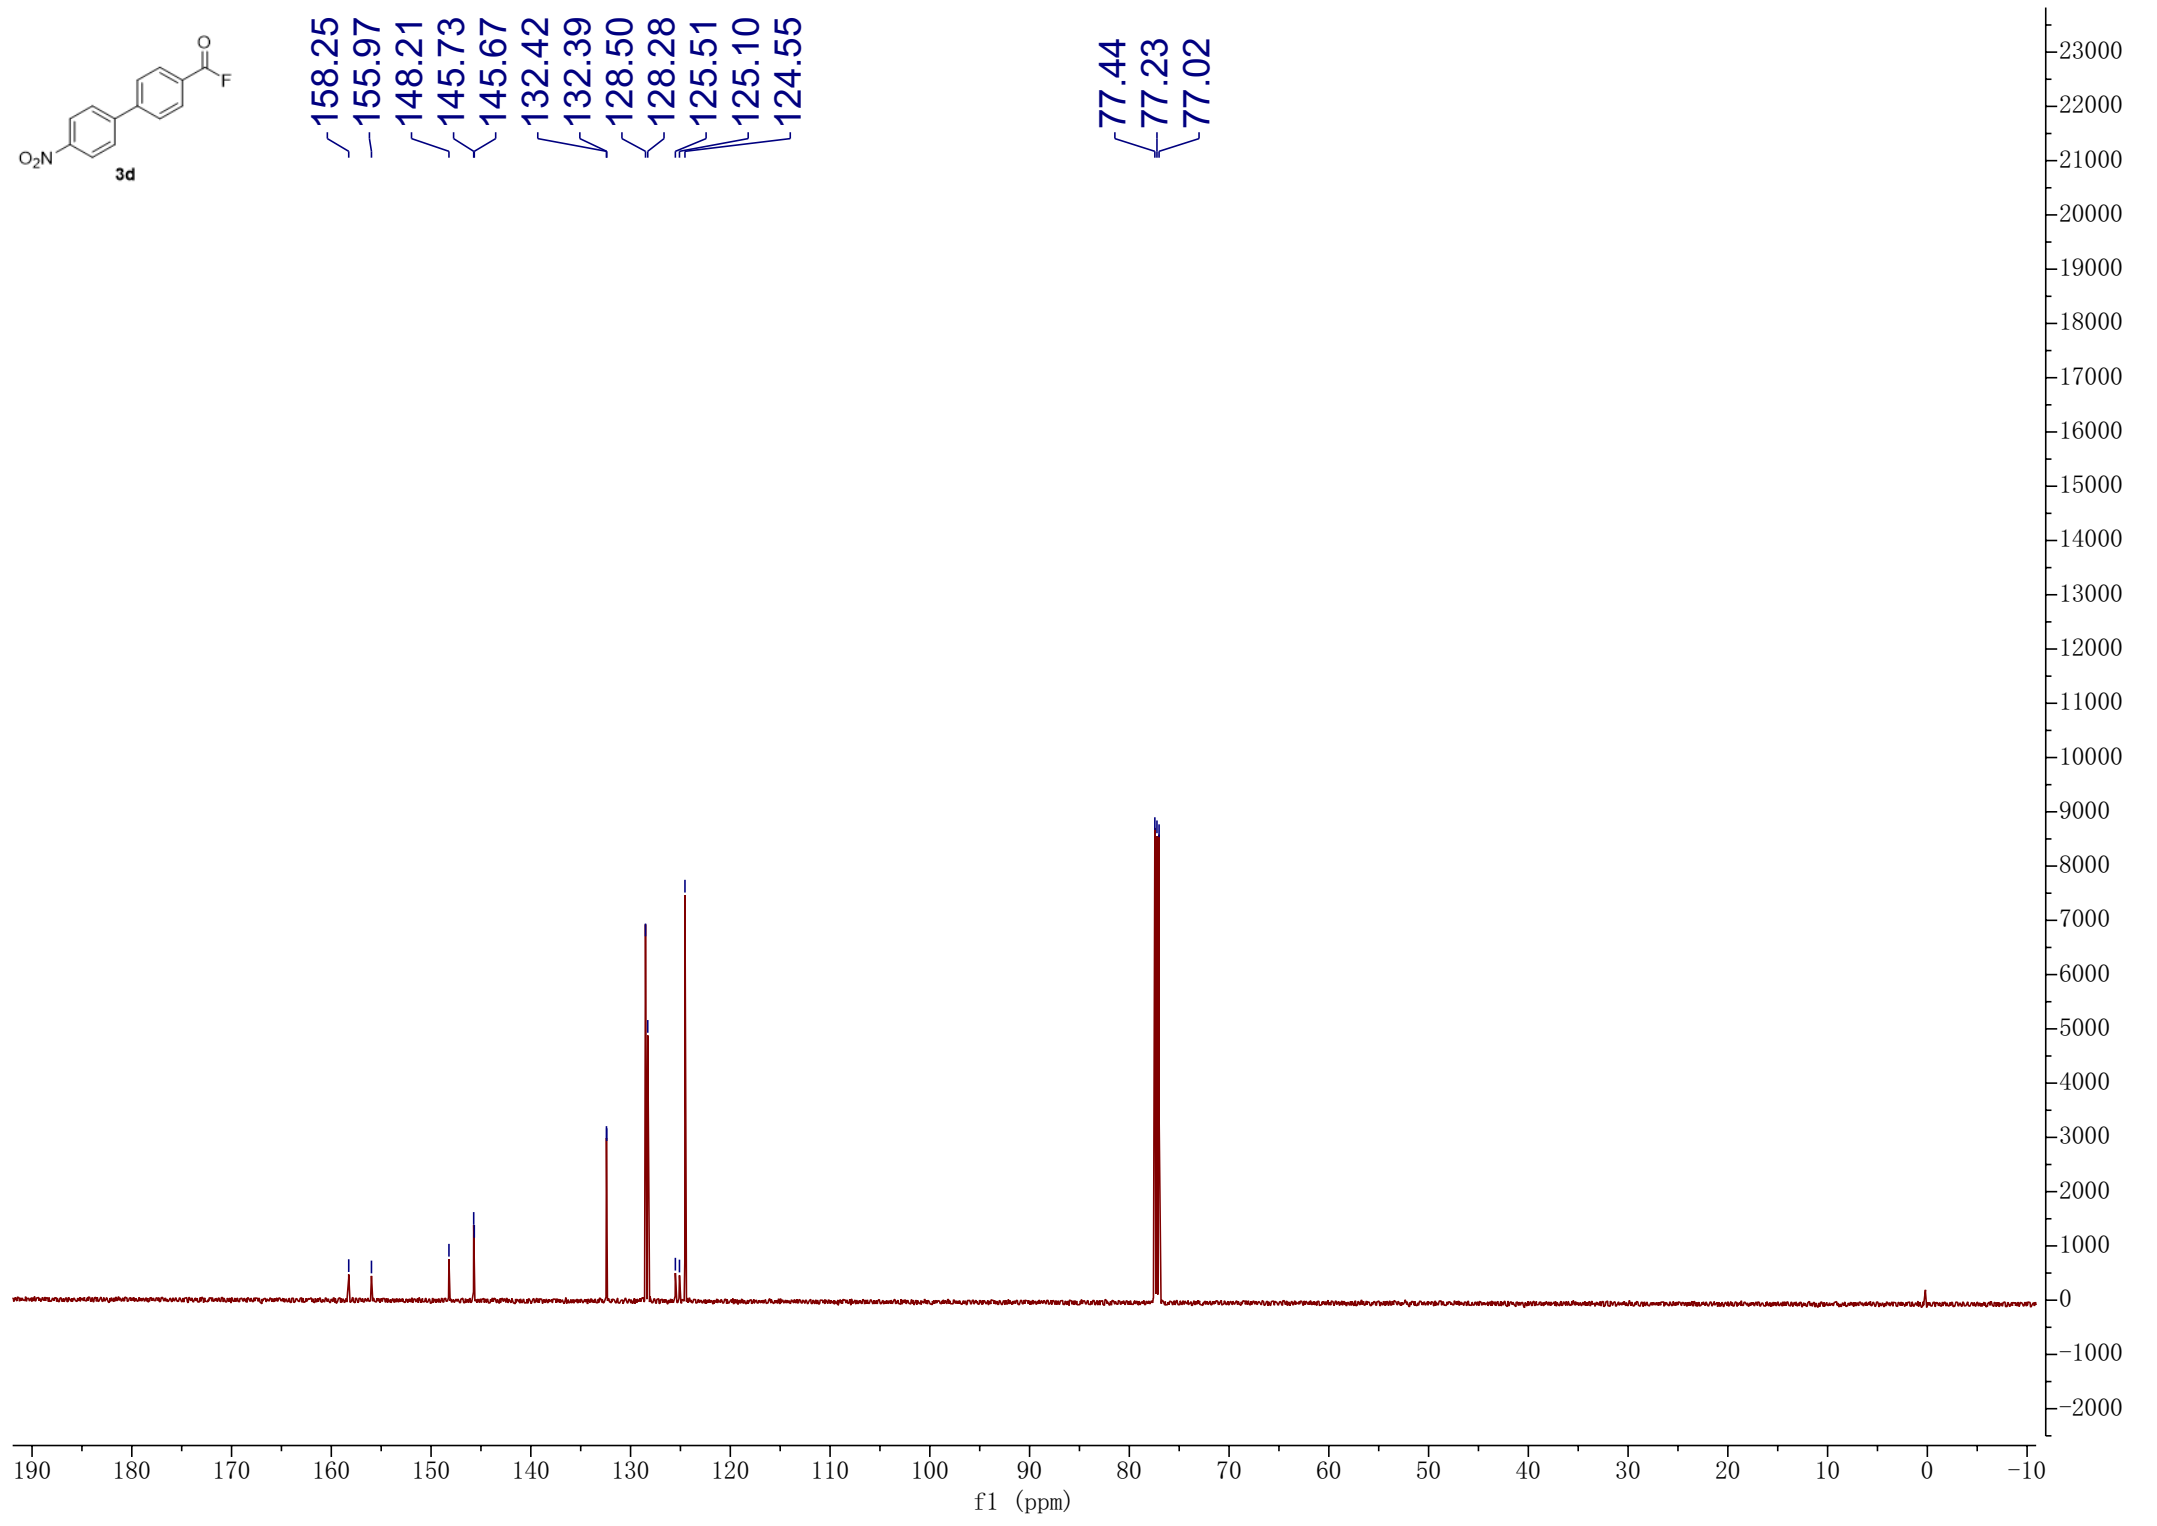

18.900

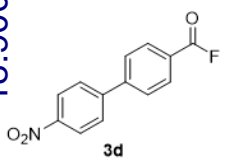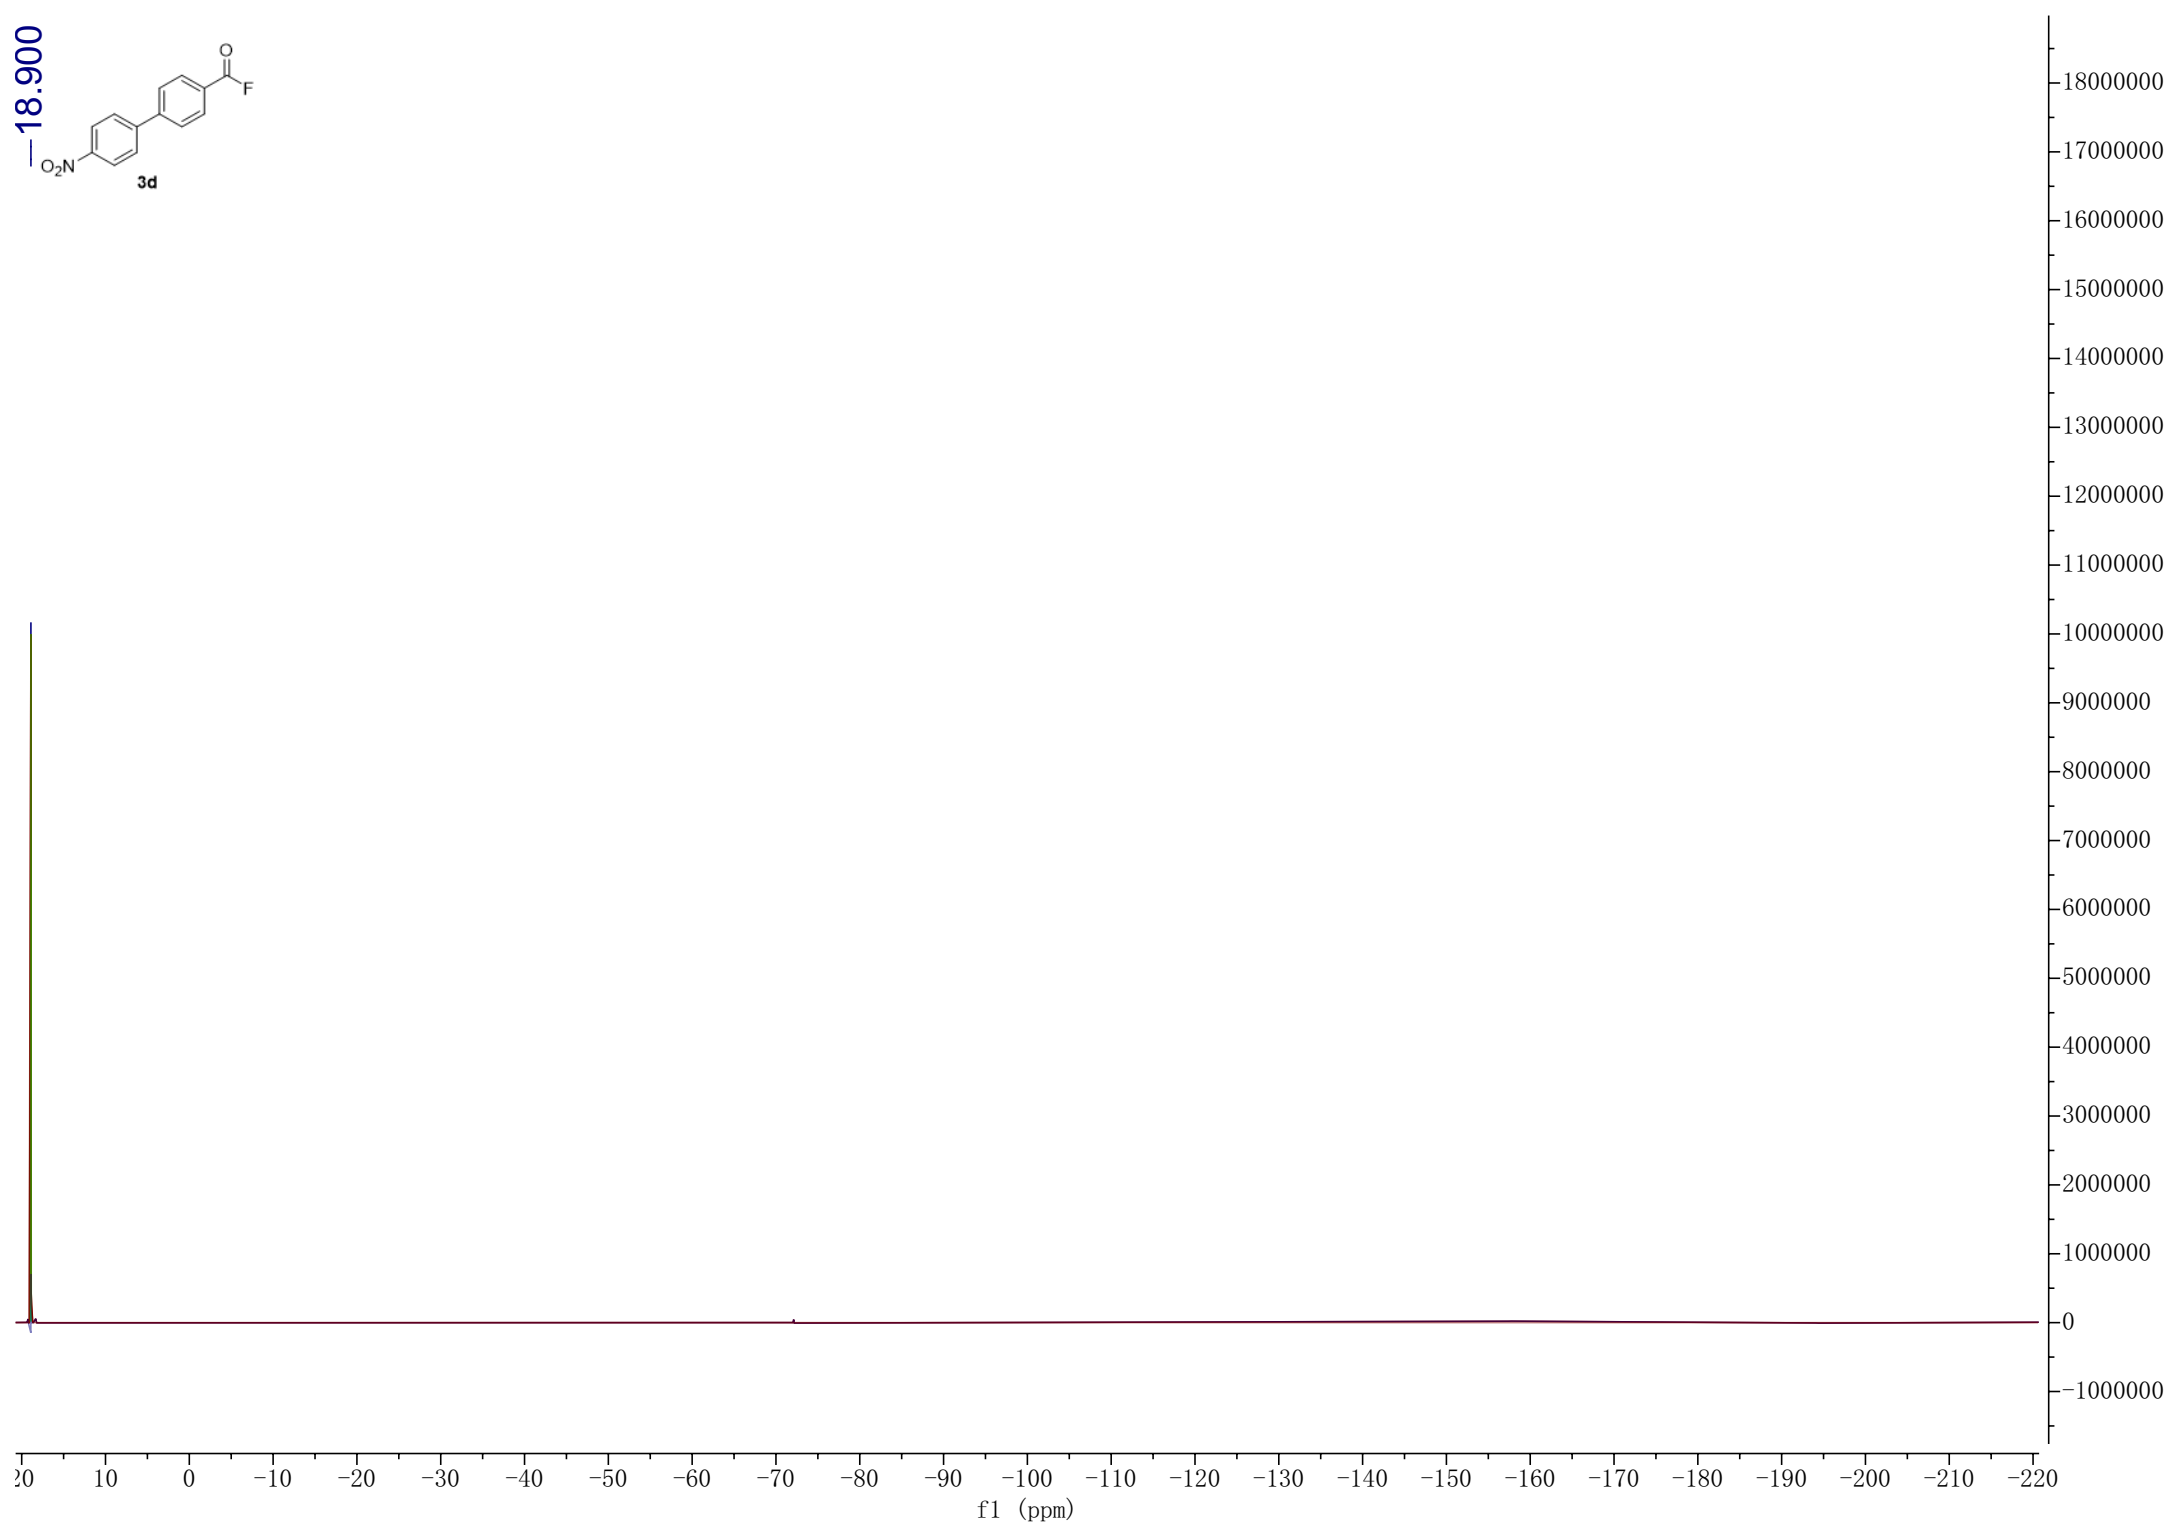

8.100  
8.080  
7.676  
7.672  
7.657  
7.653  
7.587  
7.584  
7.568  
7.565  
7.550  
7.546  
7.519  
7.515  
7.500  
7.496  
7.488  
7.485  
7.481  
7.478  
7.471  
7.466  
7.464  
7.382  
7.379  
7.363  
7.360  
7.260

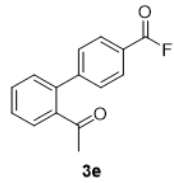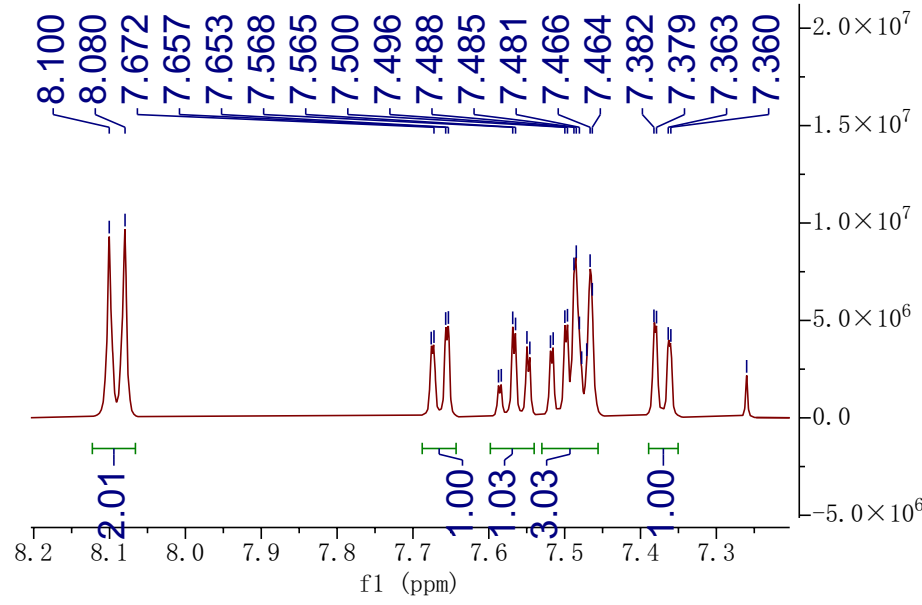

-2.218

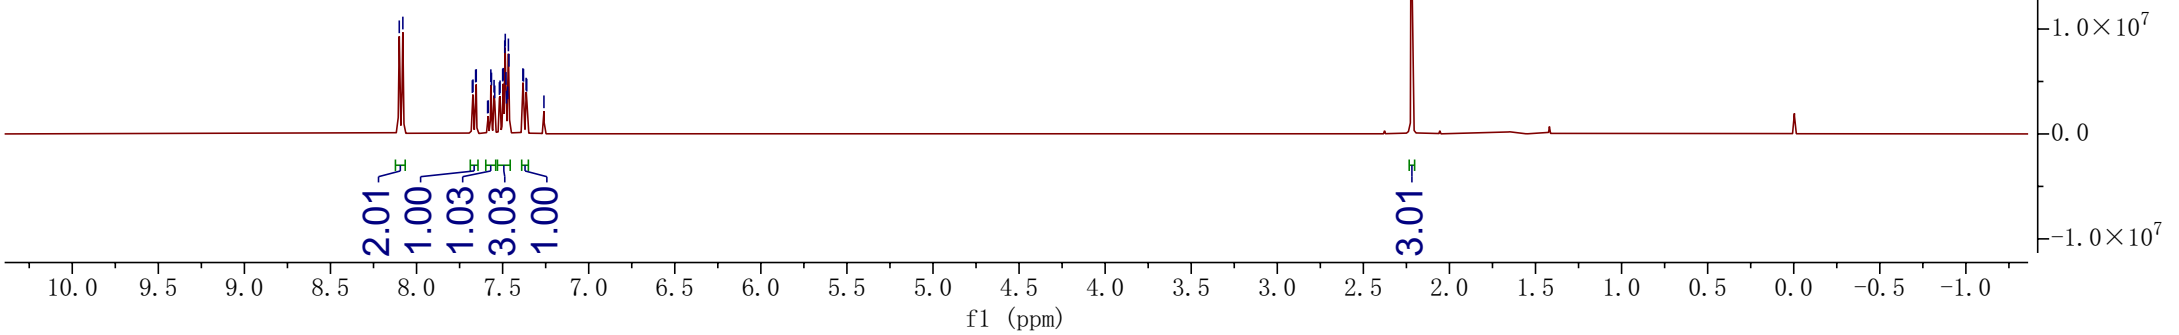

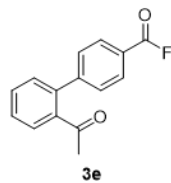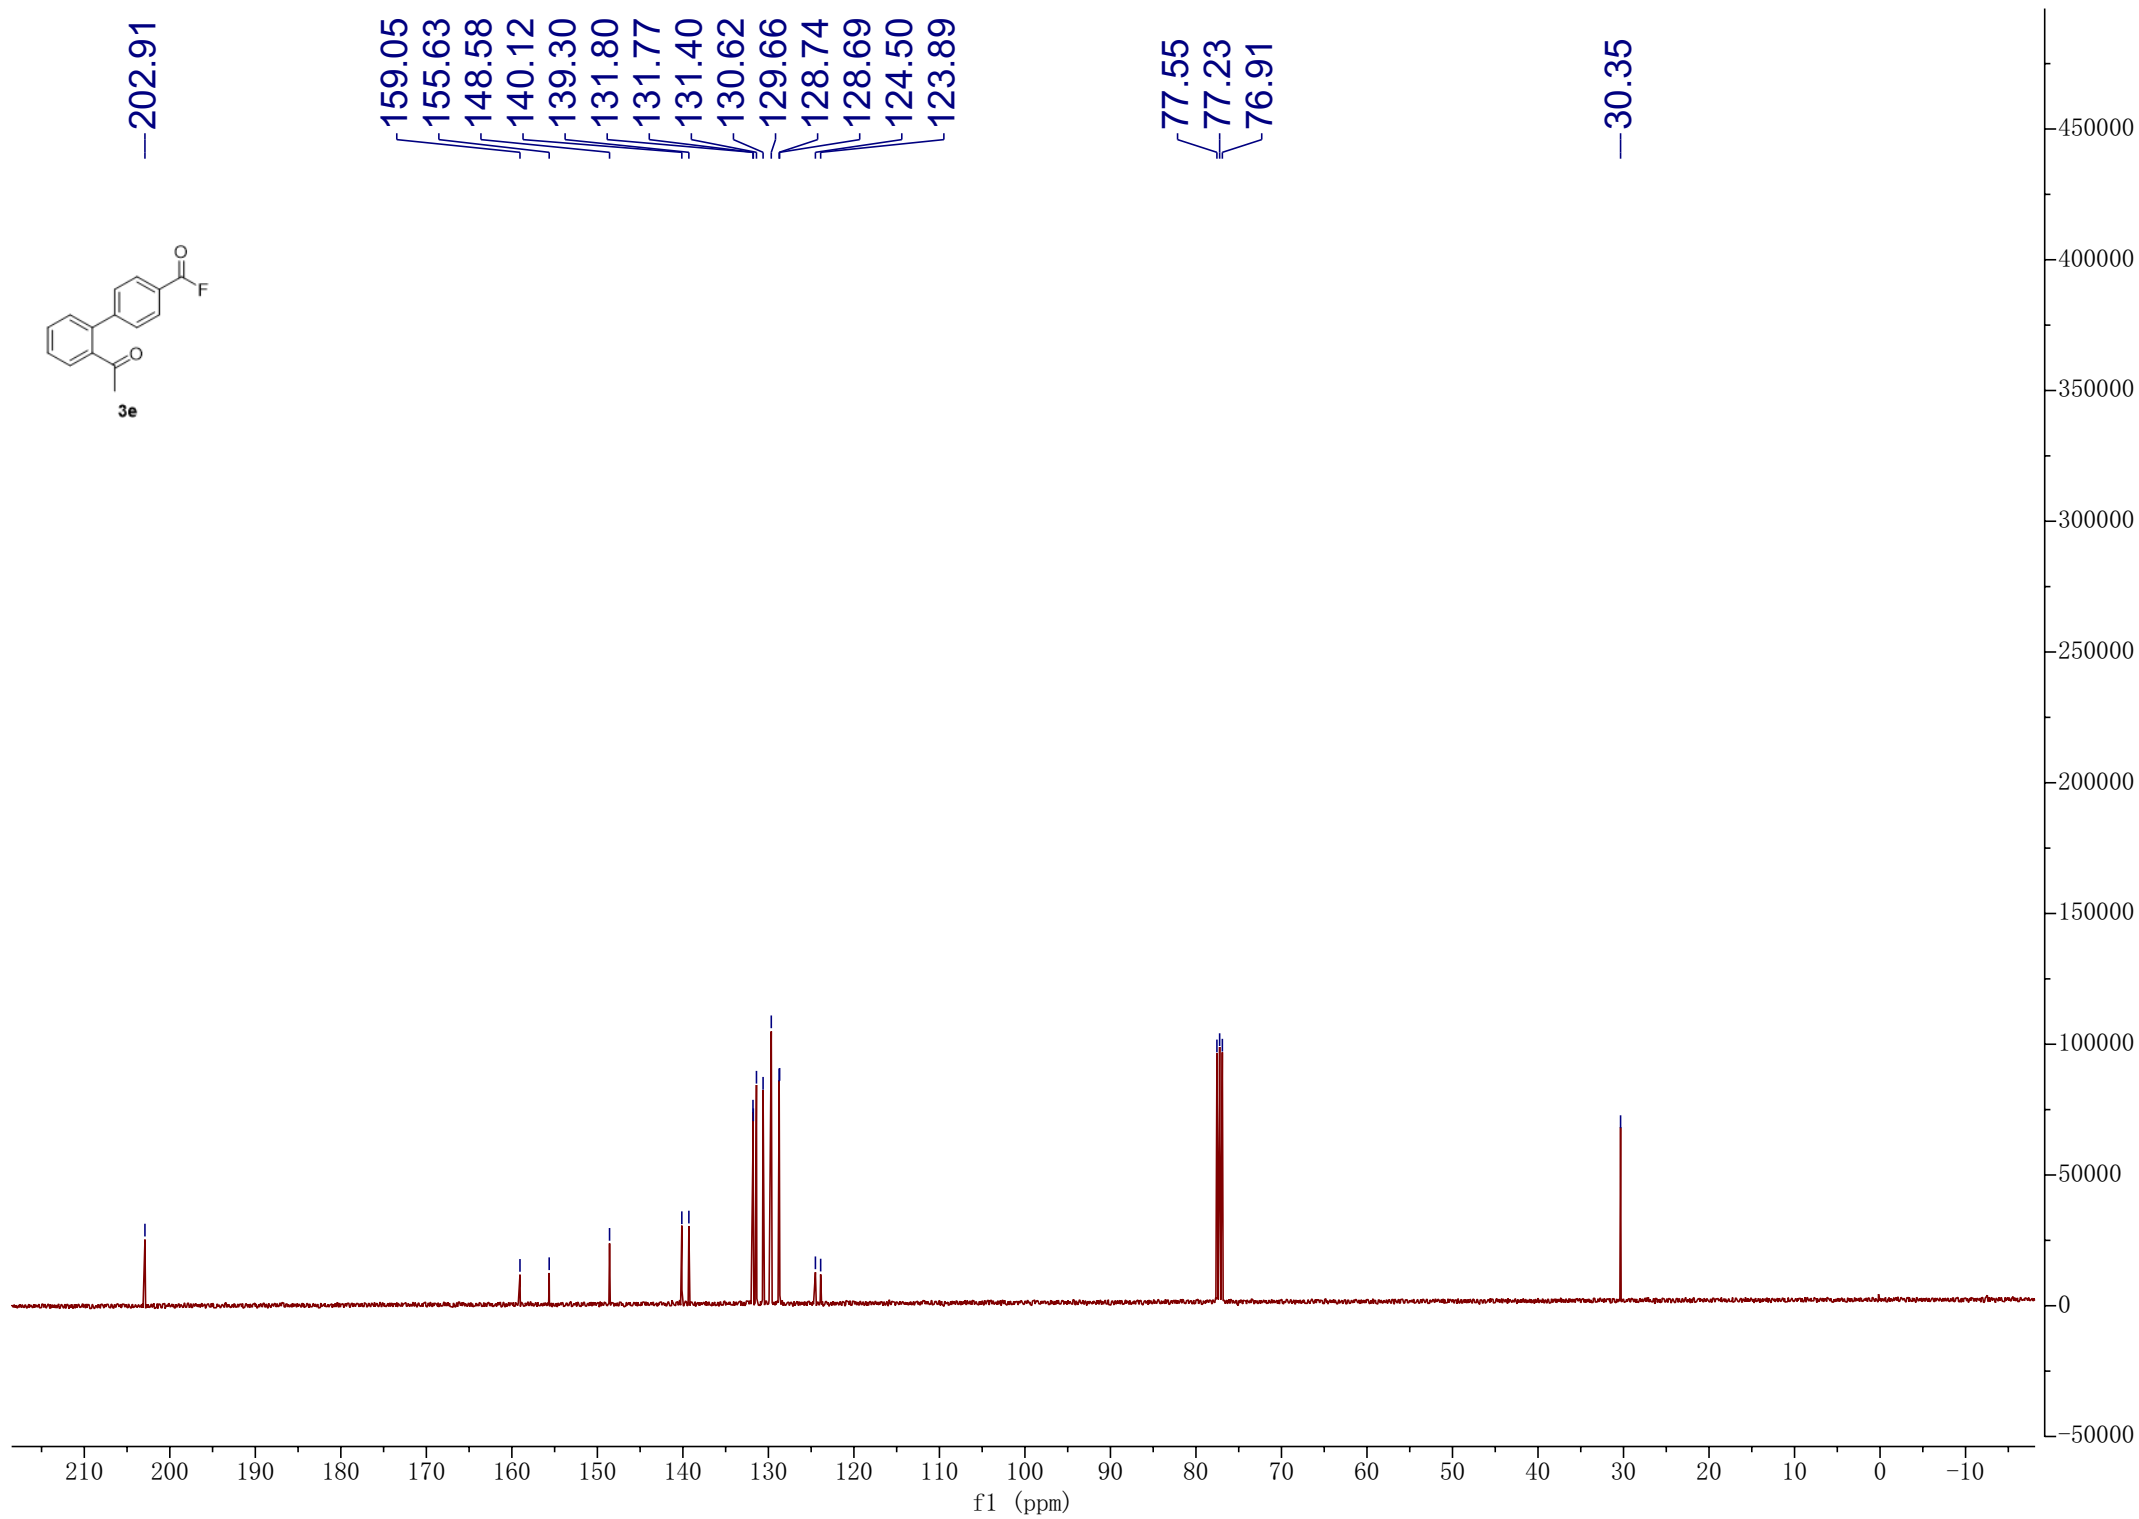



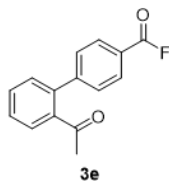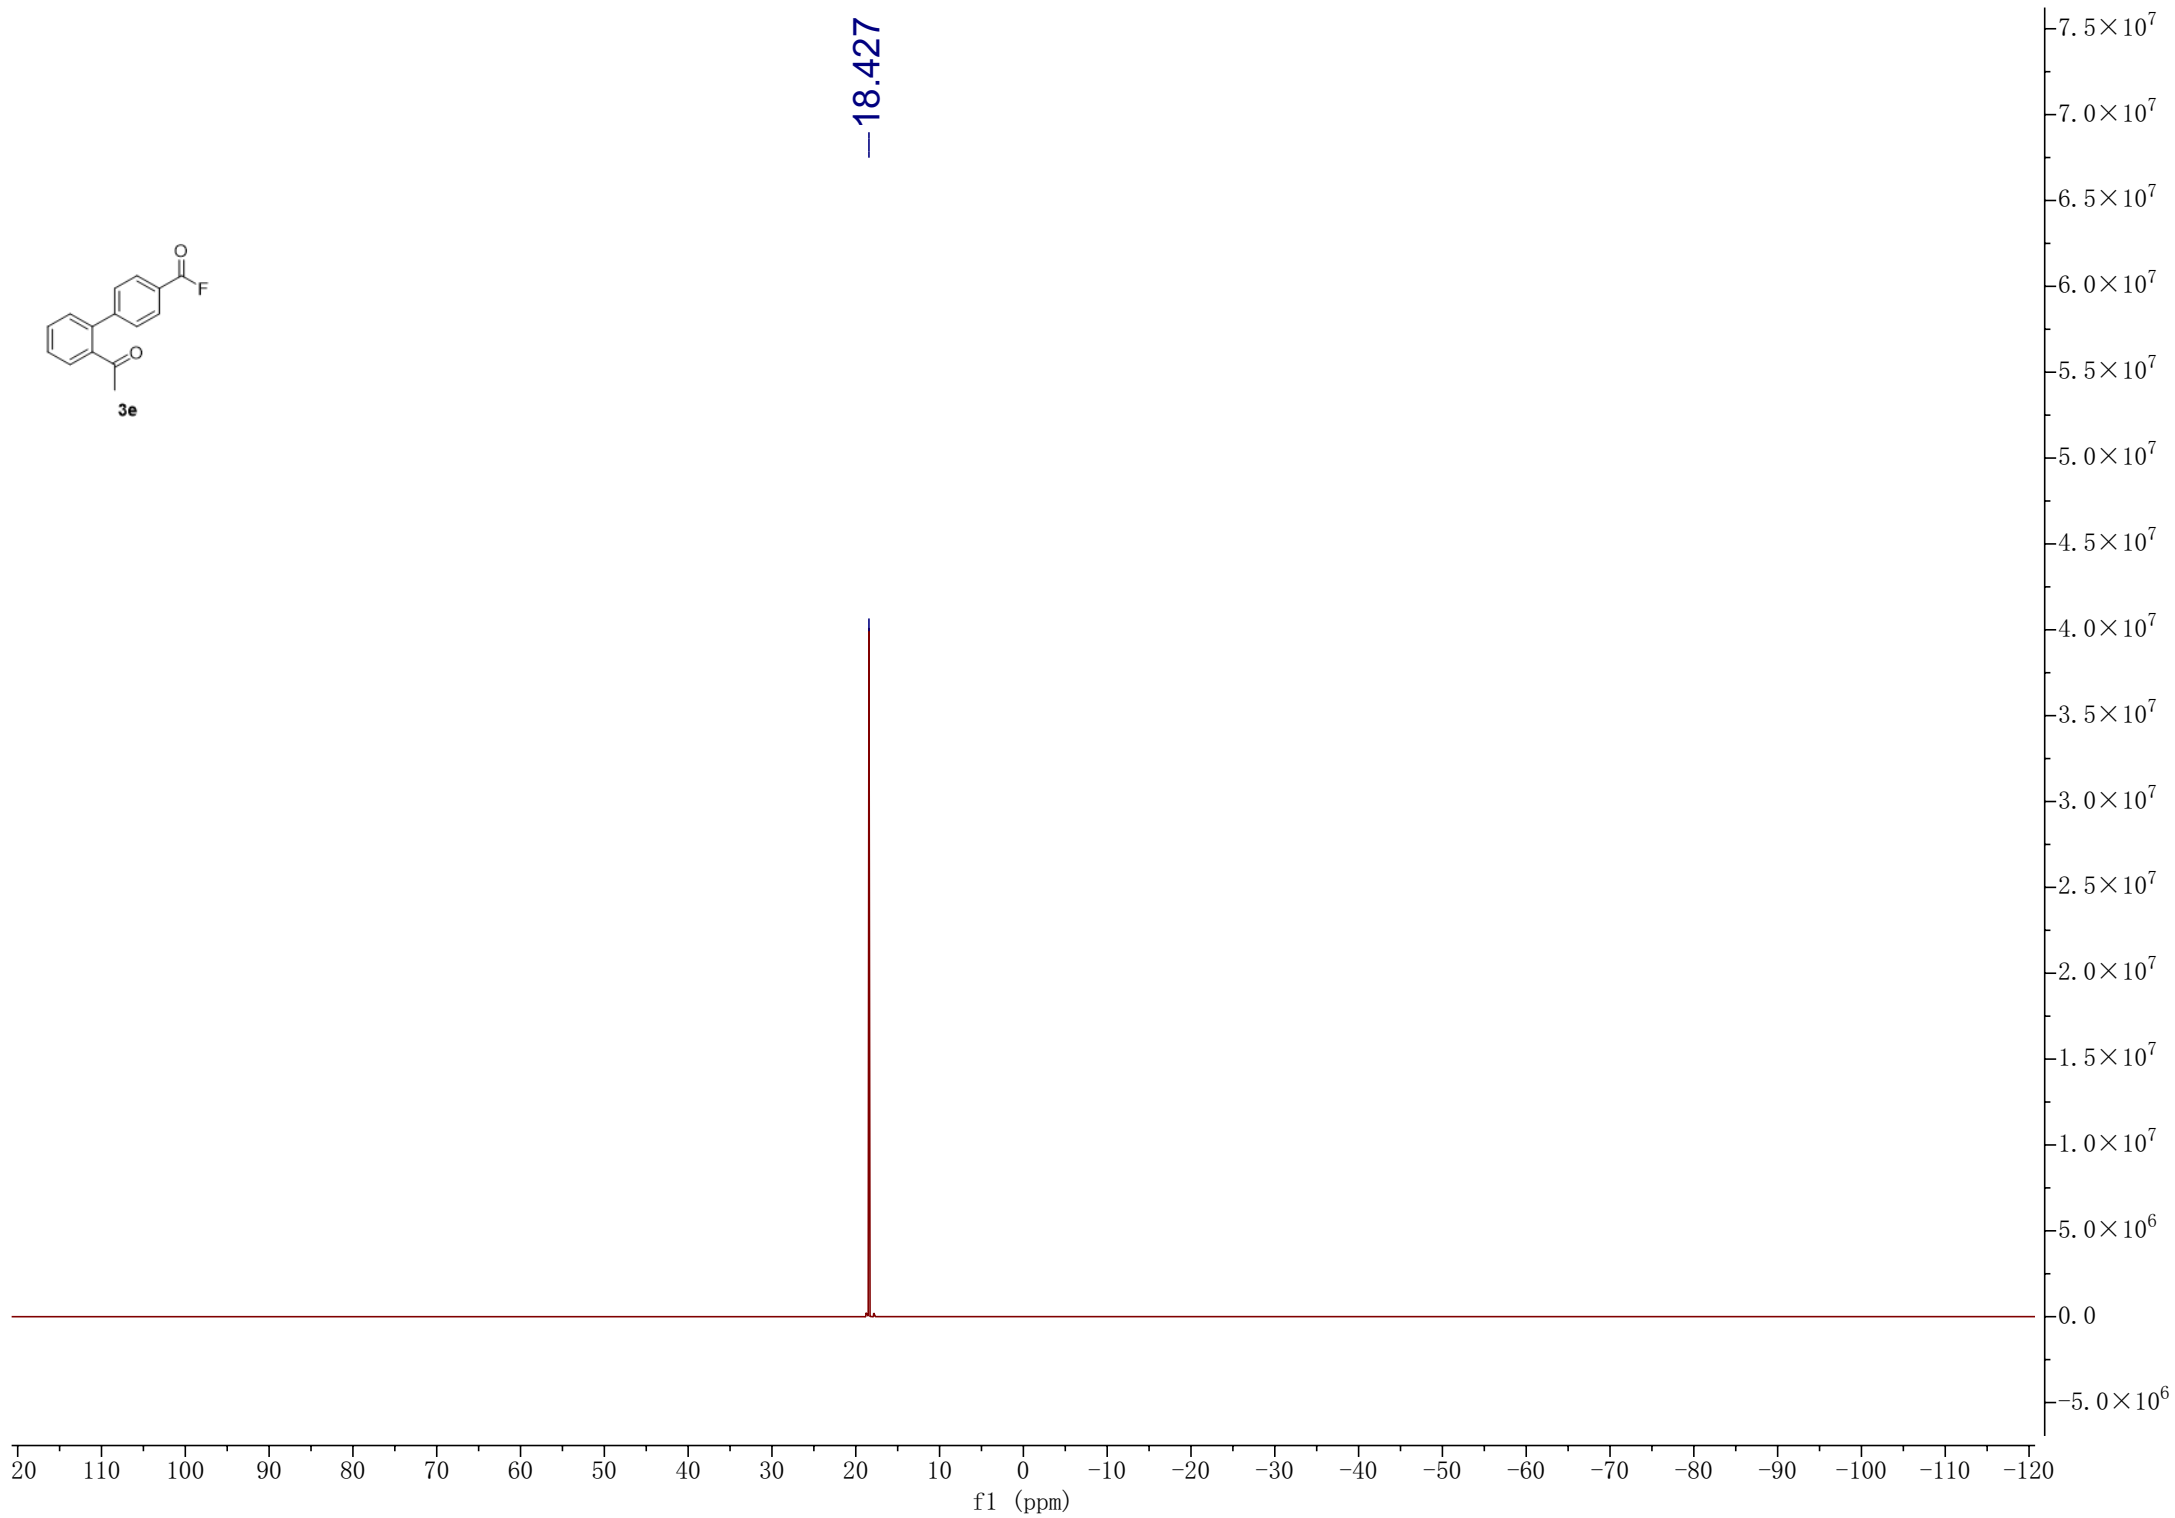

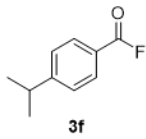

7.972  
7.951  
7.384  
7.364  
7.260

3.054  
3.037  
3.020  
3.002  
2.985  
2.968  
2.951

1.295  
1.278

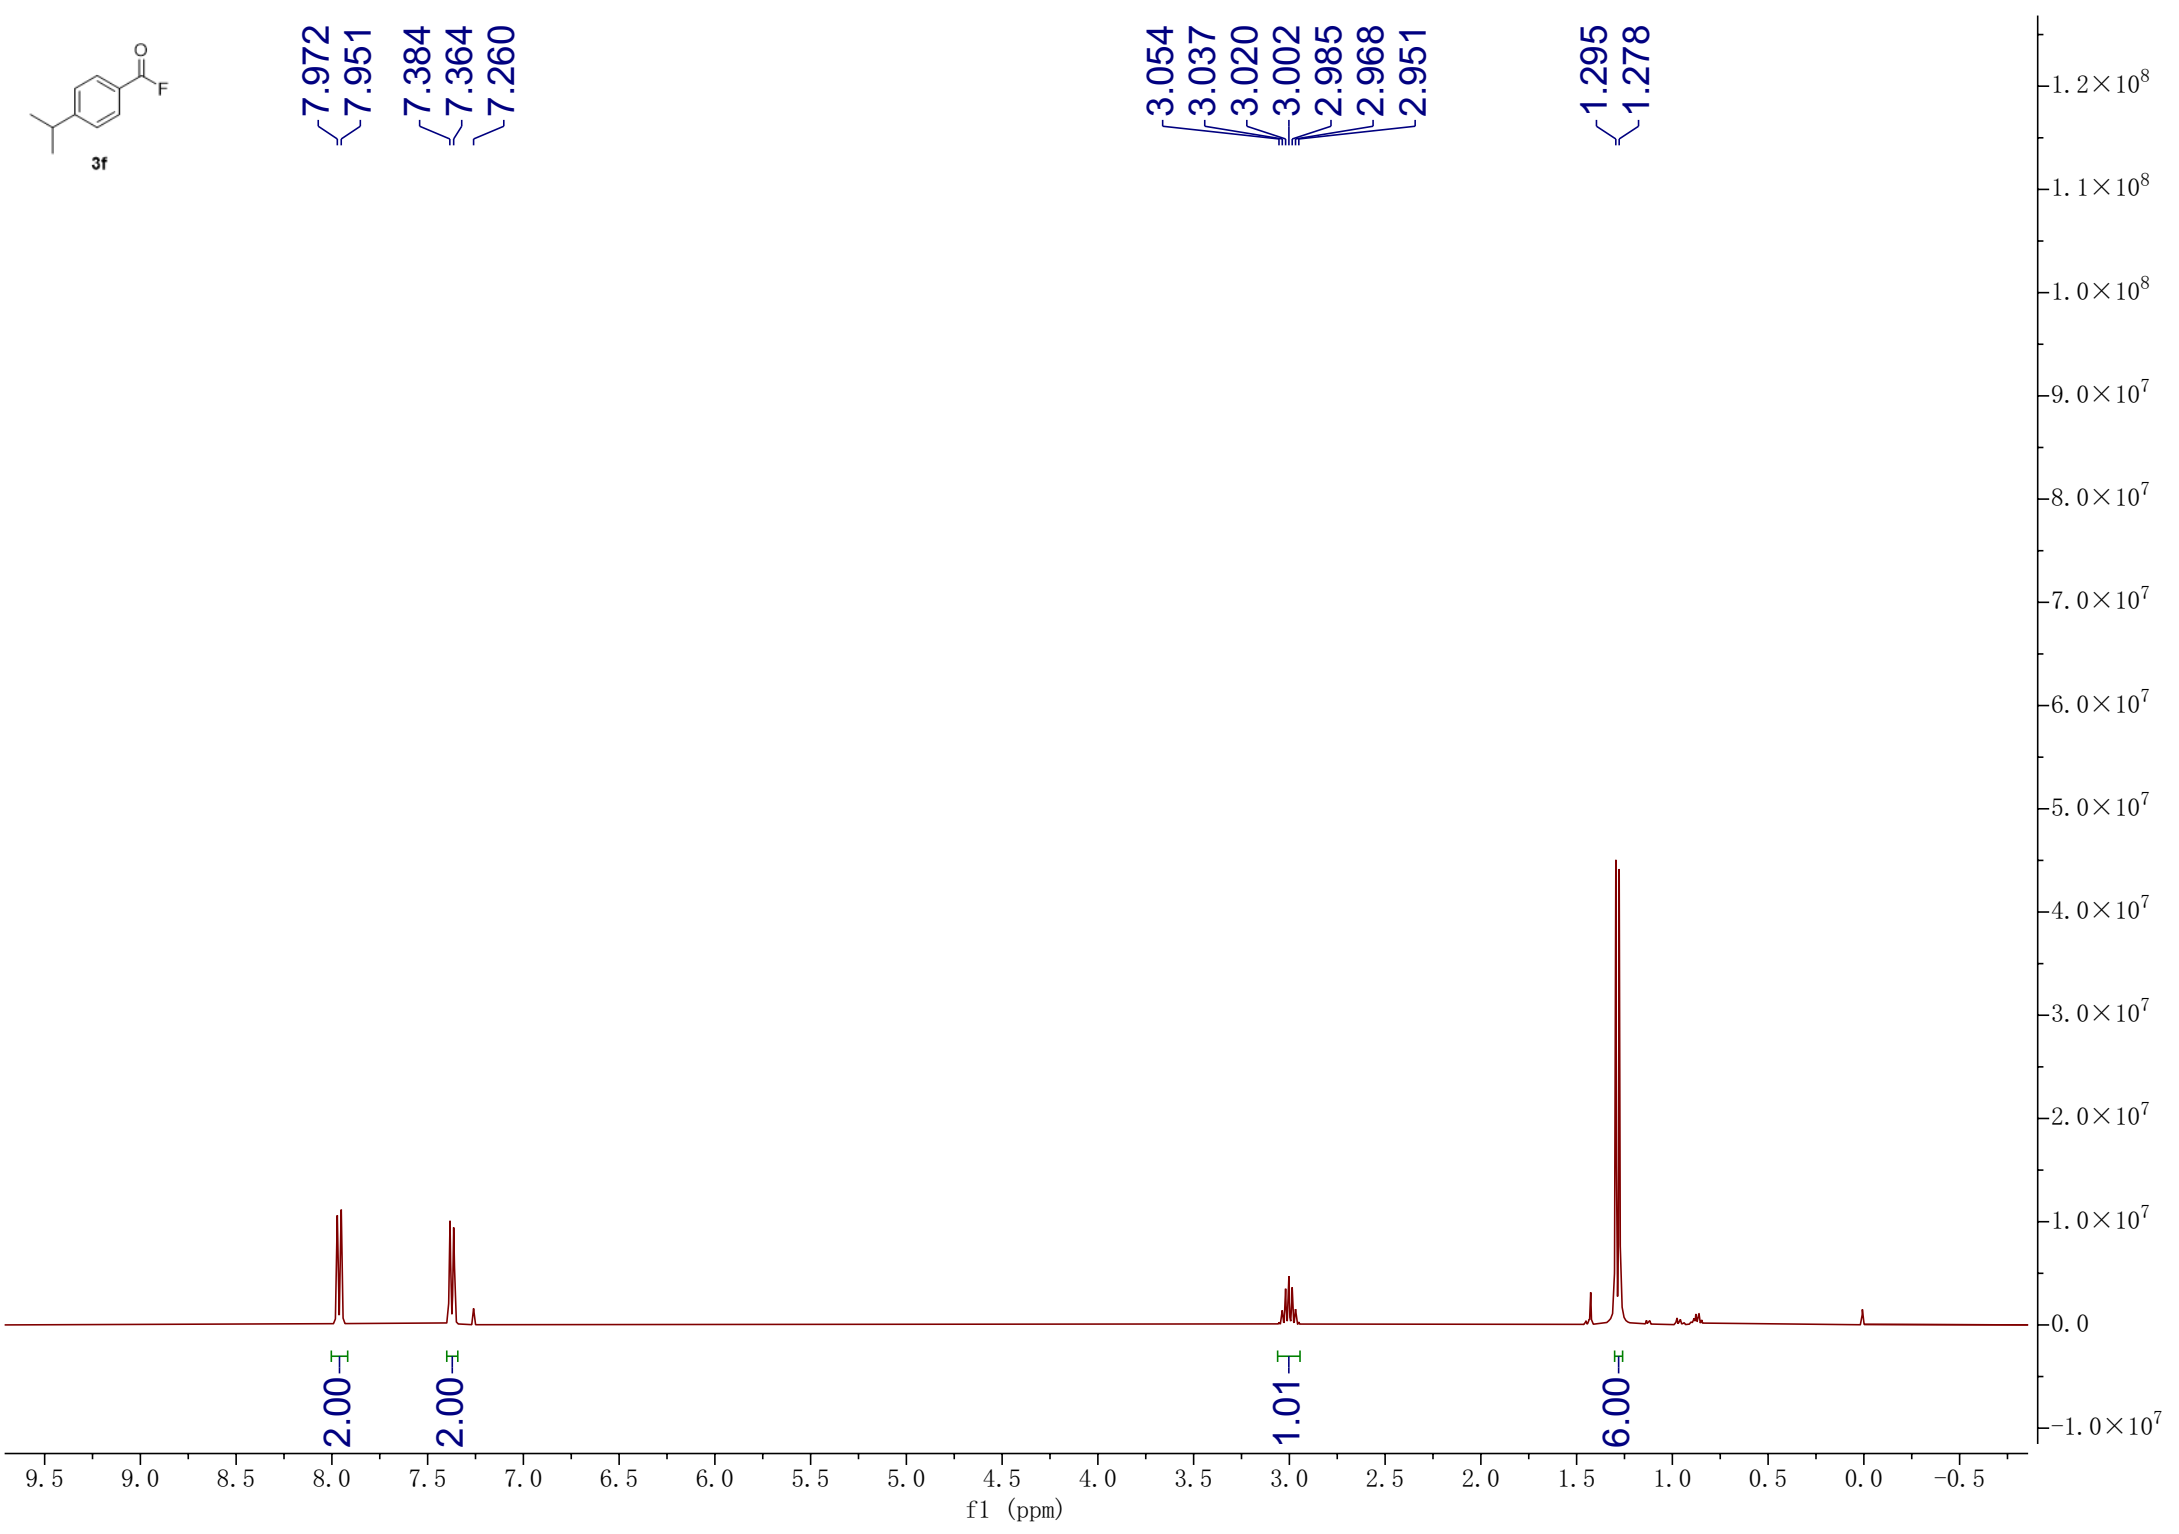

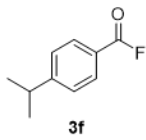

159.32  
157.42  
155.91

131.84  
131.80  
127.40  
127.39  
122.90  
122.30

77.55  
77.23  
76.91

-34.64

-23.65

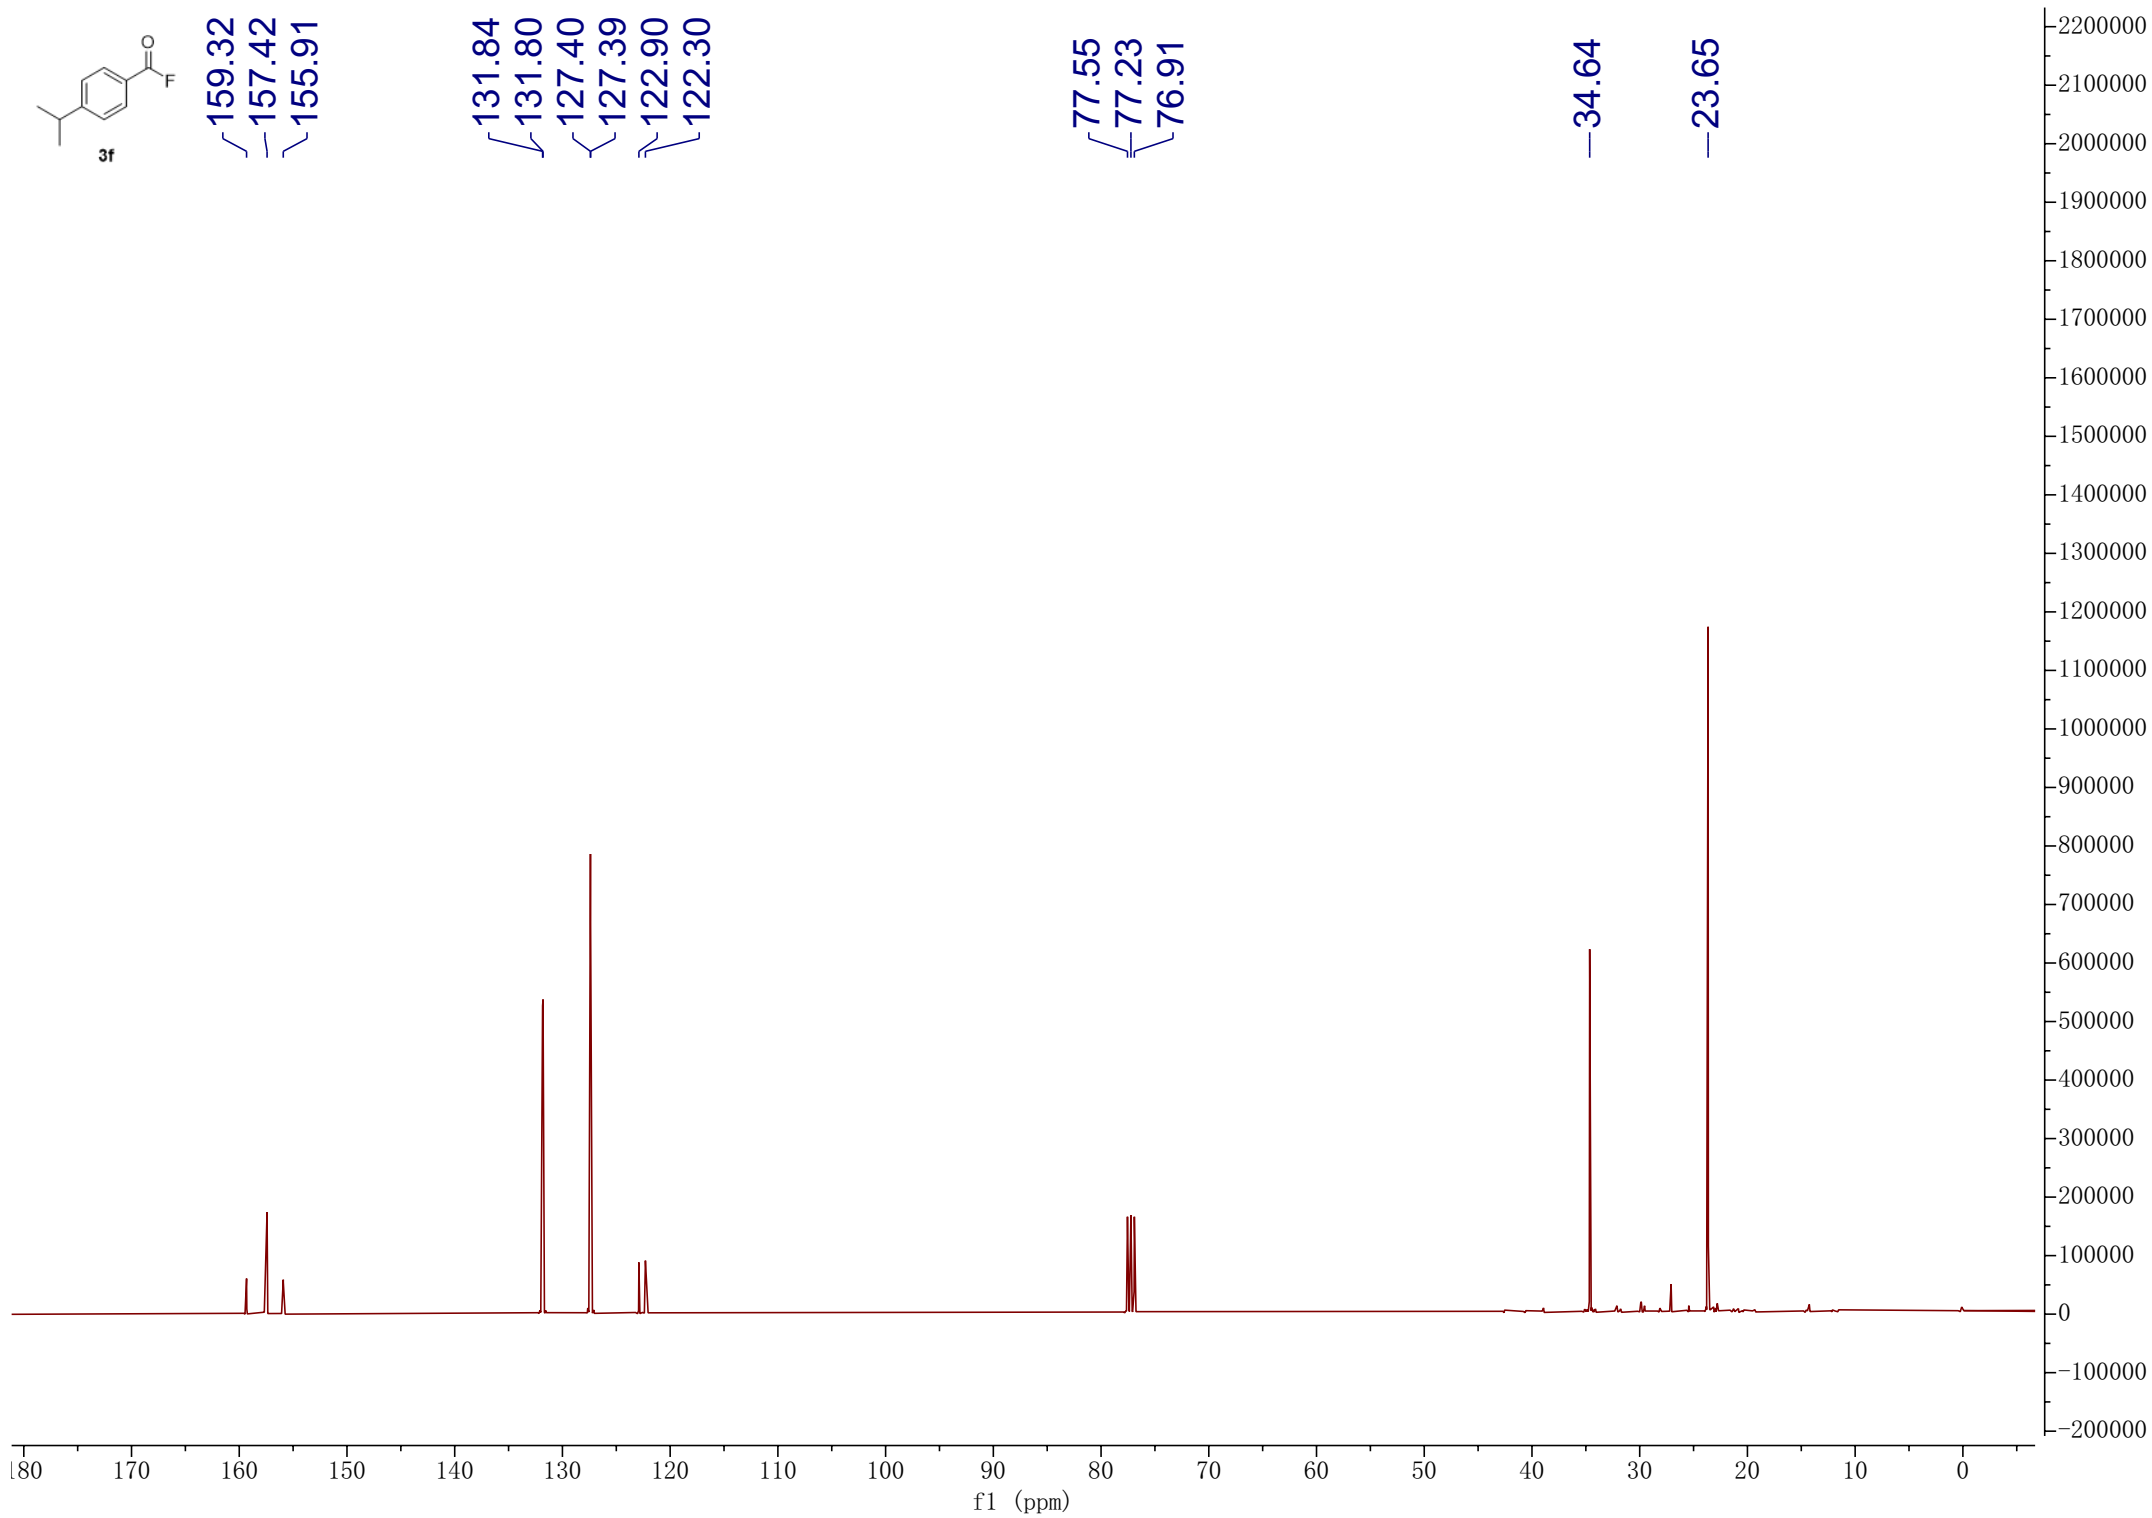

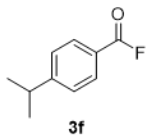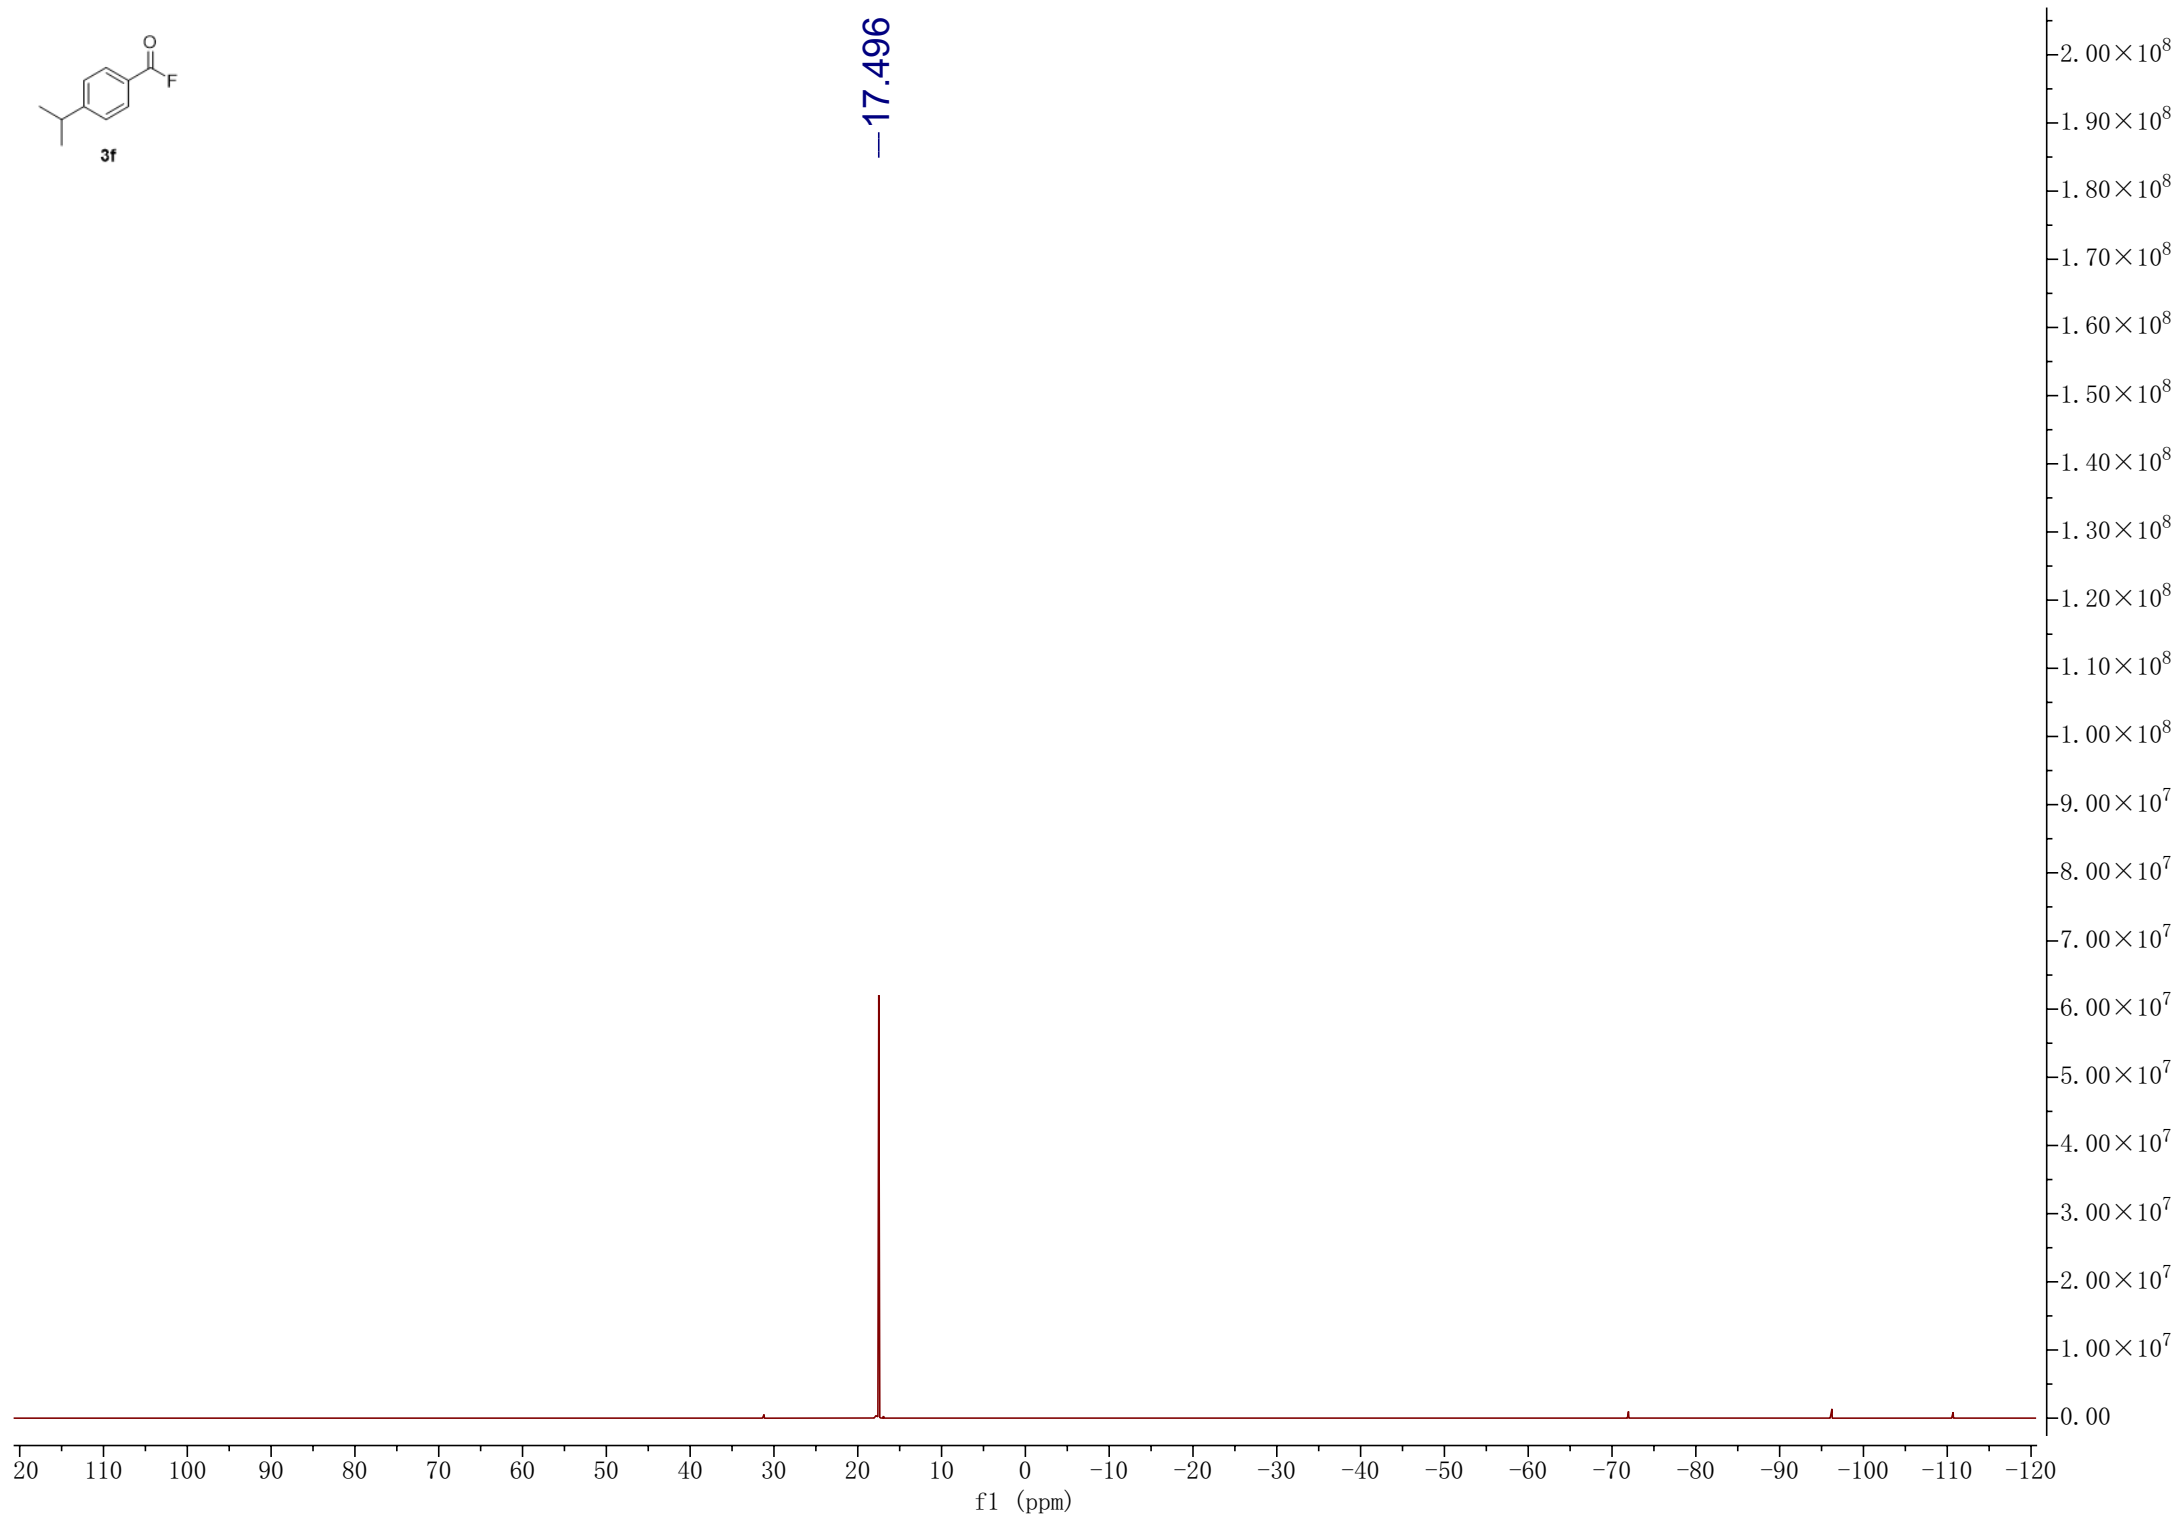

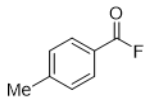

3g

7.940  
7.926  
7.328  
7.314  
7.260

-2.456

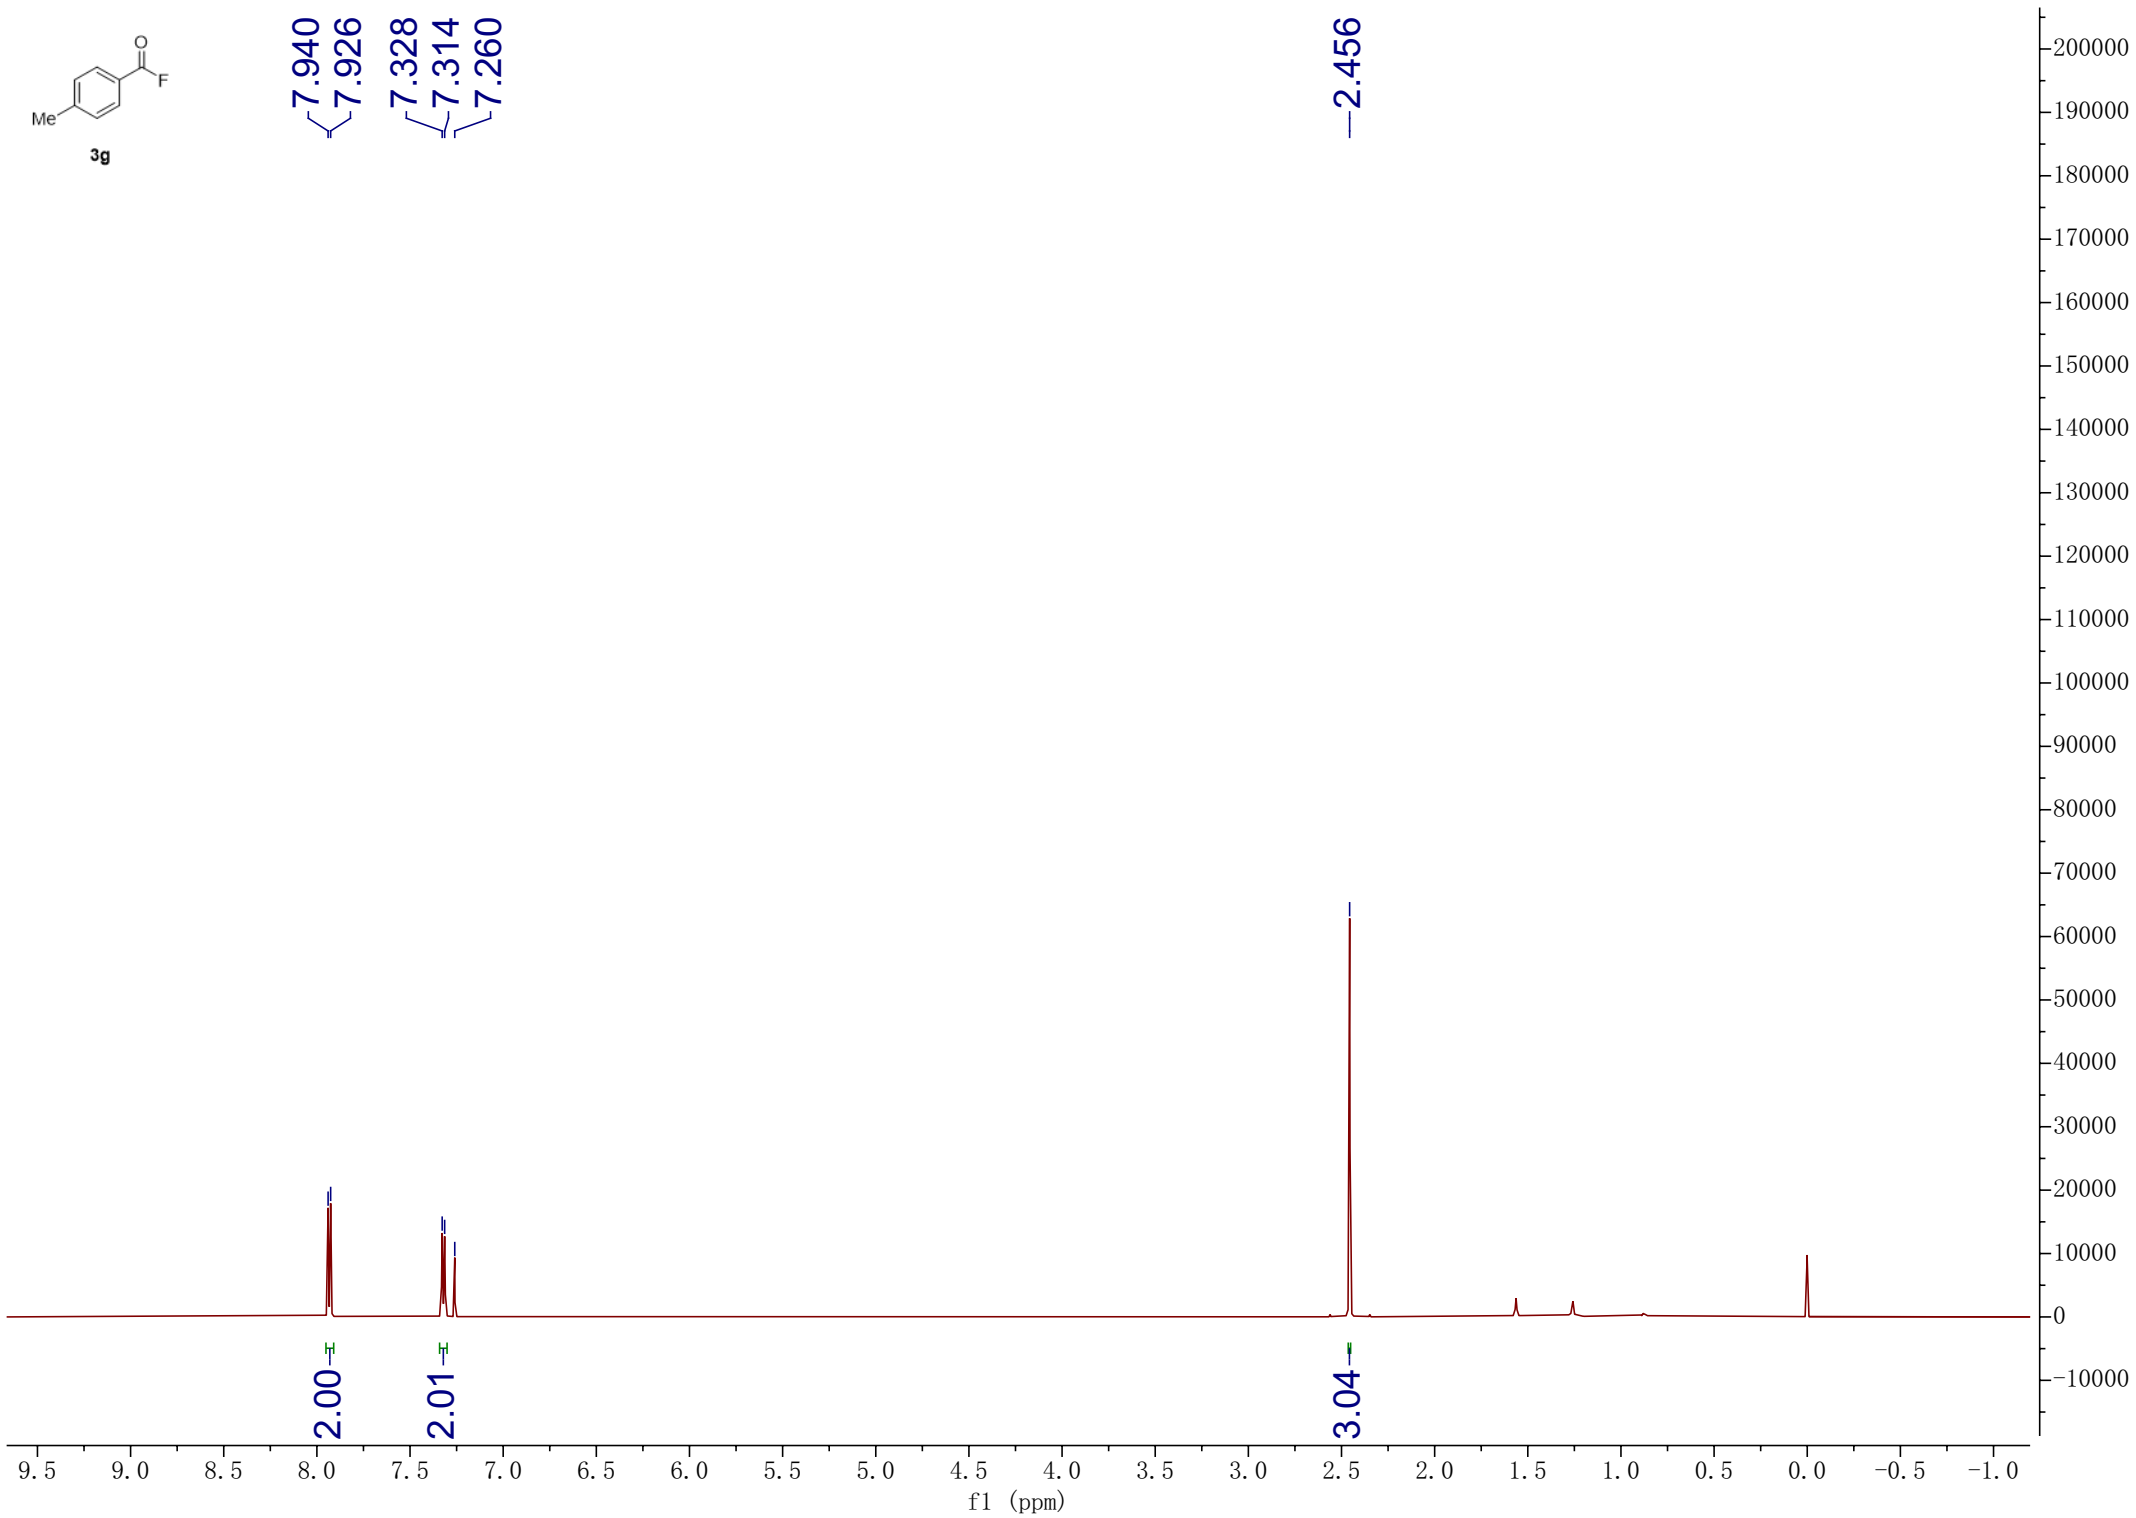

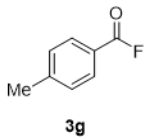

158.88  
156.60

146.80

131.72  
131.70  
130.00  
130.00  
122.56  
122.16

77.44  
77.23  
77.02

22.12

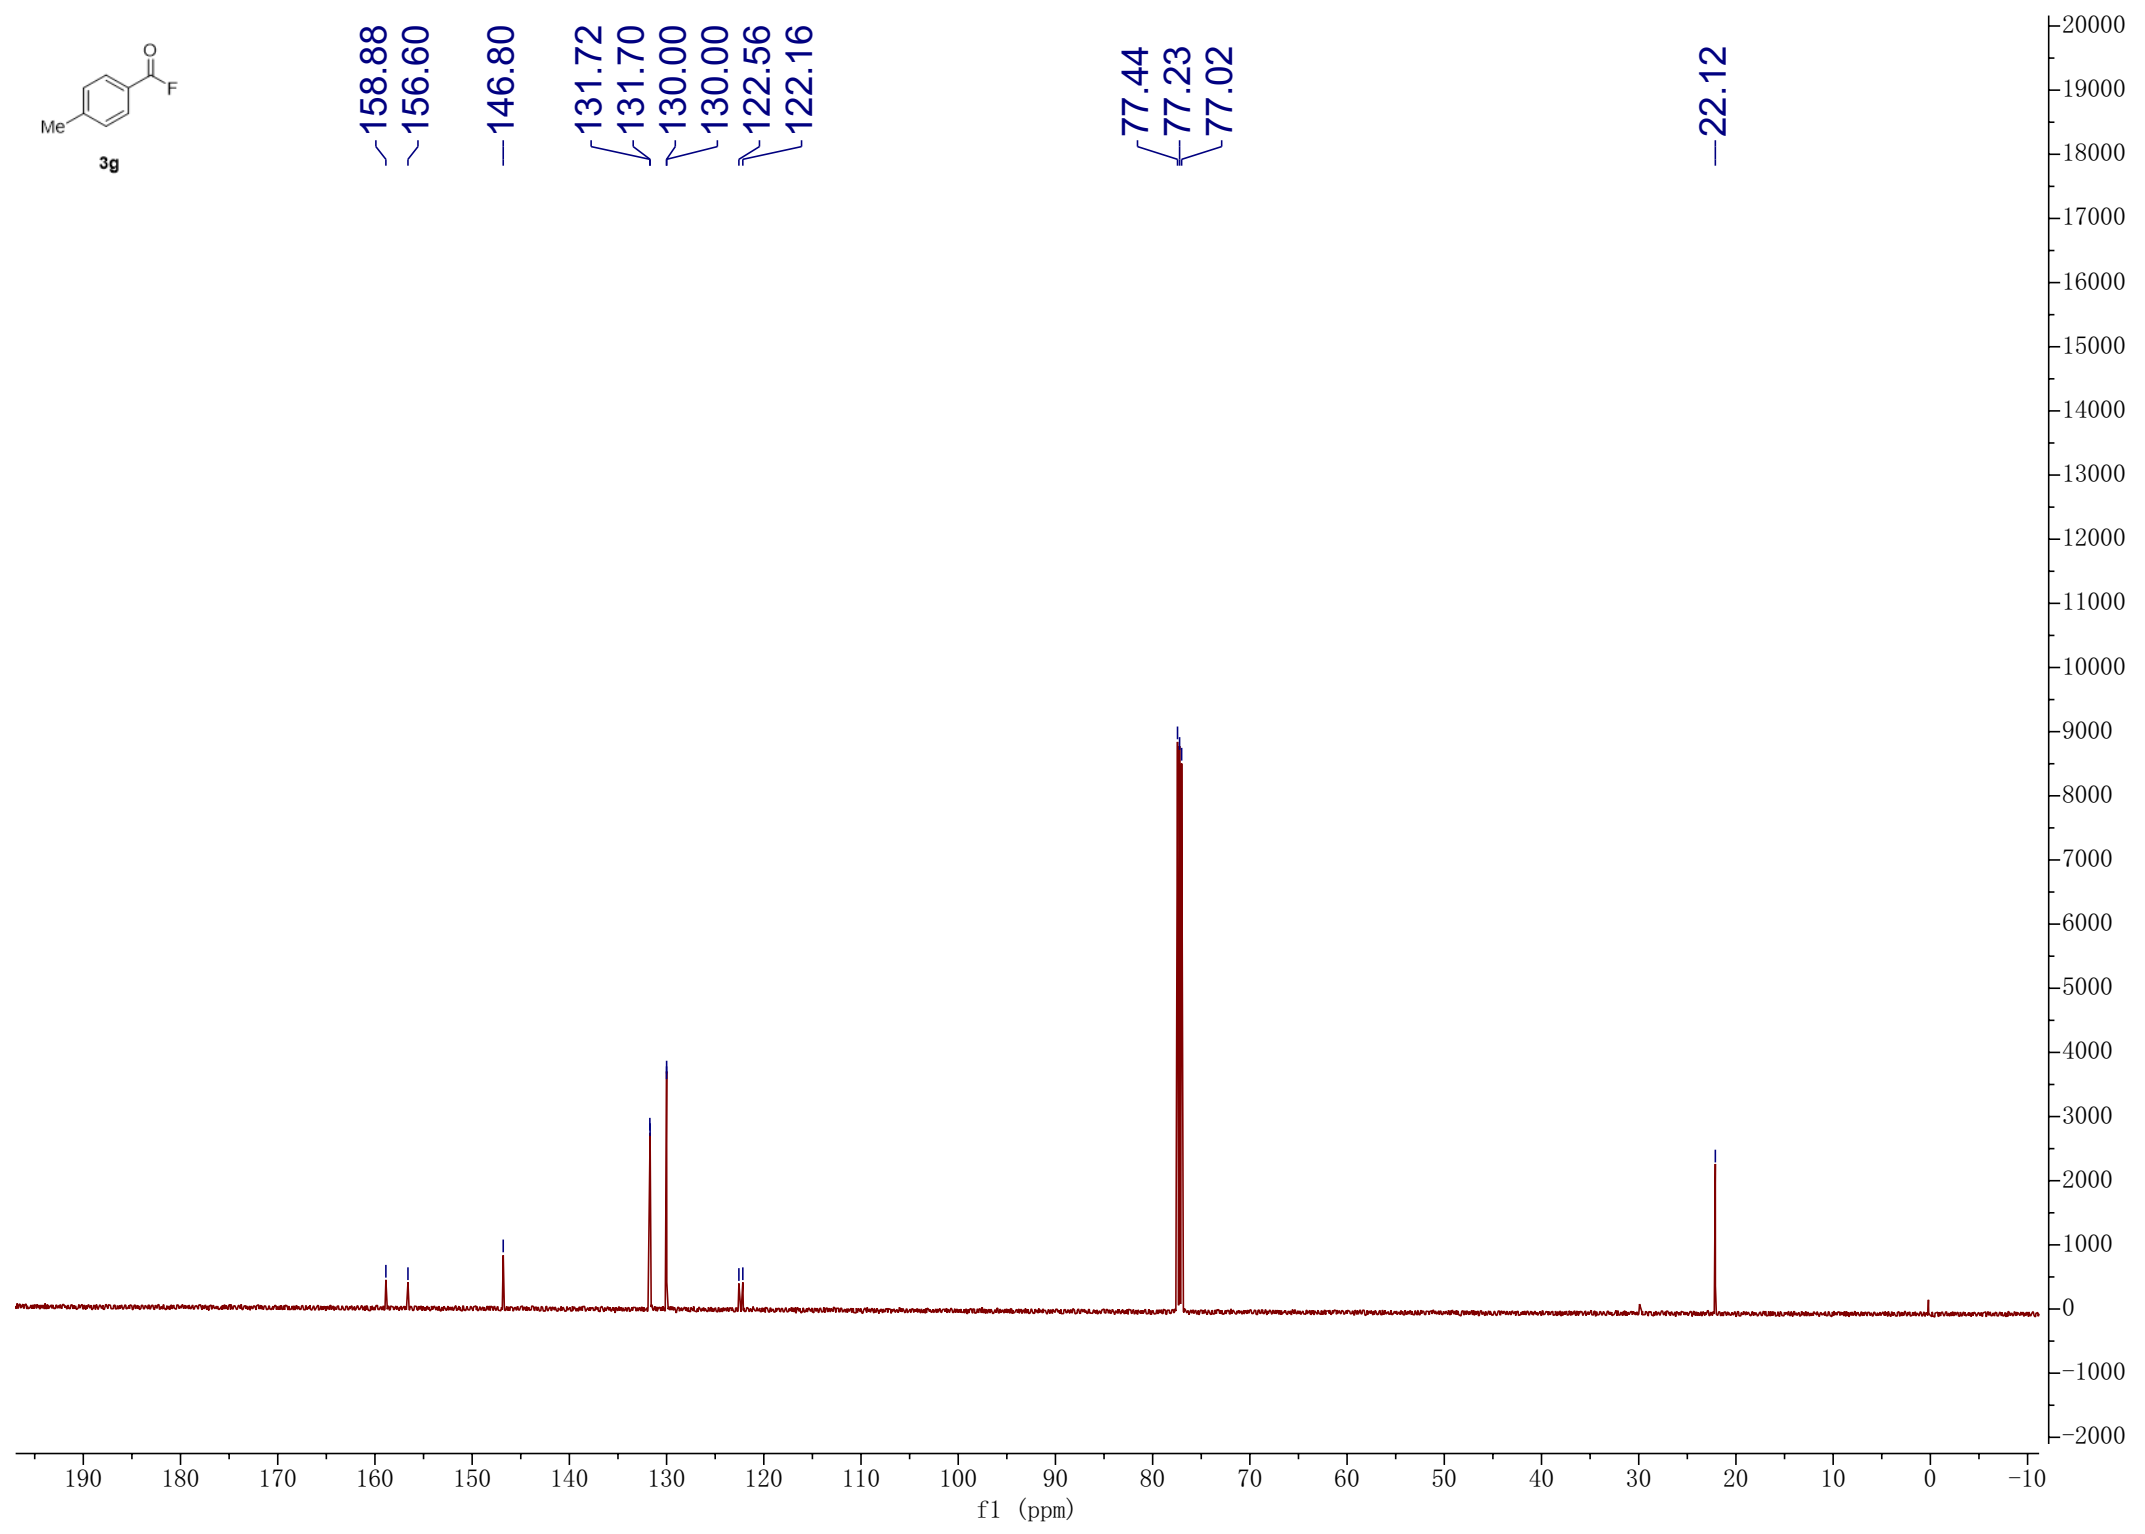

17.377

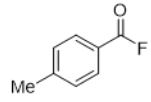

3g

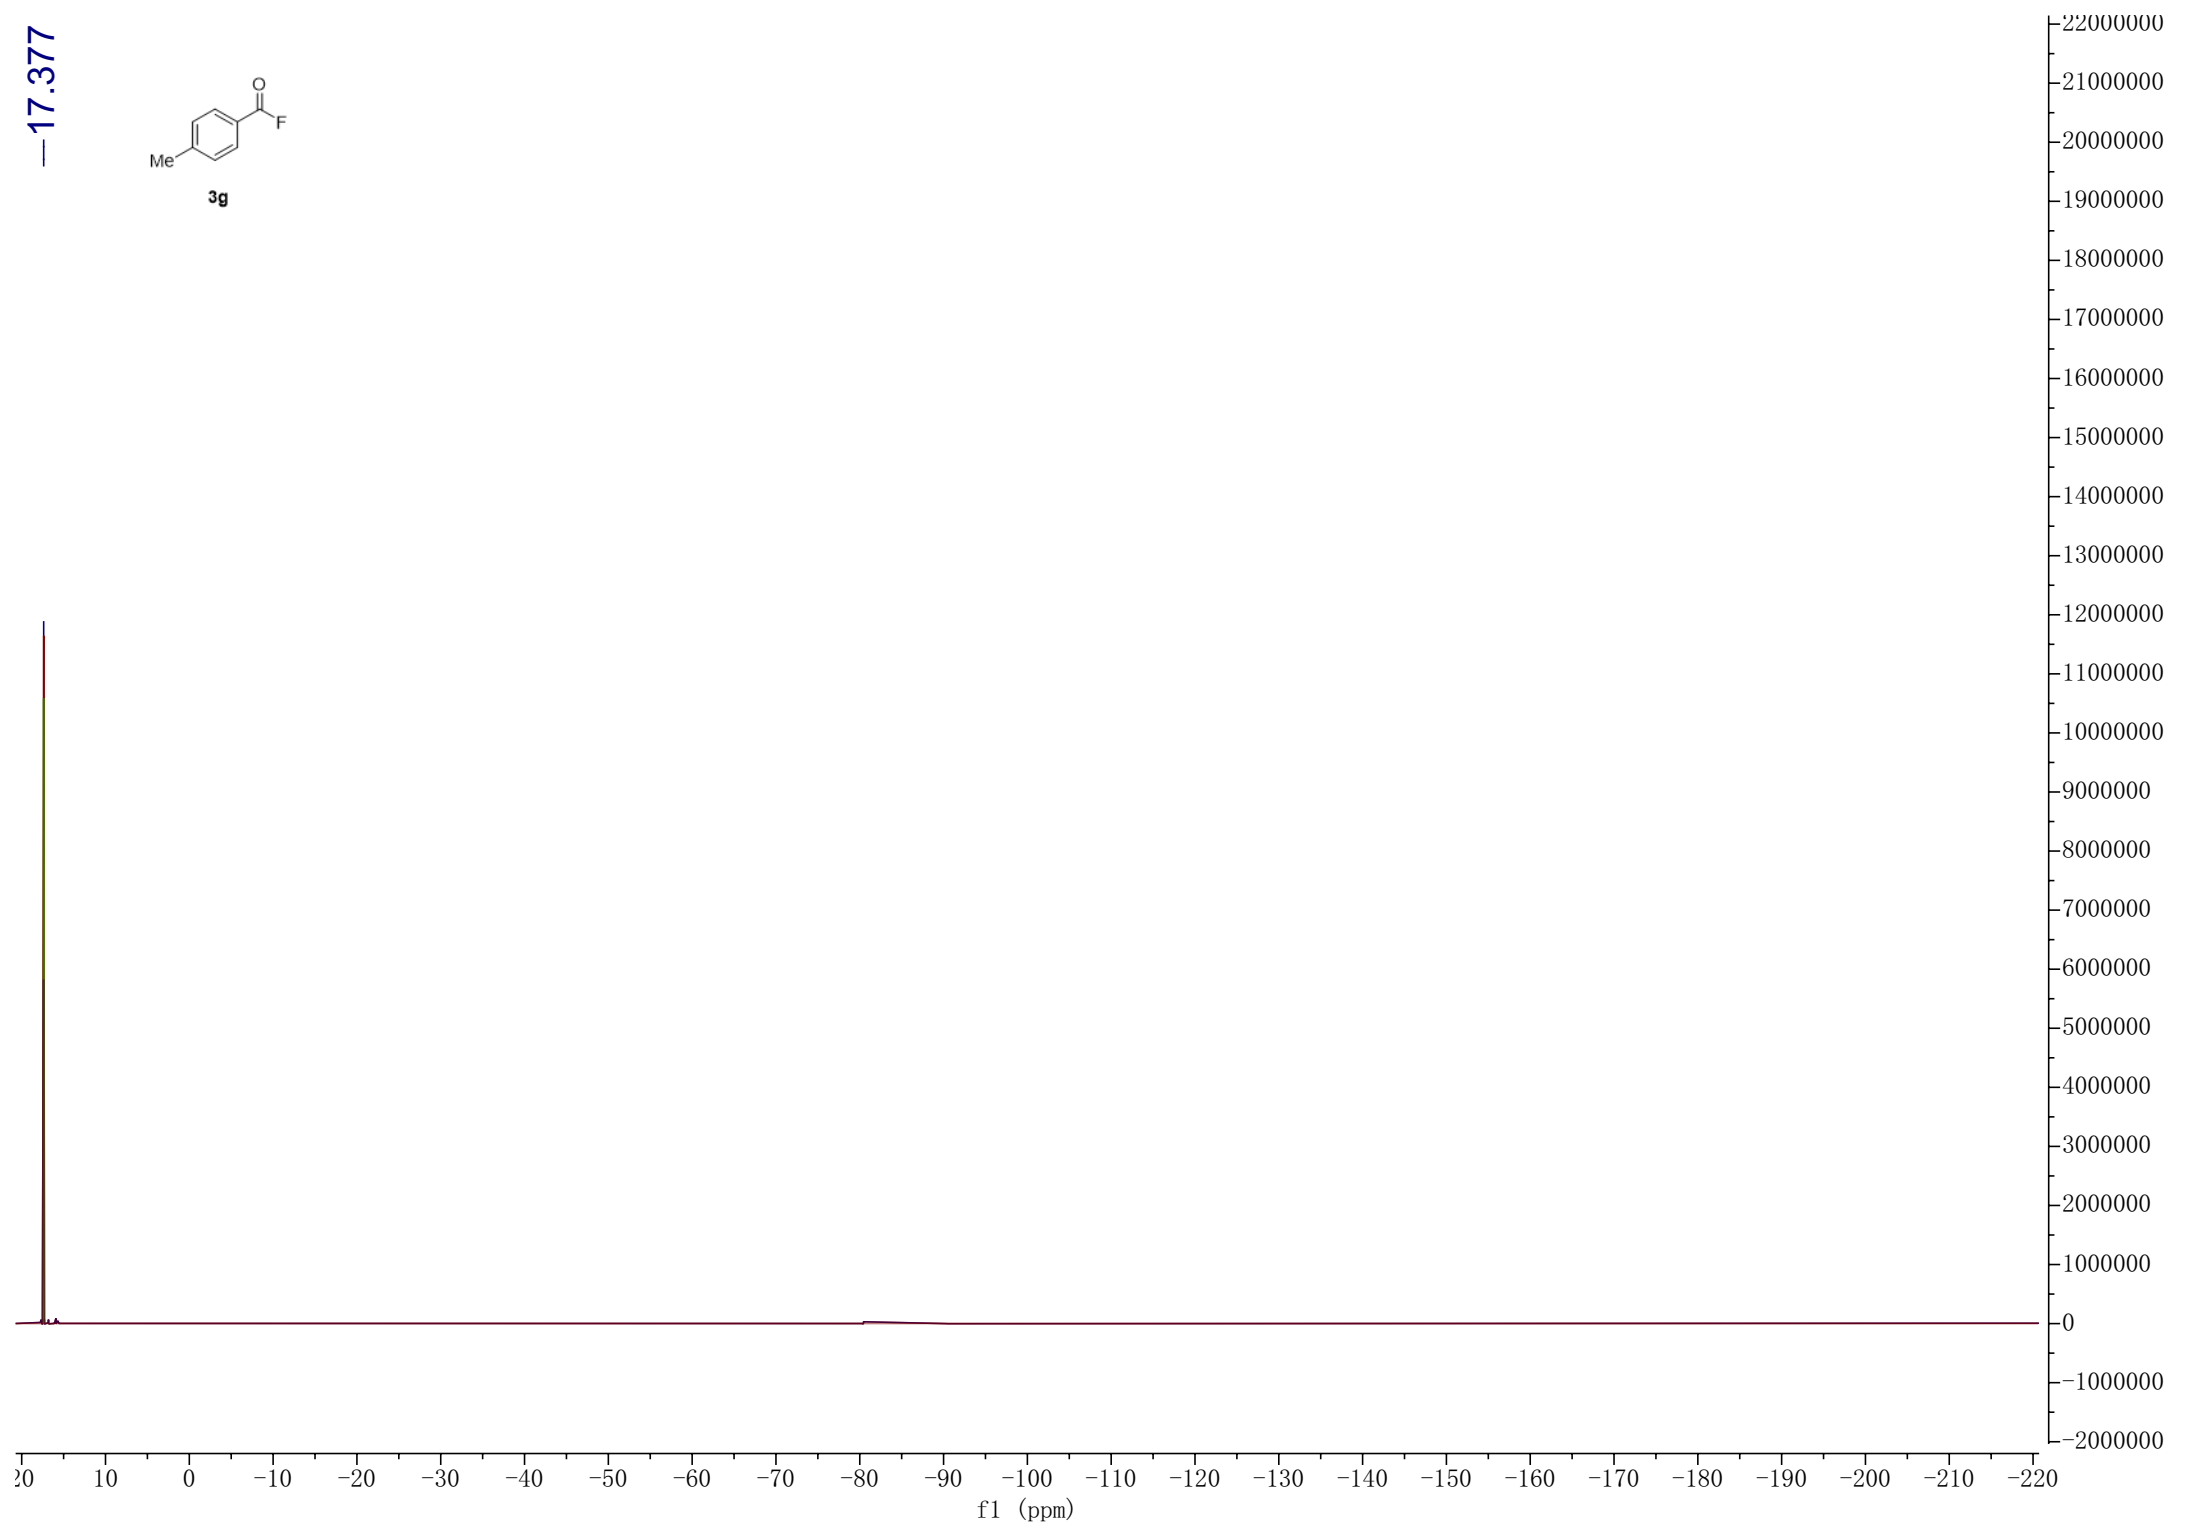

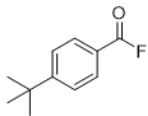

3h

7.977  
7.962  
7.547  
7.534  
7.260

1.359

2.00

2.00

9.05

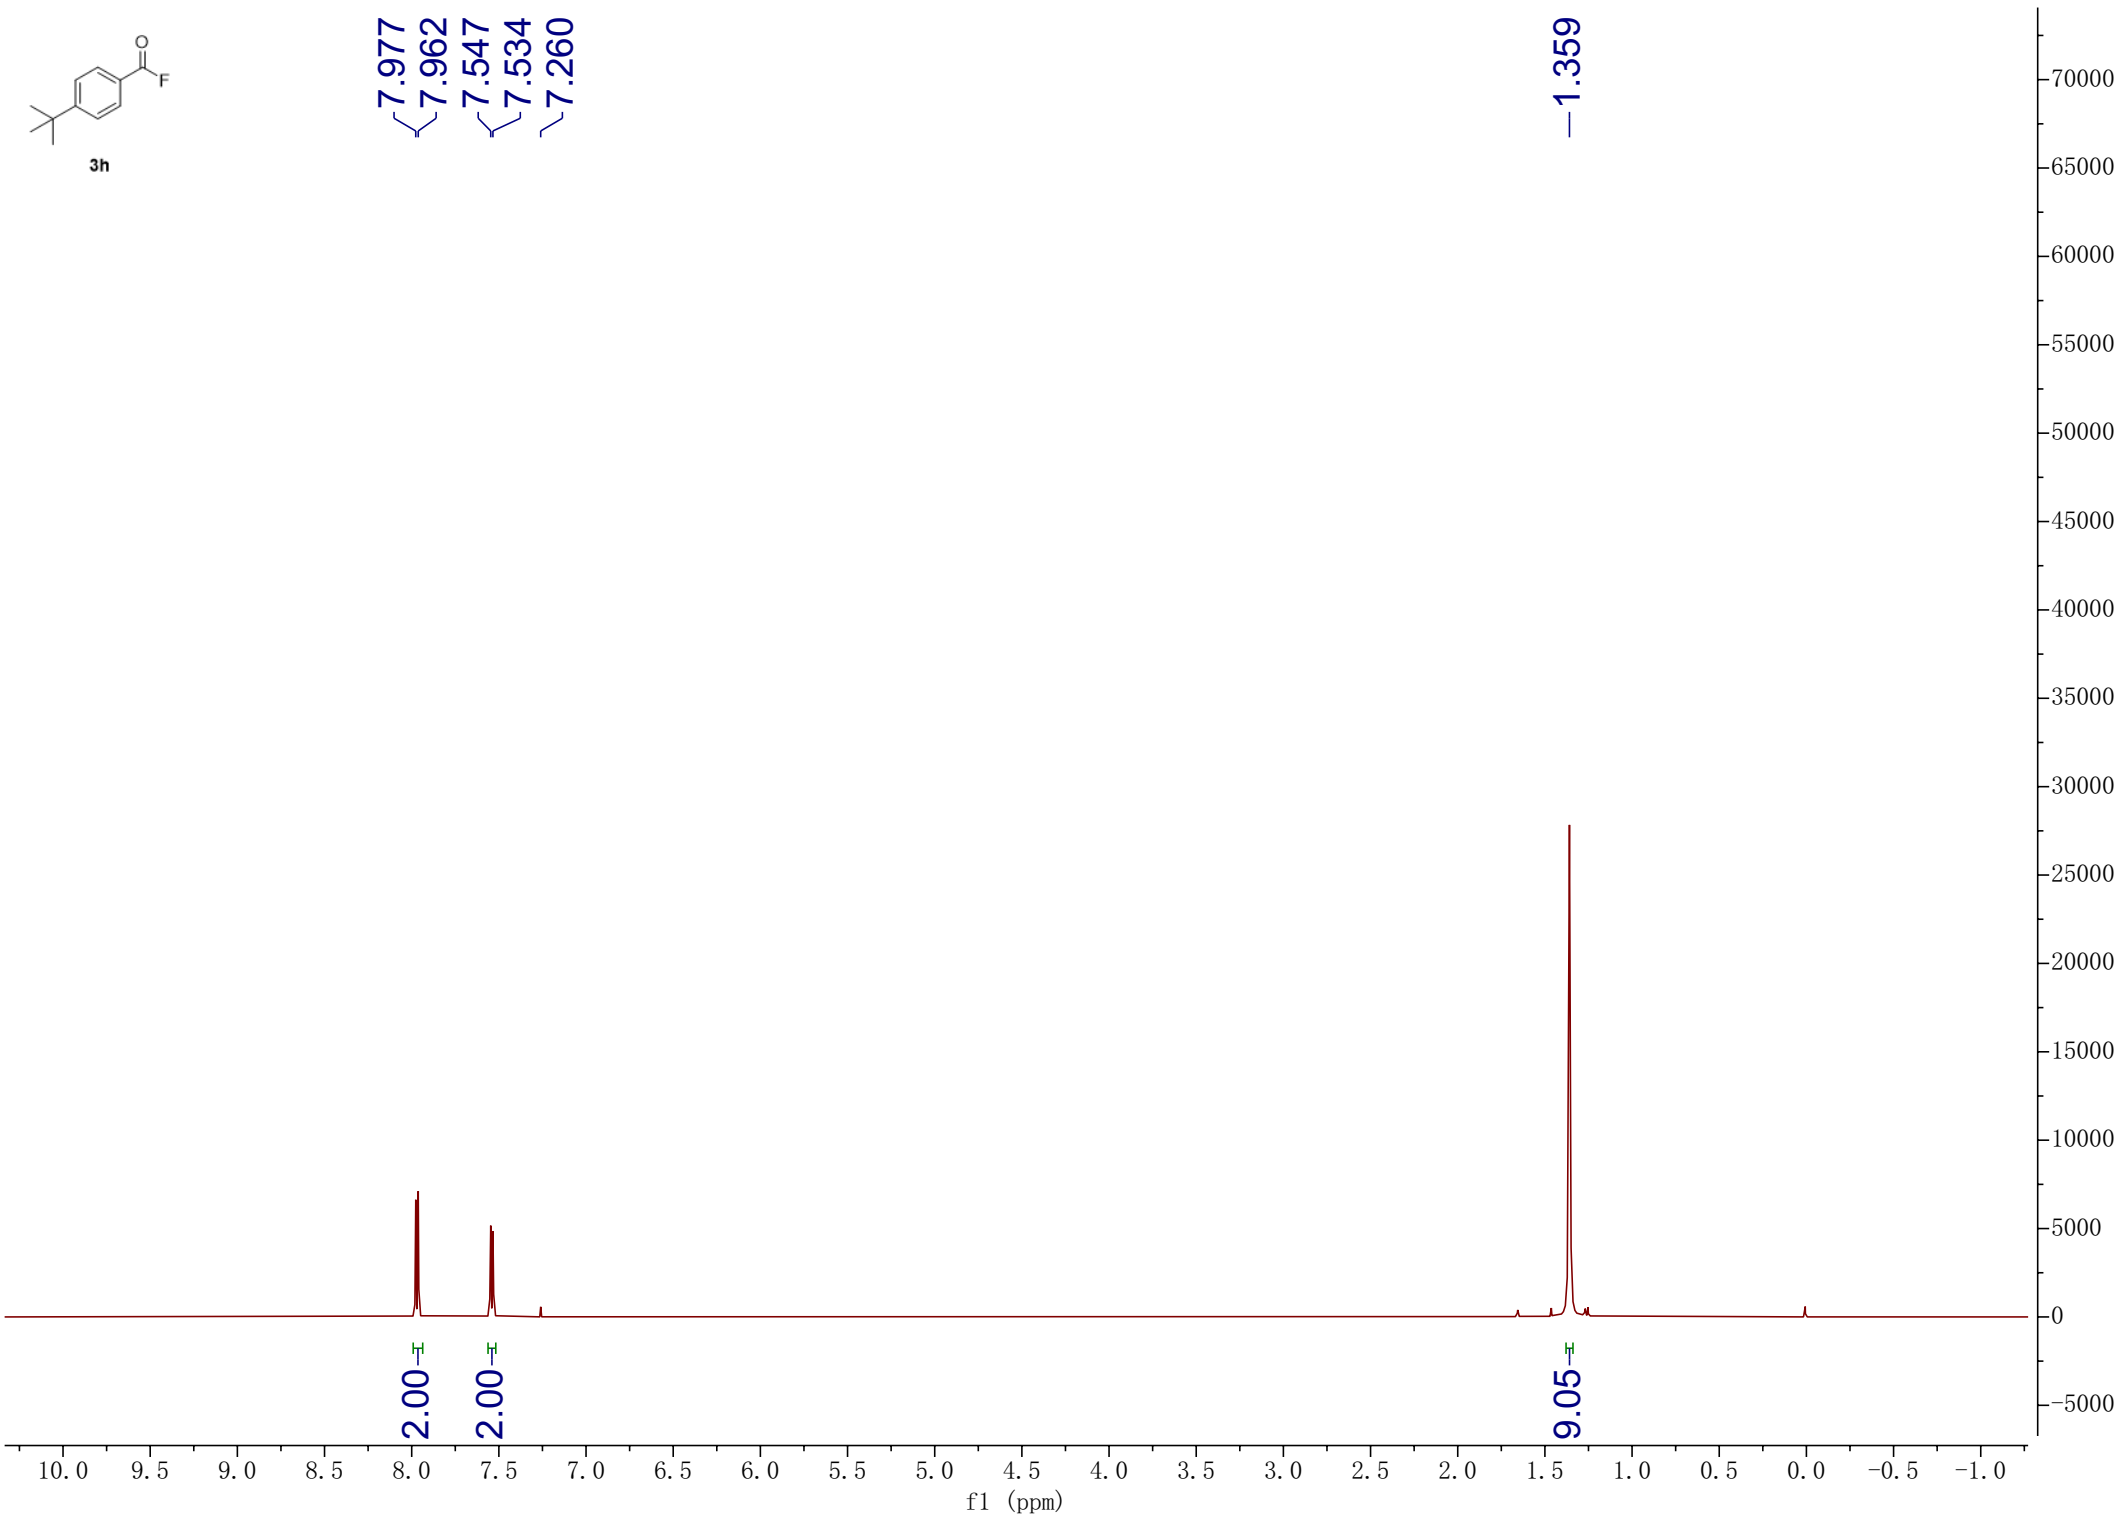



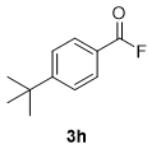

159.68  
158.75  
156.48

131.57  
131.54  
126.28  
122.45  
122.04

77.44  
77.23  
77.02

-35.57  
-31.12

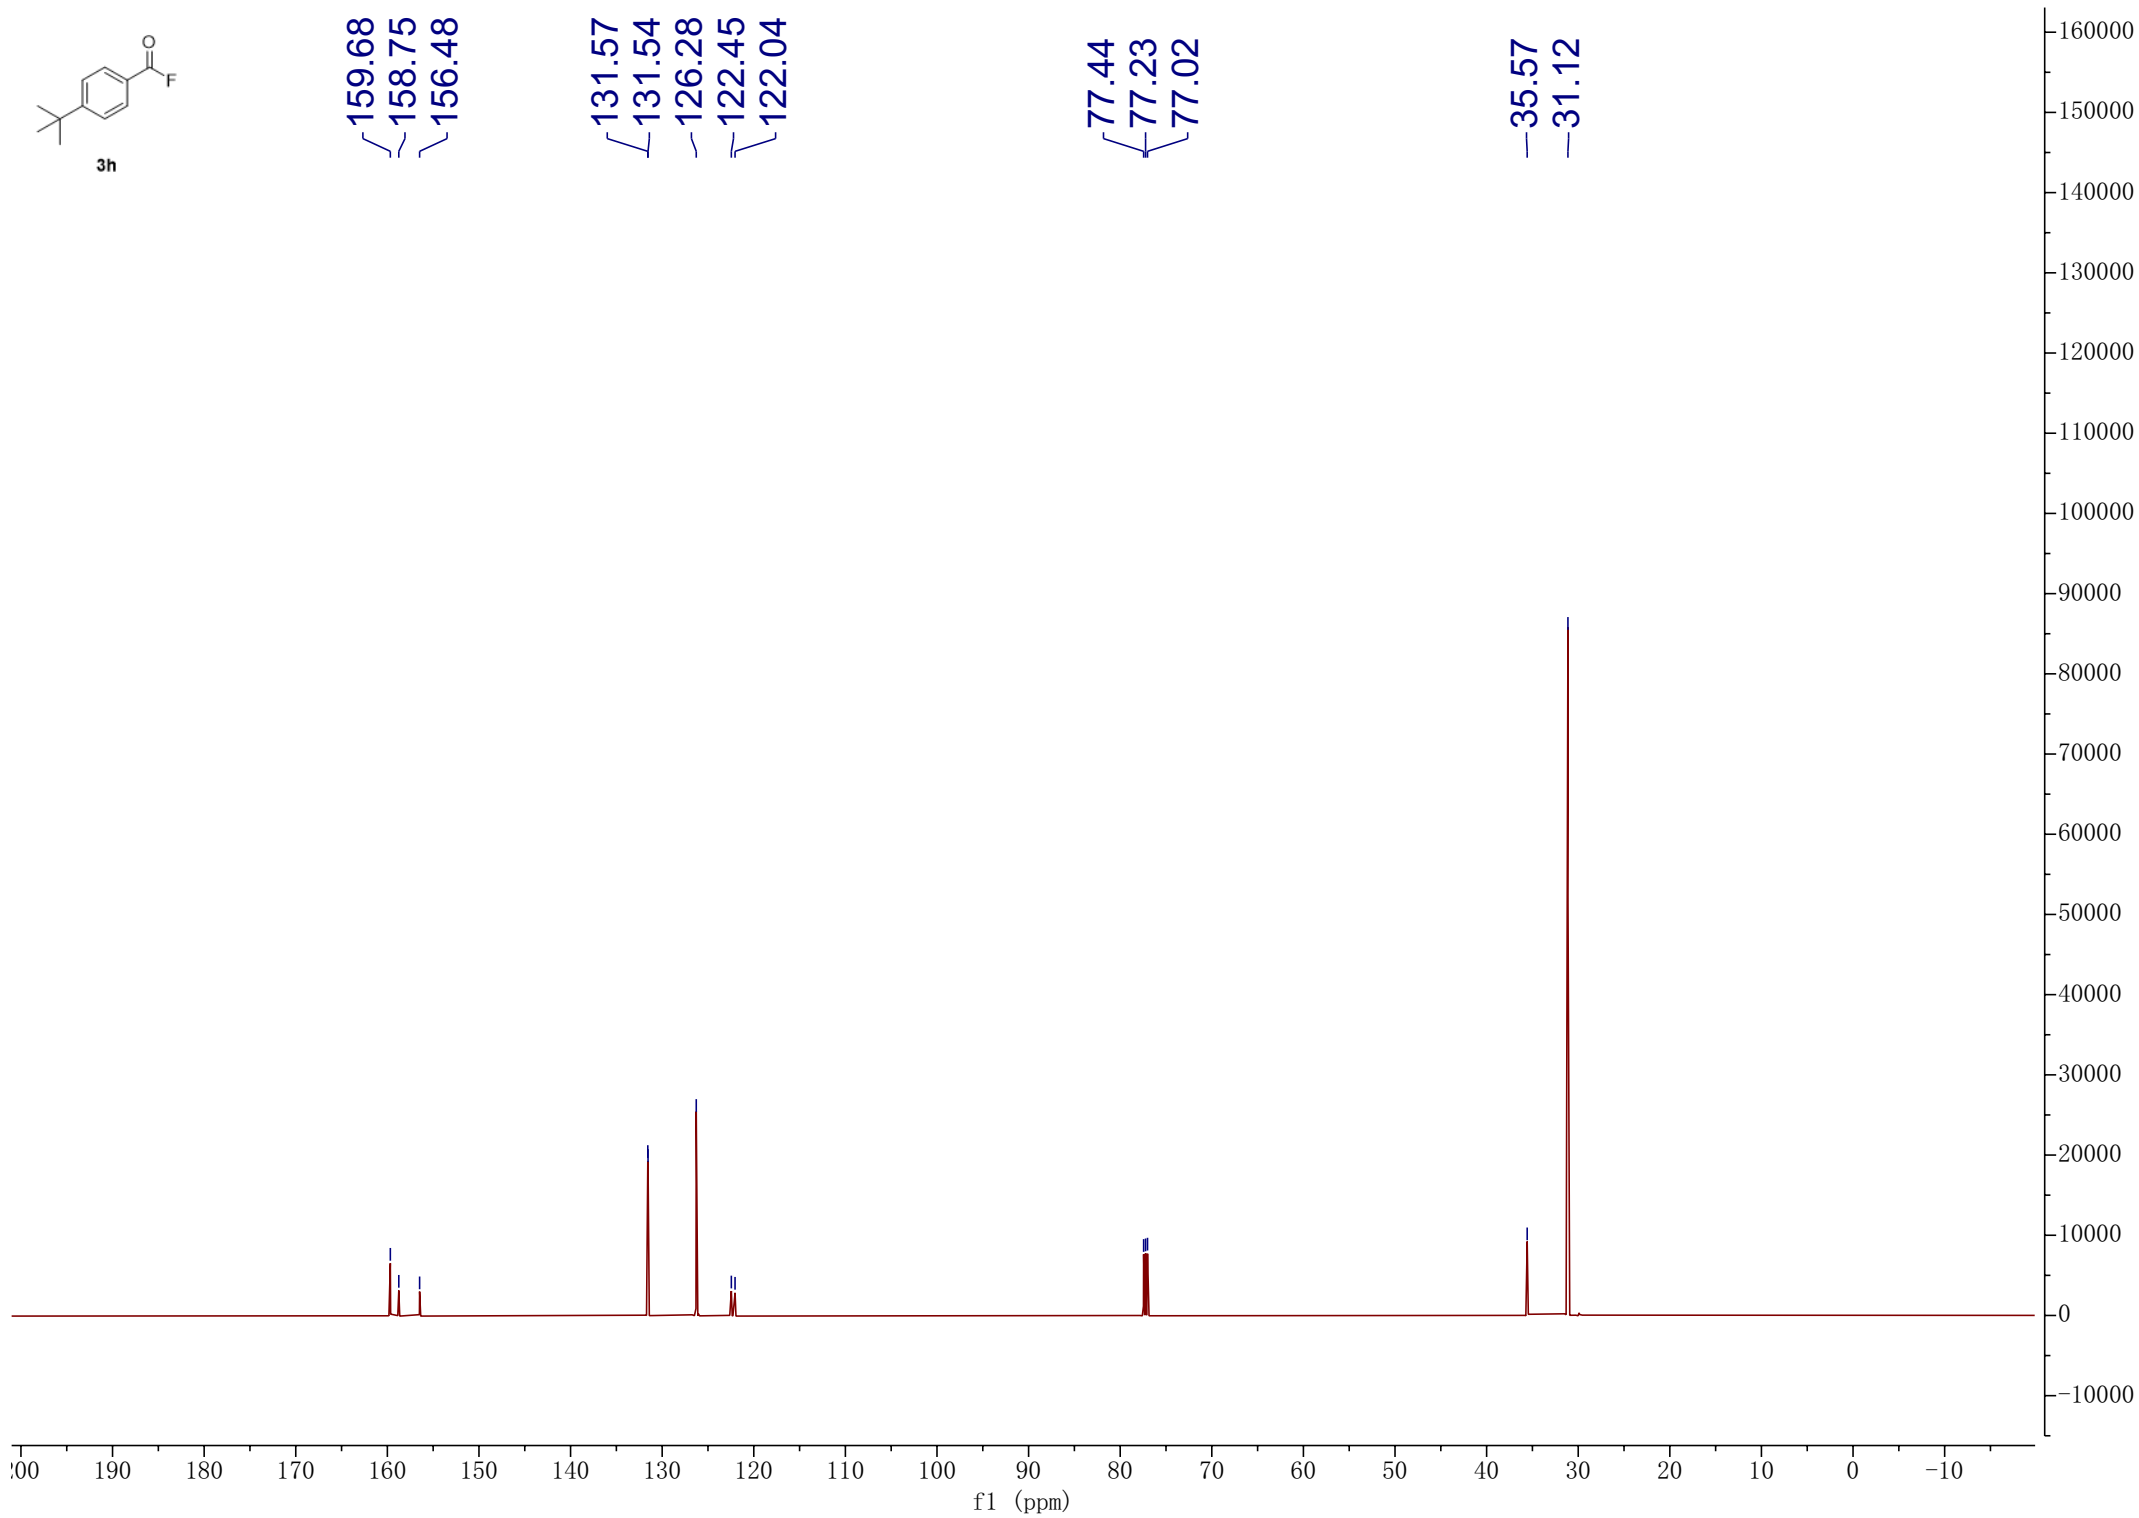

—17.651

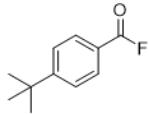

3h

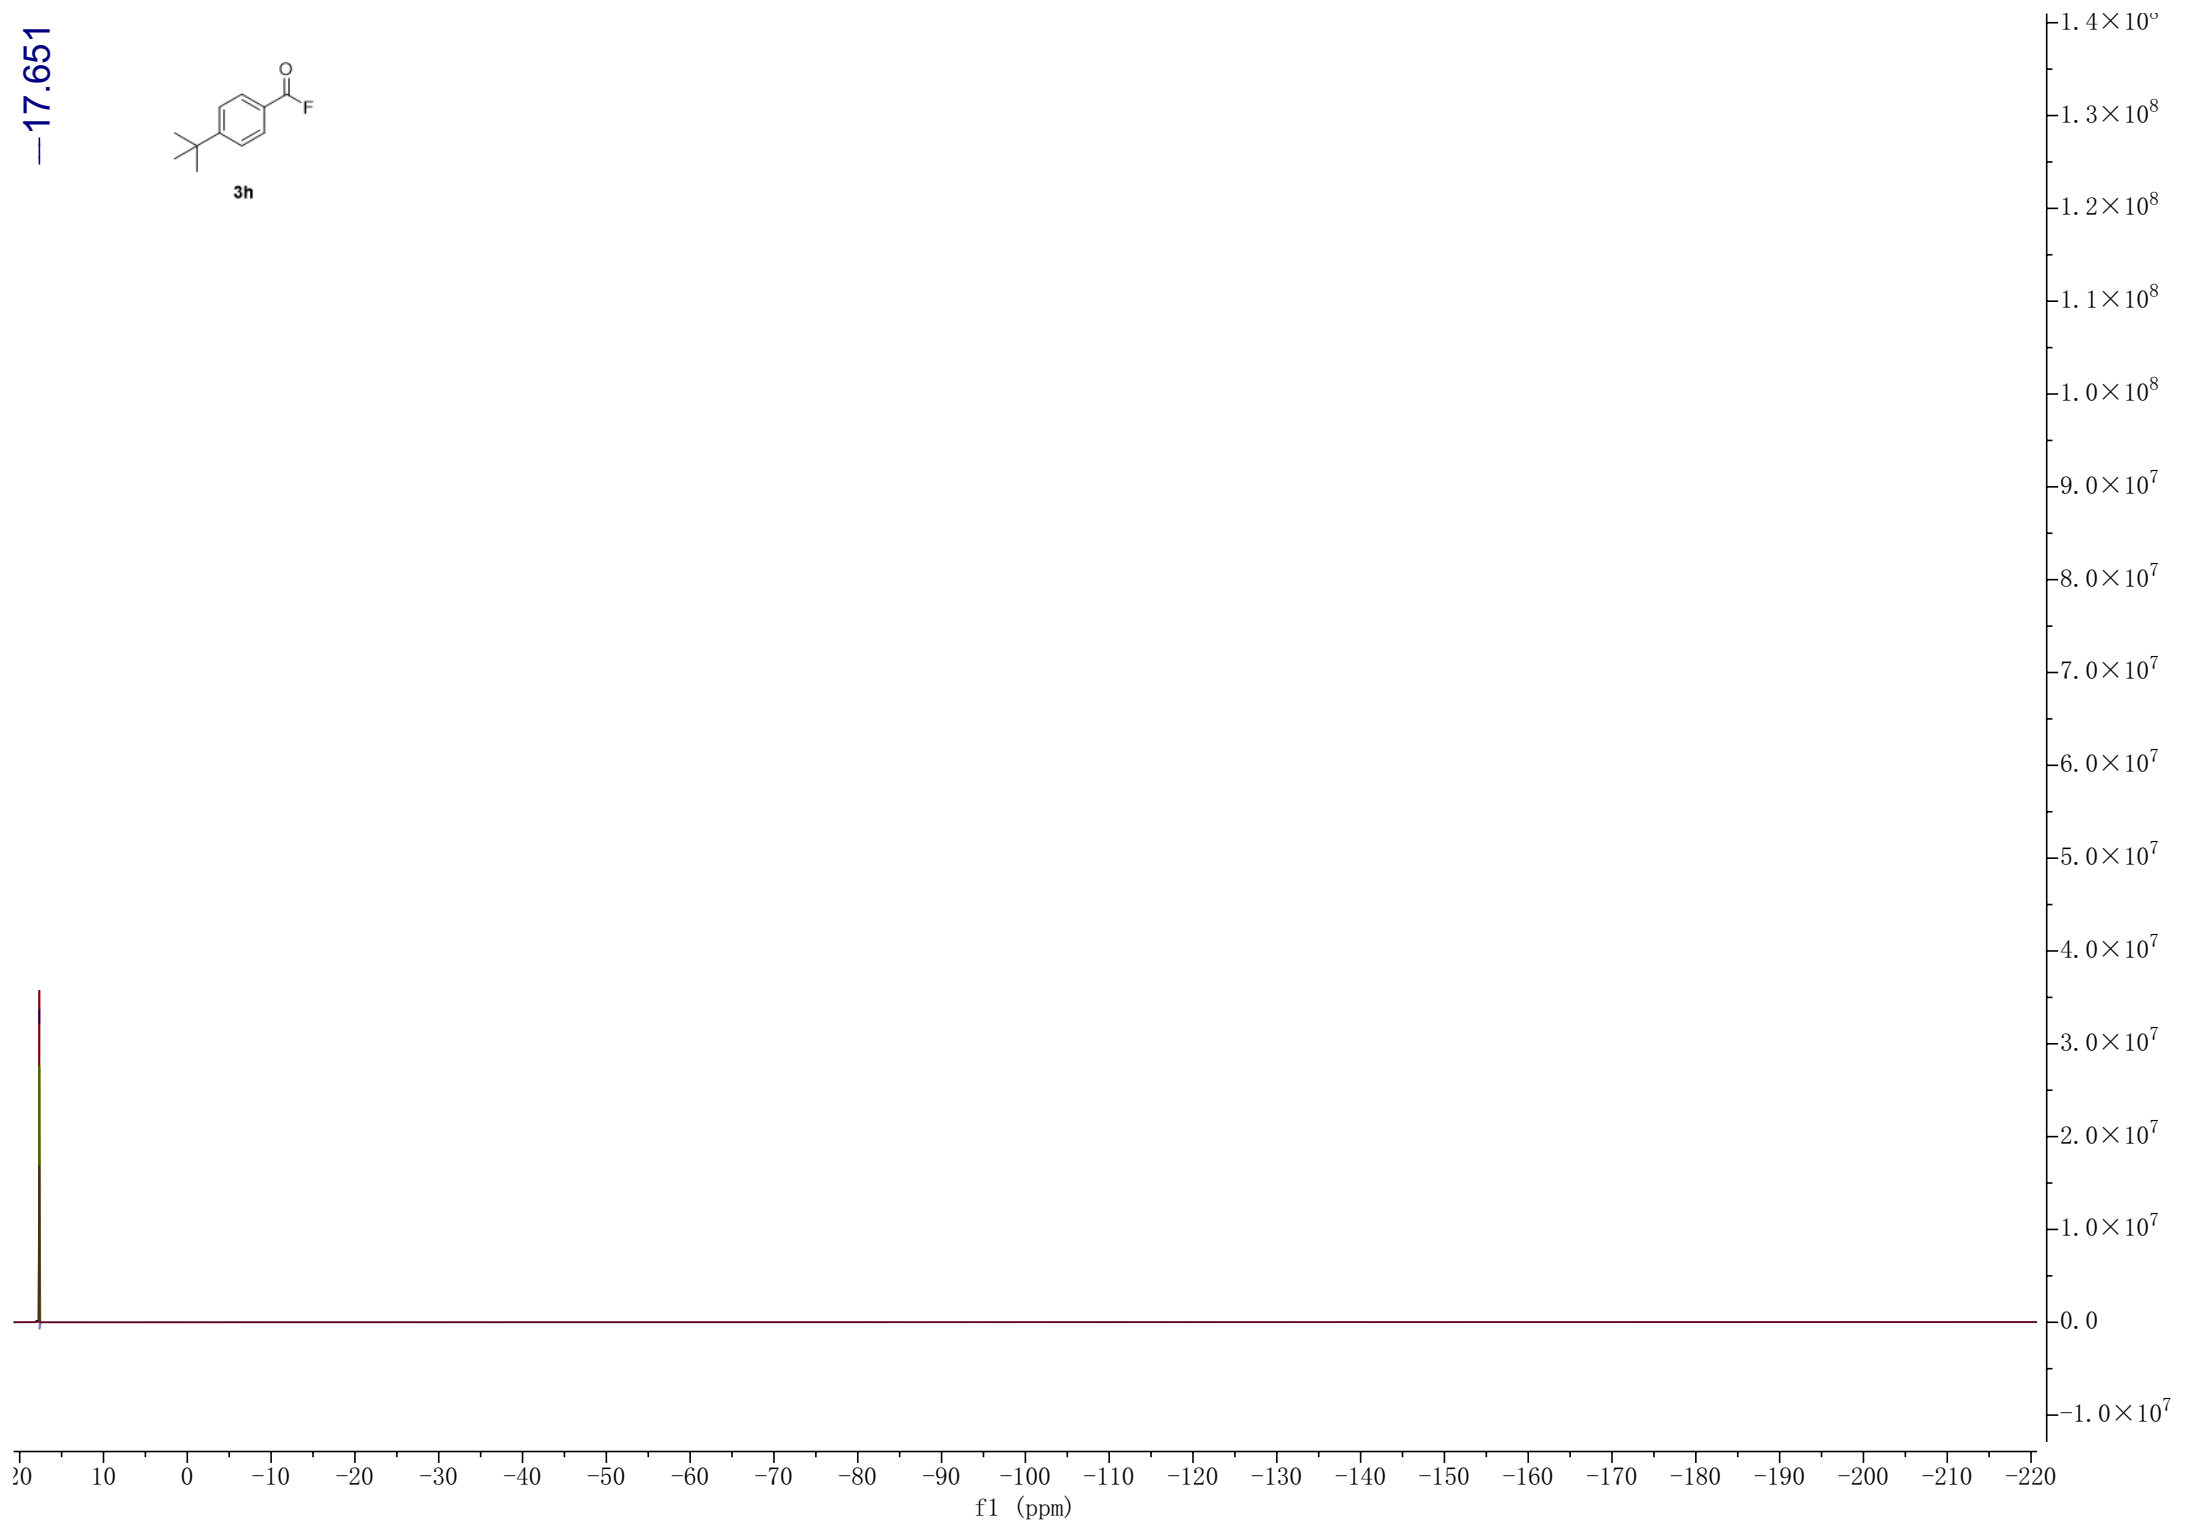

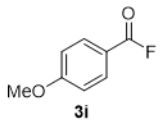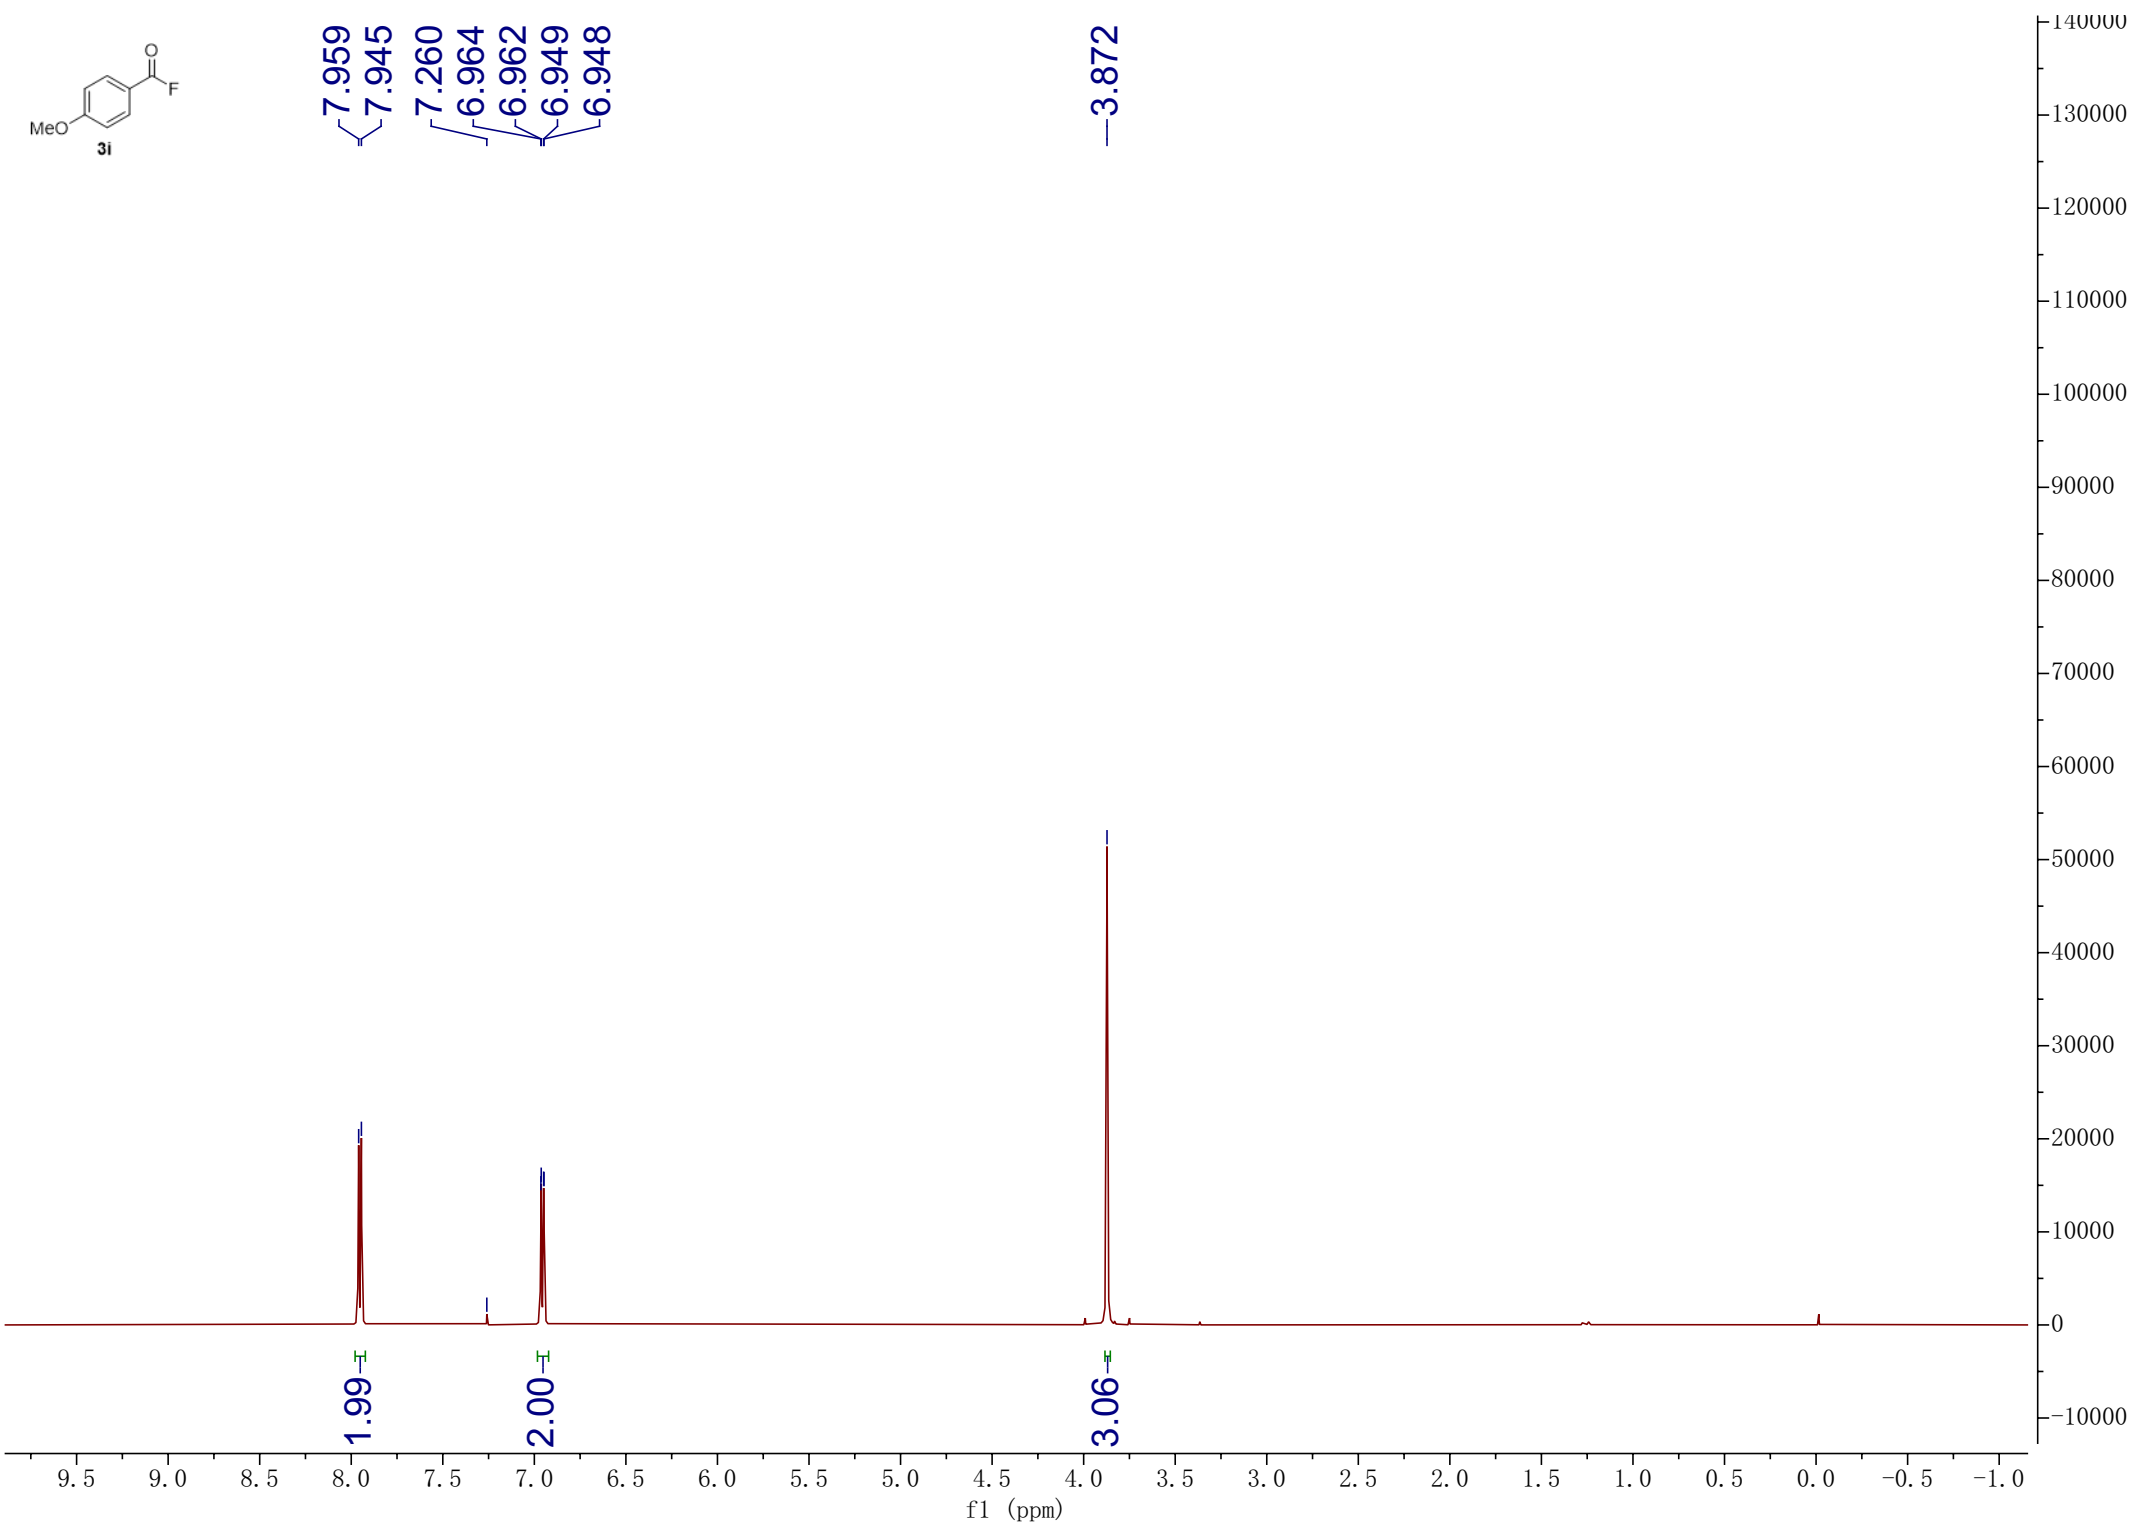

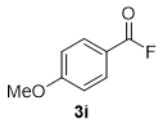

165.40  
158.52  
156.27

133.85  
133.82

117.13  
116.72  
114.57

77.44  
77.23  
77.02

55.76

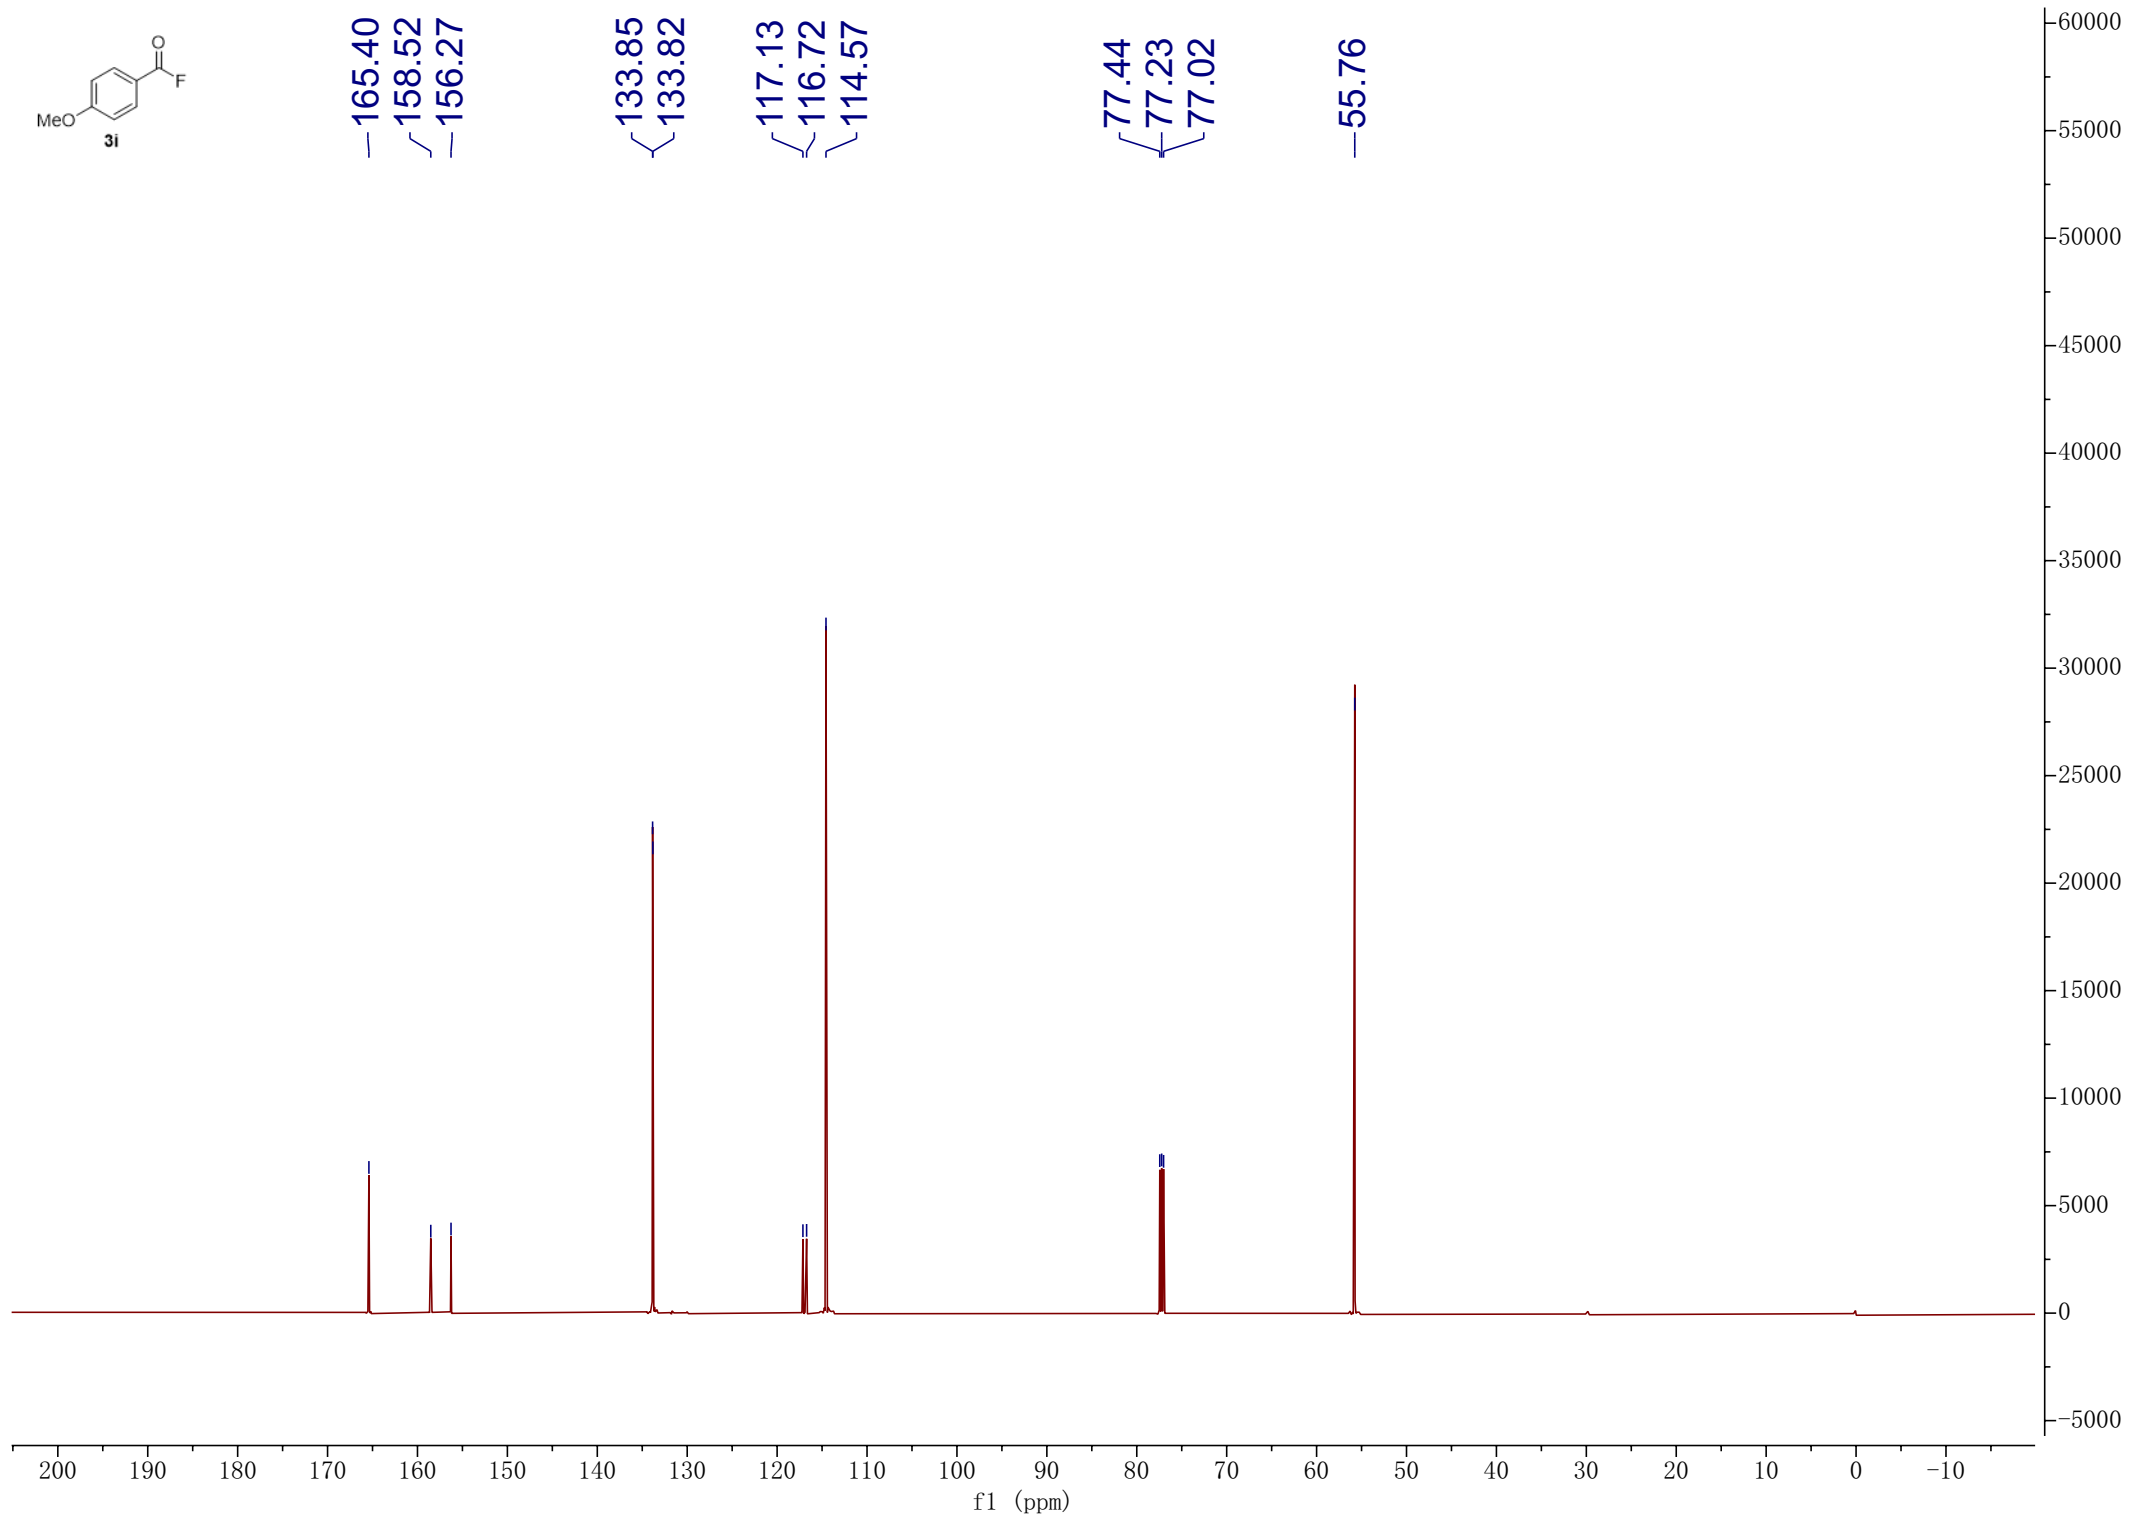

—15.881

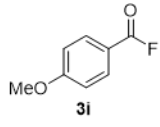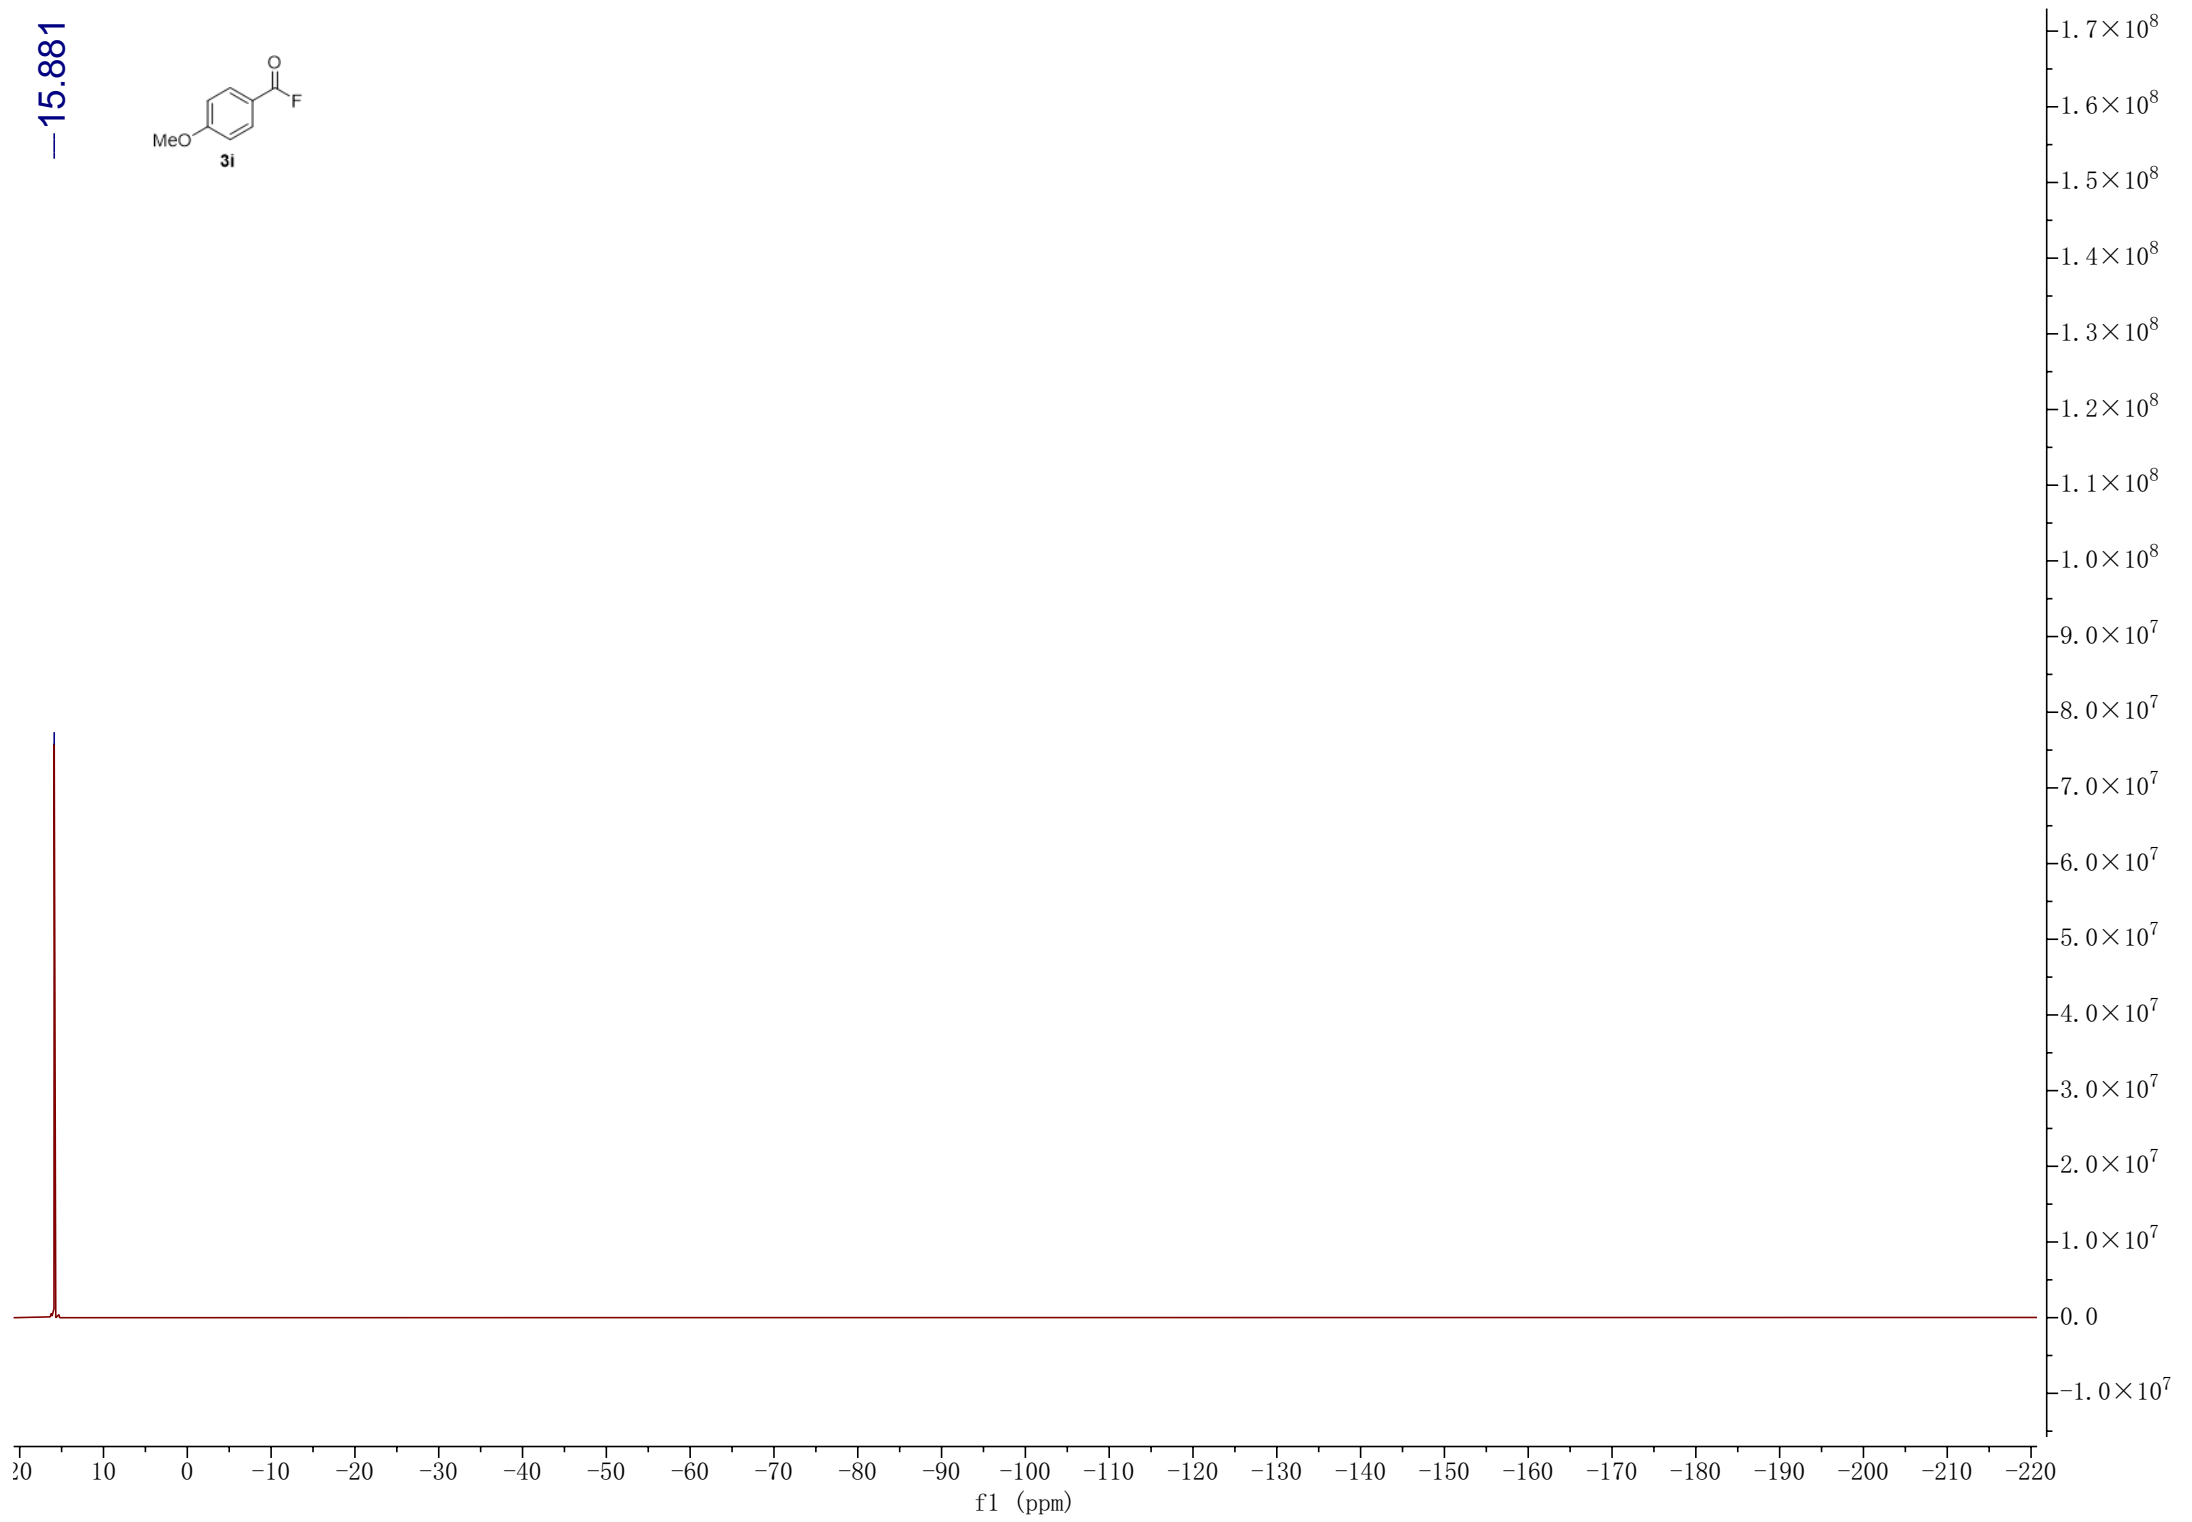

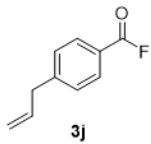

7.975  
7.961  
7.354  
7.340  
7.260  
5.988  
5.977  
5.972  
5.966  
5.960  
5.949  
5.943  
5.938  
5.932  
5.921  
5.907  
5.164  
5.161  
5.159  
5.157  
5.147  
5.145  
5.142  
5.139  
5.136  
5.111  
5.108  
3.487  
3.476

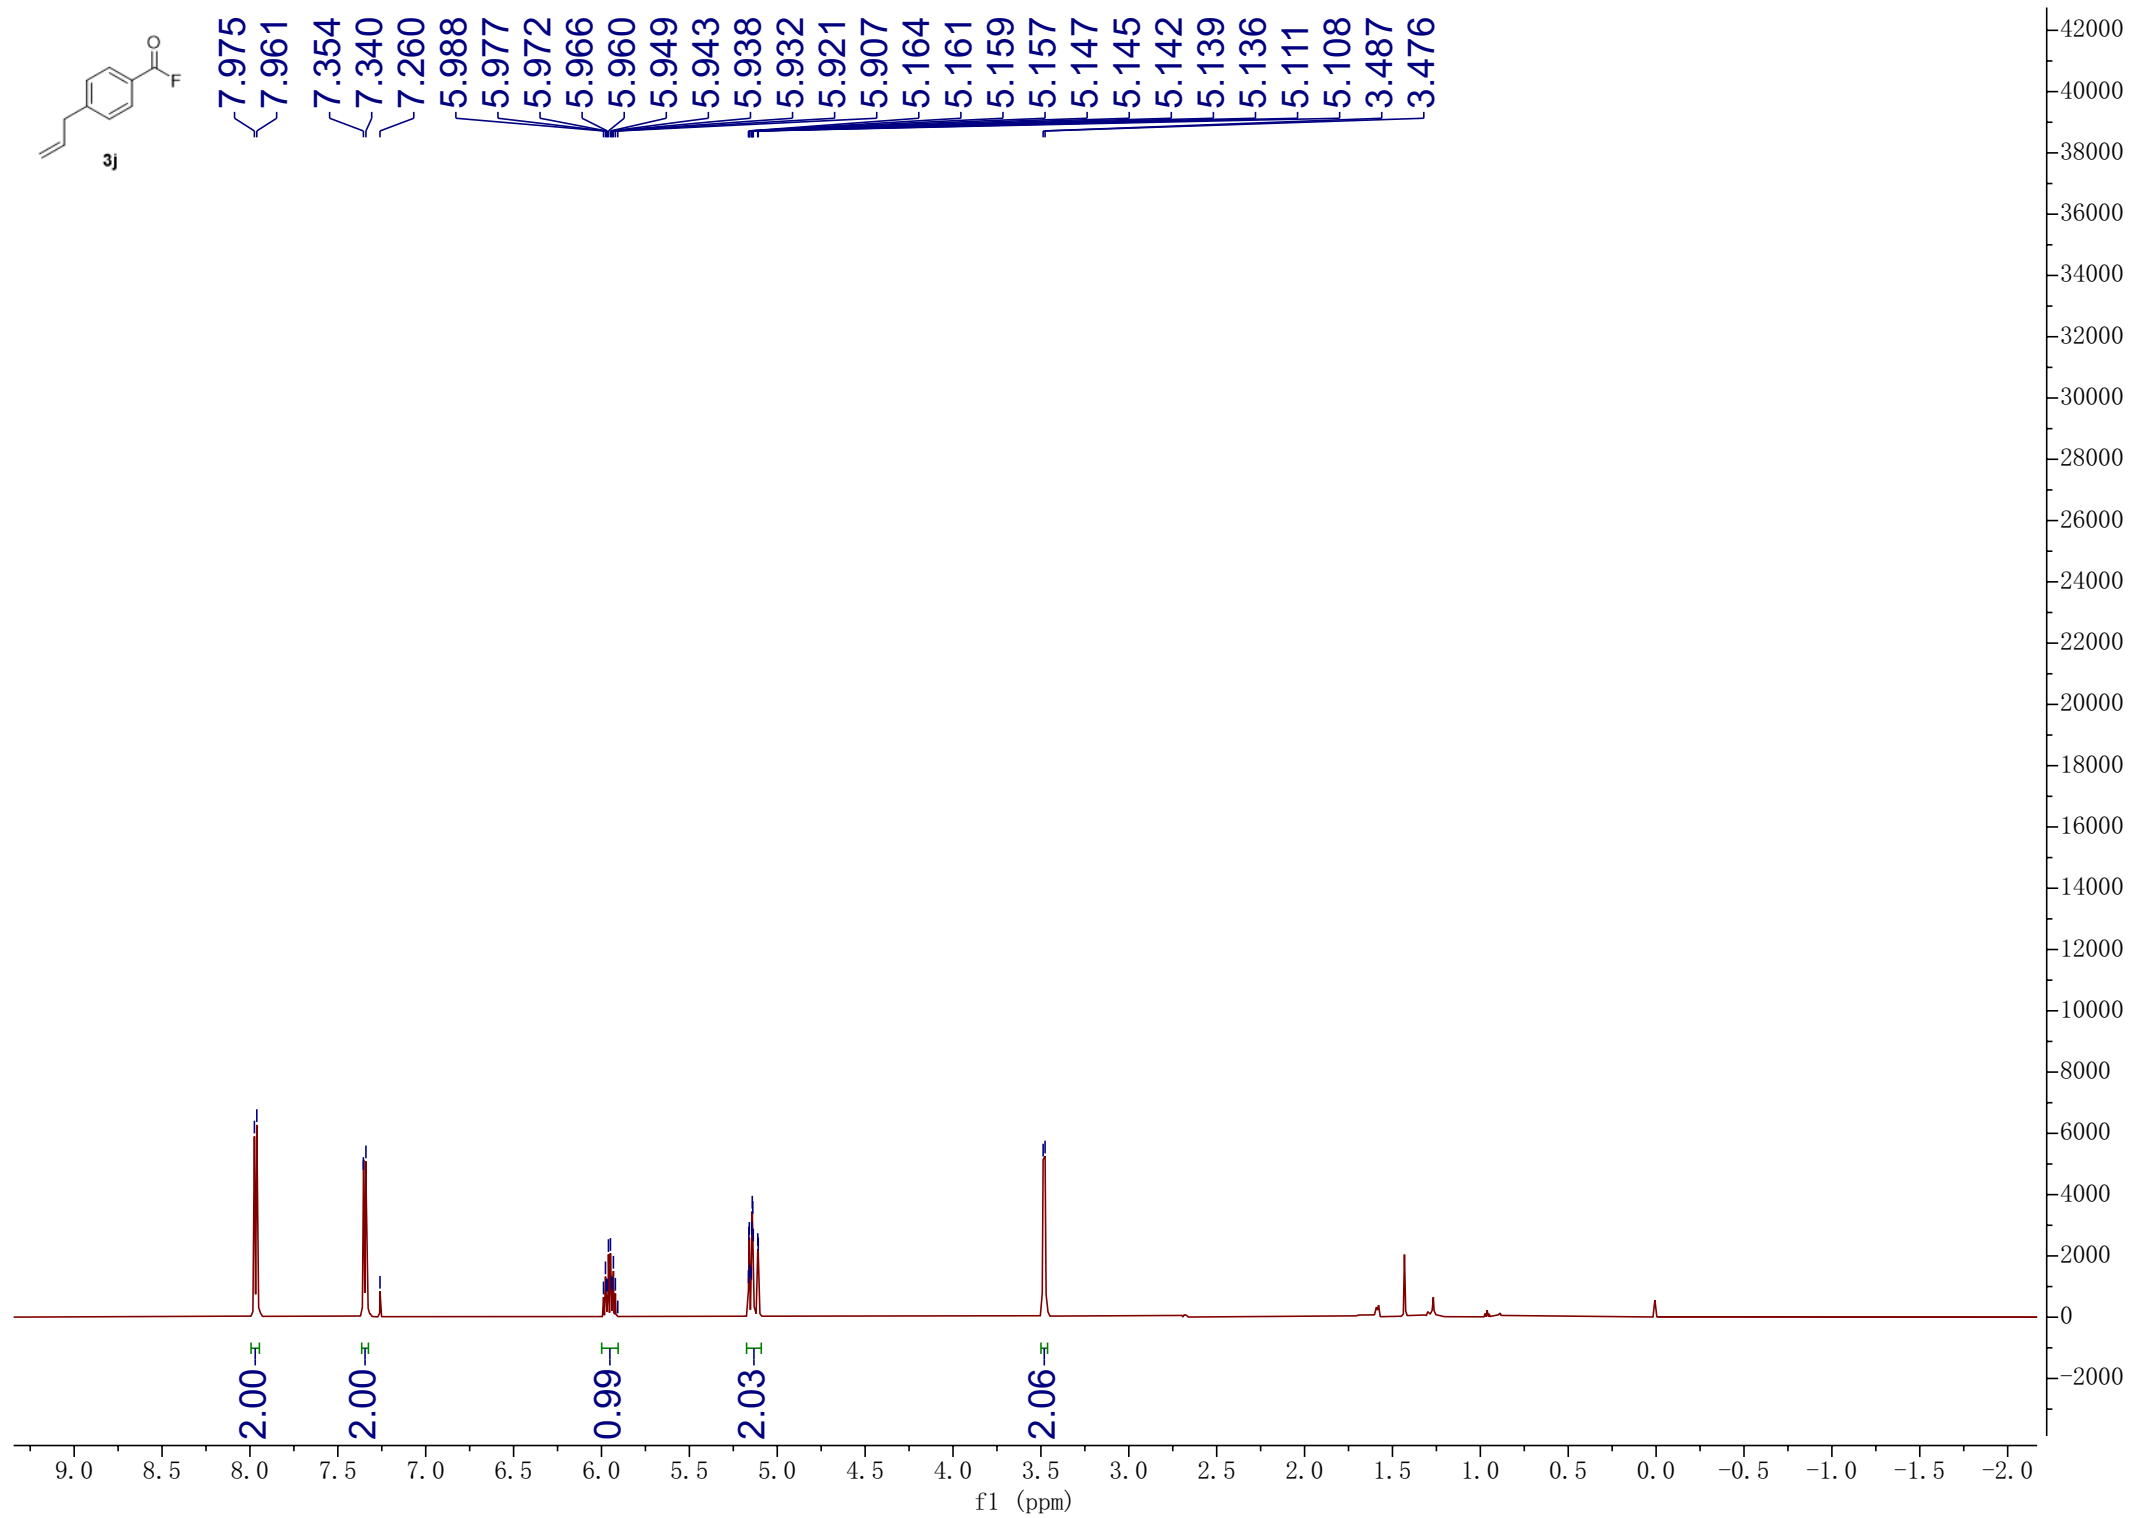

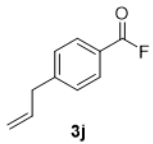

158.72  
156.45  
148.68  
135.87  
131.85  
131.82  
129.52  
123.26  
122.86  
117.38

77.44  
77.23  
77.02

40.42

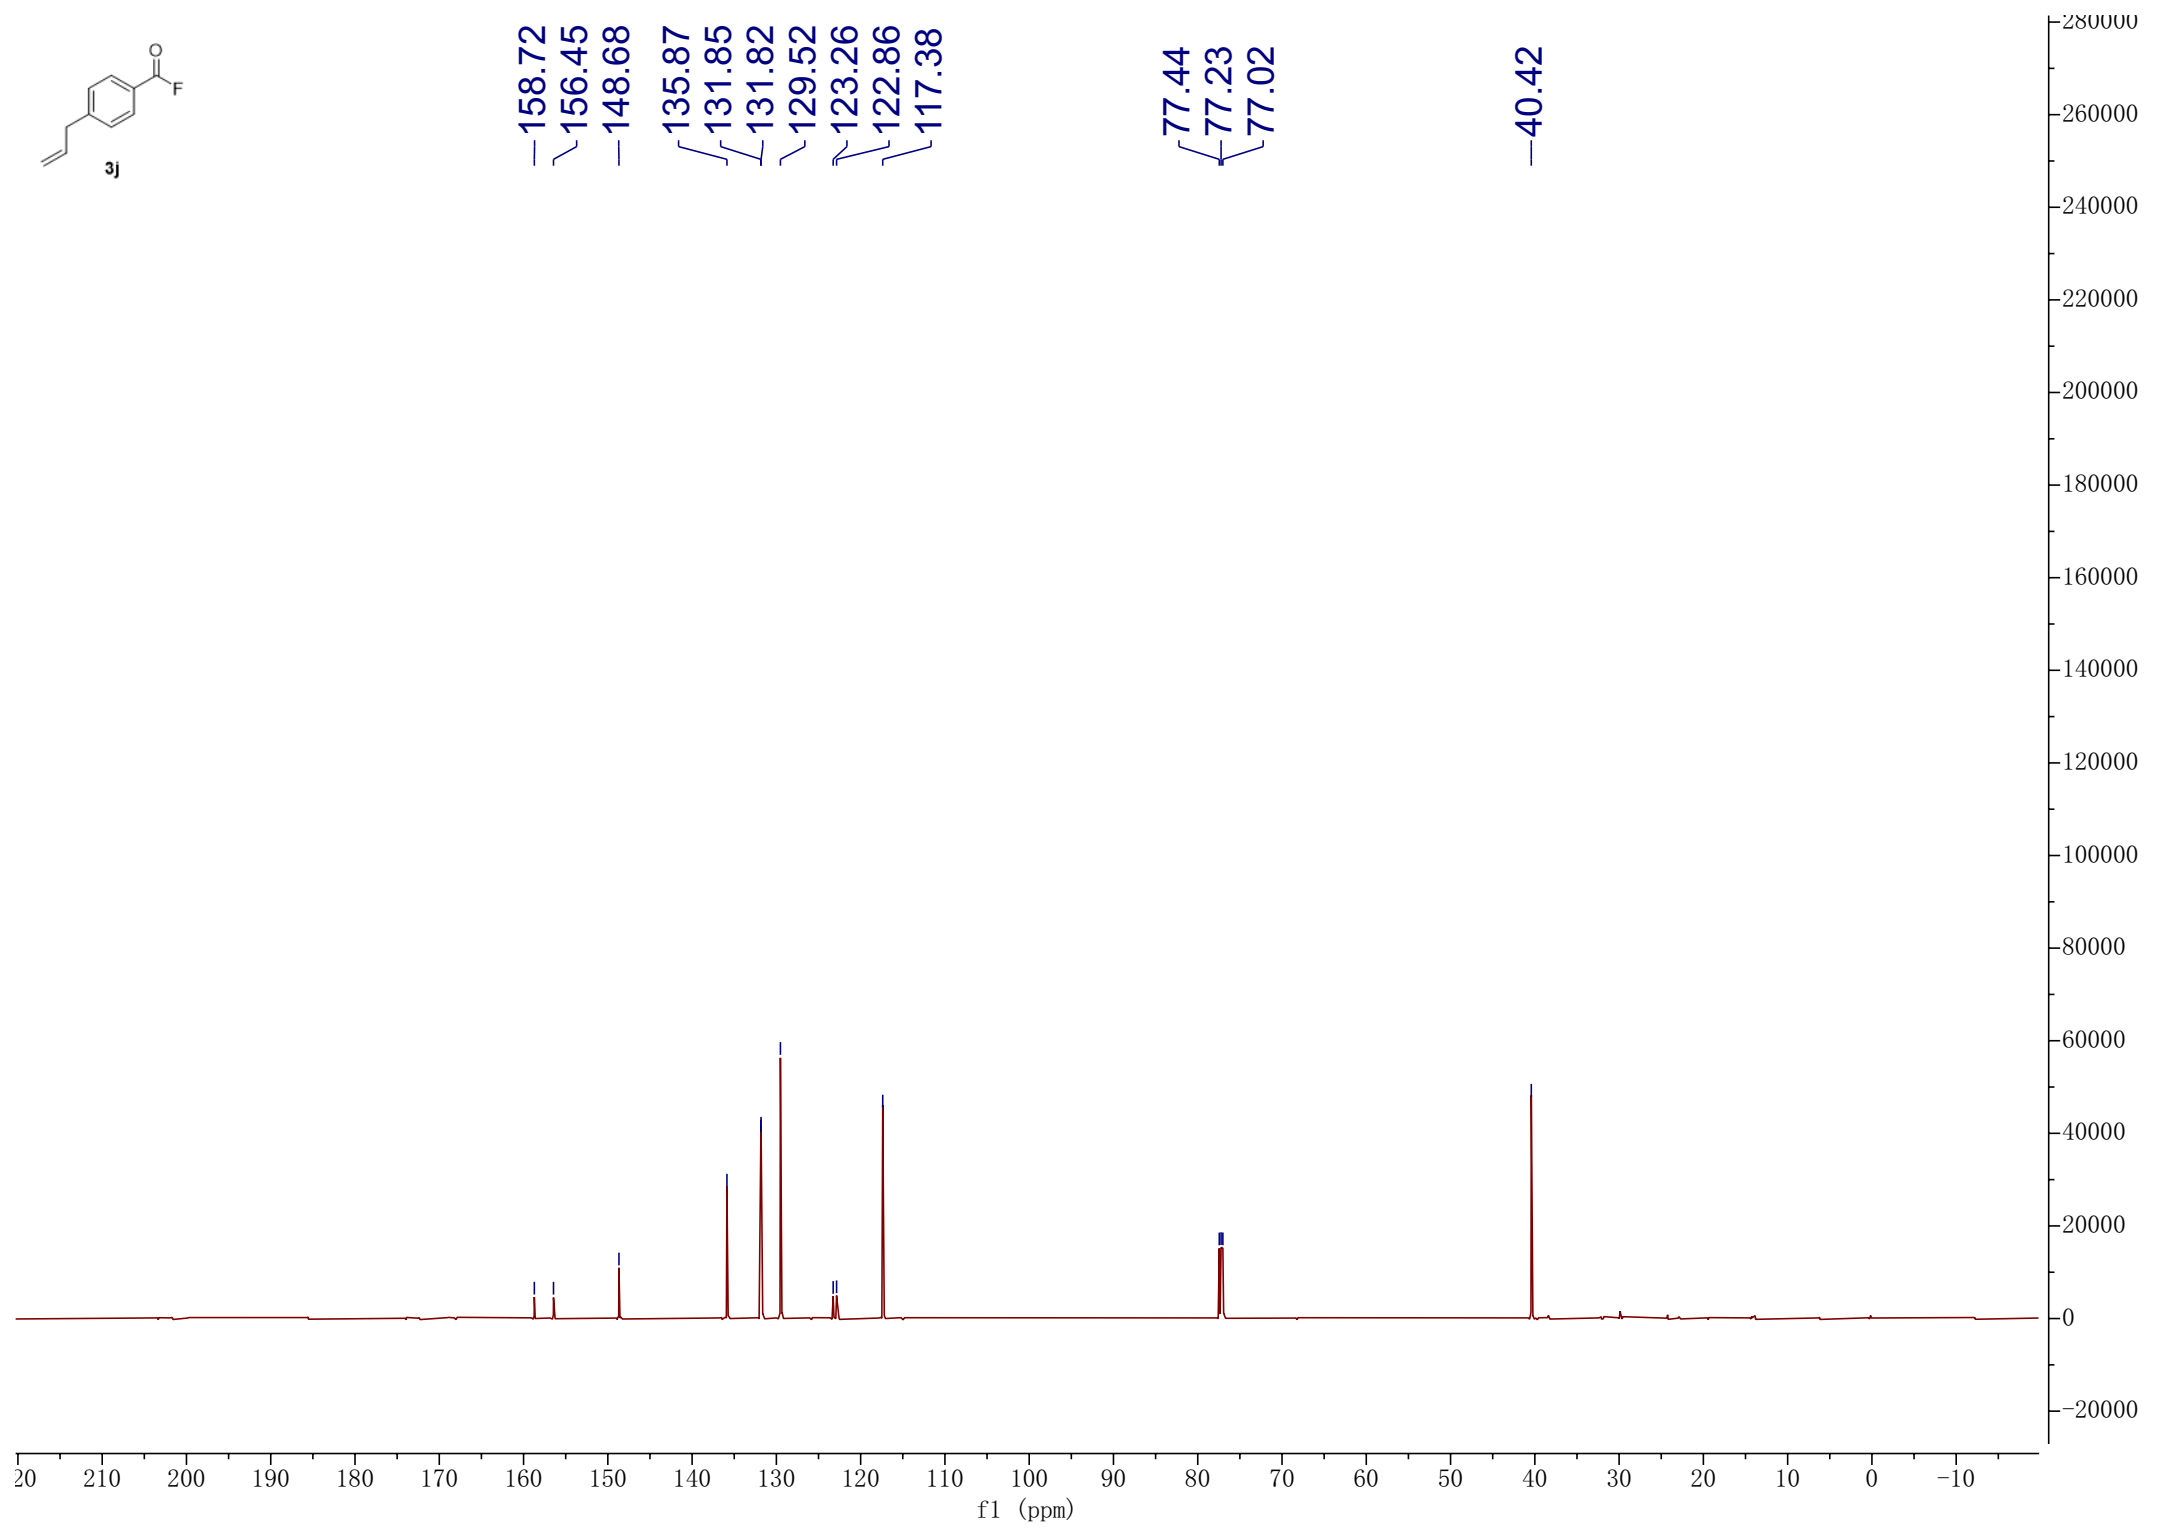

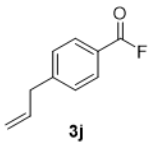

—17.721

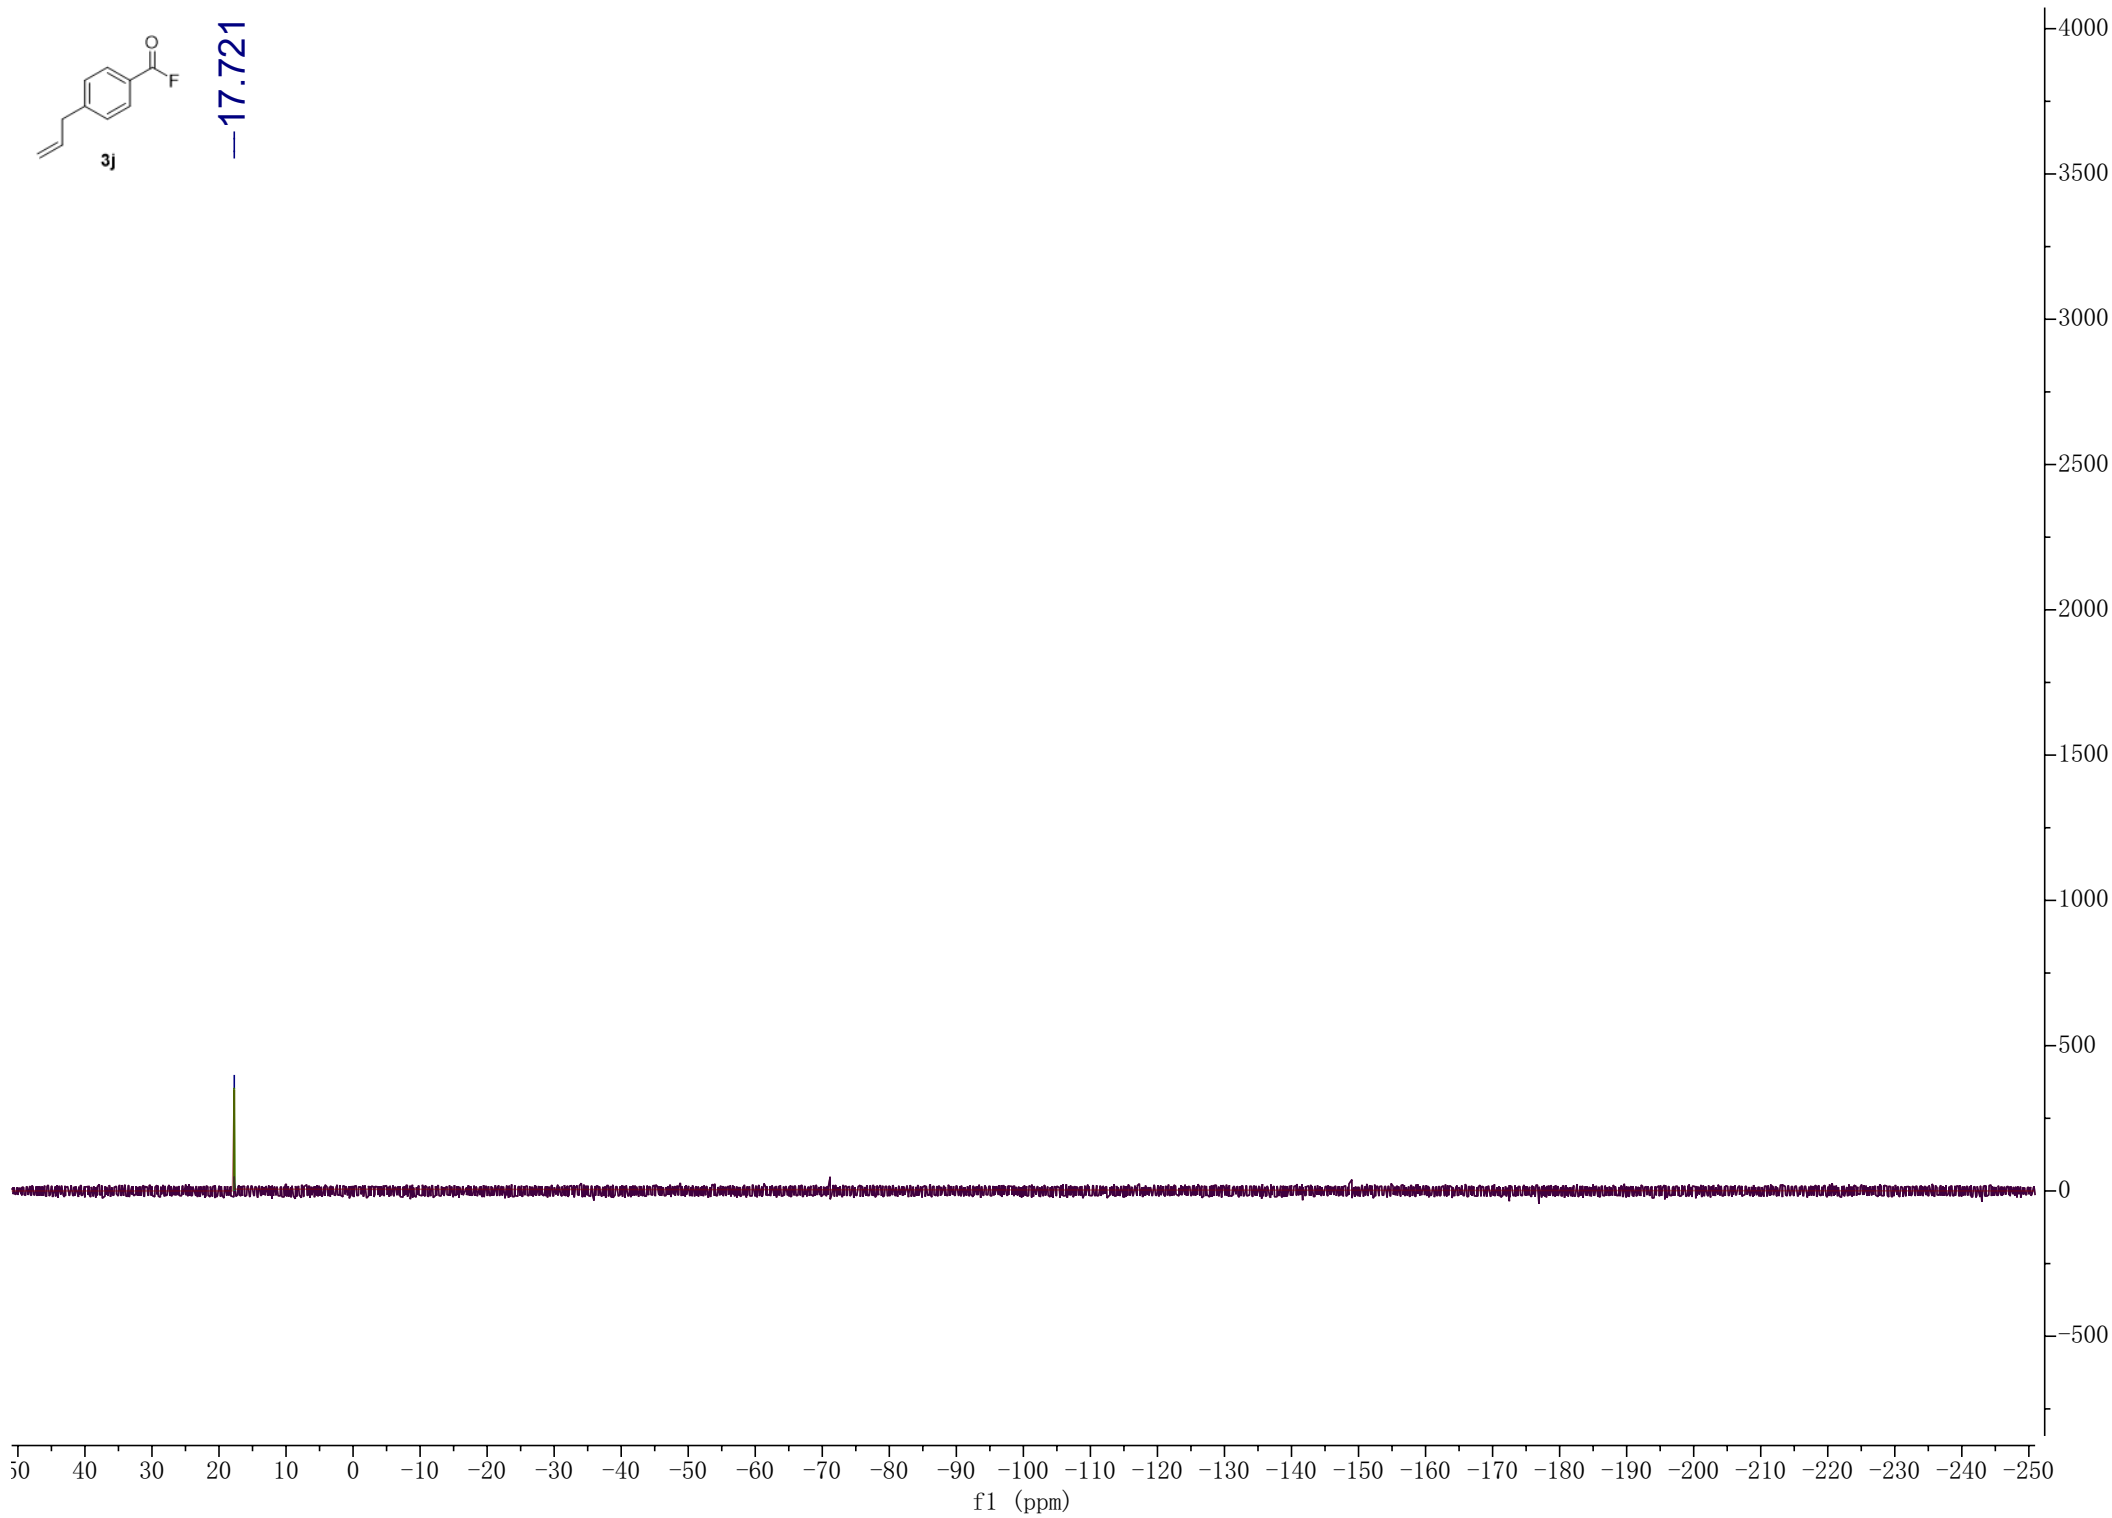



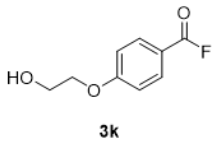

7.986  
7.971

7.260  
7.002  
6.988

4.176  
4.169  
4.161  
4.014  
4.006  
3.999

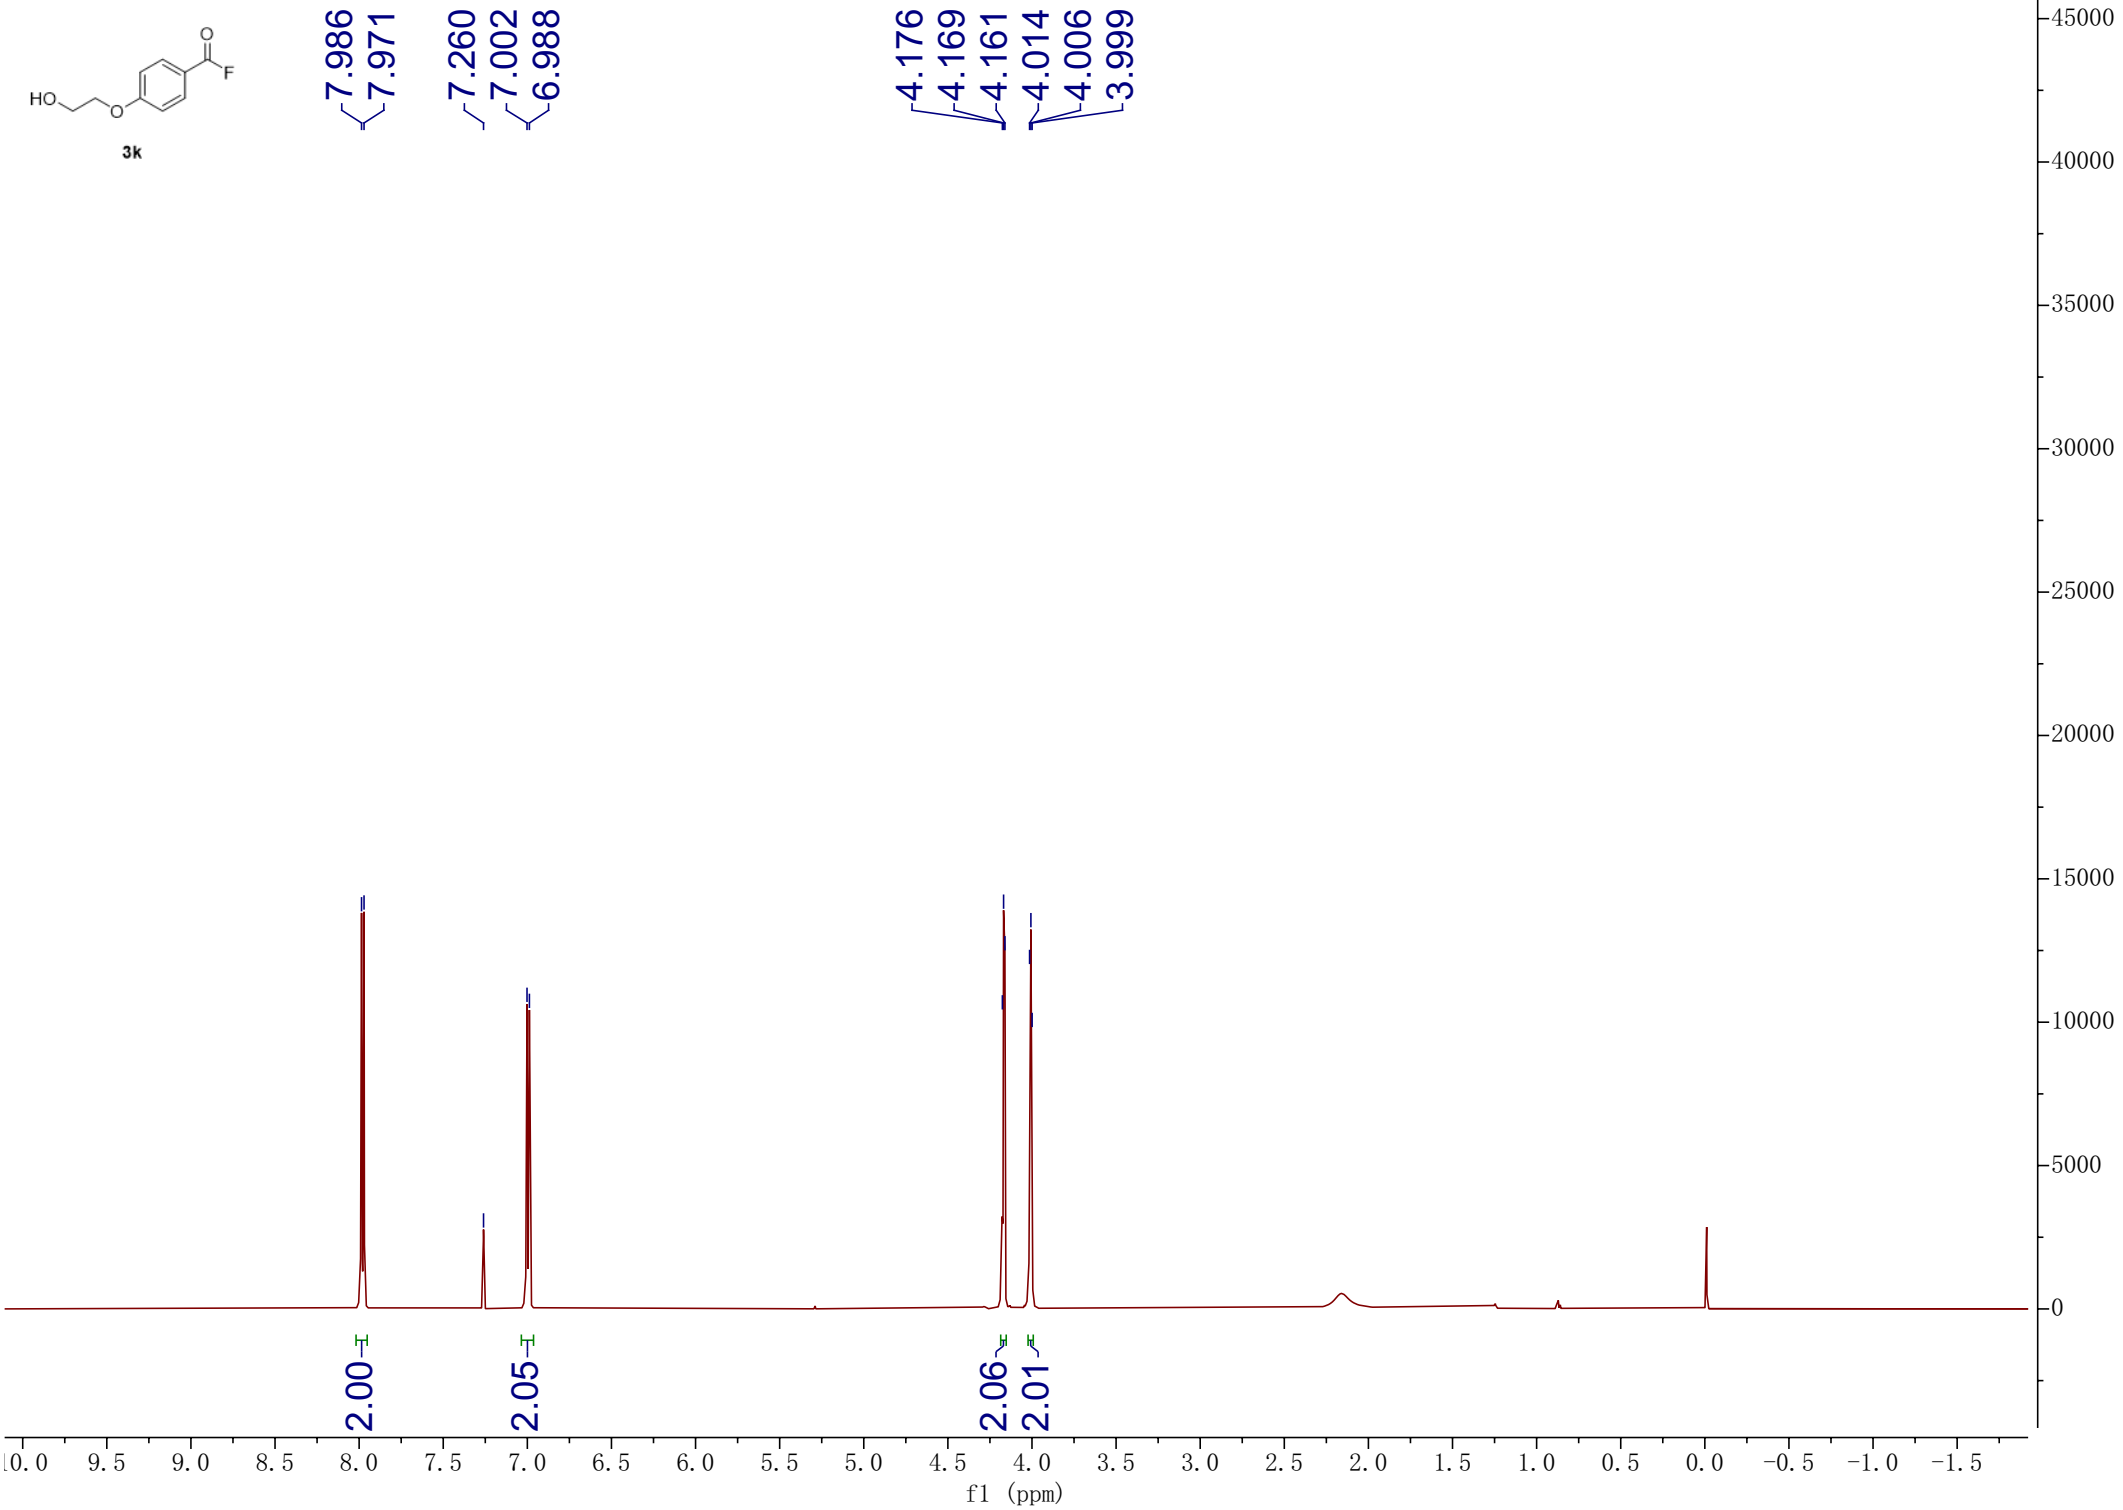



—16.199

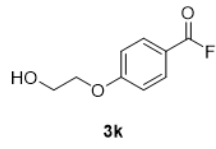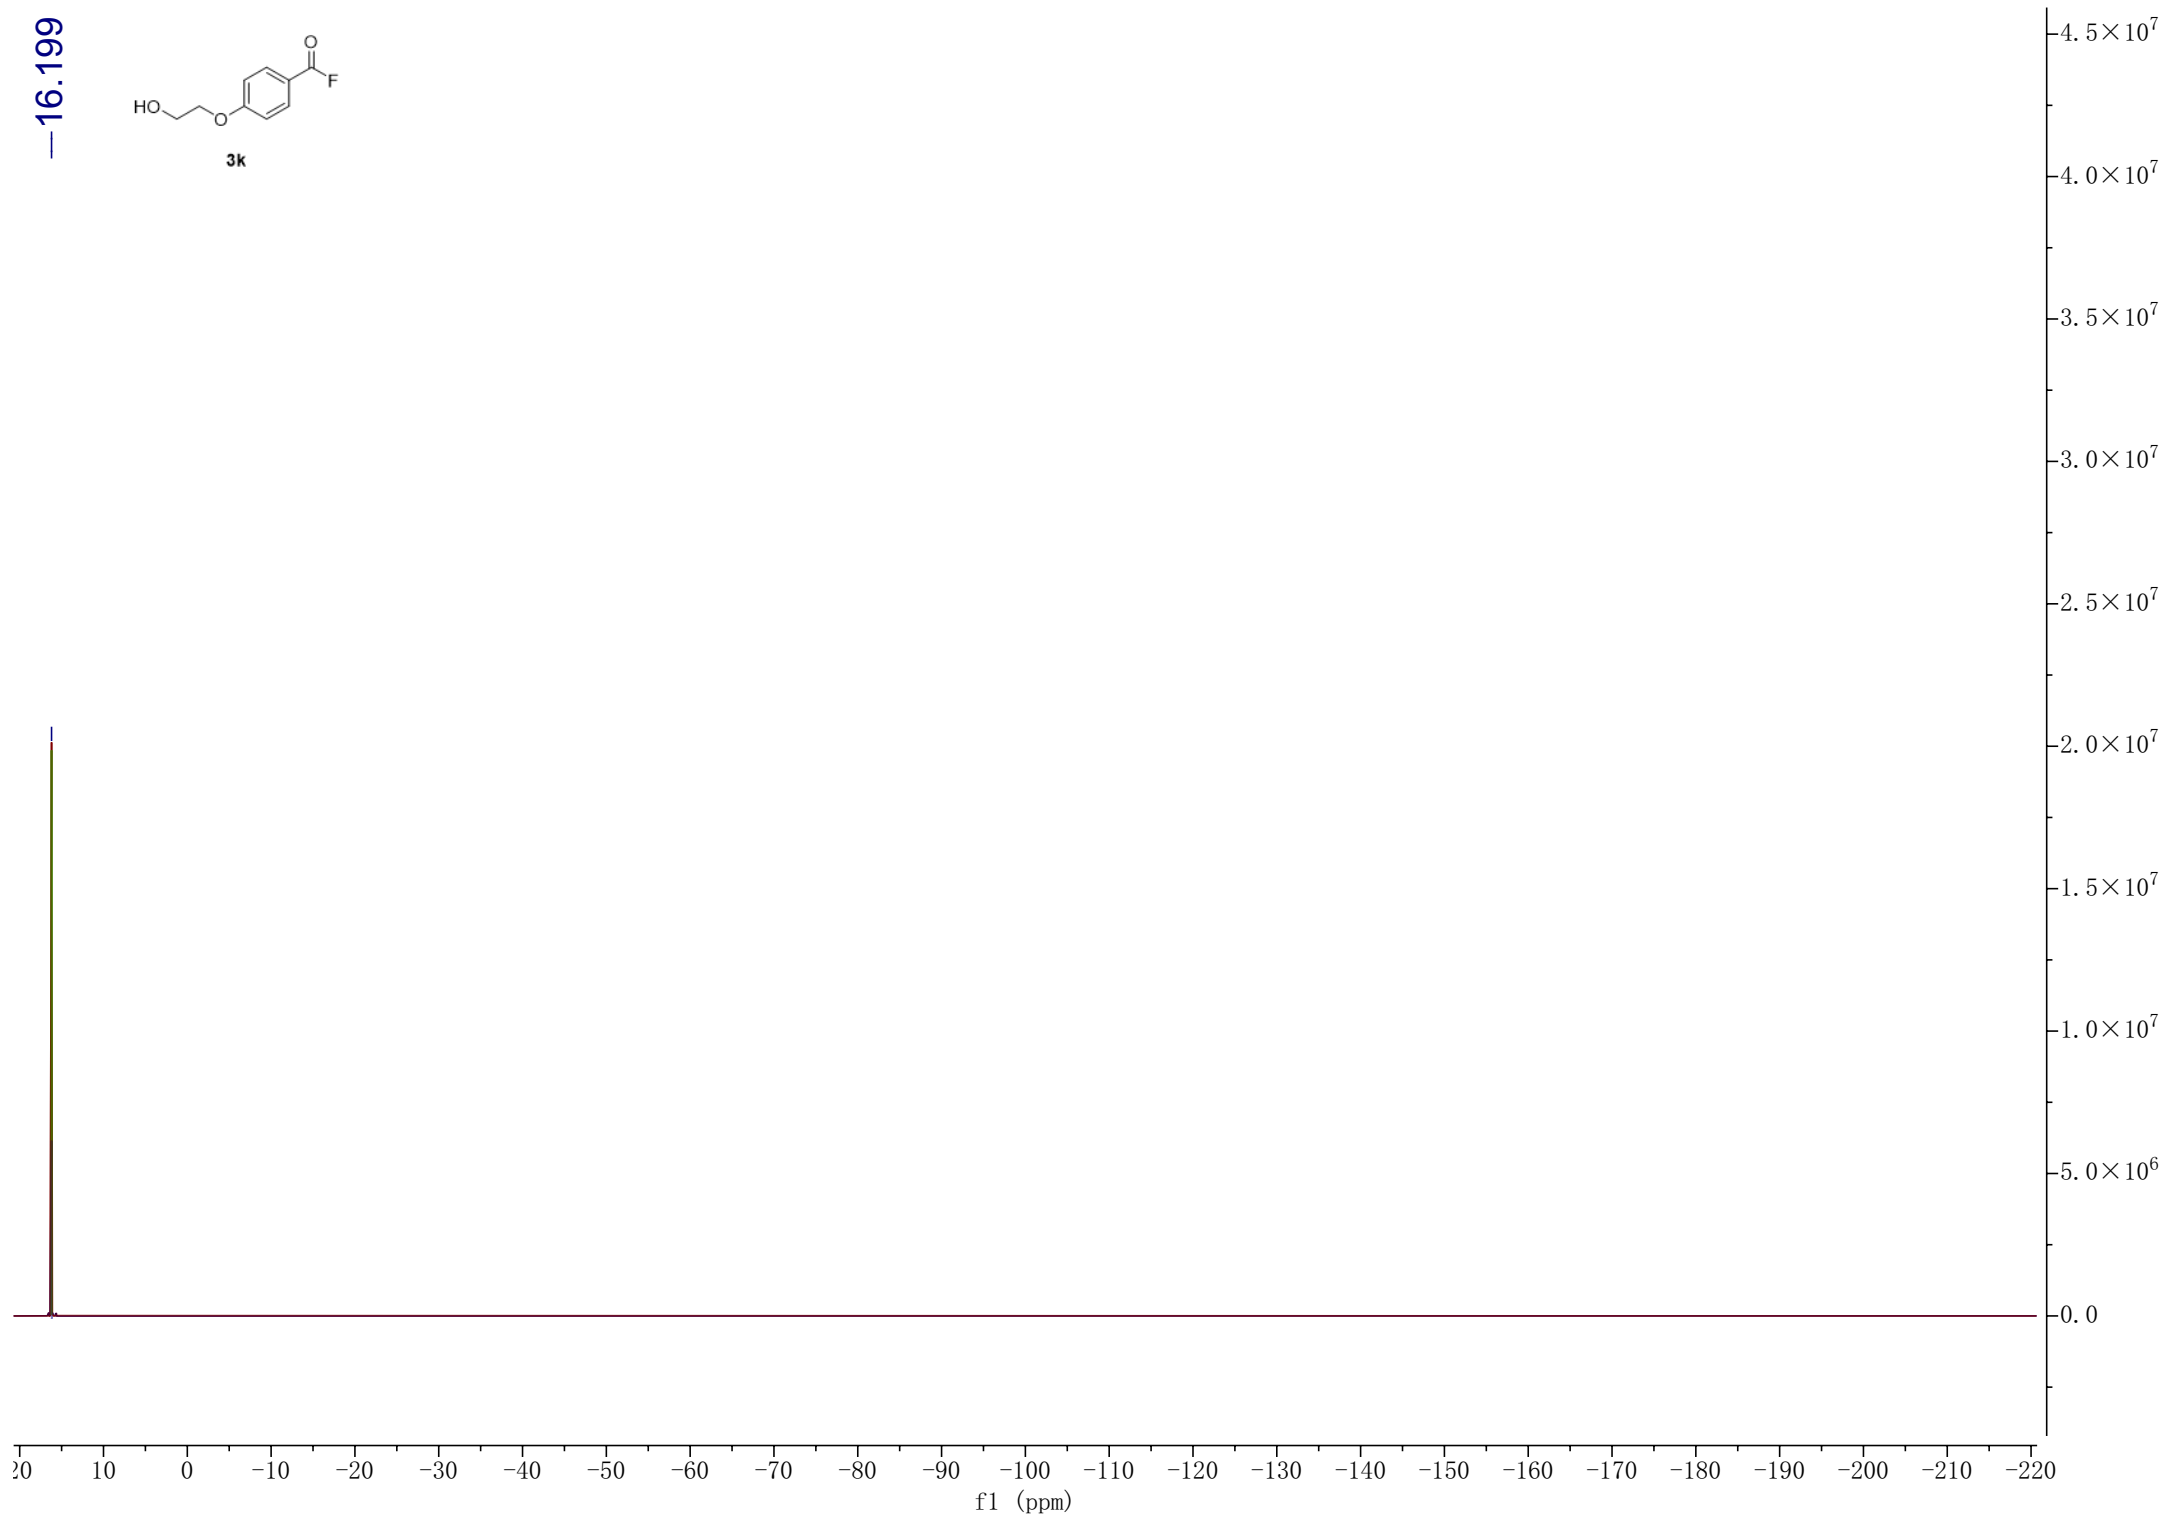

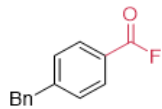

31

7.897  
7.883  
7.279  
7.268  
7.257  
7.204  
7.191  
7.179  
7.143  
7.132

4.002

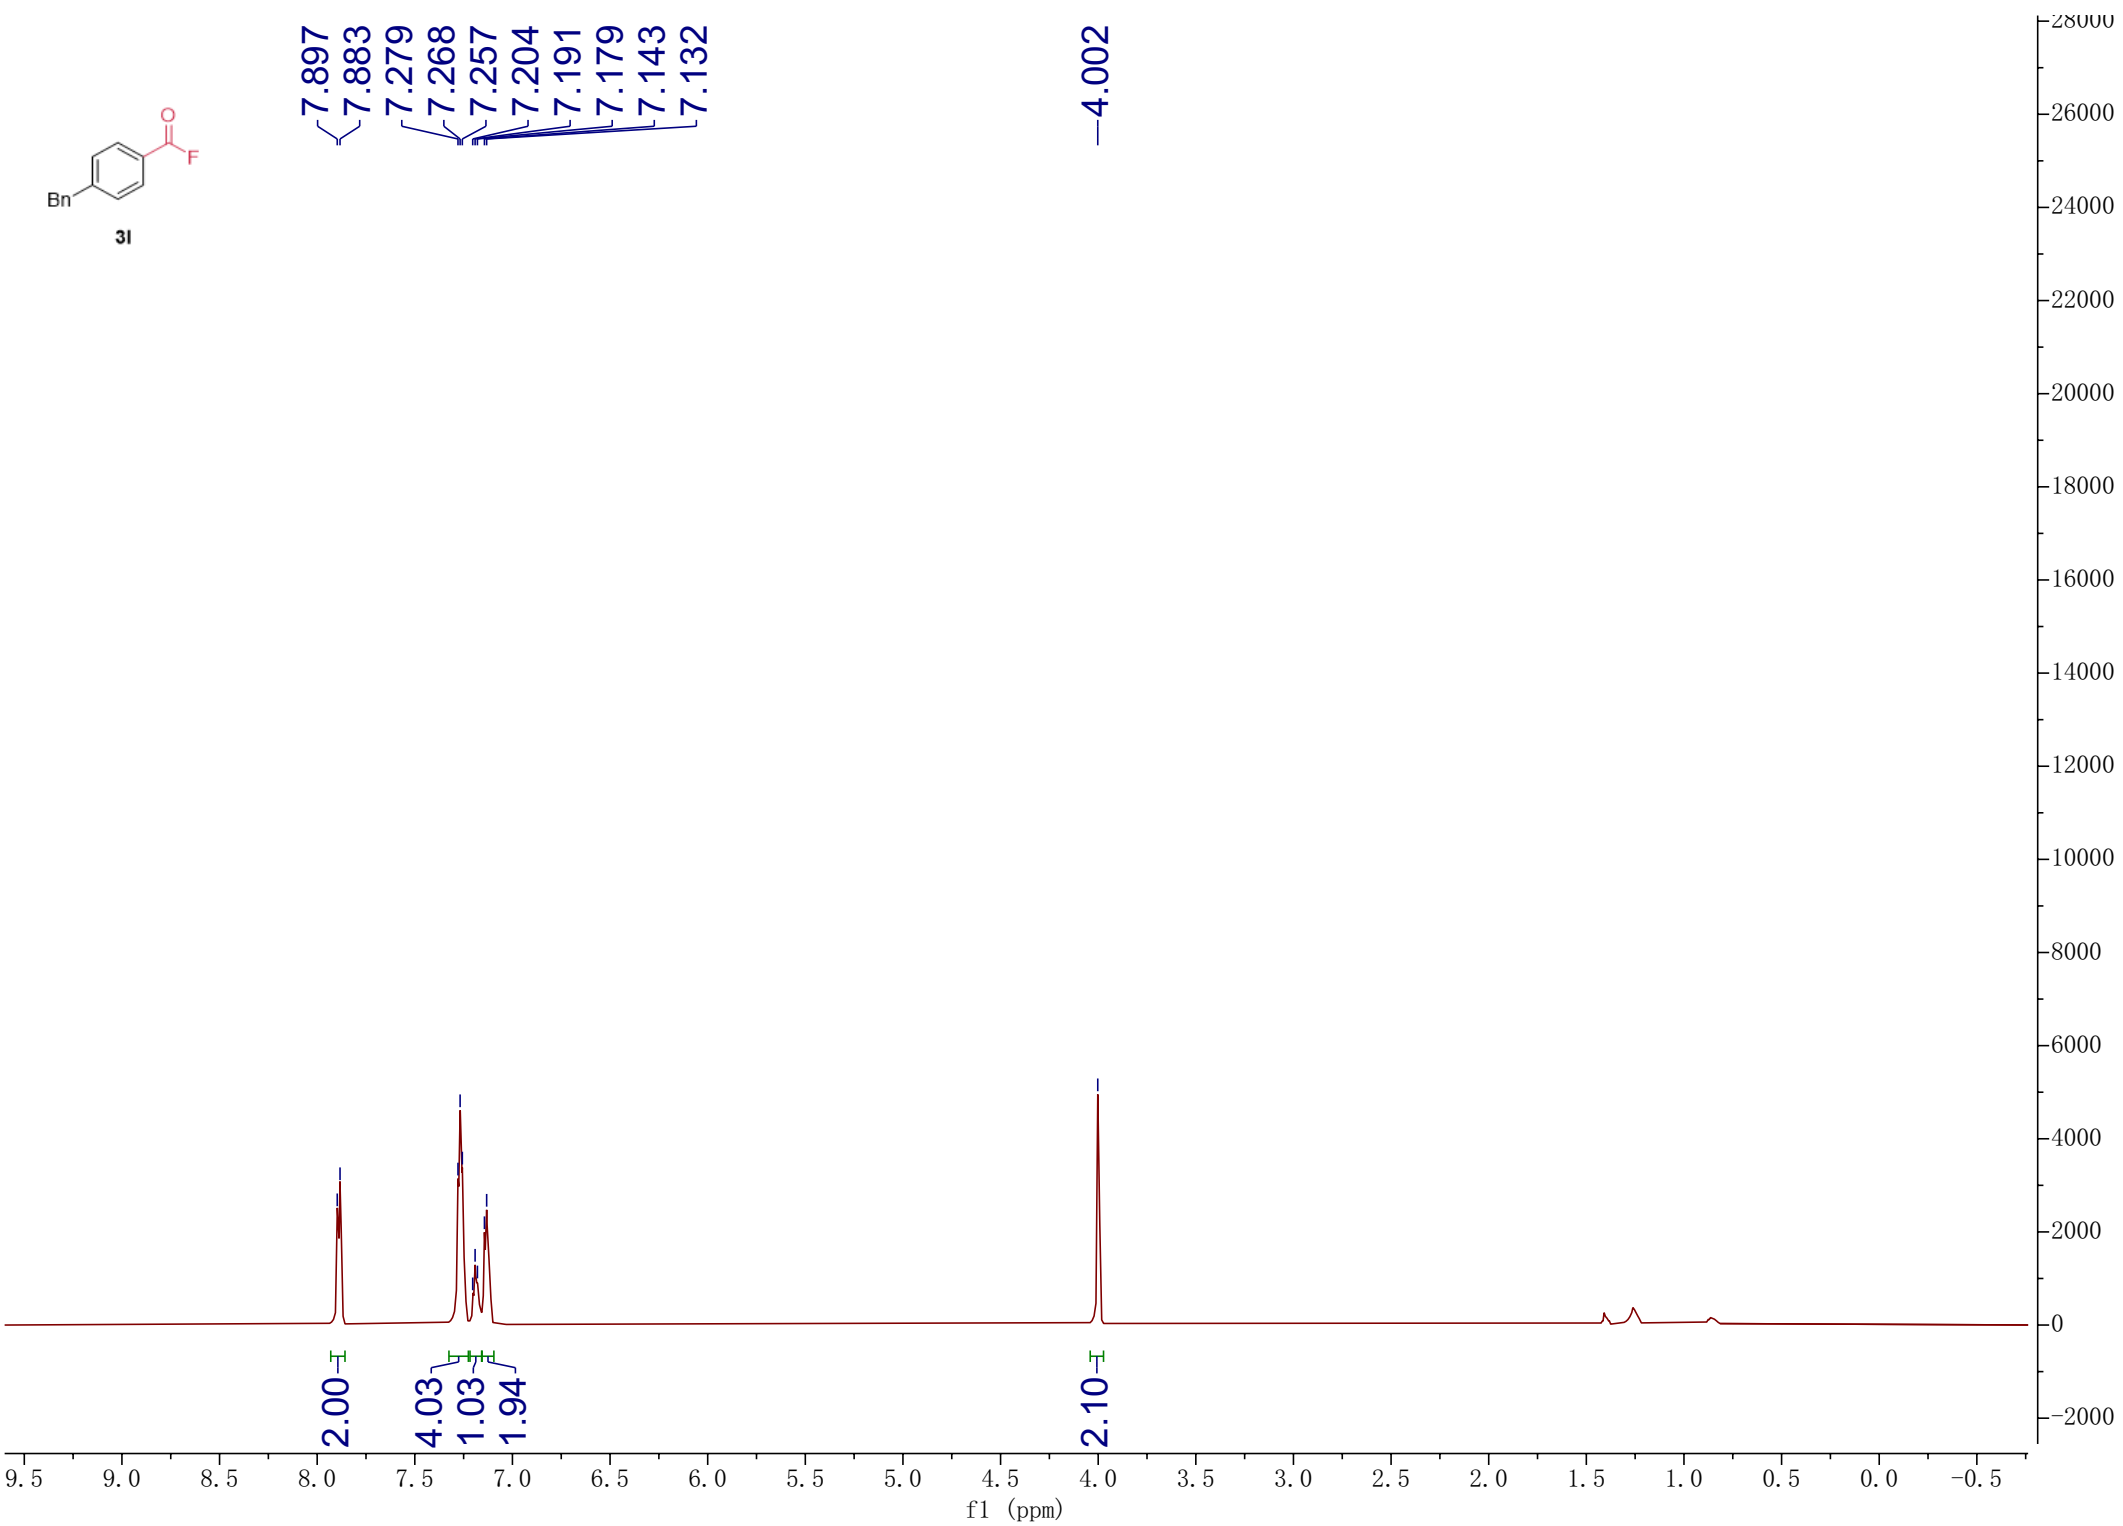

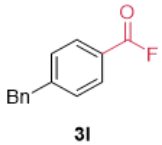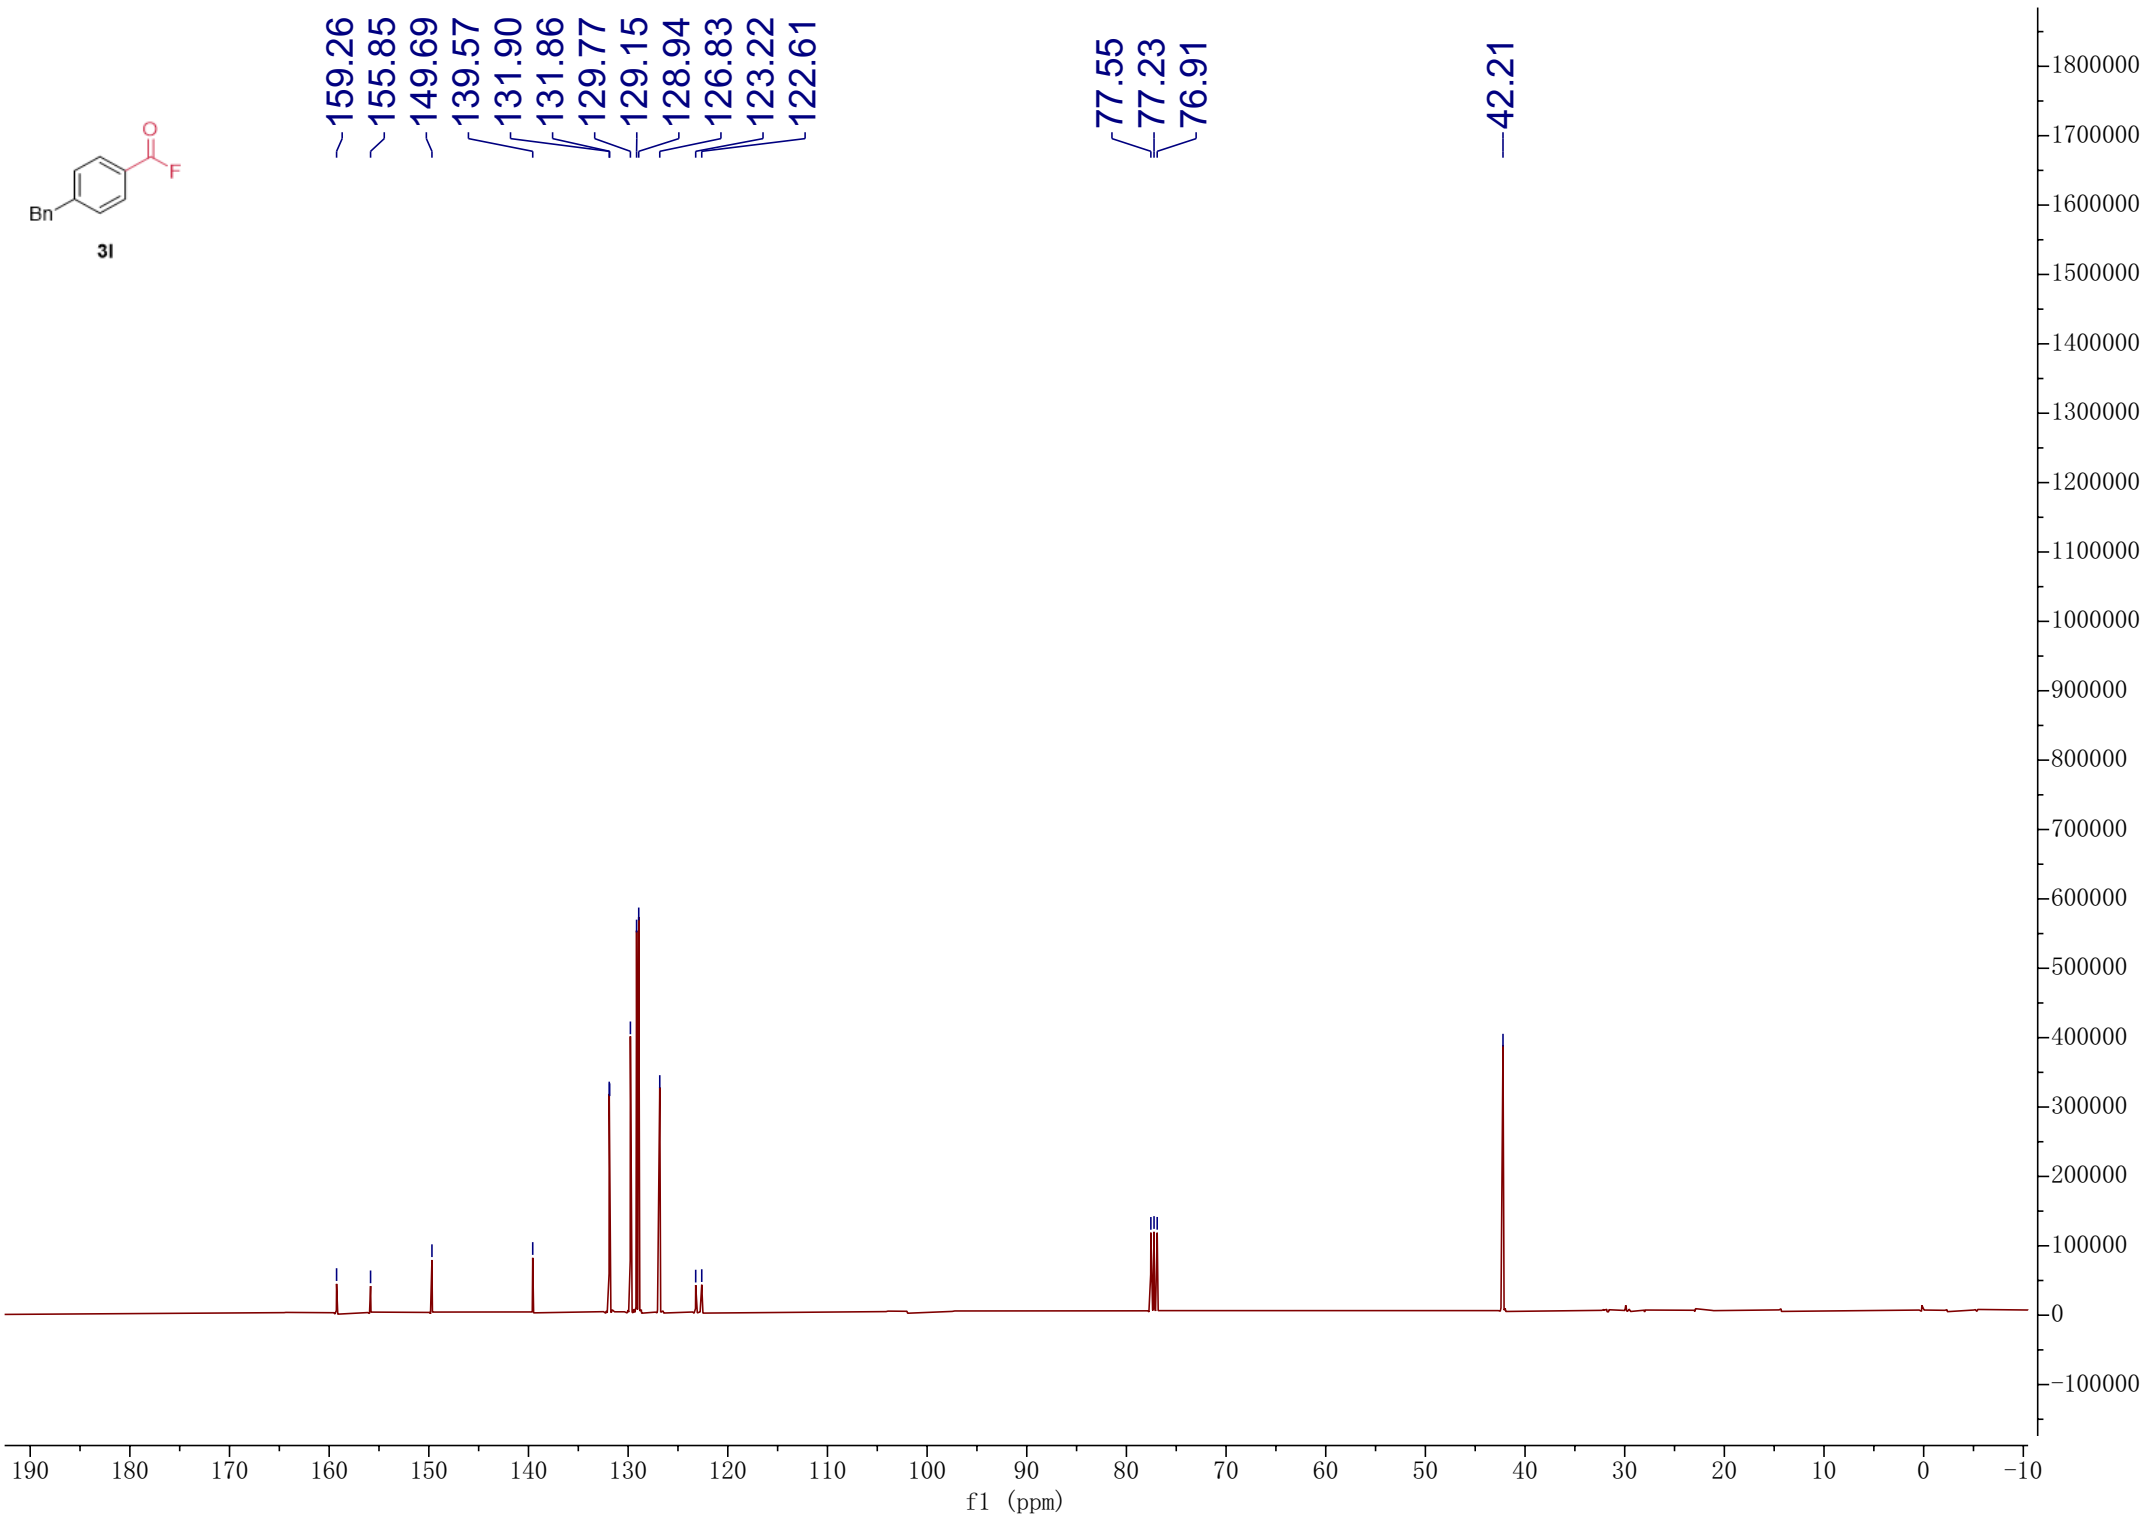

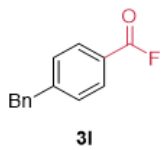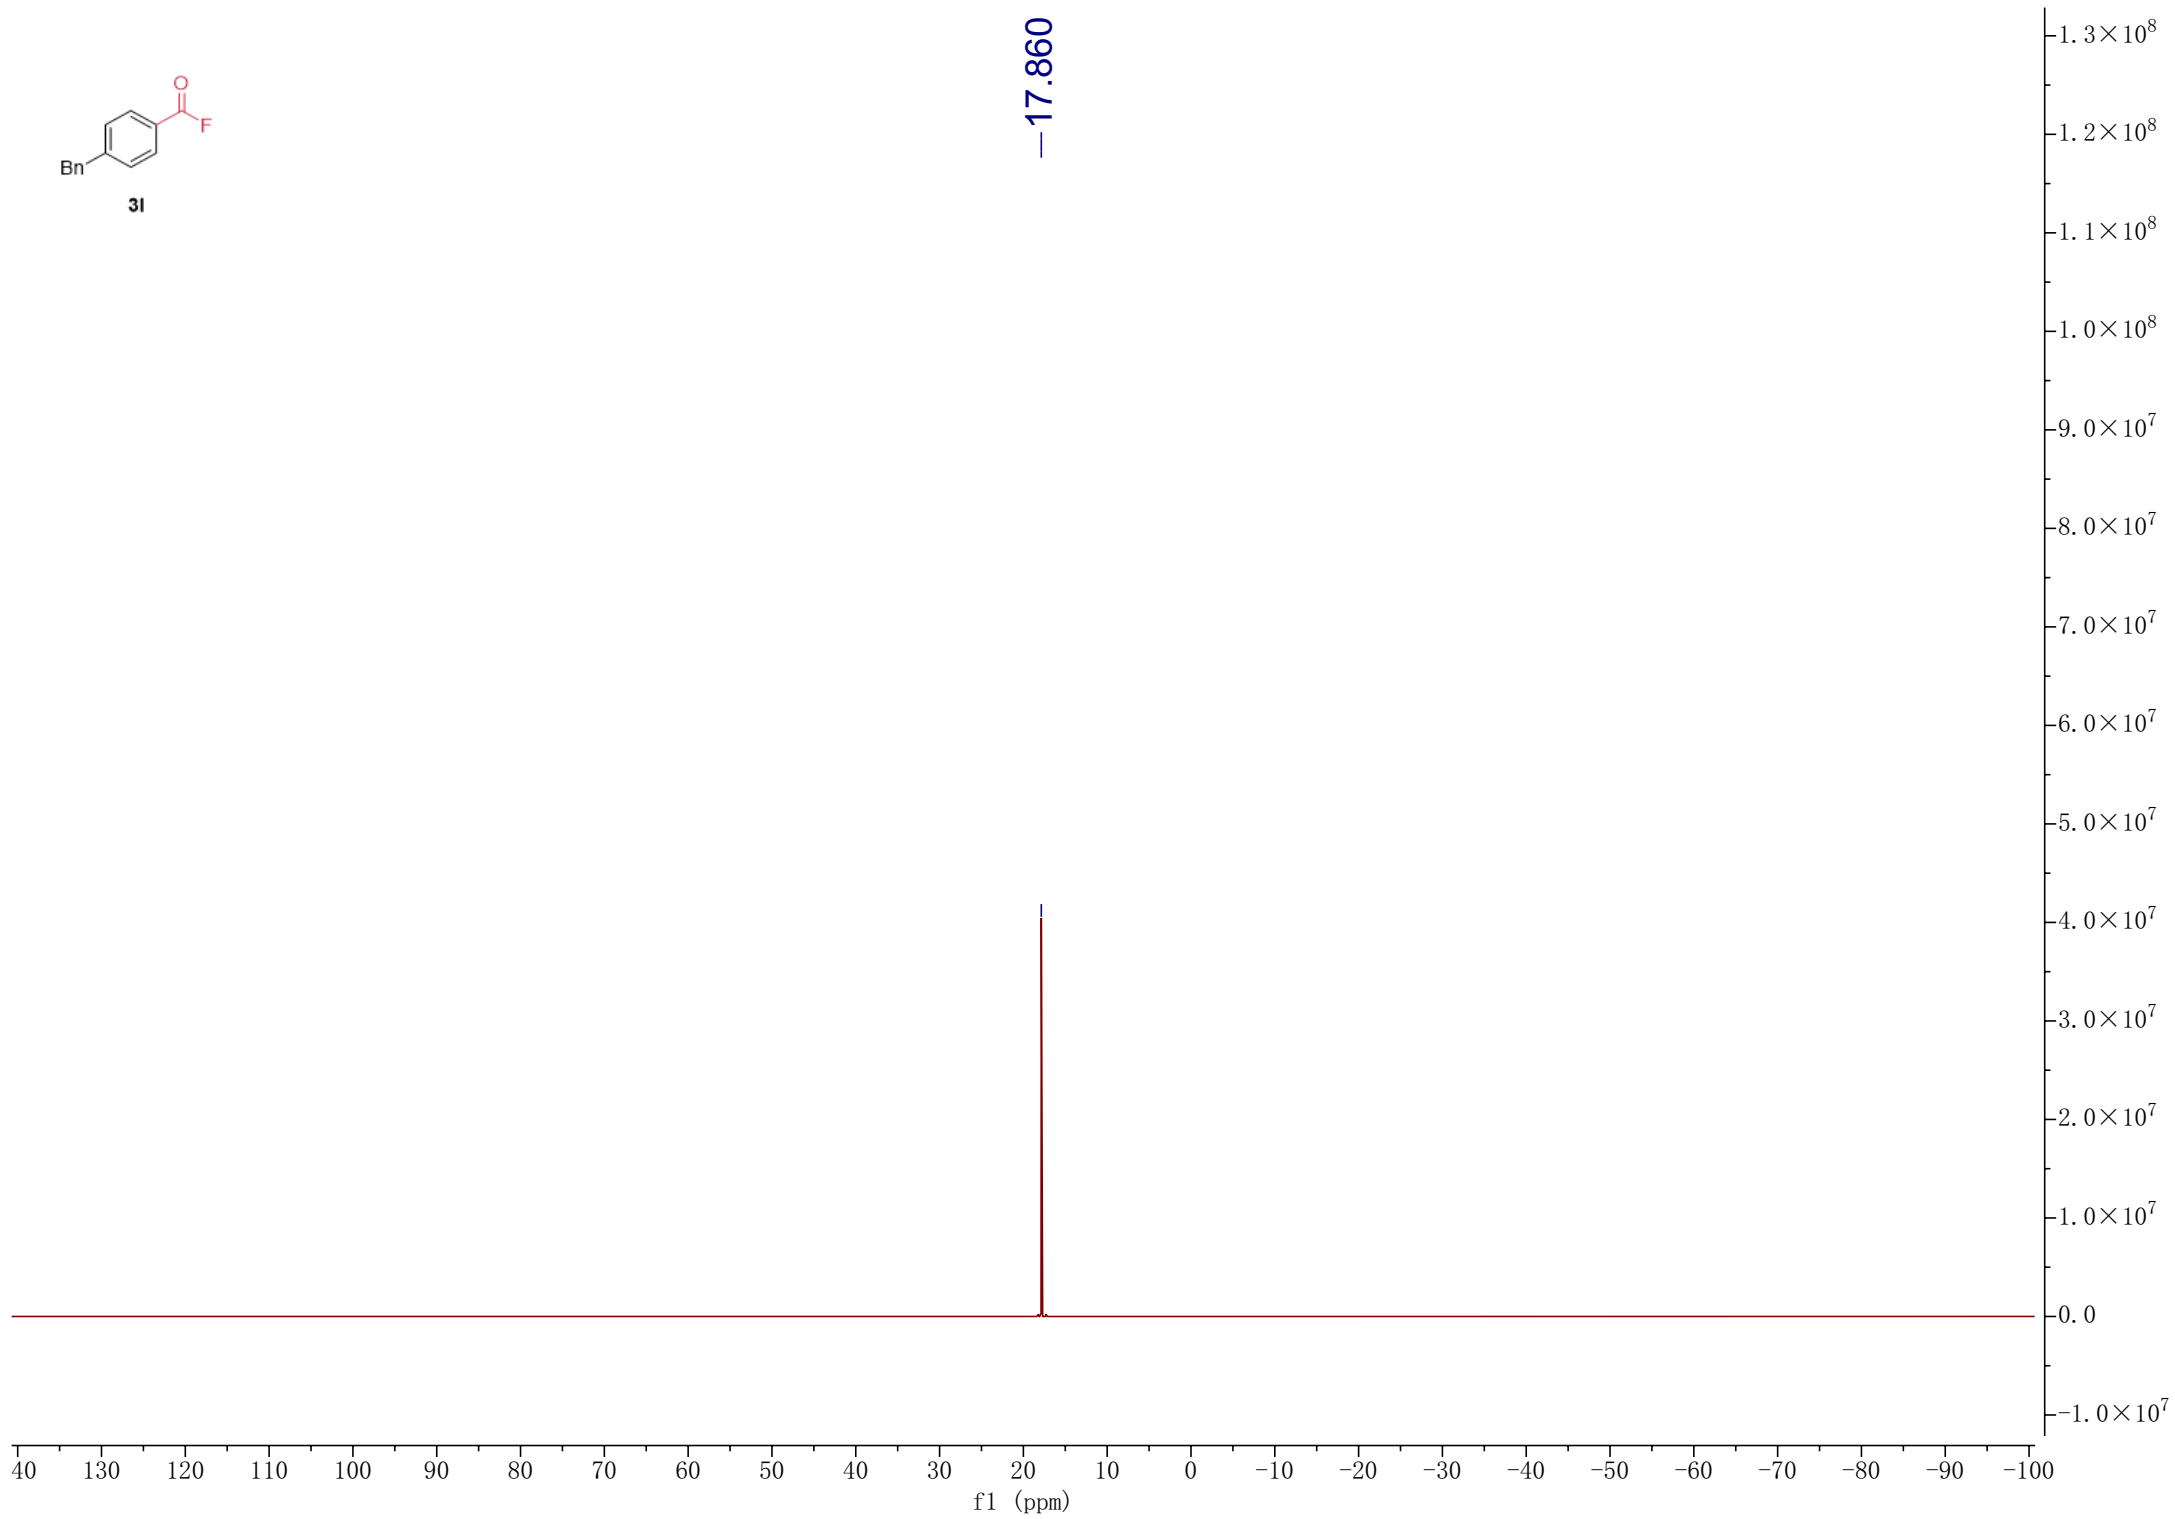

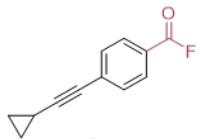

3m

7.938  
7.918  
7.476  
7.456  
7.260

1.513  
1.501  
1.492  
1.480  
1.468  
1.460  
1.447  
0.955  
0.937  
0.927  
0.916  
0.907  
0.870  
0.860  
0.849  
0.843

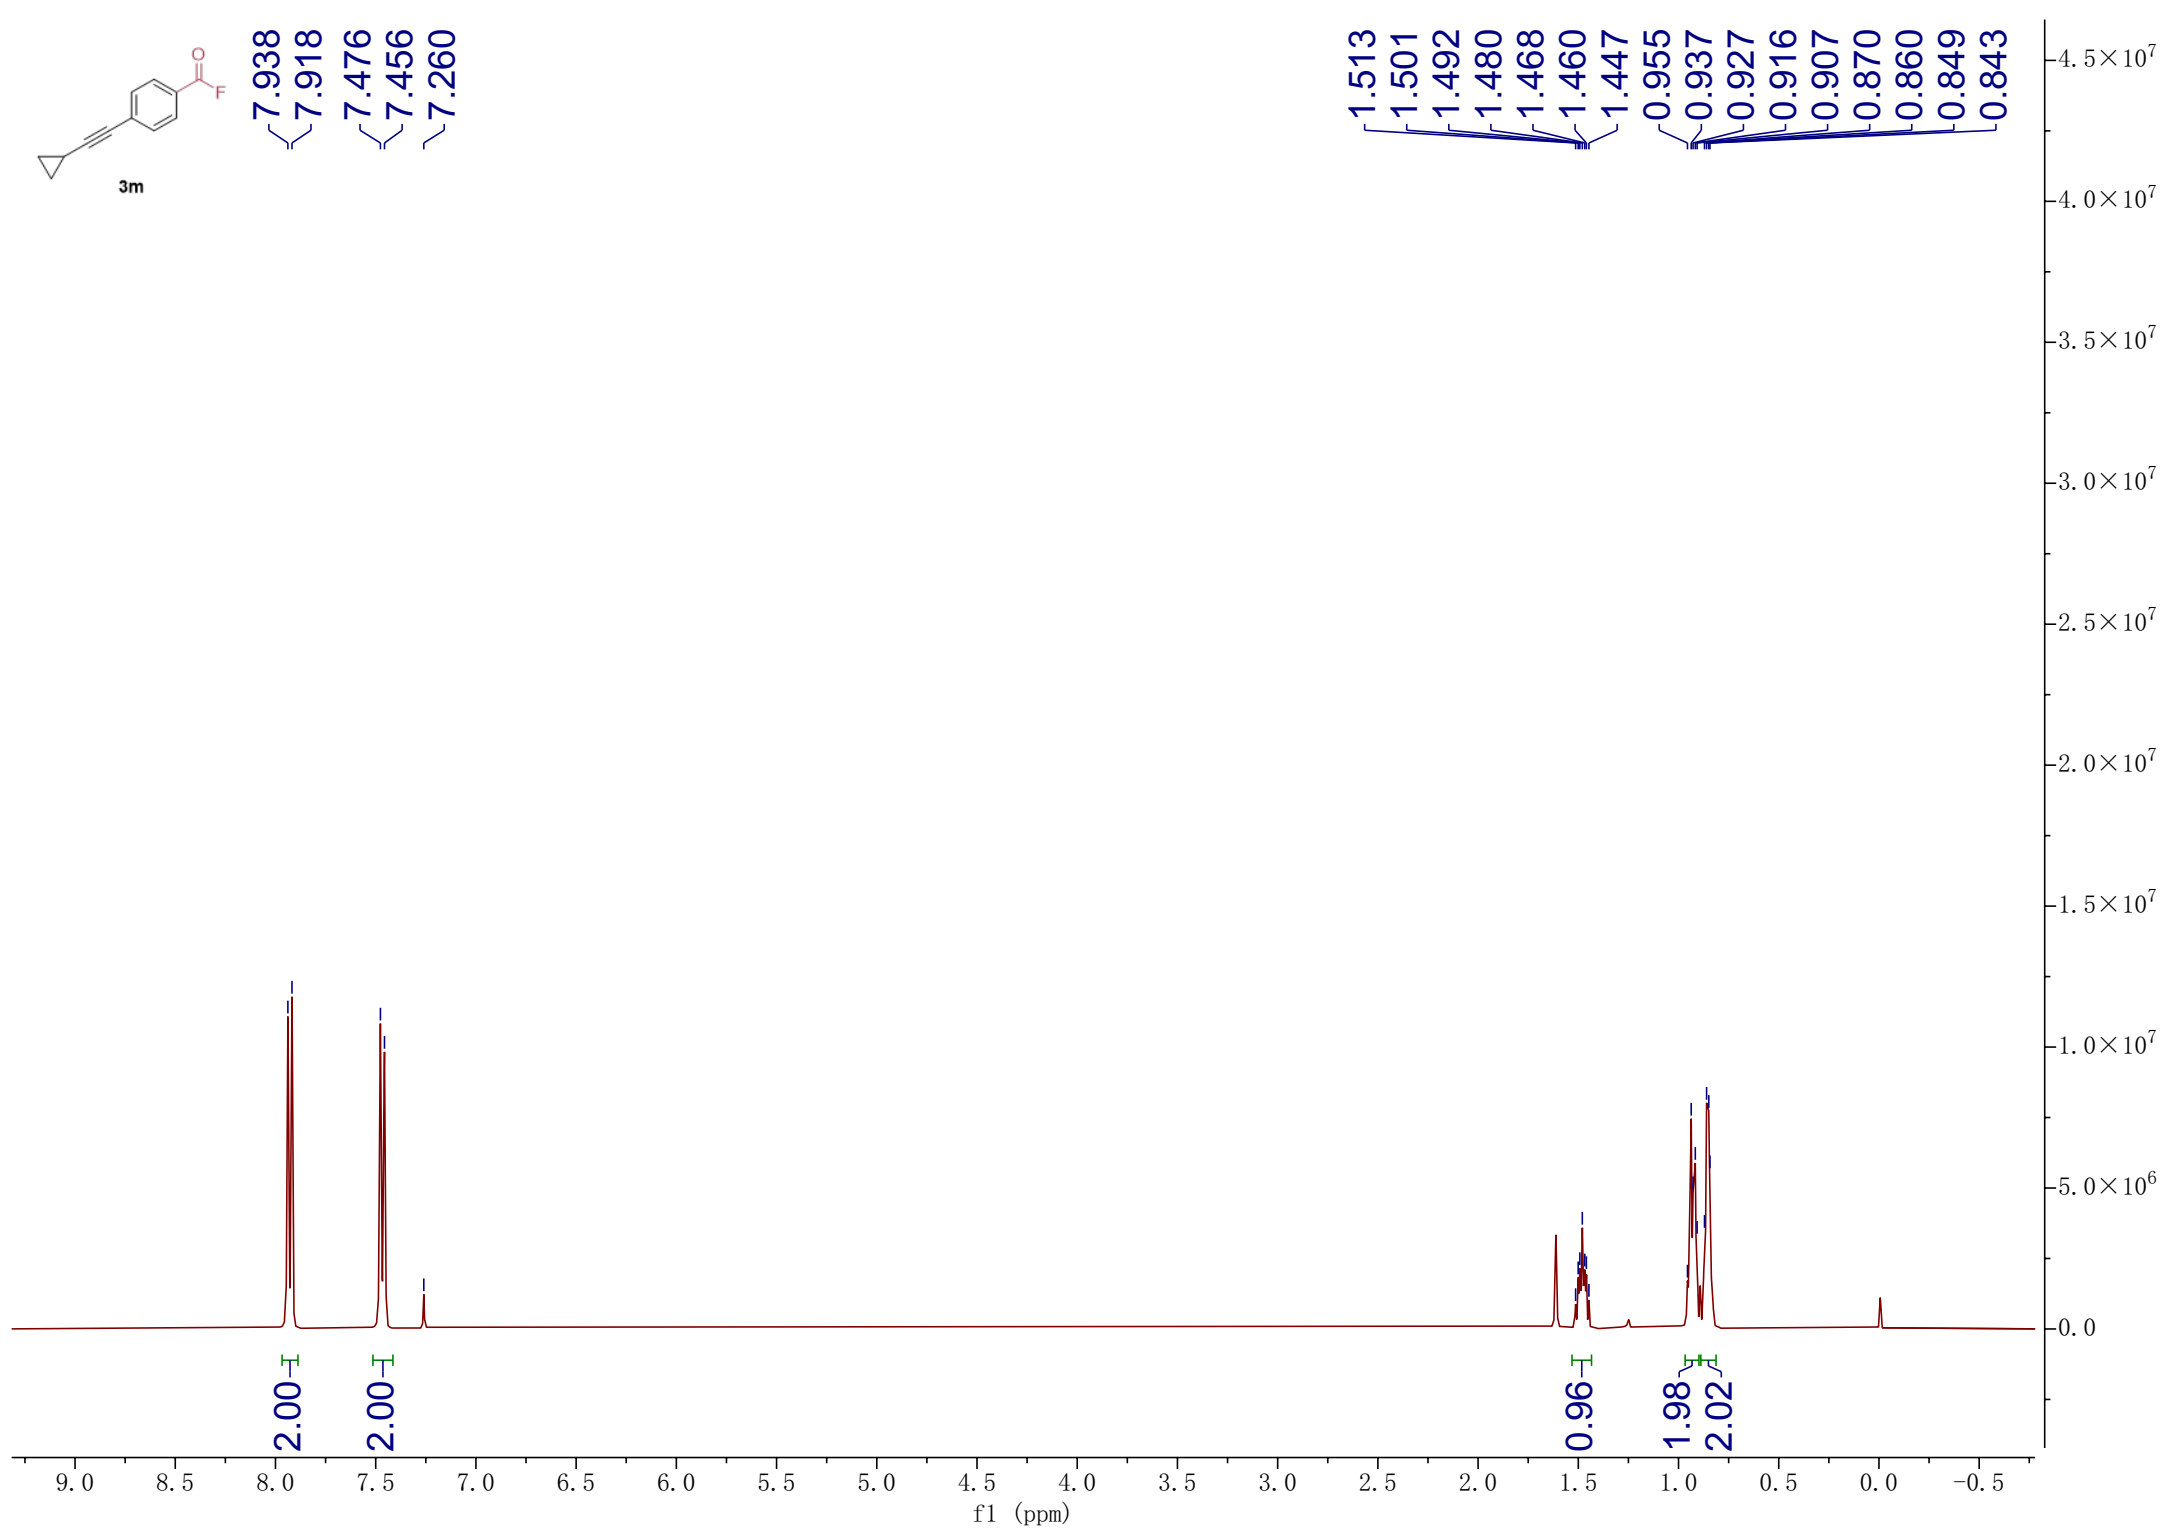

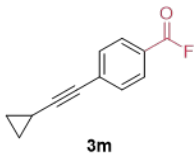

158.919  
155.508

132.159  
131.759  
131.394  
131.355  
123.675  
123.062

99.607

77.547  
77.230  
76.912

9.156

0.517

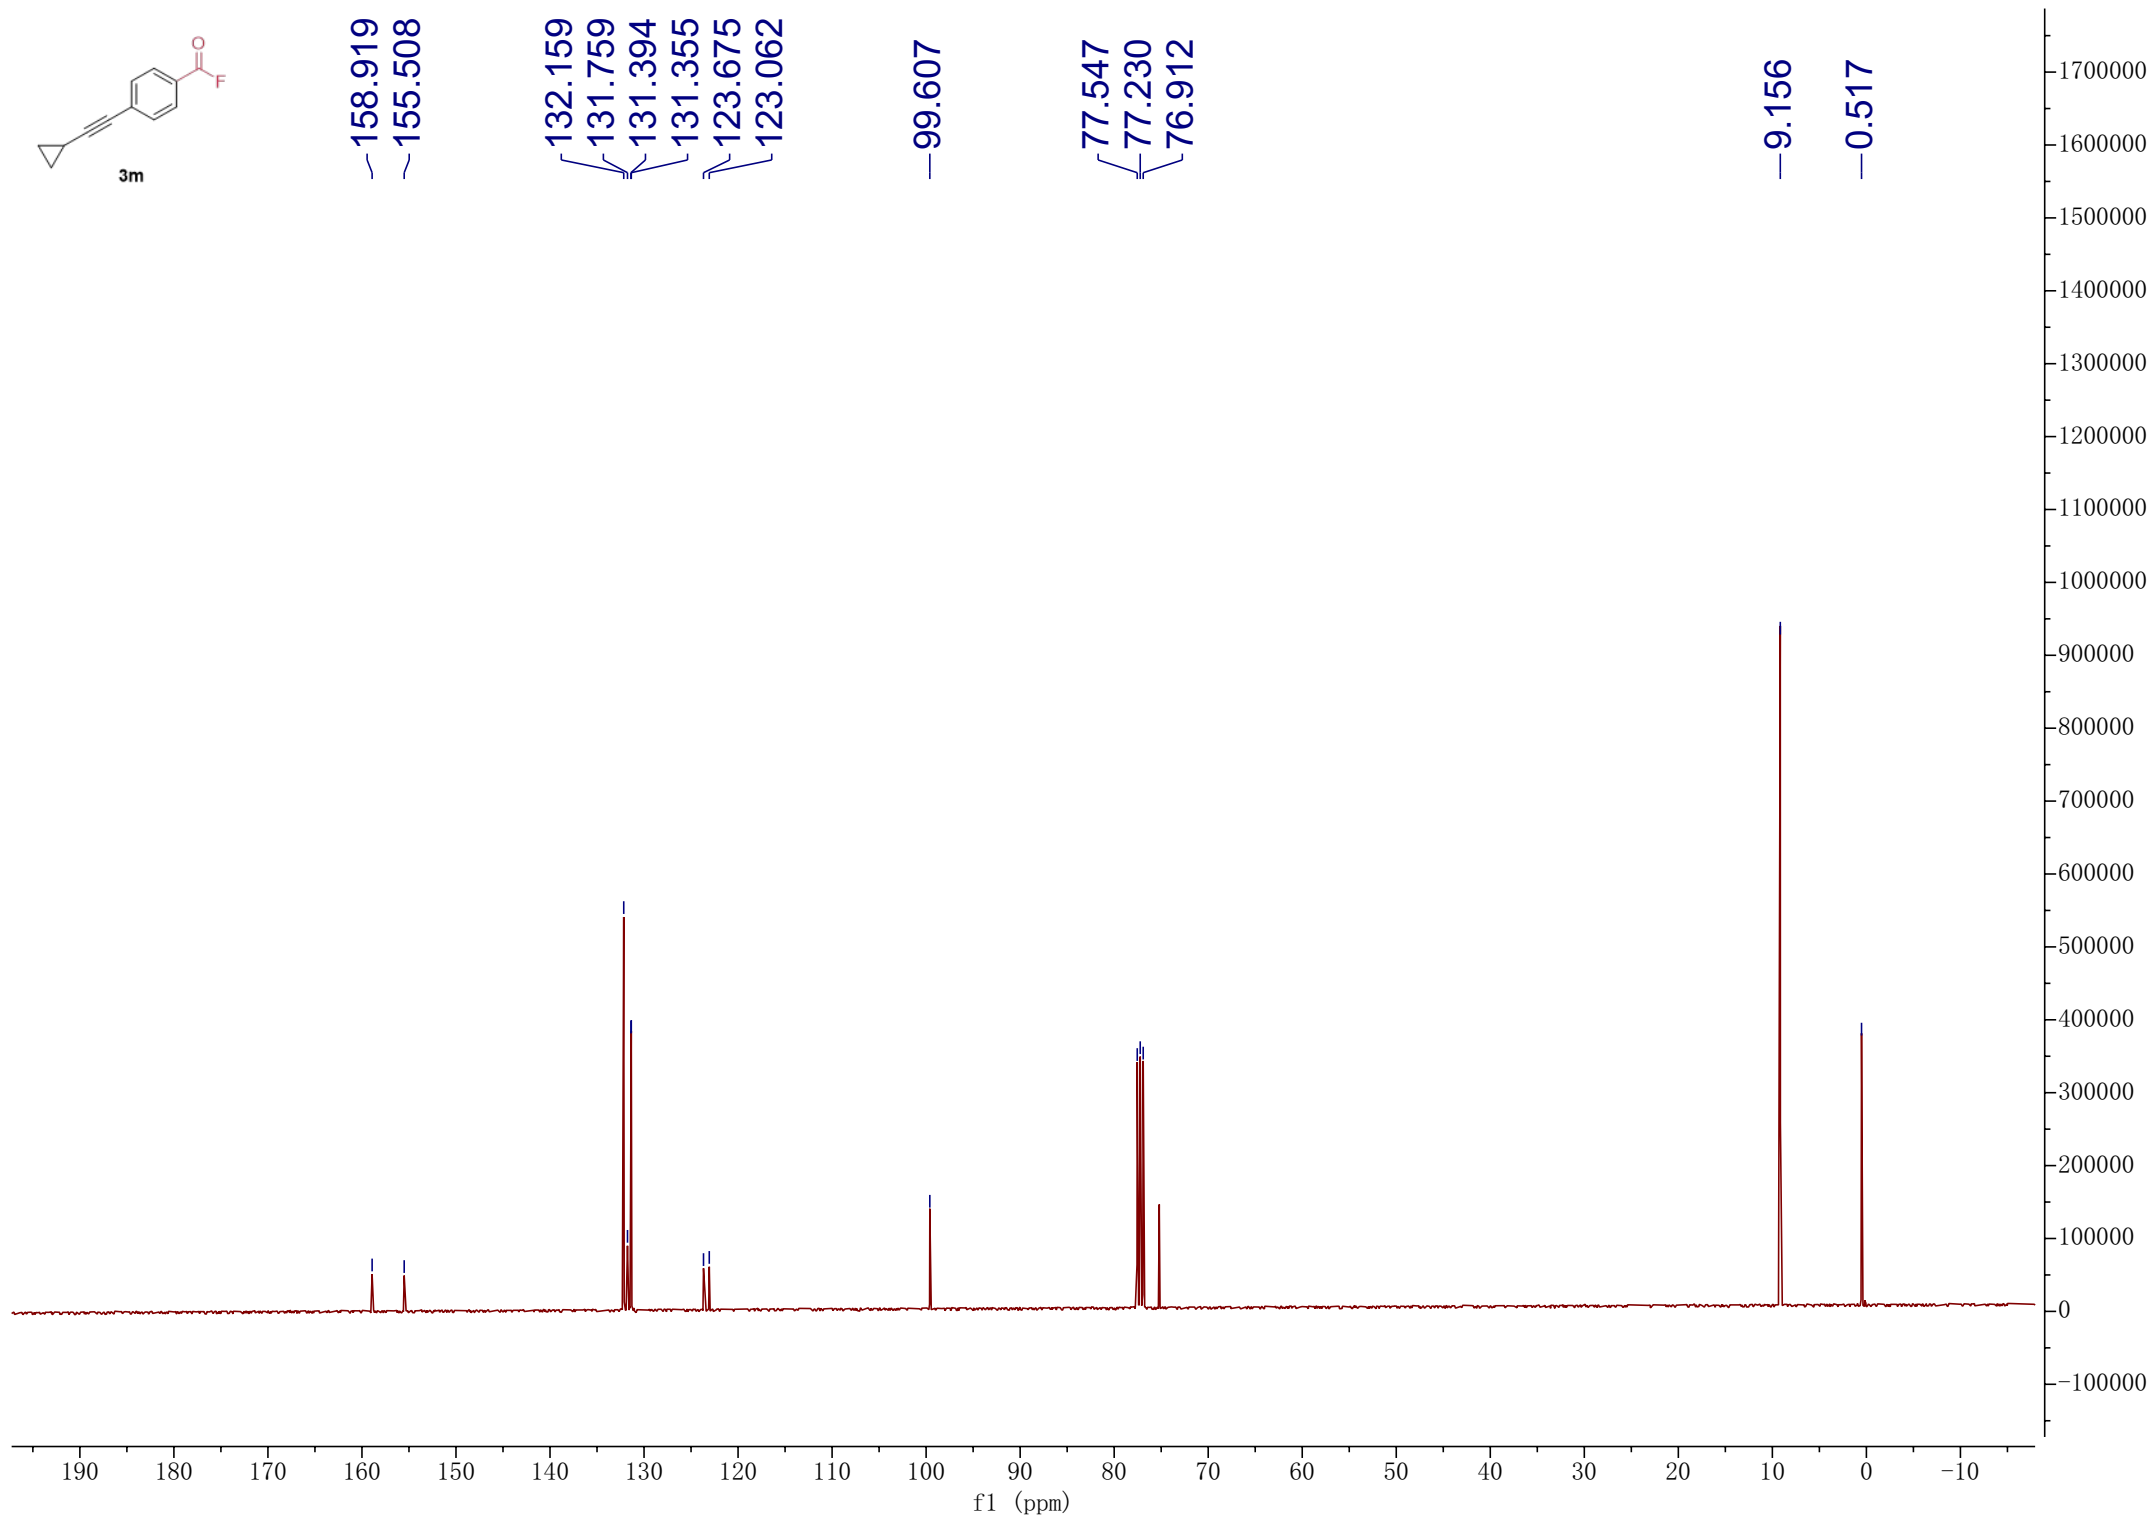



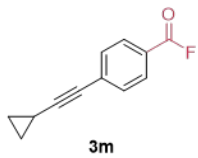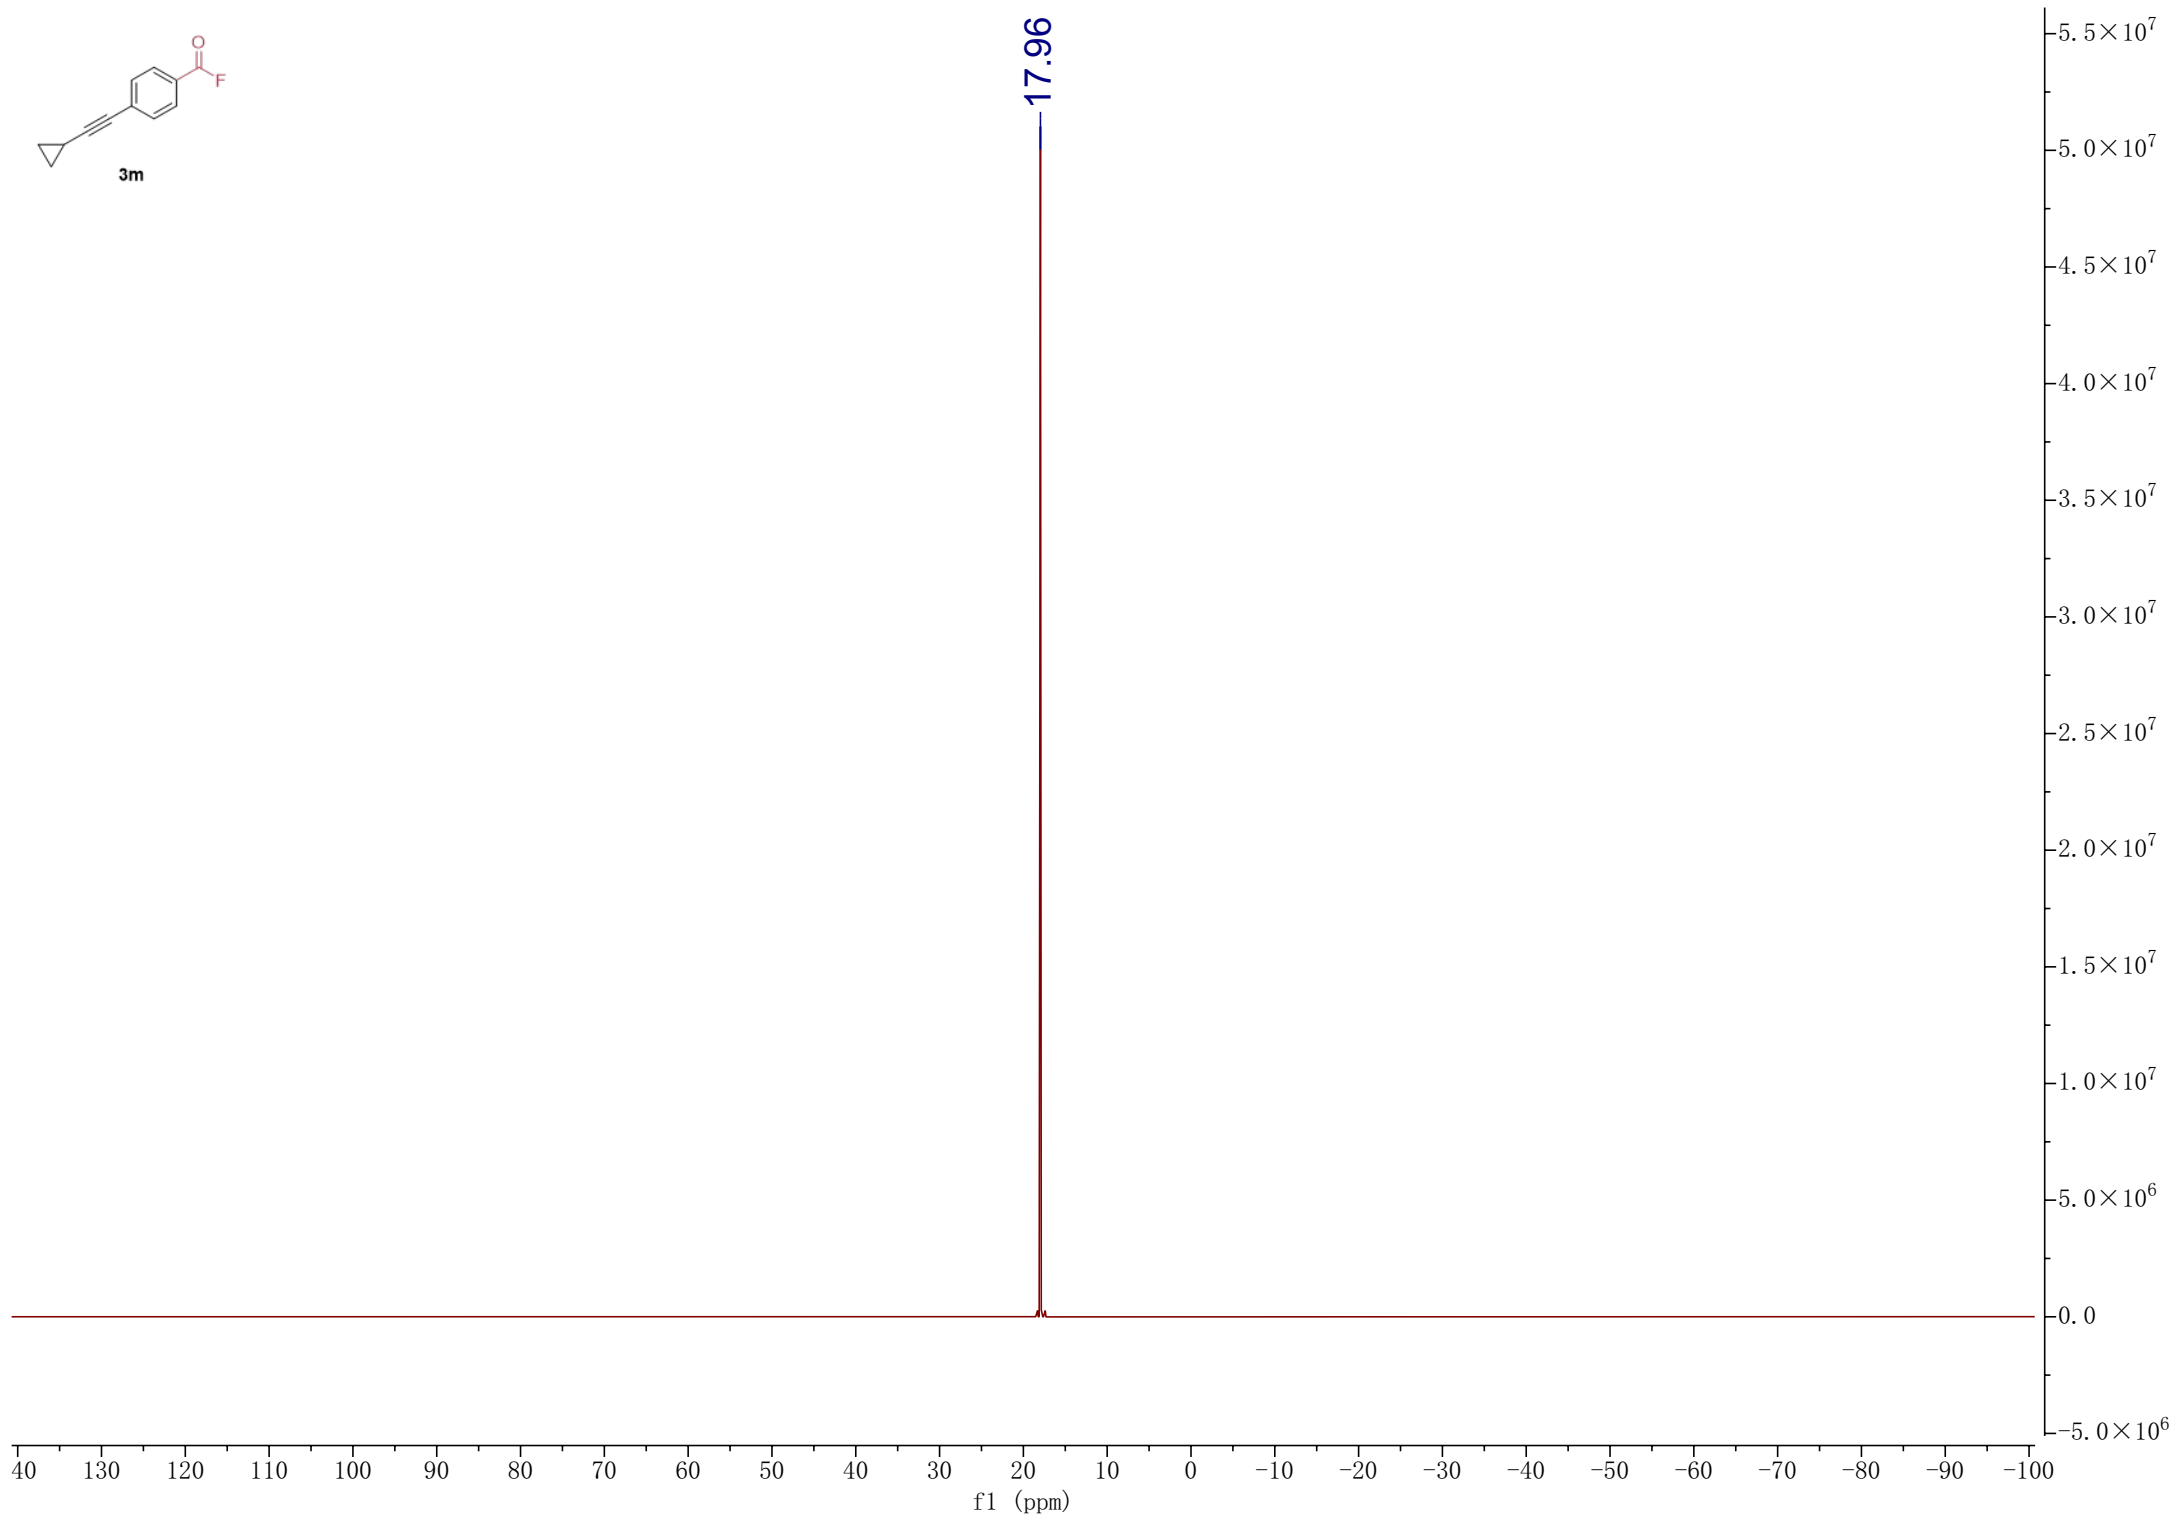

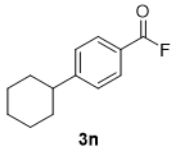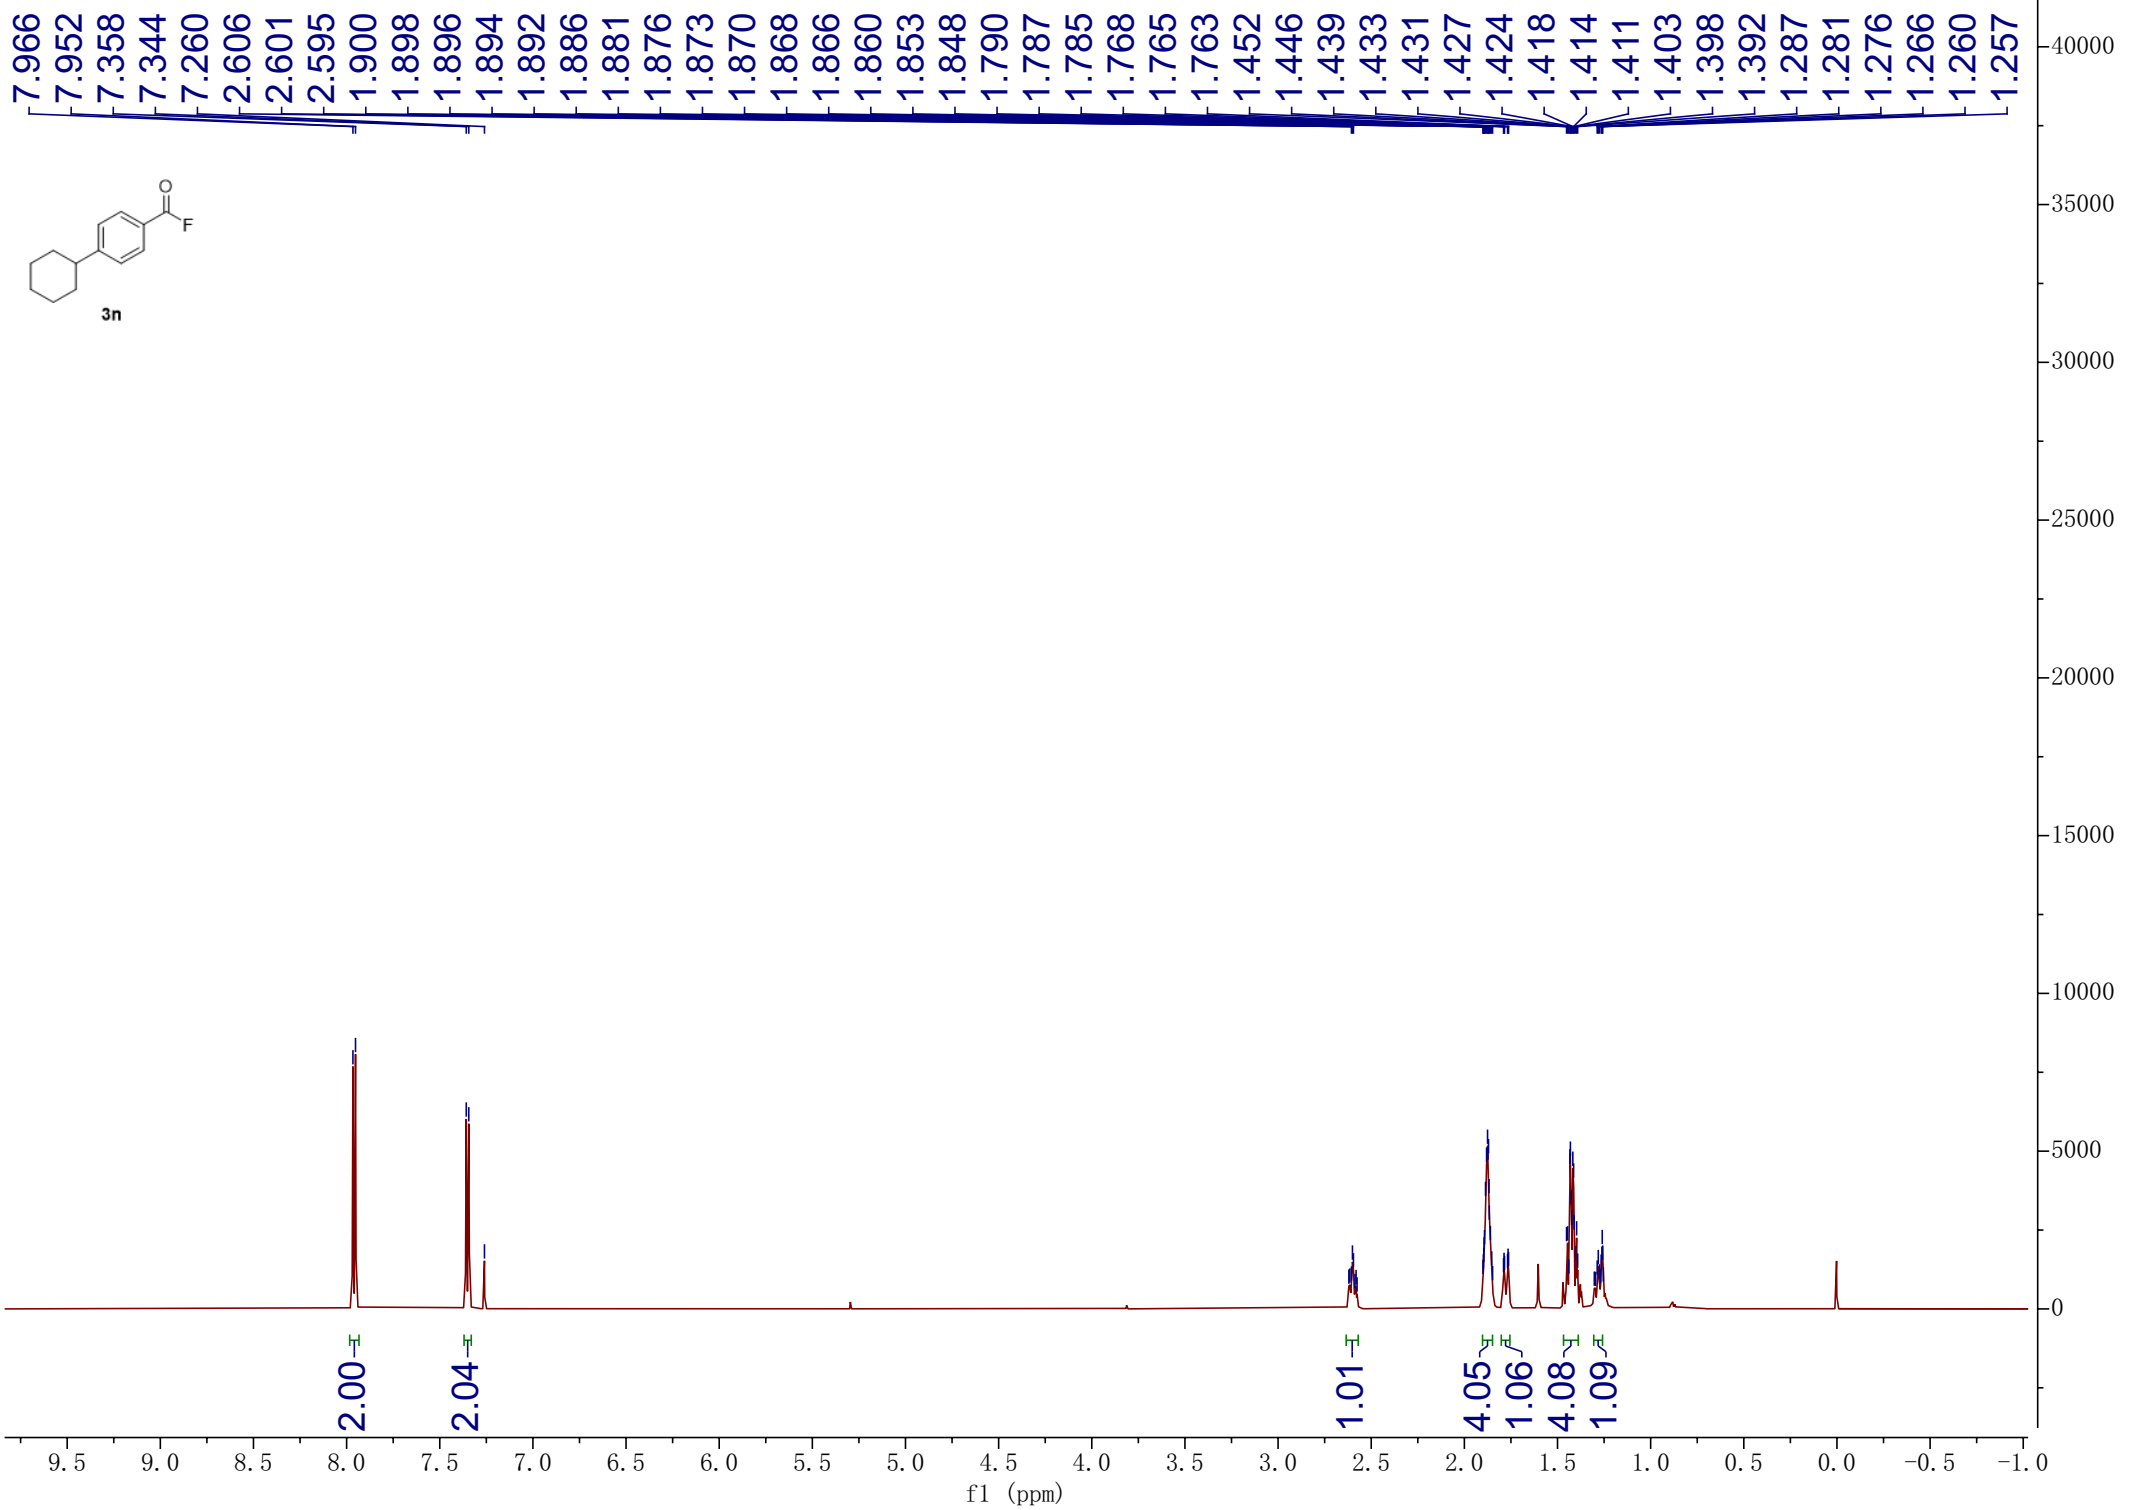

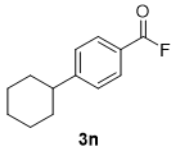

158.86  
156.59  
156.55

131.85  
131.82  
127.81  
122.78  
122.38

77.44  
77.23  
77.02

45.09

34.18  
26.83  
26.15

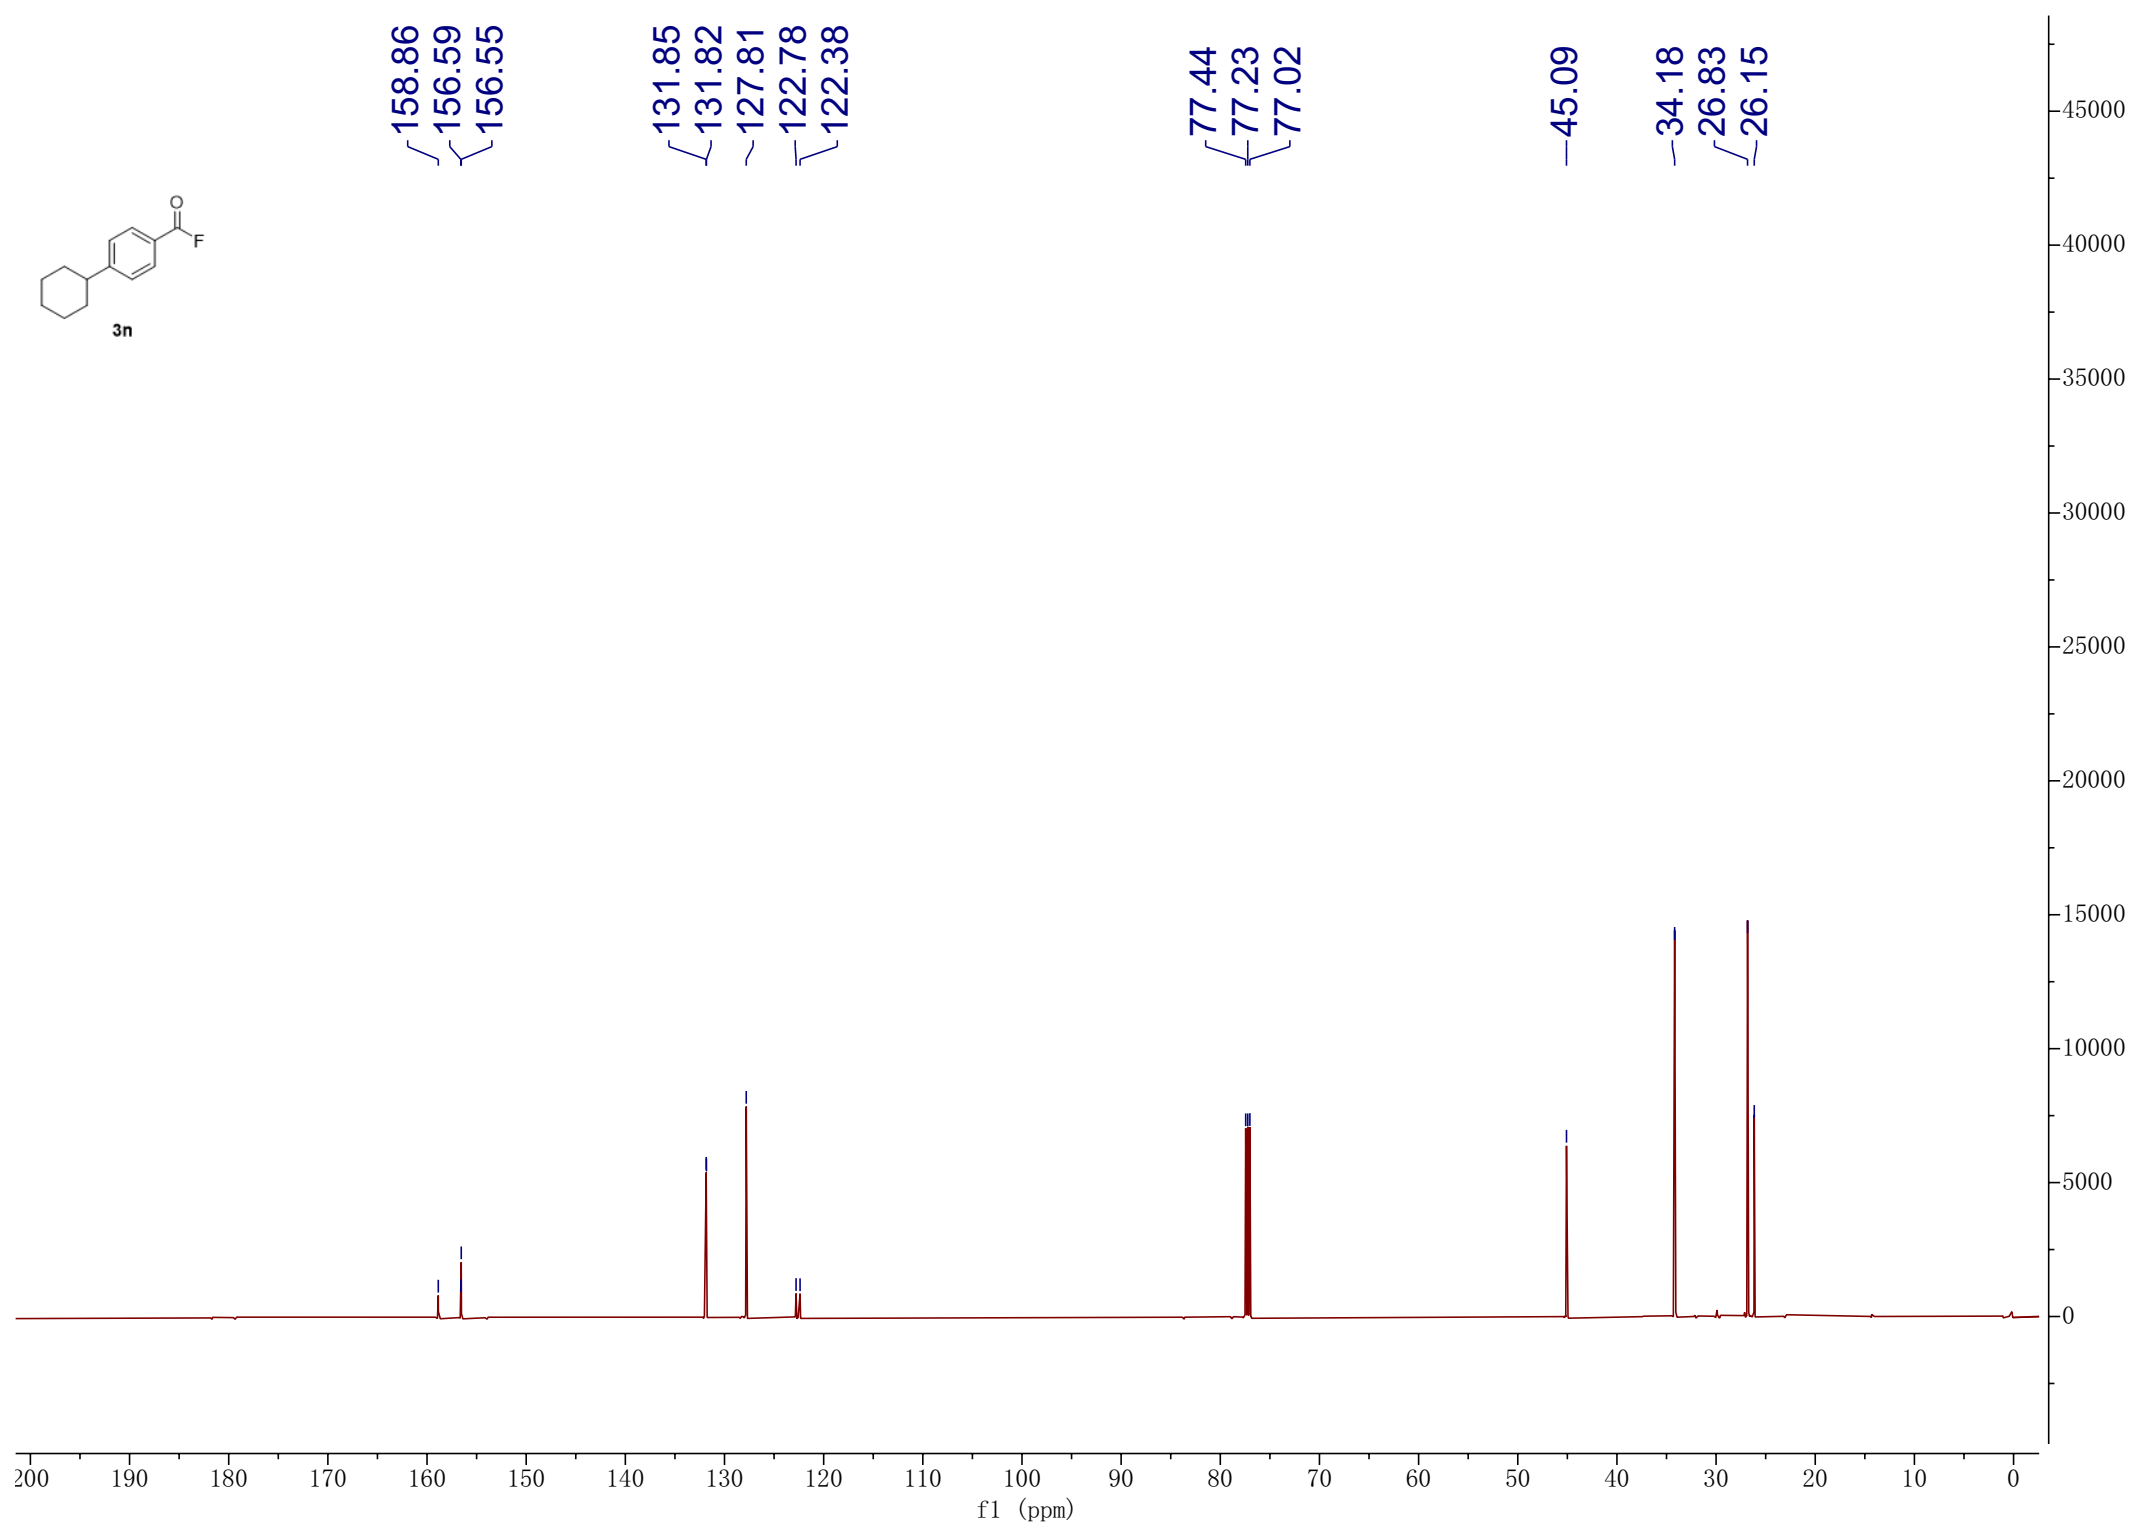

-17.467

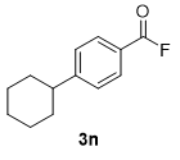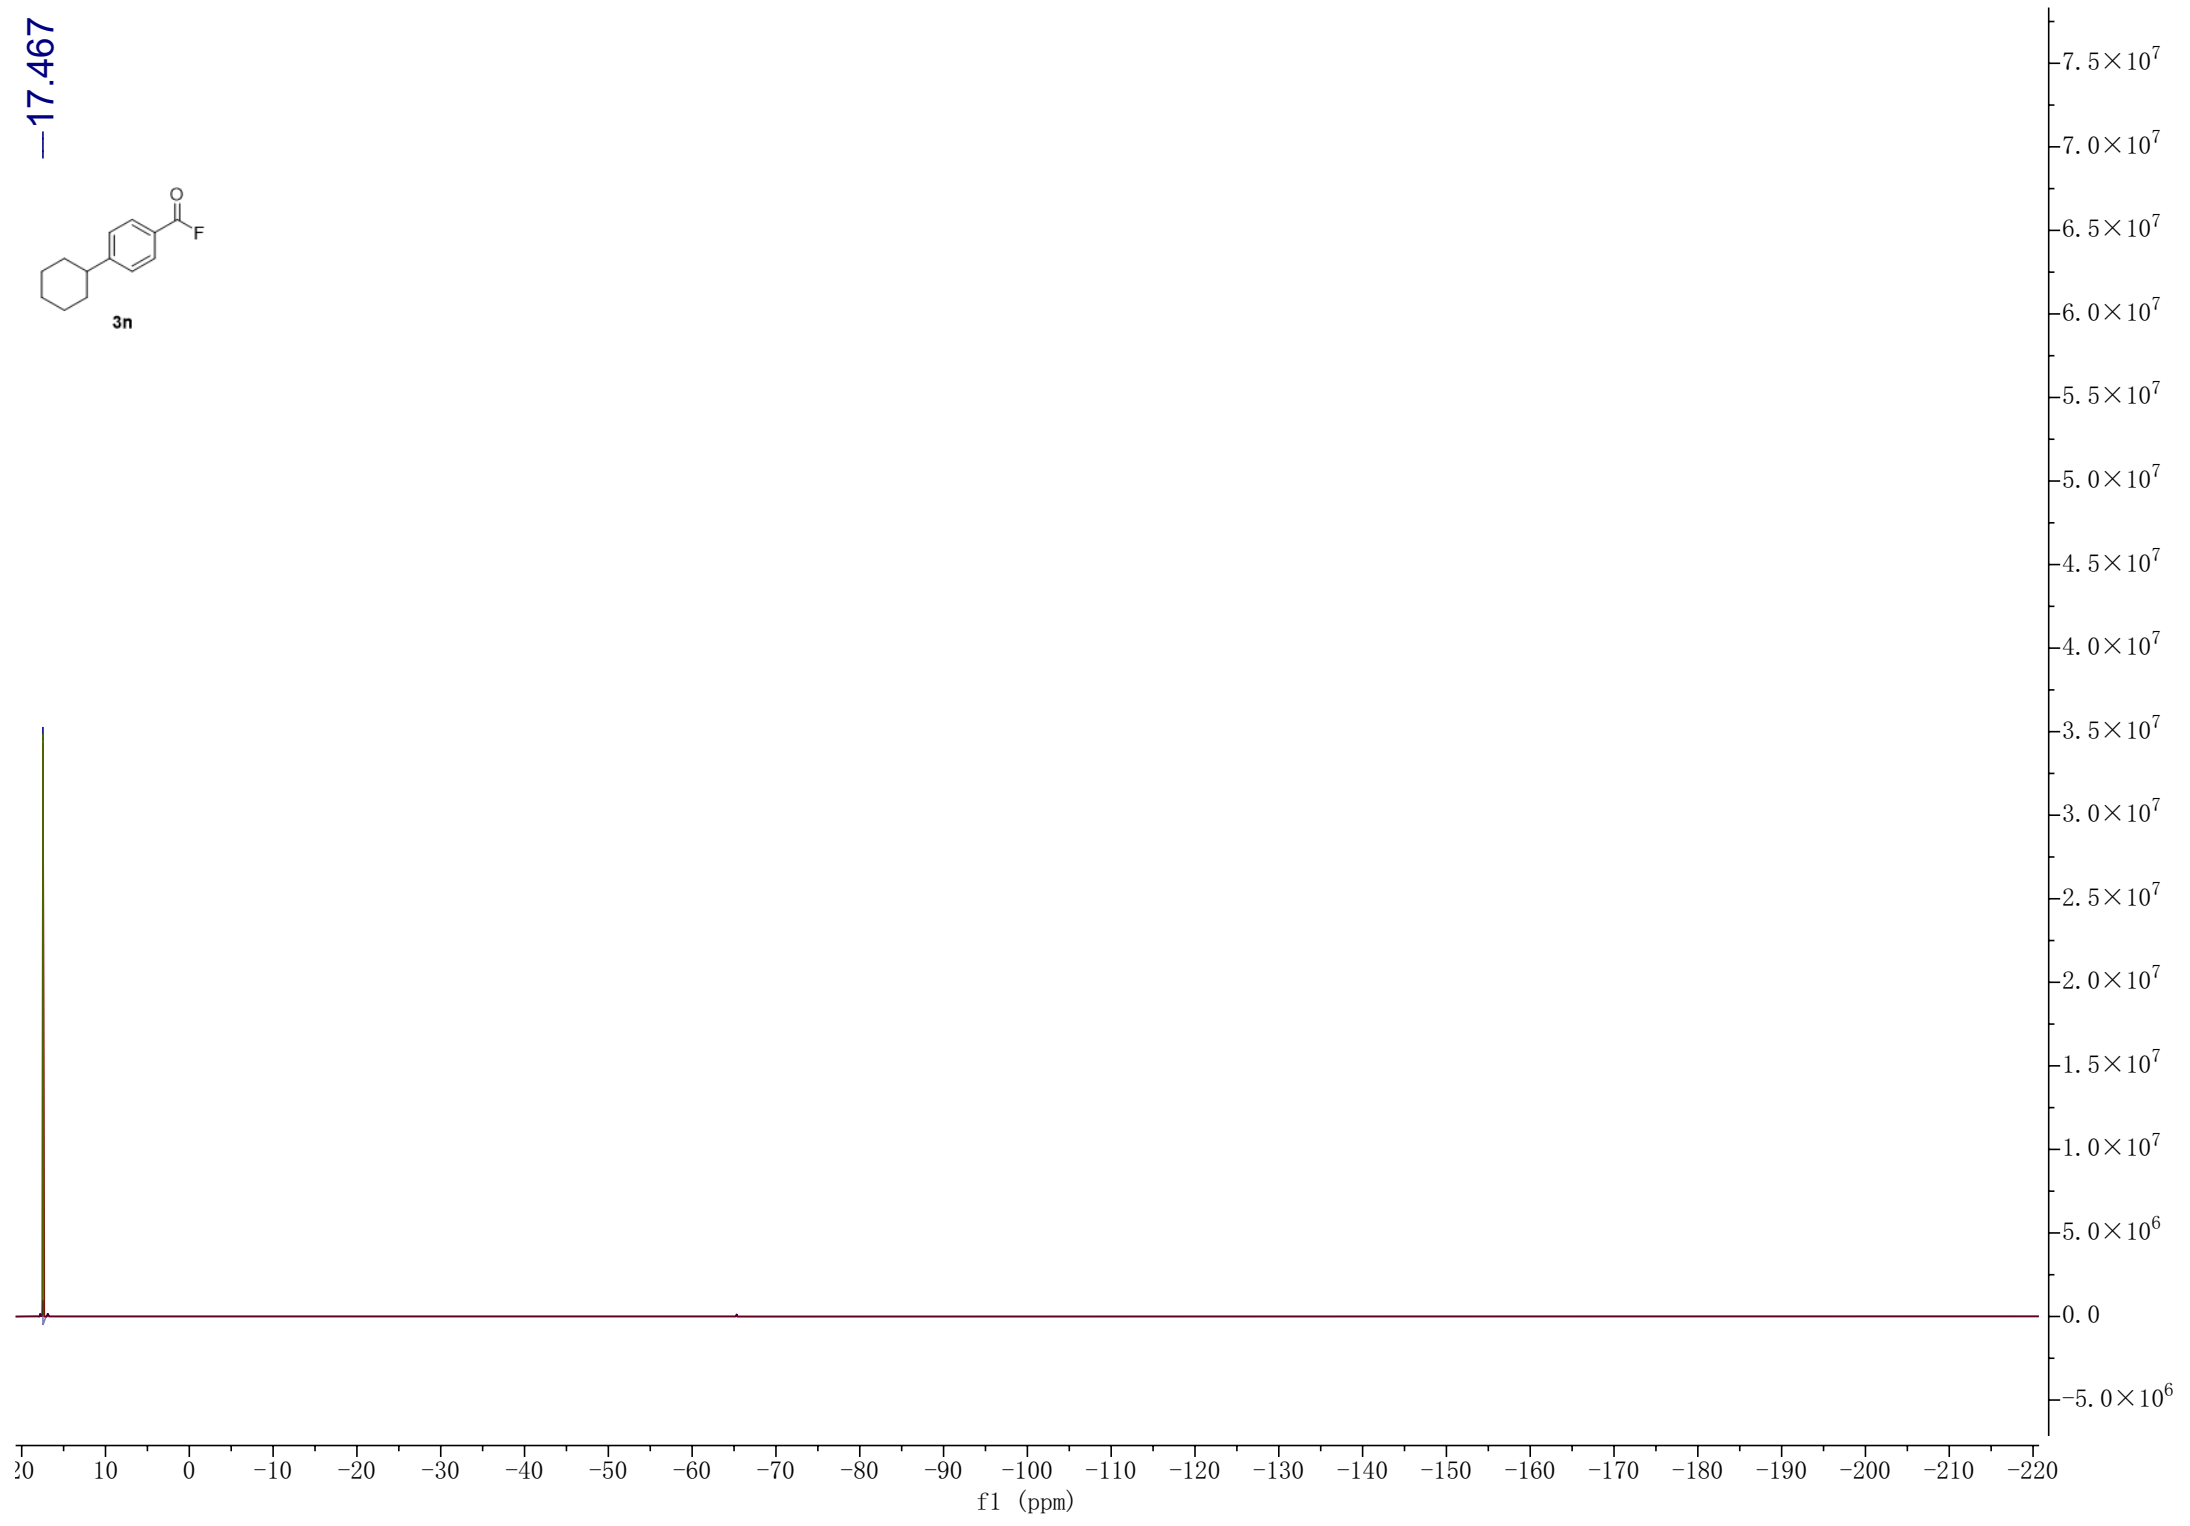

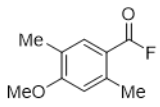

3o

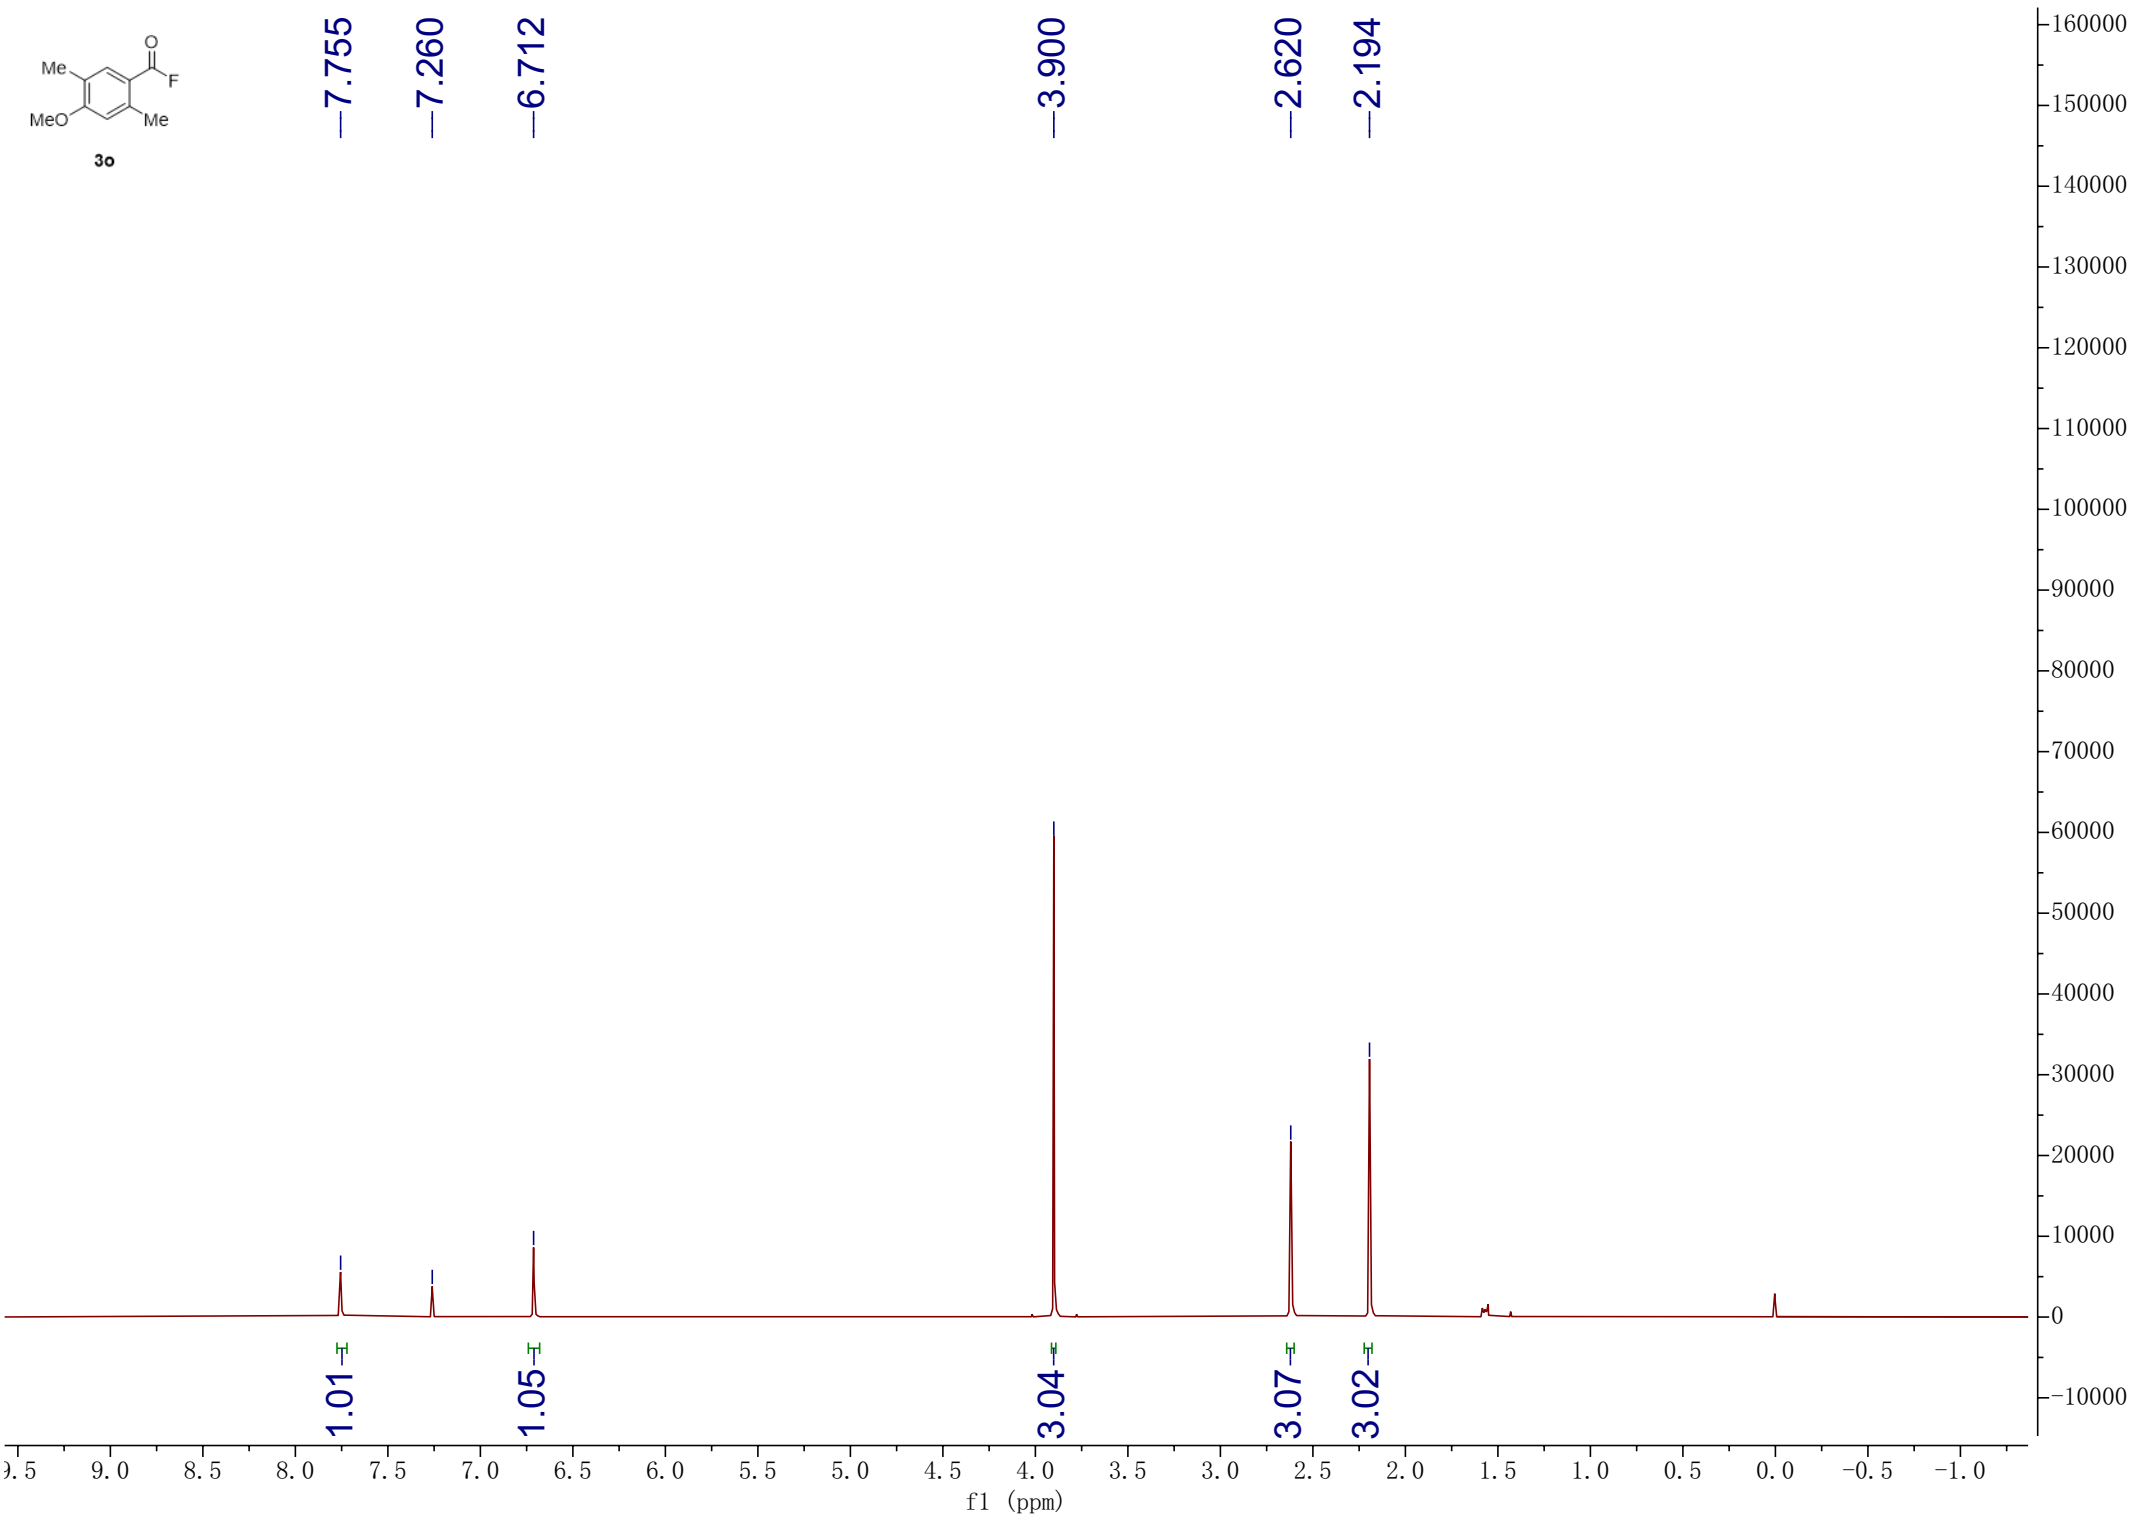

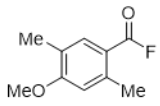

3o

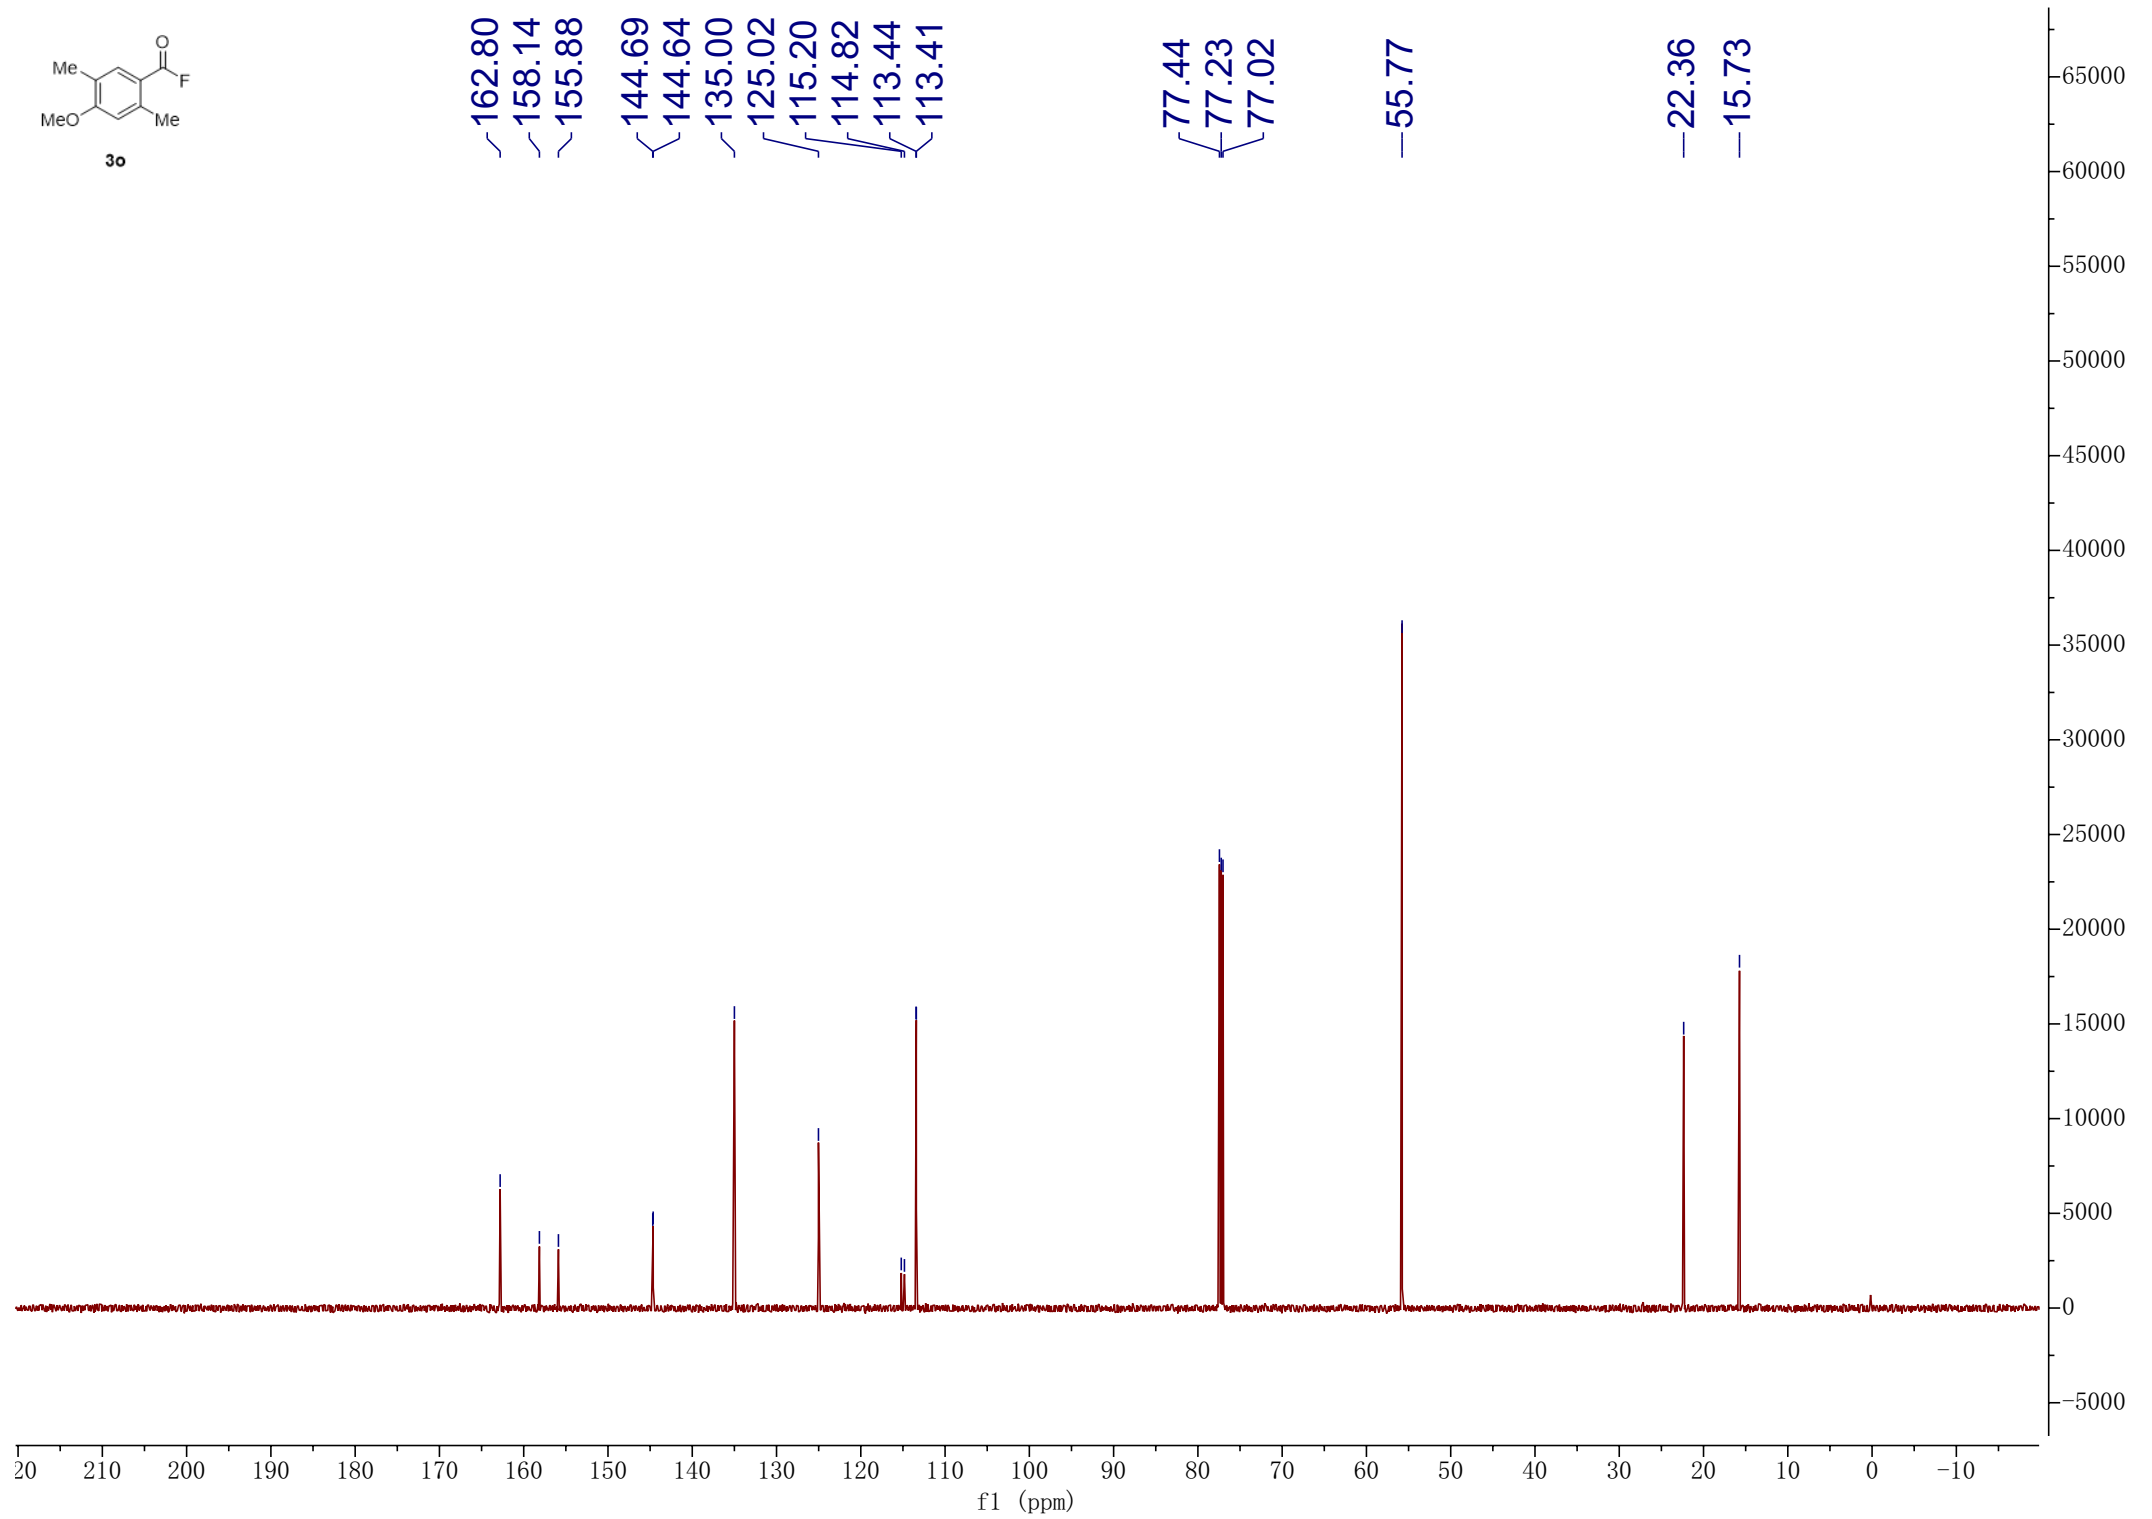

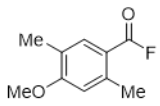

3o

—26.503

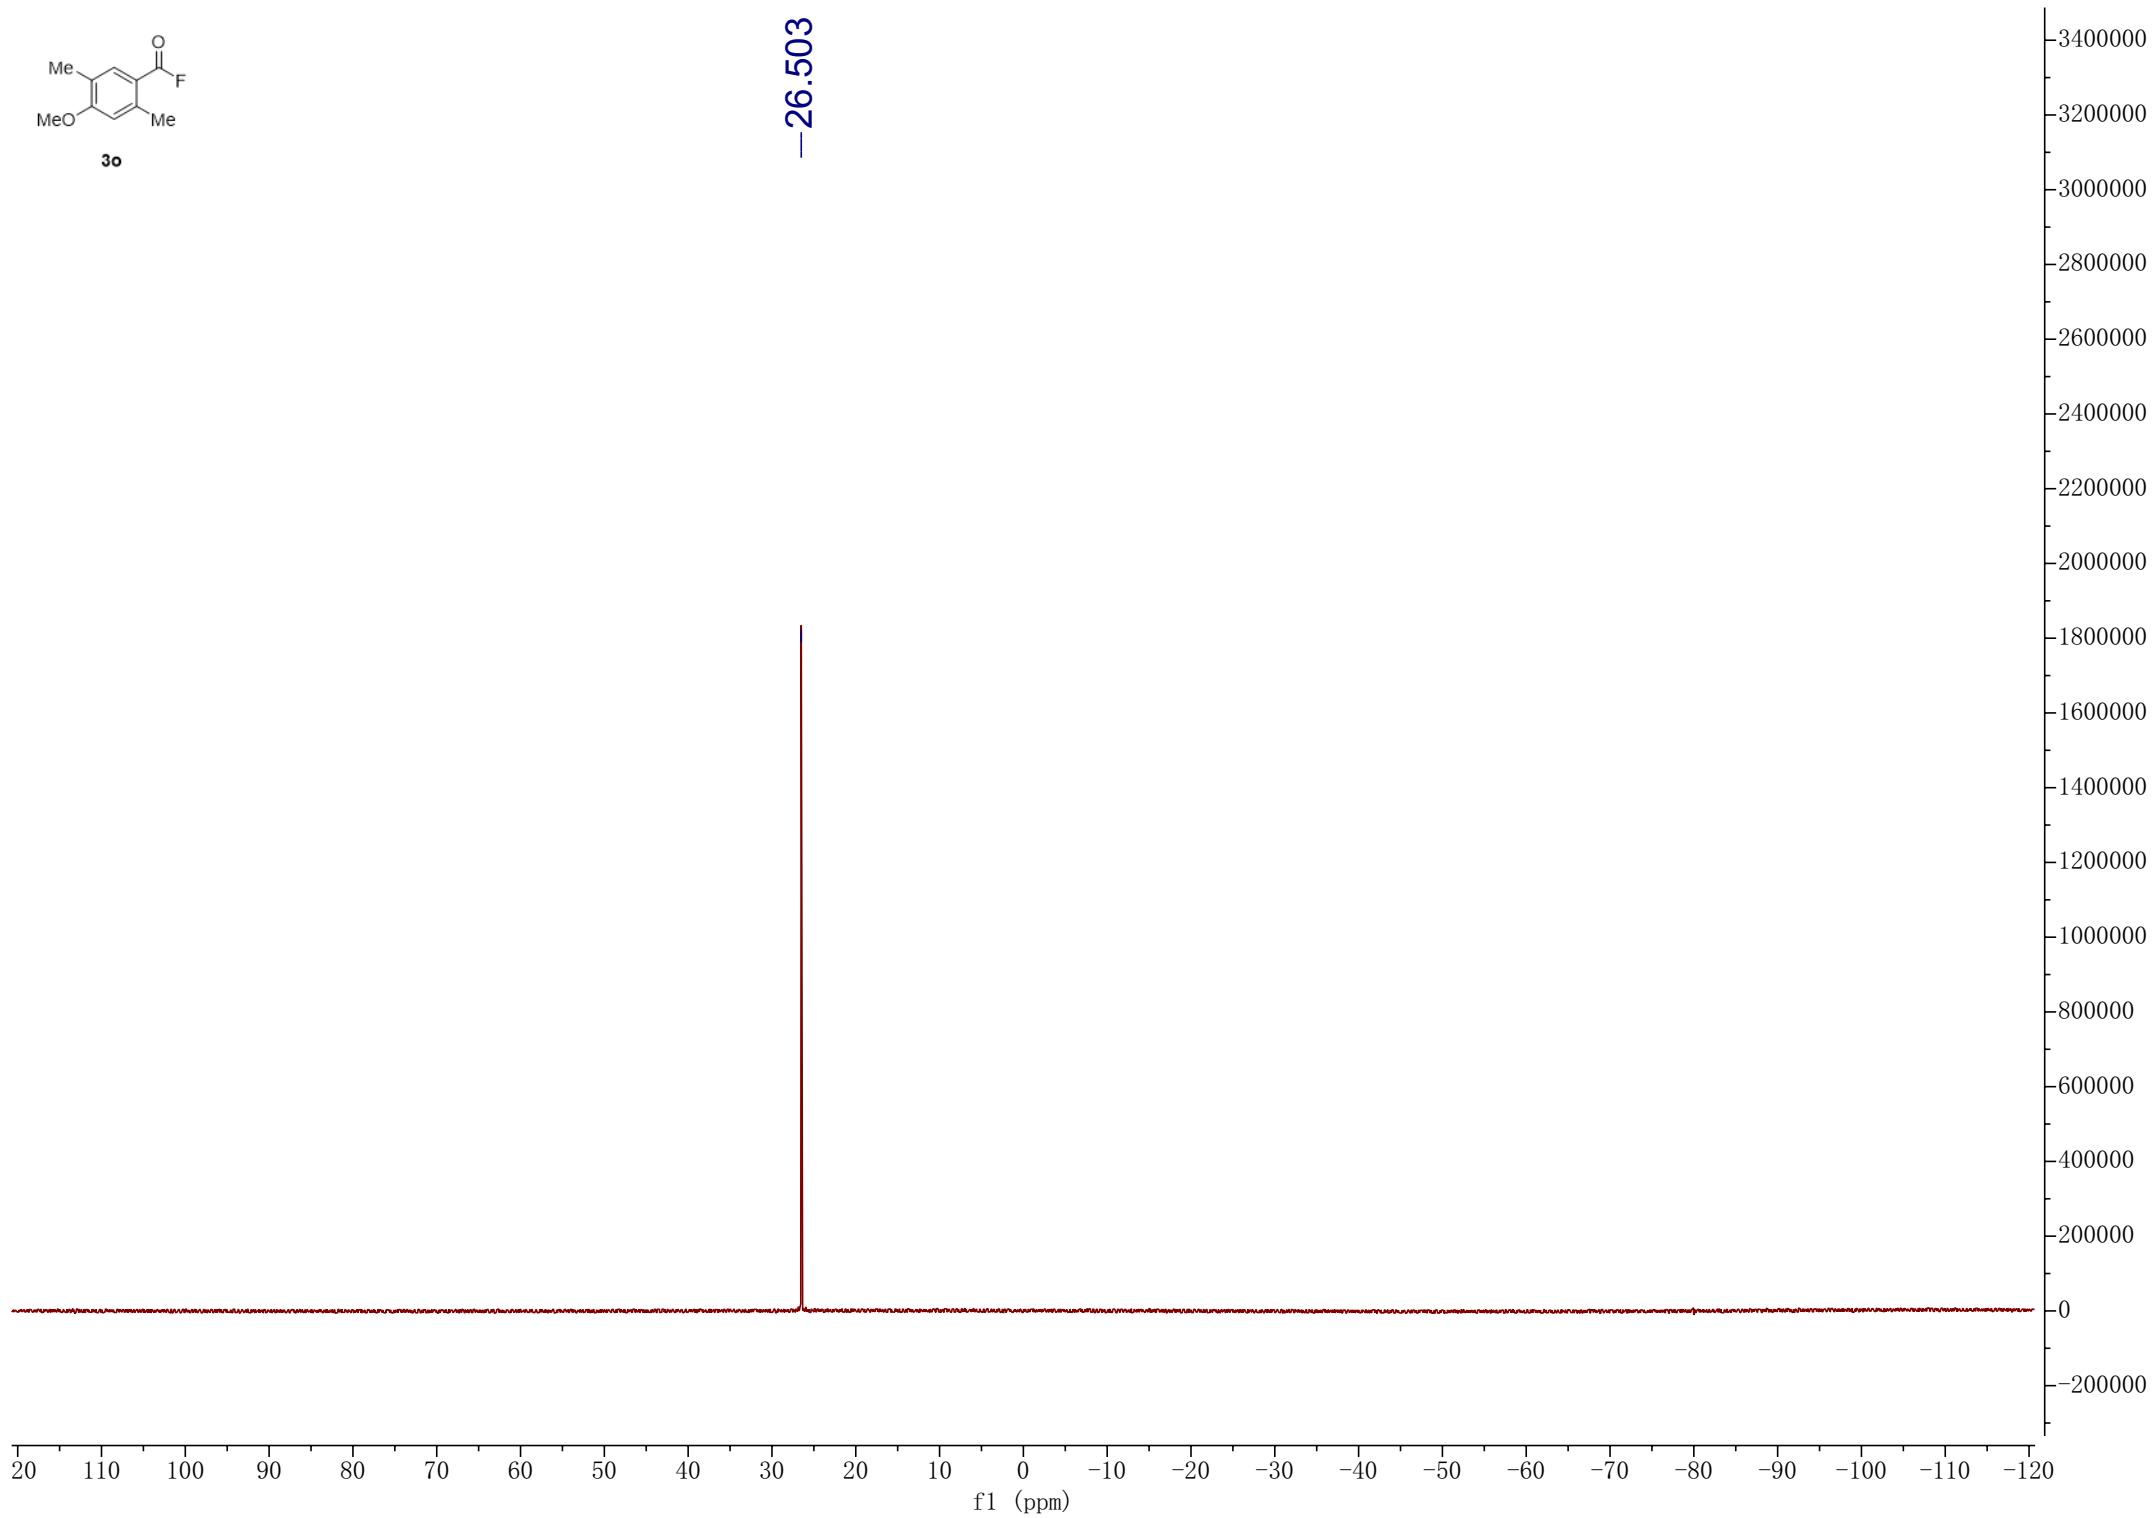

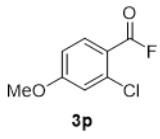

7.991  
7.976  
7.260  
7.049  
7.047  
7.045  
7.043  
6.895  
6.891  
6.881  
6.876

3.894

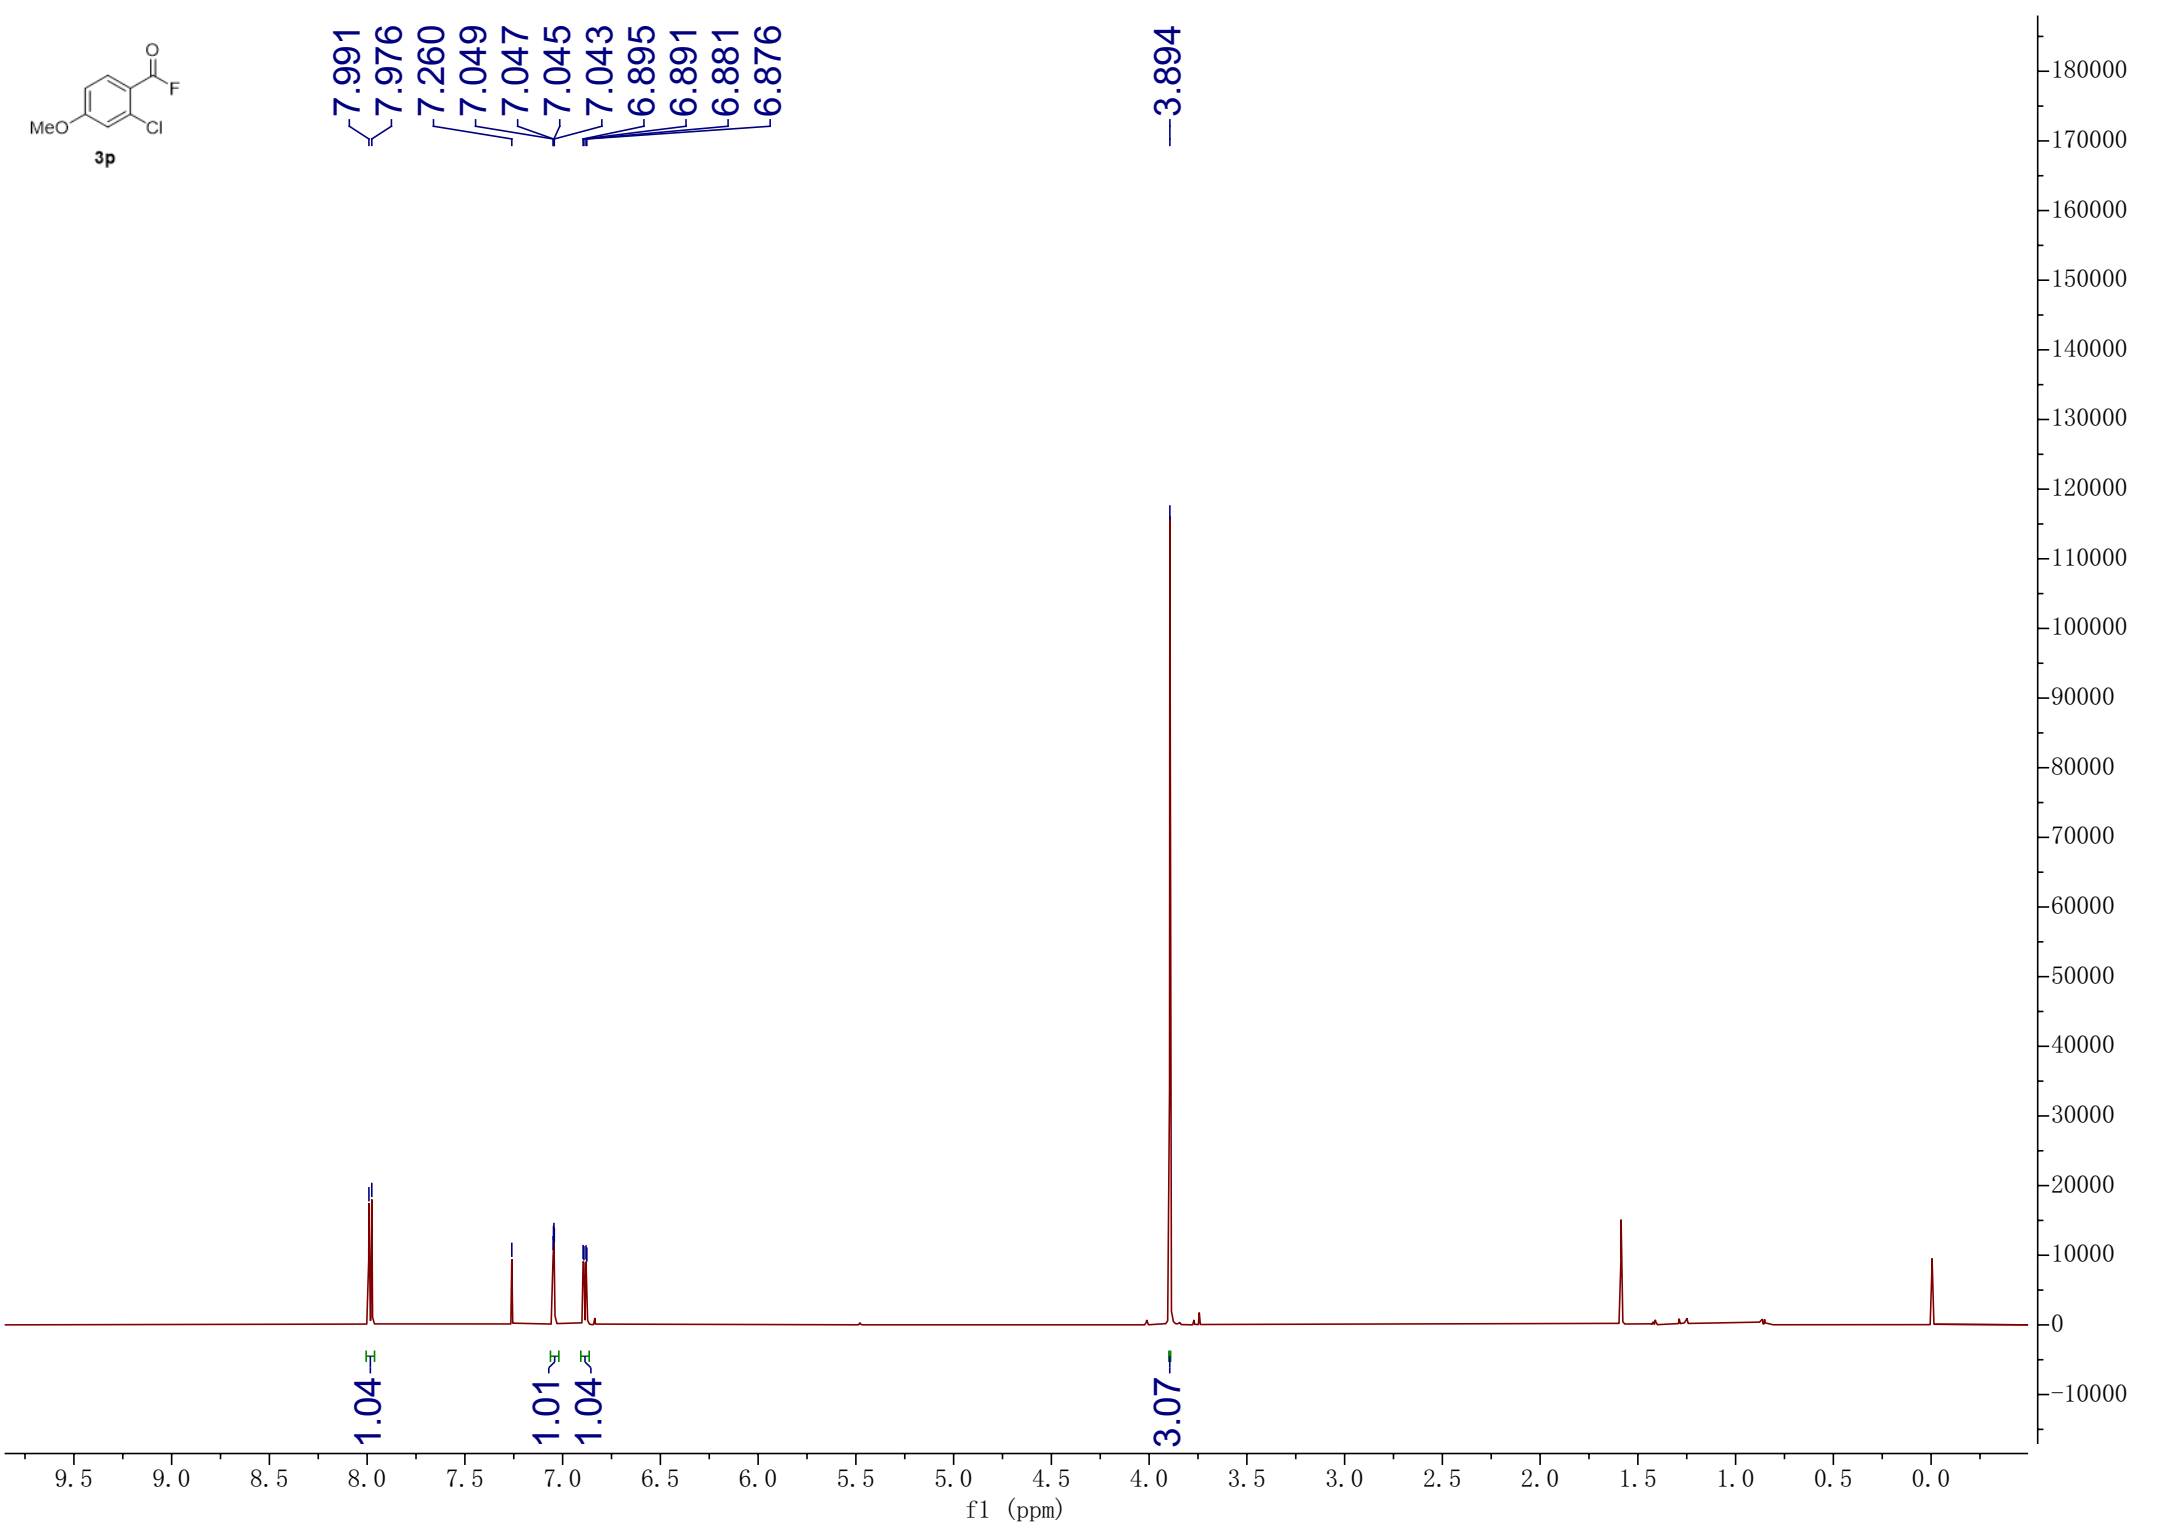

1.04

1.01

1.04

3.07

9.5 9.0 8.5 8.0 7.5 7.0 6.5 6.0 5.5 5.0 4.5 4.0 3.5 3.0 2.5 2.0 1.5 1.0 0.5 0.0

f1 (ppm)

180000  
170000  
160000  
150000  
140000  
130000  
120000  
110000  
100000  
90000  
80000  
70000  
60000  
50000  
40000  
30000  
20000  
10000  
0  
-10000





164.90  
155.59  
153.34  
139.36  
139.32  
135.72  
135.70  
117.58  
117.56  
115.60  
115.19  
113.28

77.44  
77.23  
77.02

-56.20

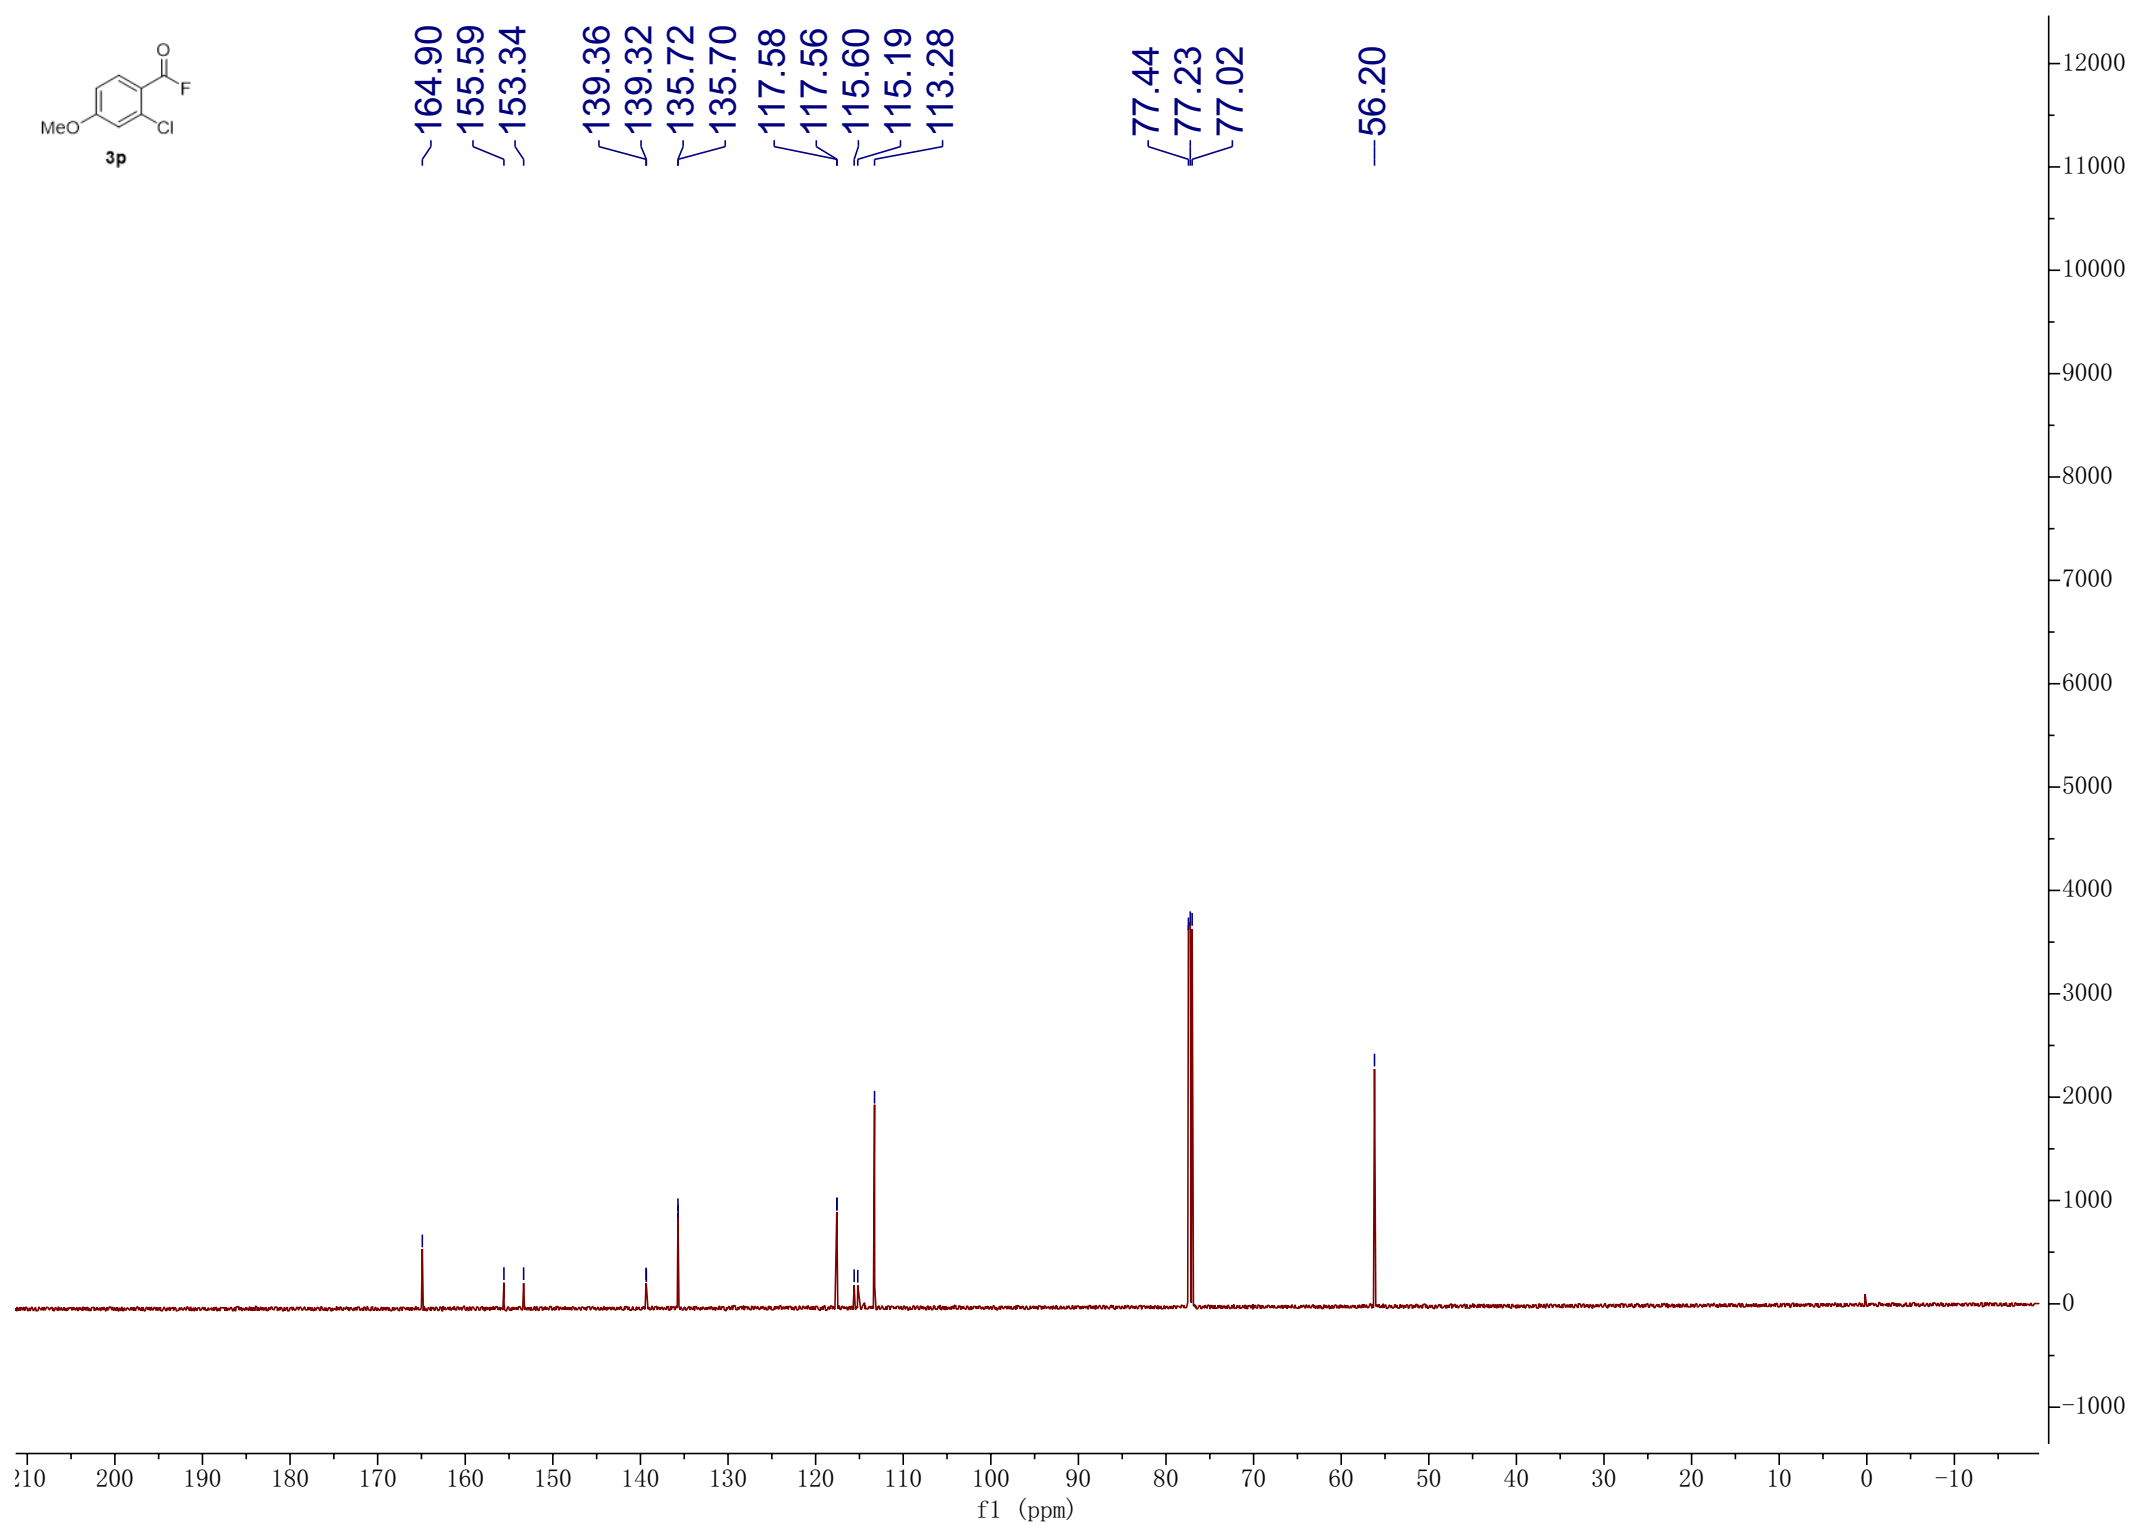

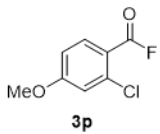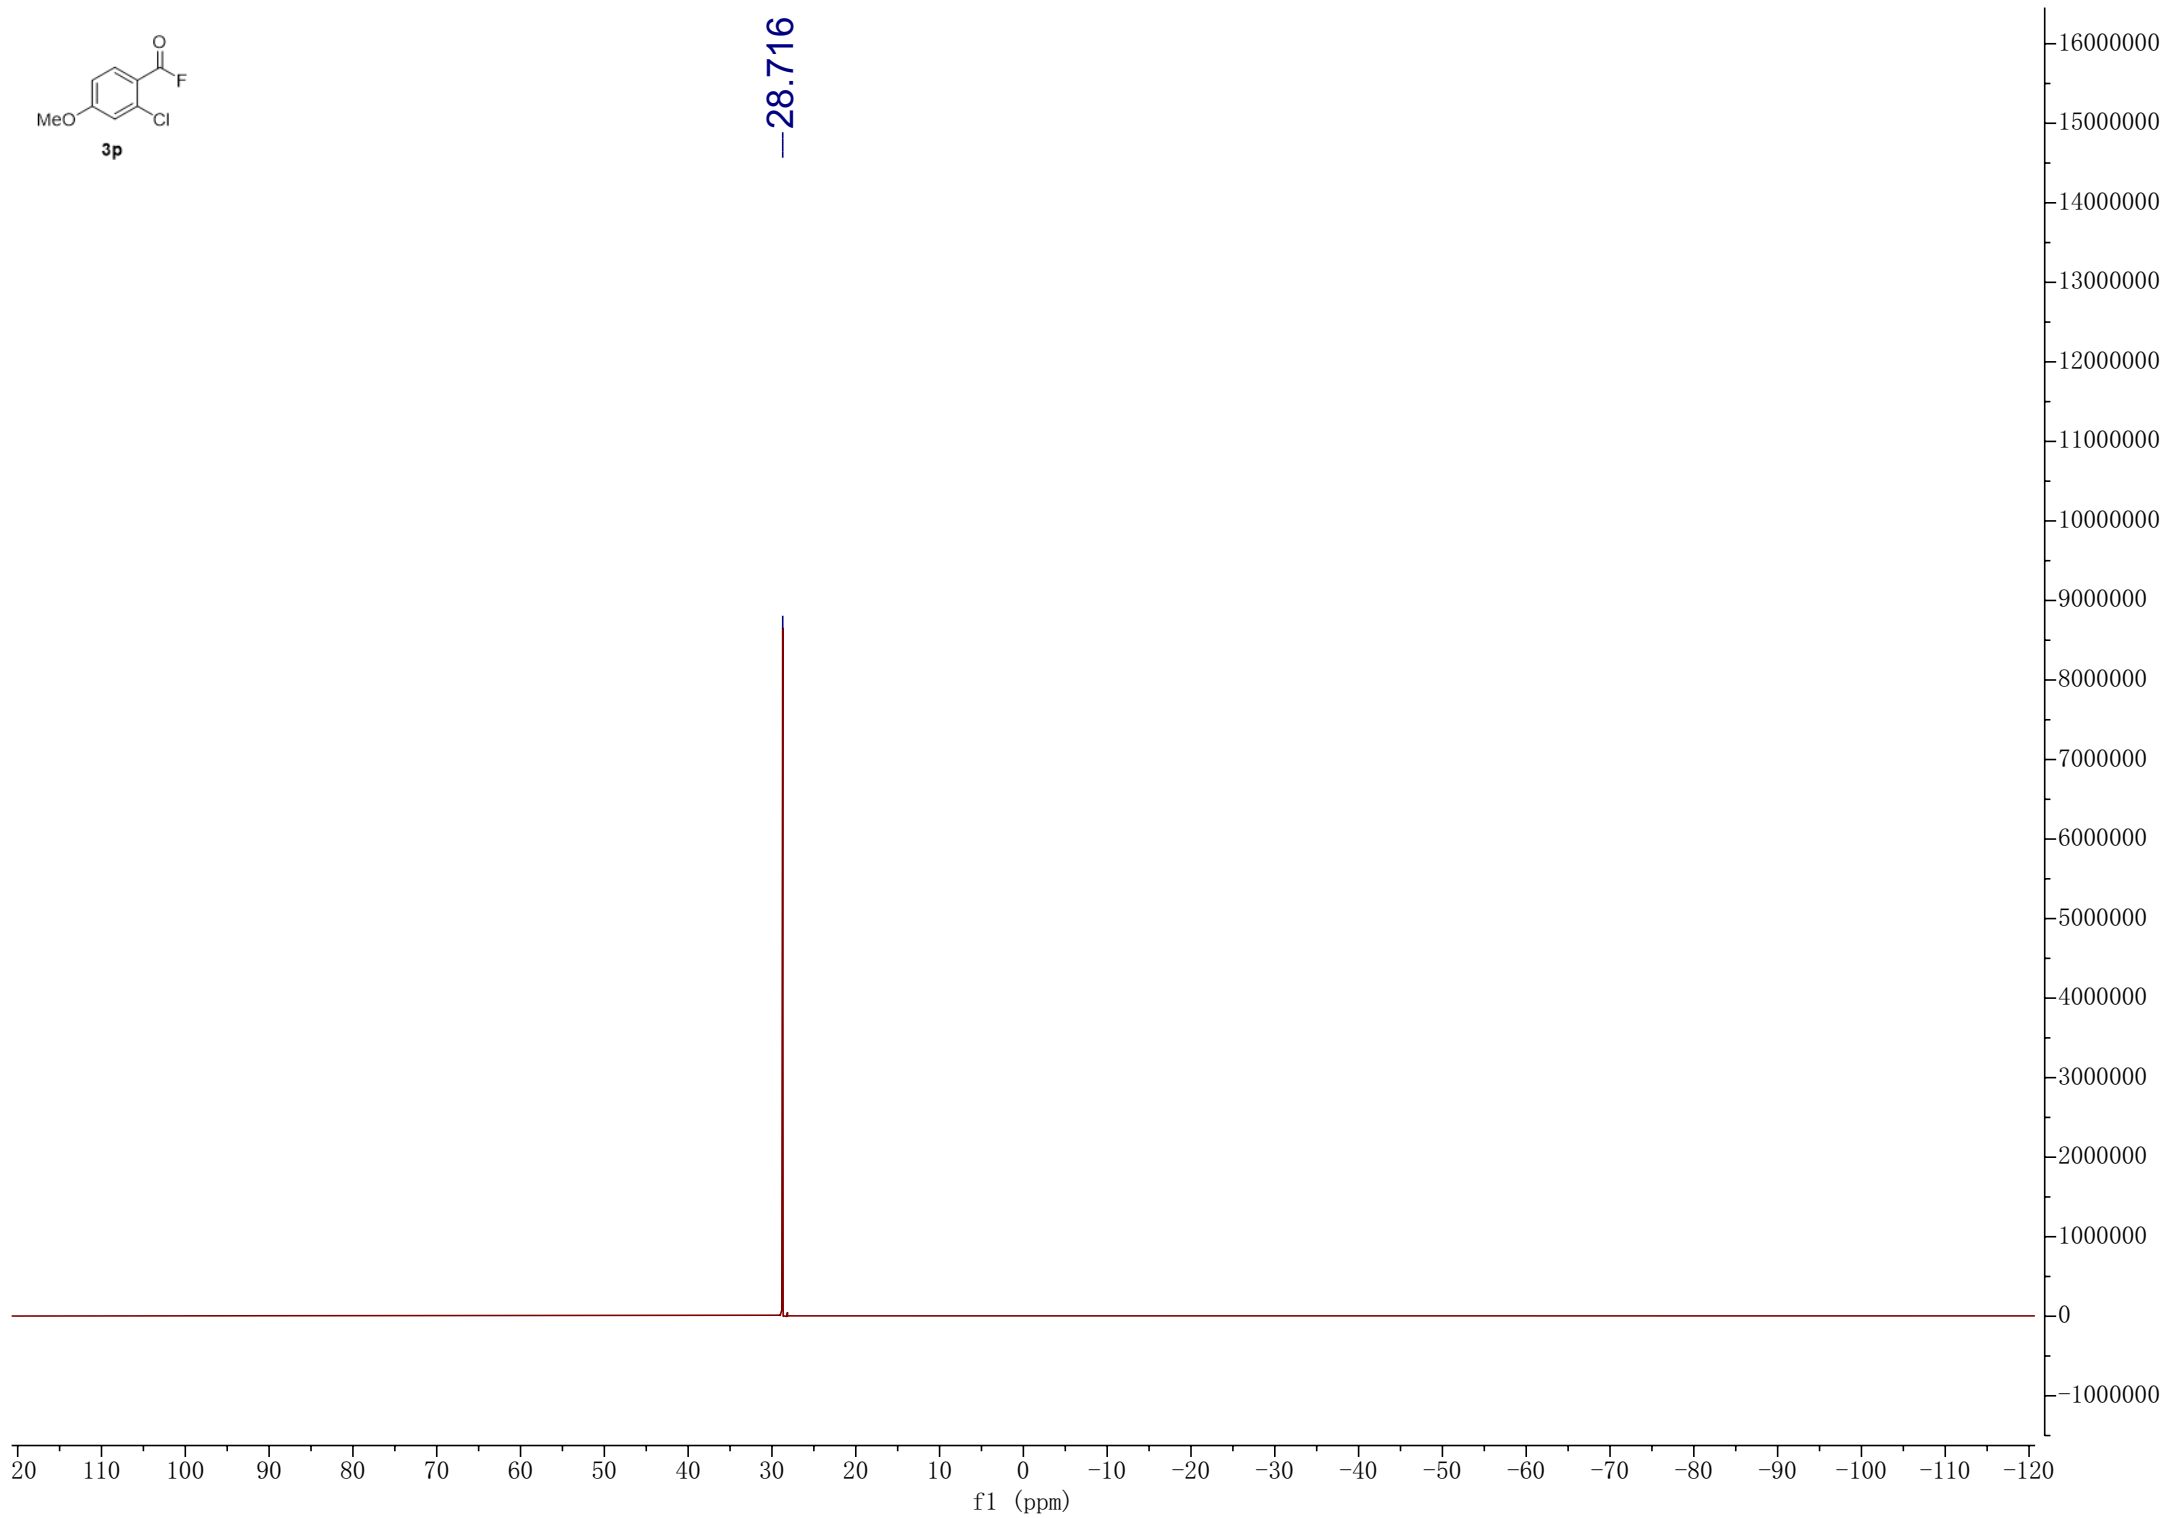

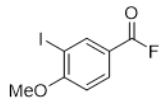

3q

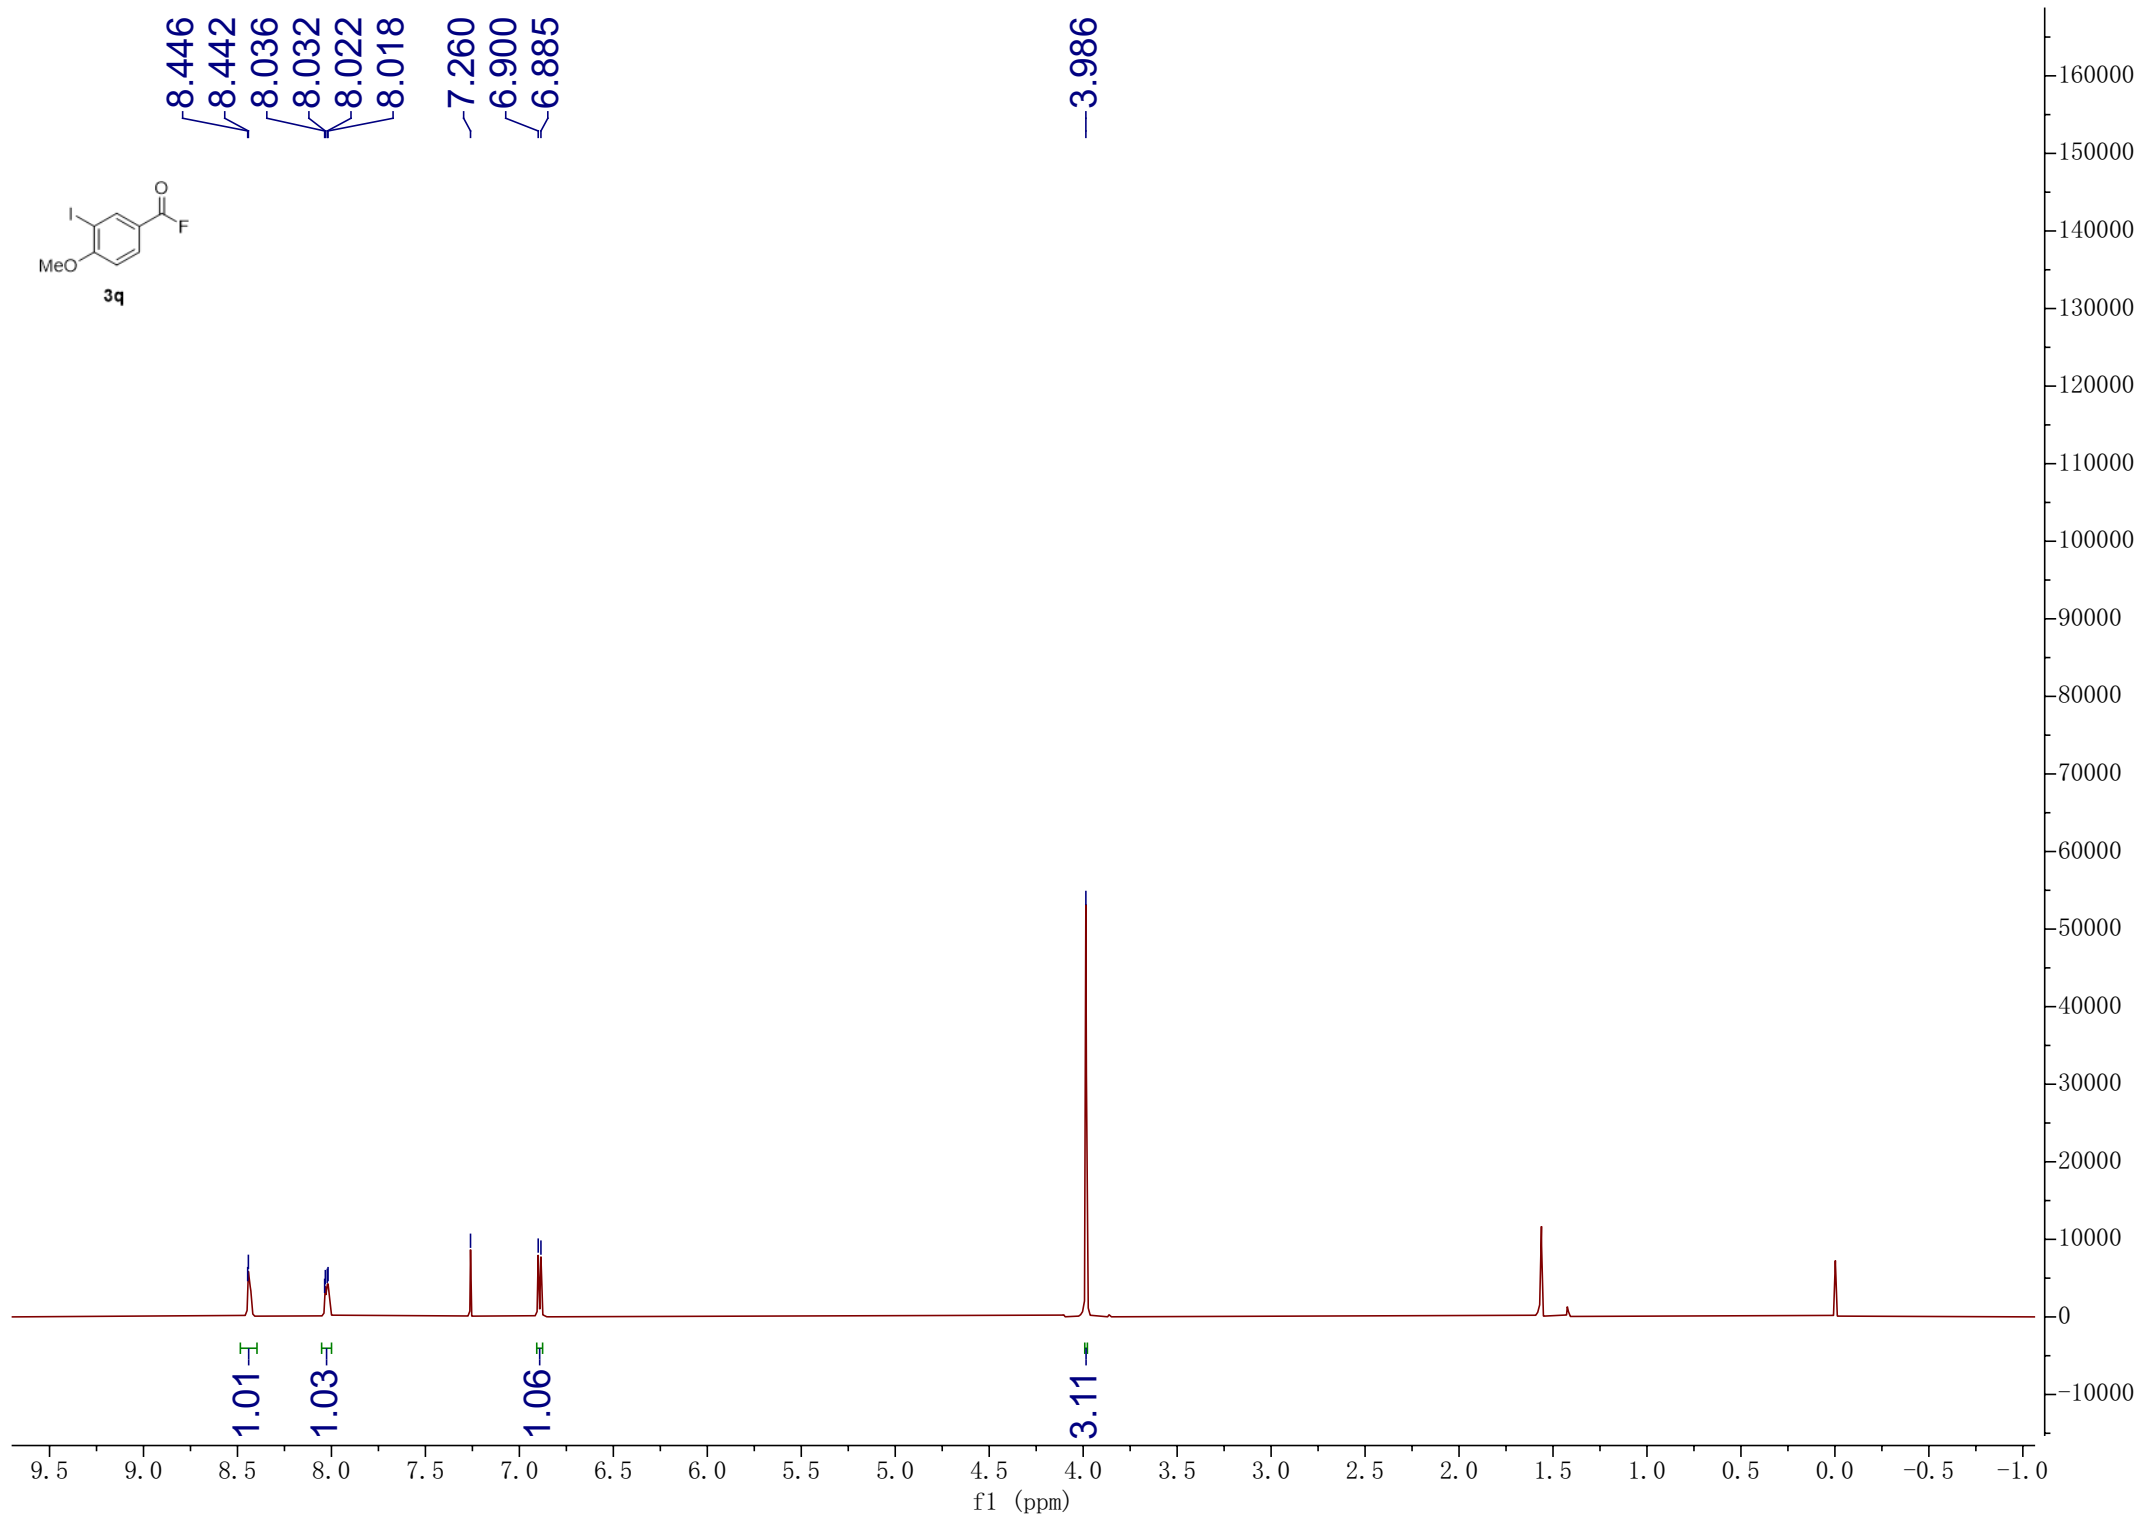

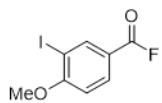

3q

163.73  
157.20  
154.94  
142.96  
142.93  
133.96  
133.94  
119.07  
118.65  
110.62  
86.17  
77.44  
77.23  
77.02  
57.05

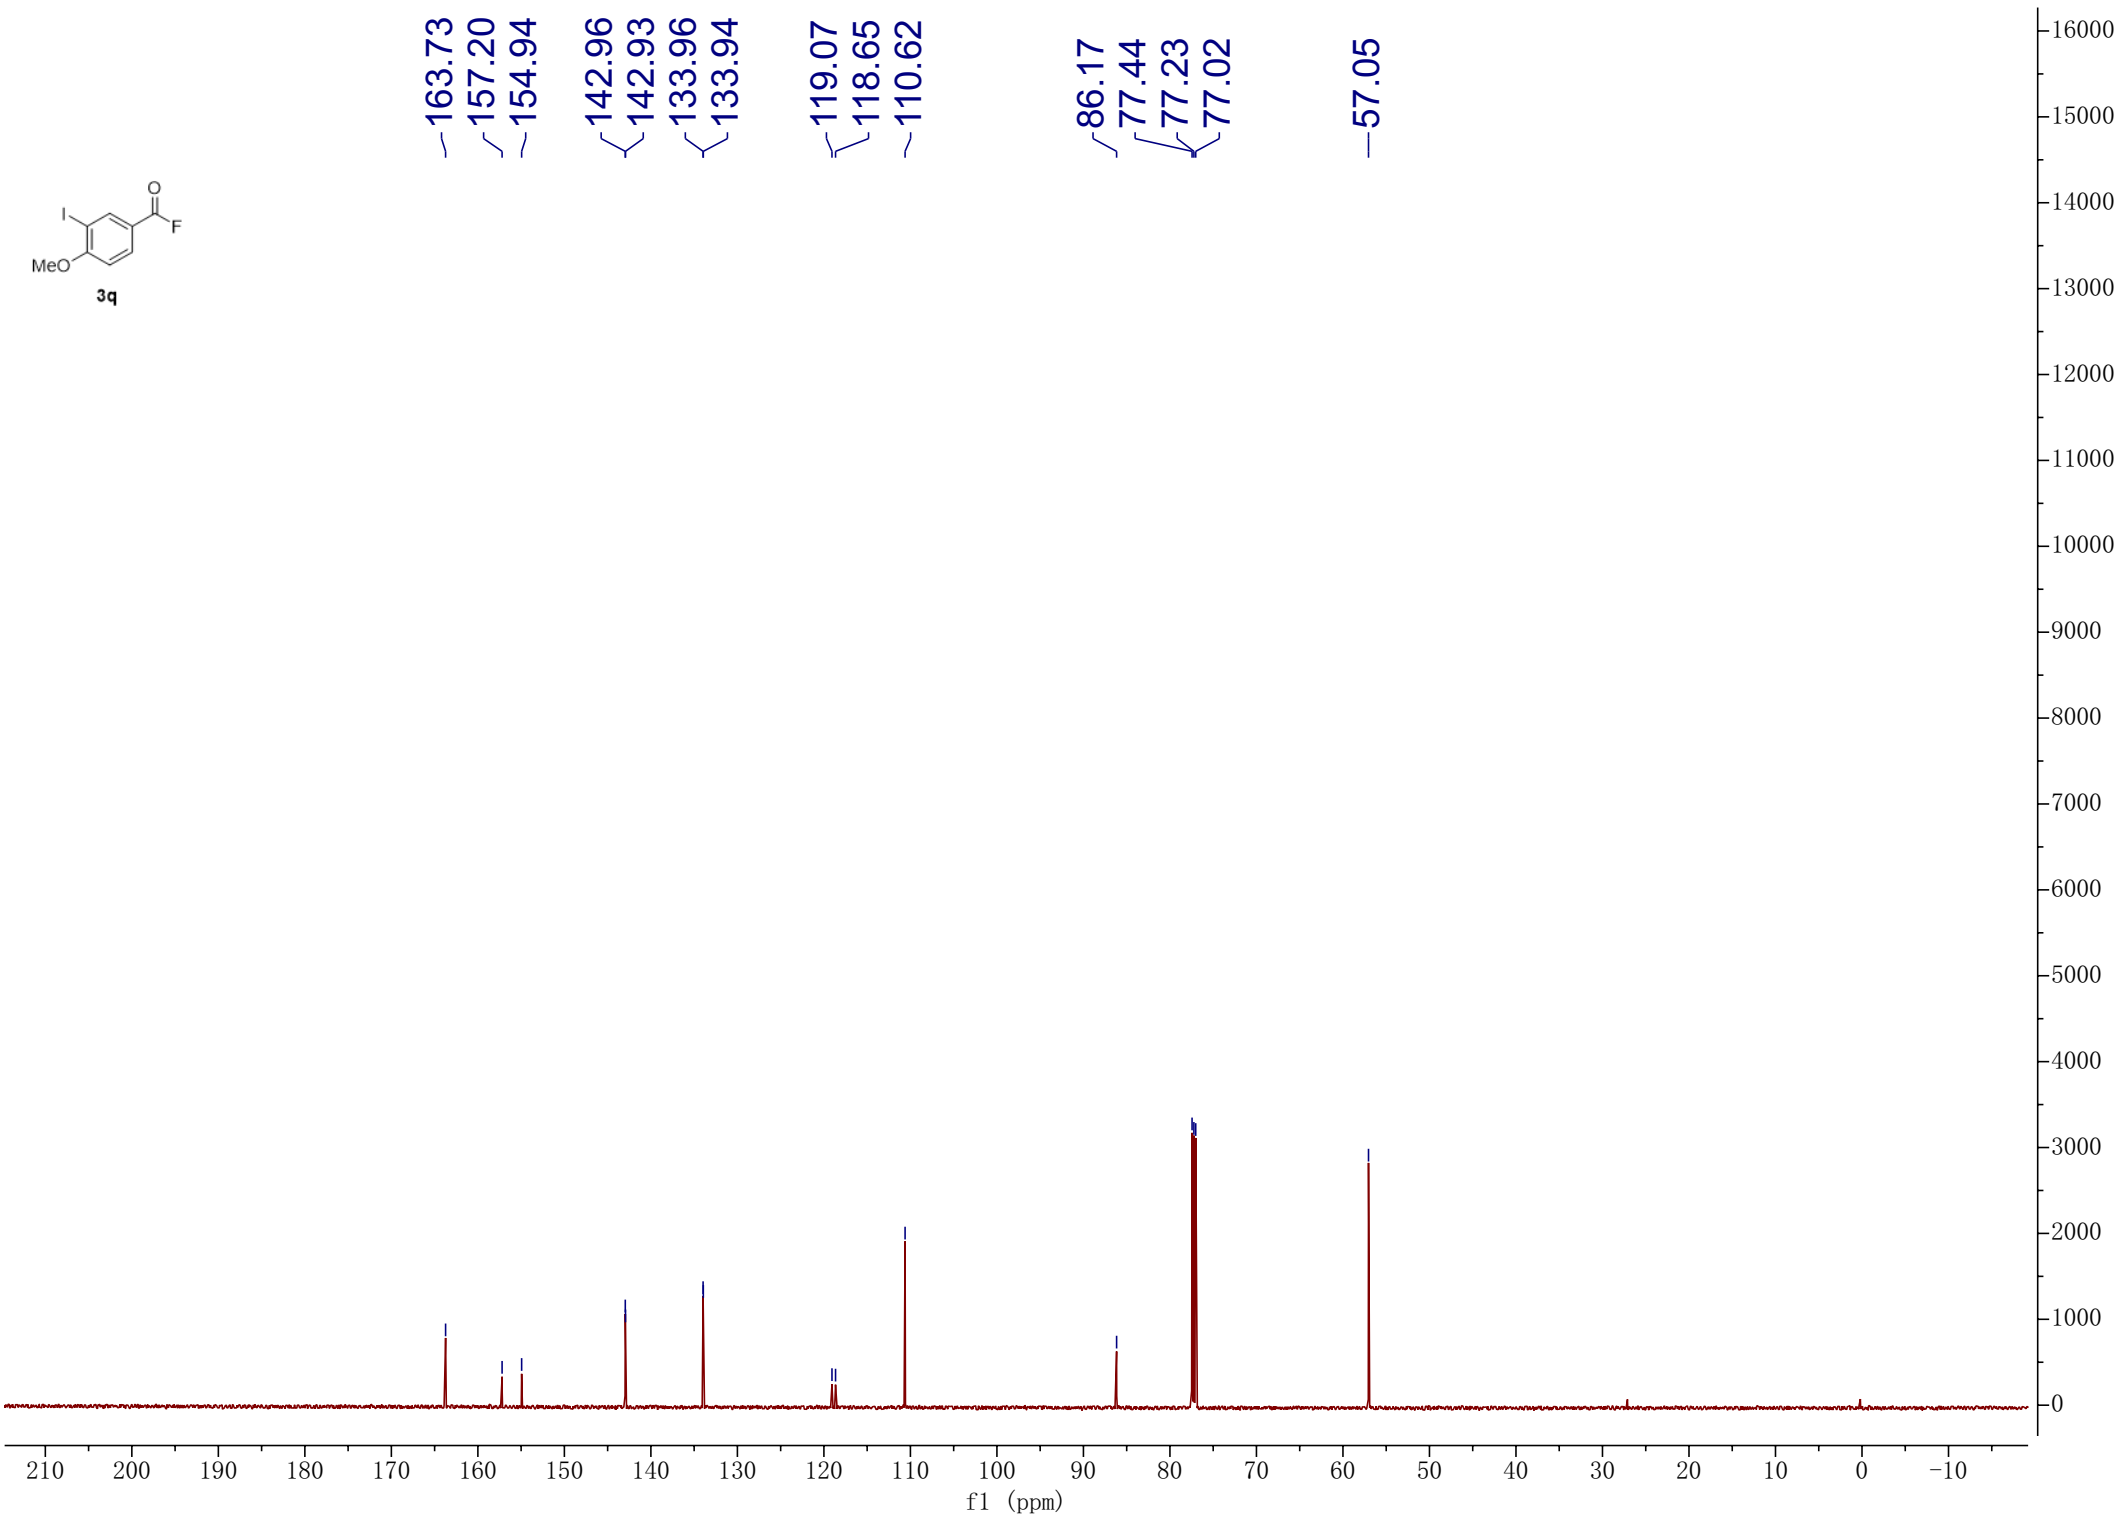

16.666

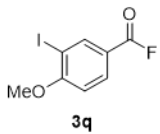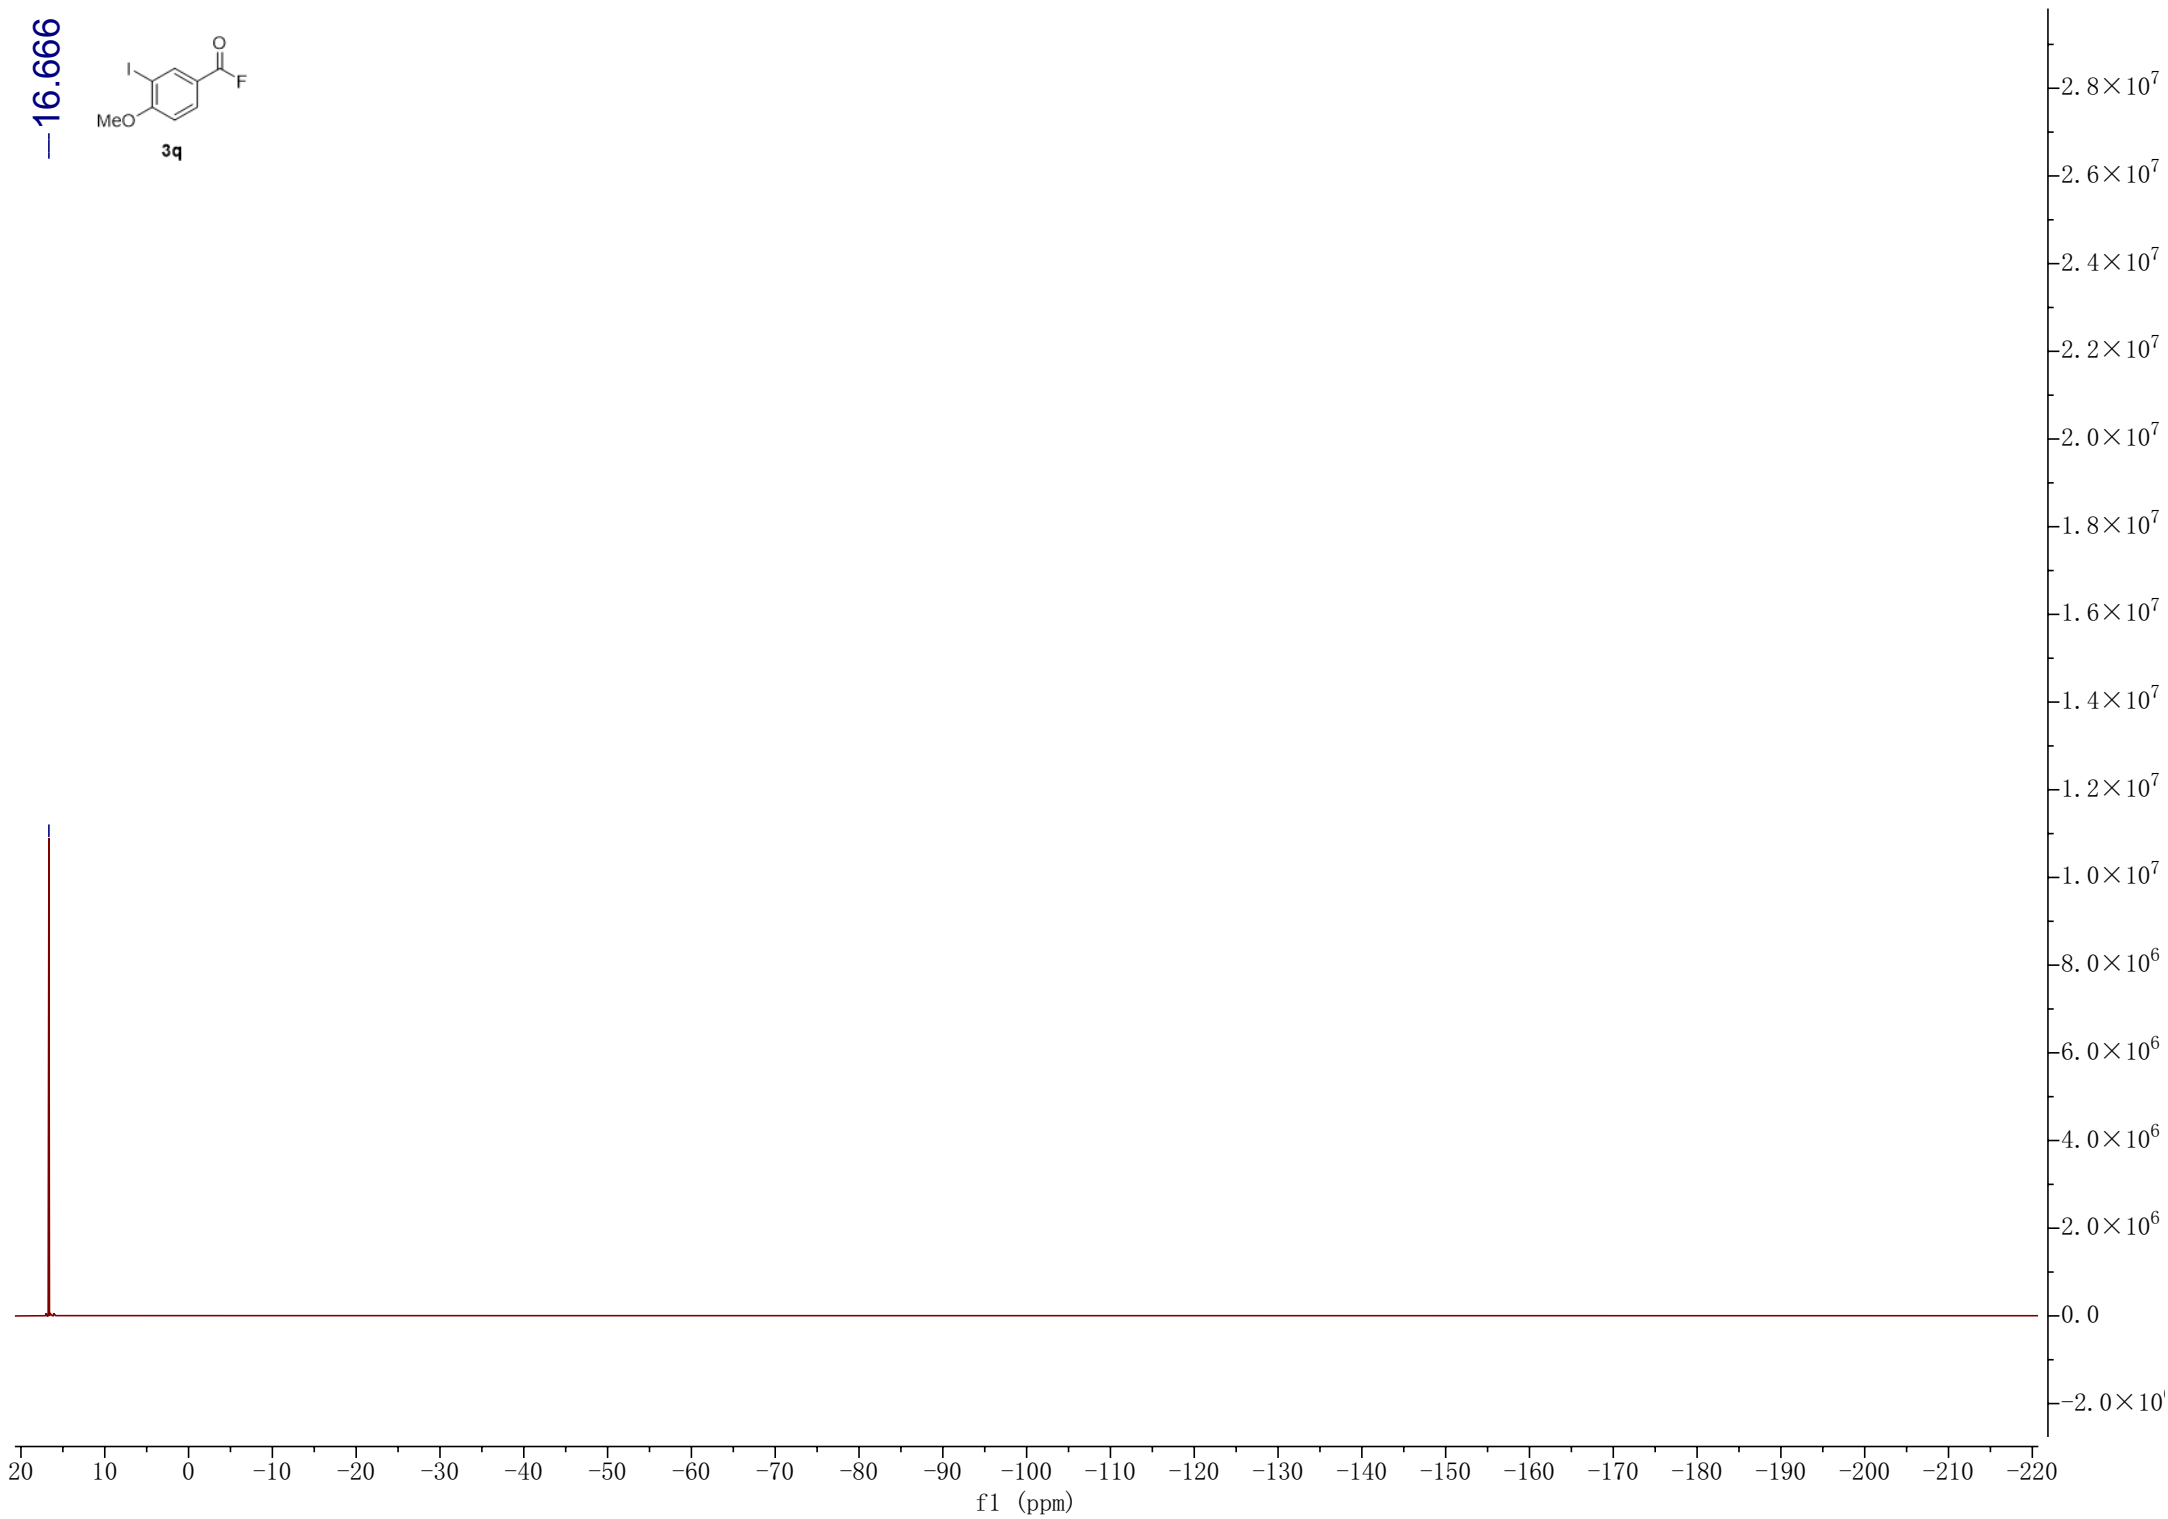

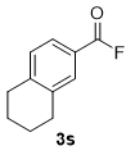

7.716  
7.708  
7.701  
7.693  
7.687  
7.260  
7.177  
7.164

2.841  
2.832  
2.822  
2.813  
2.804  
2.795  
1.837  
1.832  
1.826  
1.820  
1.814

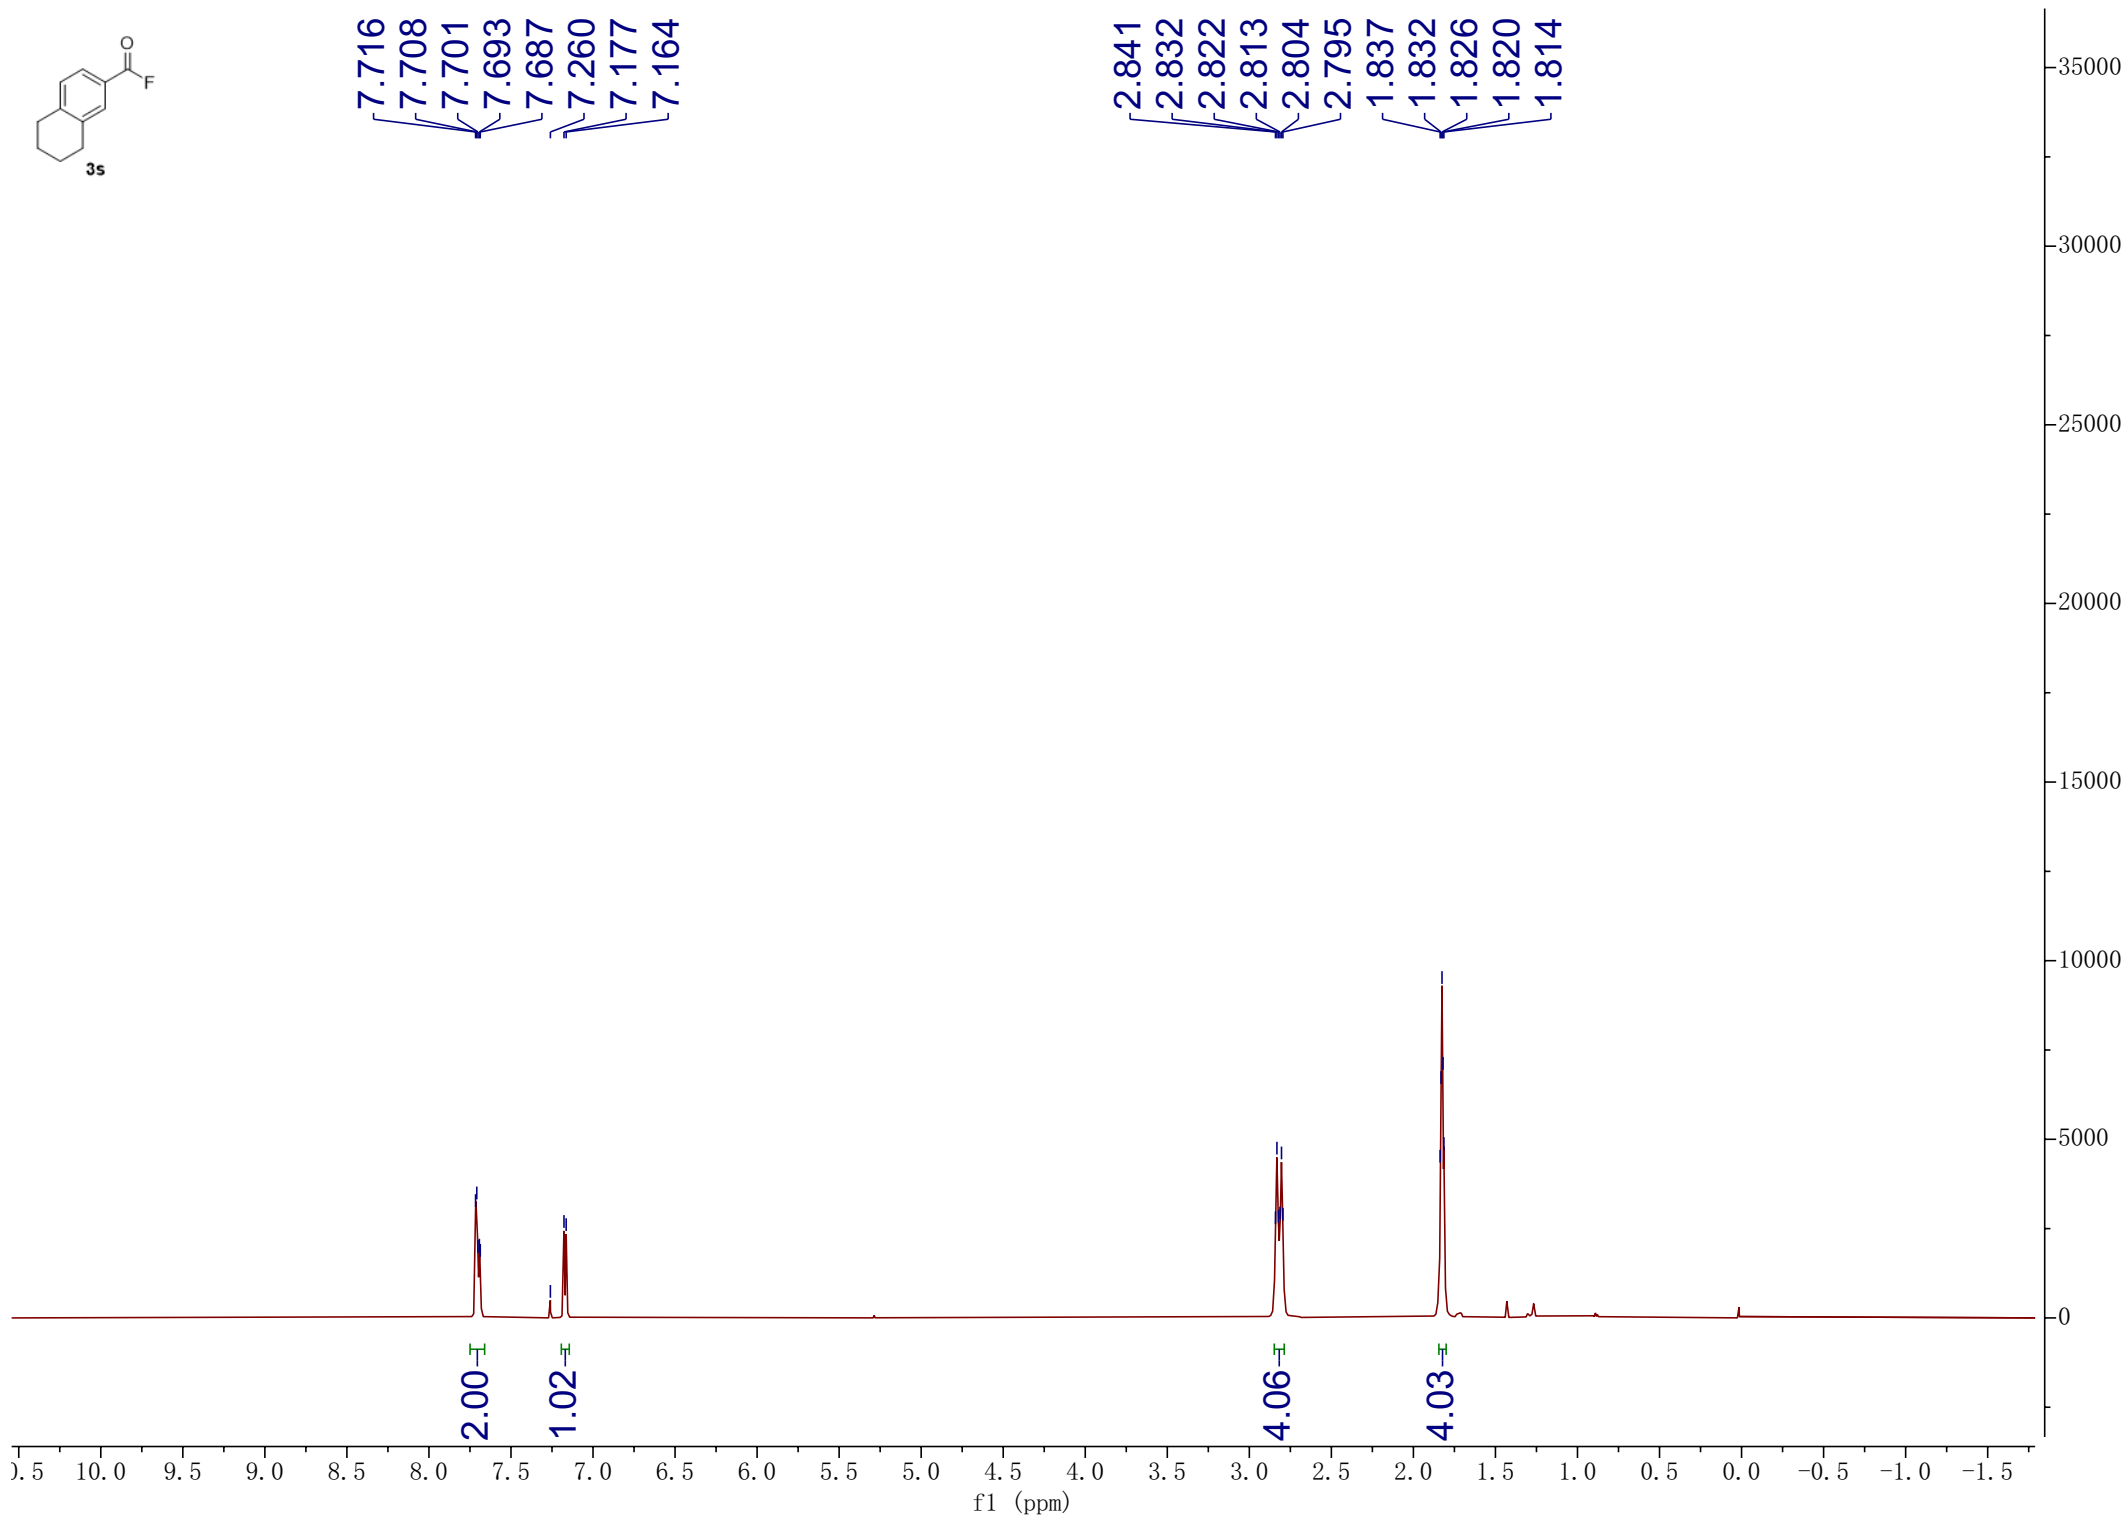

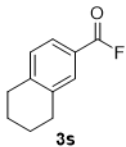

158.92  
156.65  
146.01  
138.31  
132.36  
132.33  
129.94  
128.32  
128.29  
122.17  
121.77

77.44  
77.23  
77.02

29.91  
29.26  
22.80  
22.68

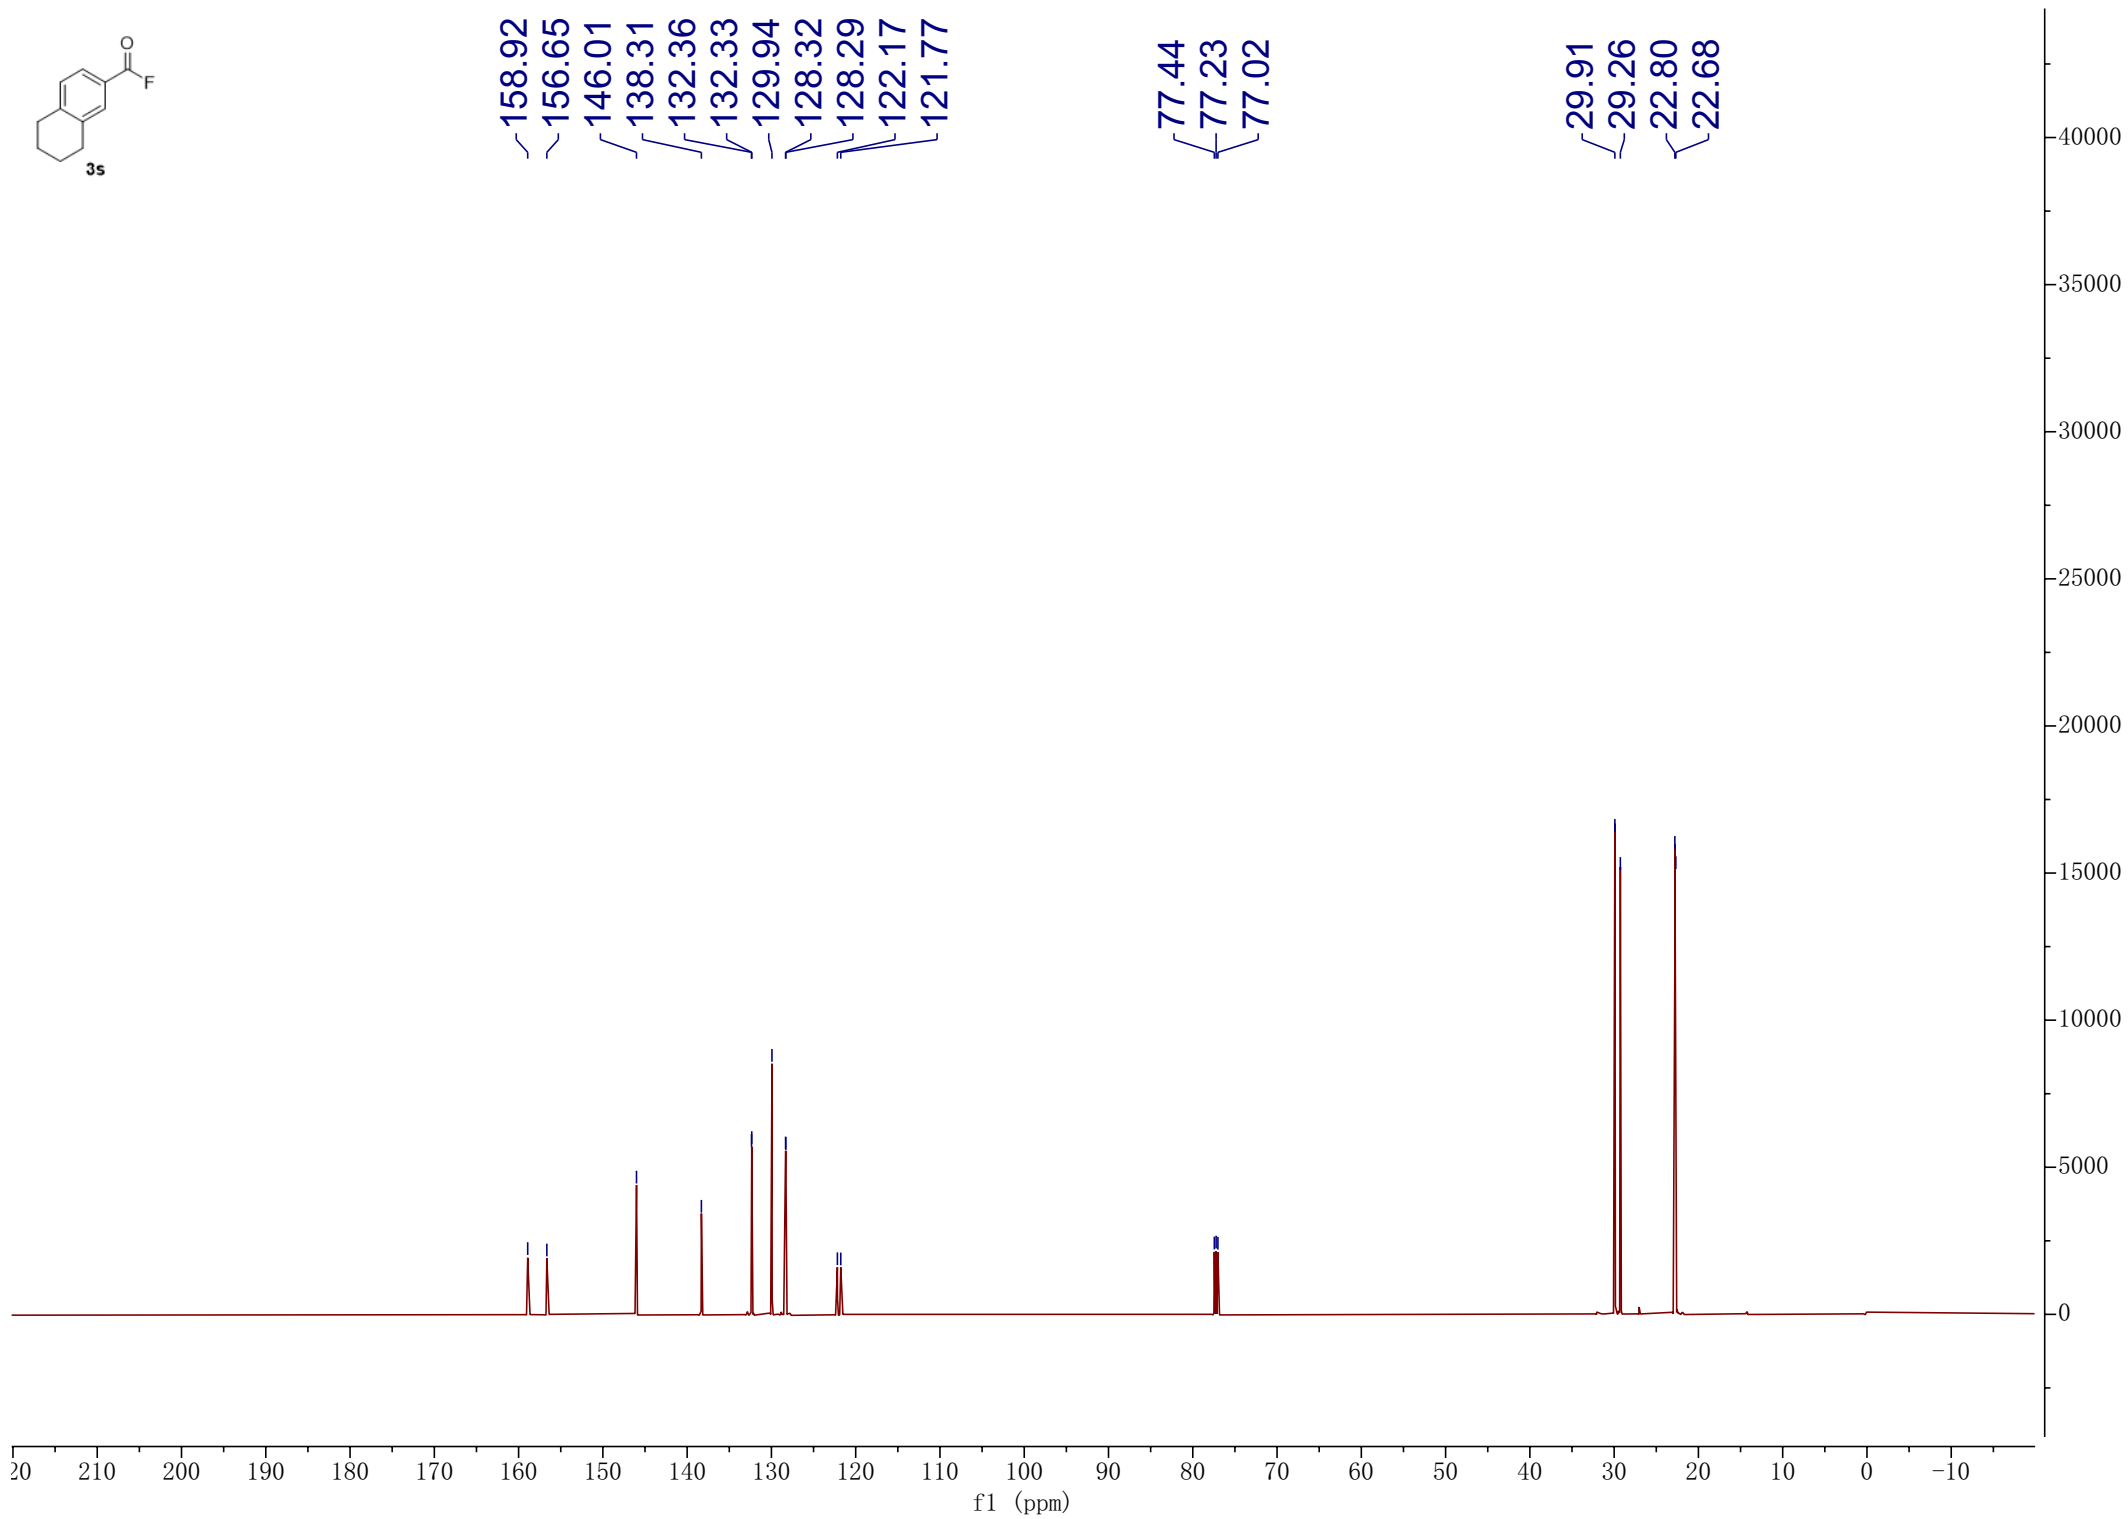

—17.32

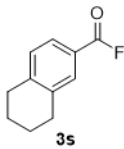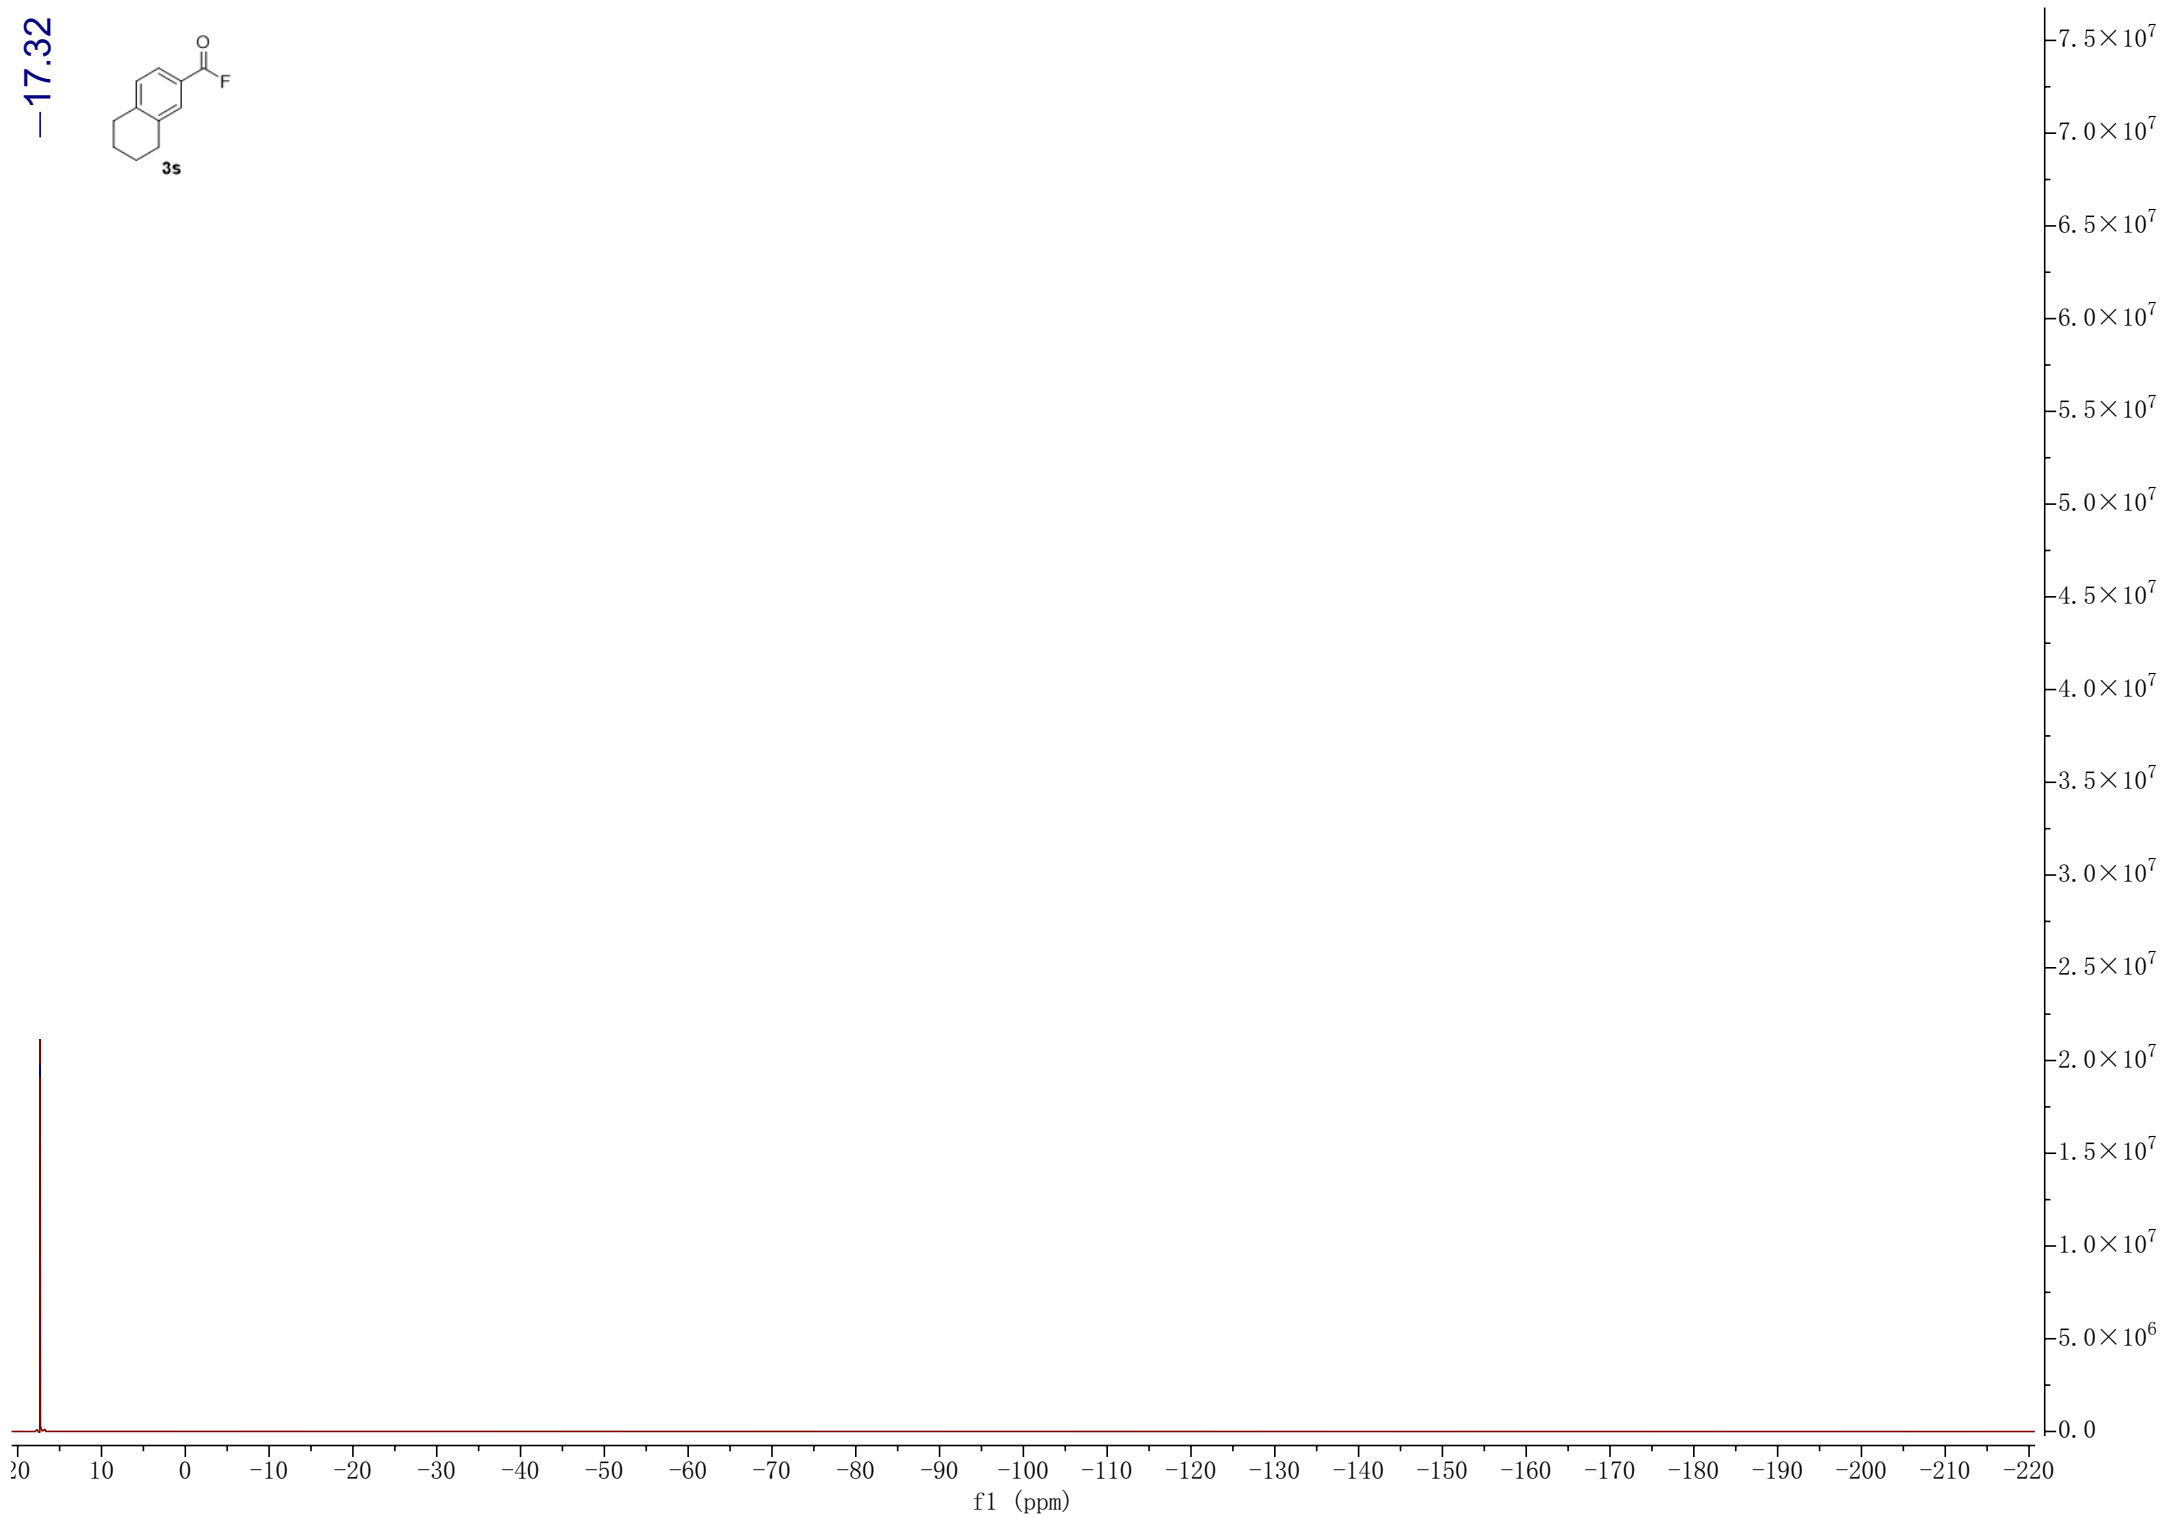



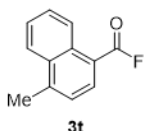

9.078  
9.064  
8.260  
8.256  
8.248  
8.244  
8.231  
8.115  
8.101  
7.727  
7.715  
7.713  
7.701  
7.655  
7.644  
7.641  
7.630  
7.416  
7.404  
7.260

2.795

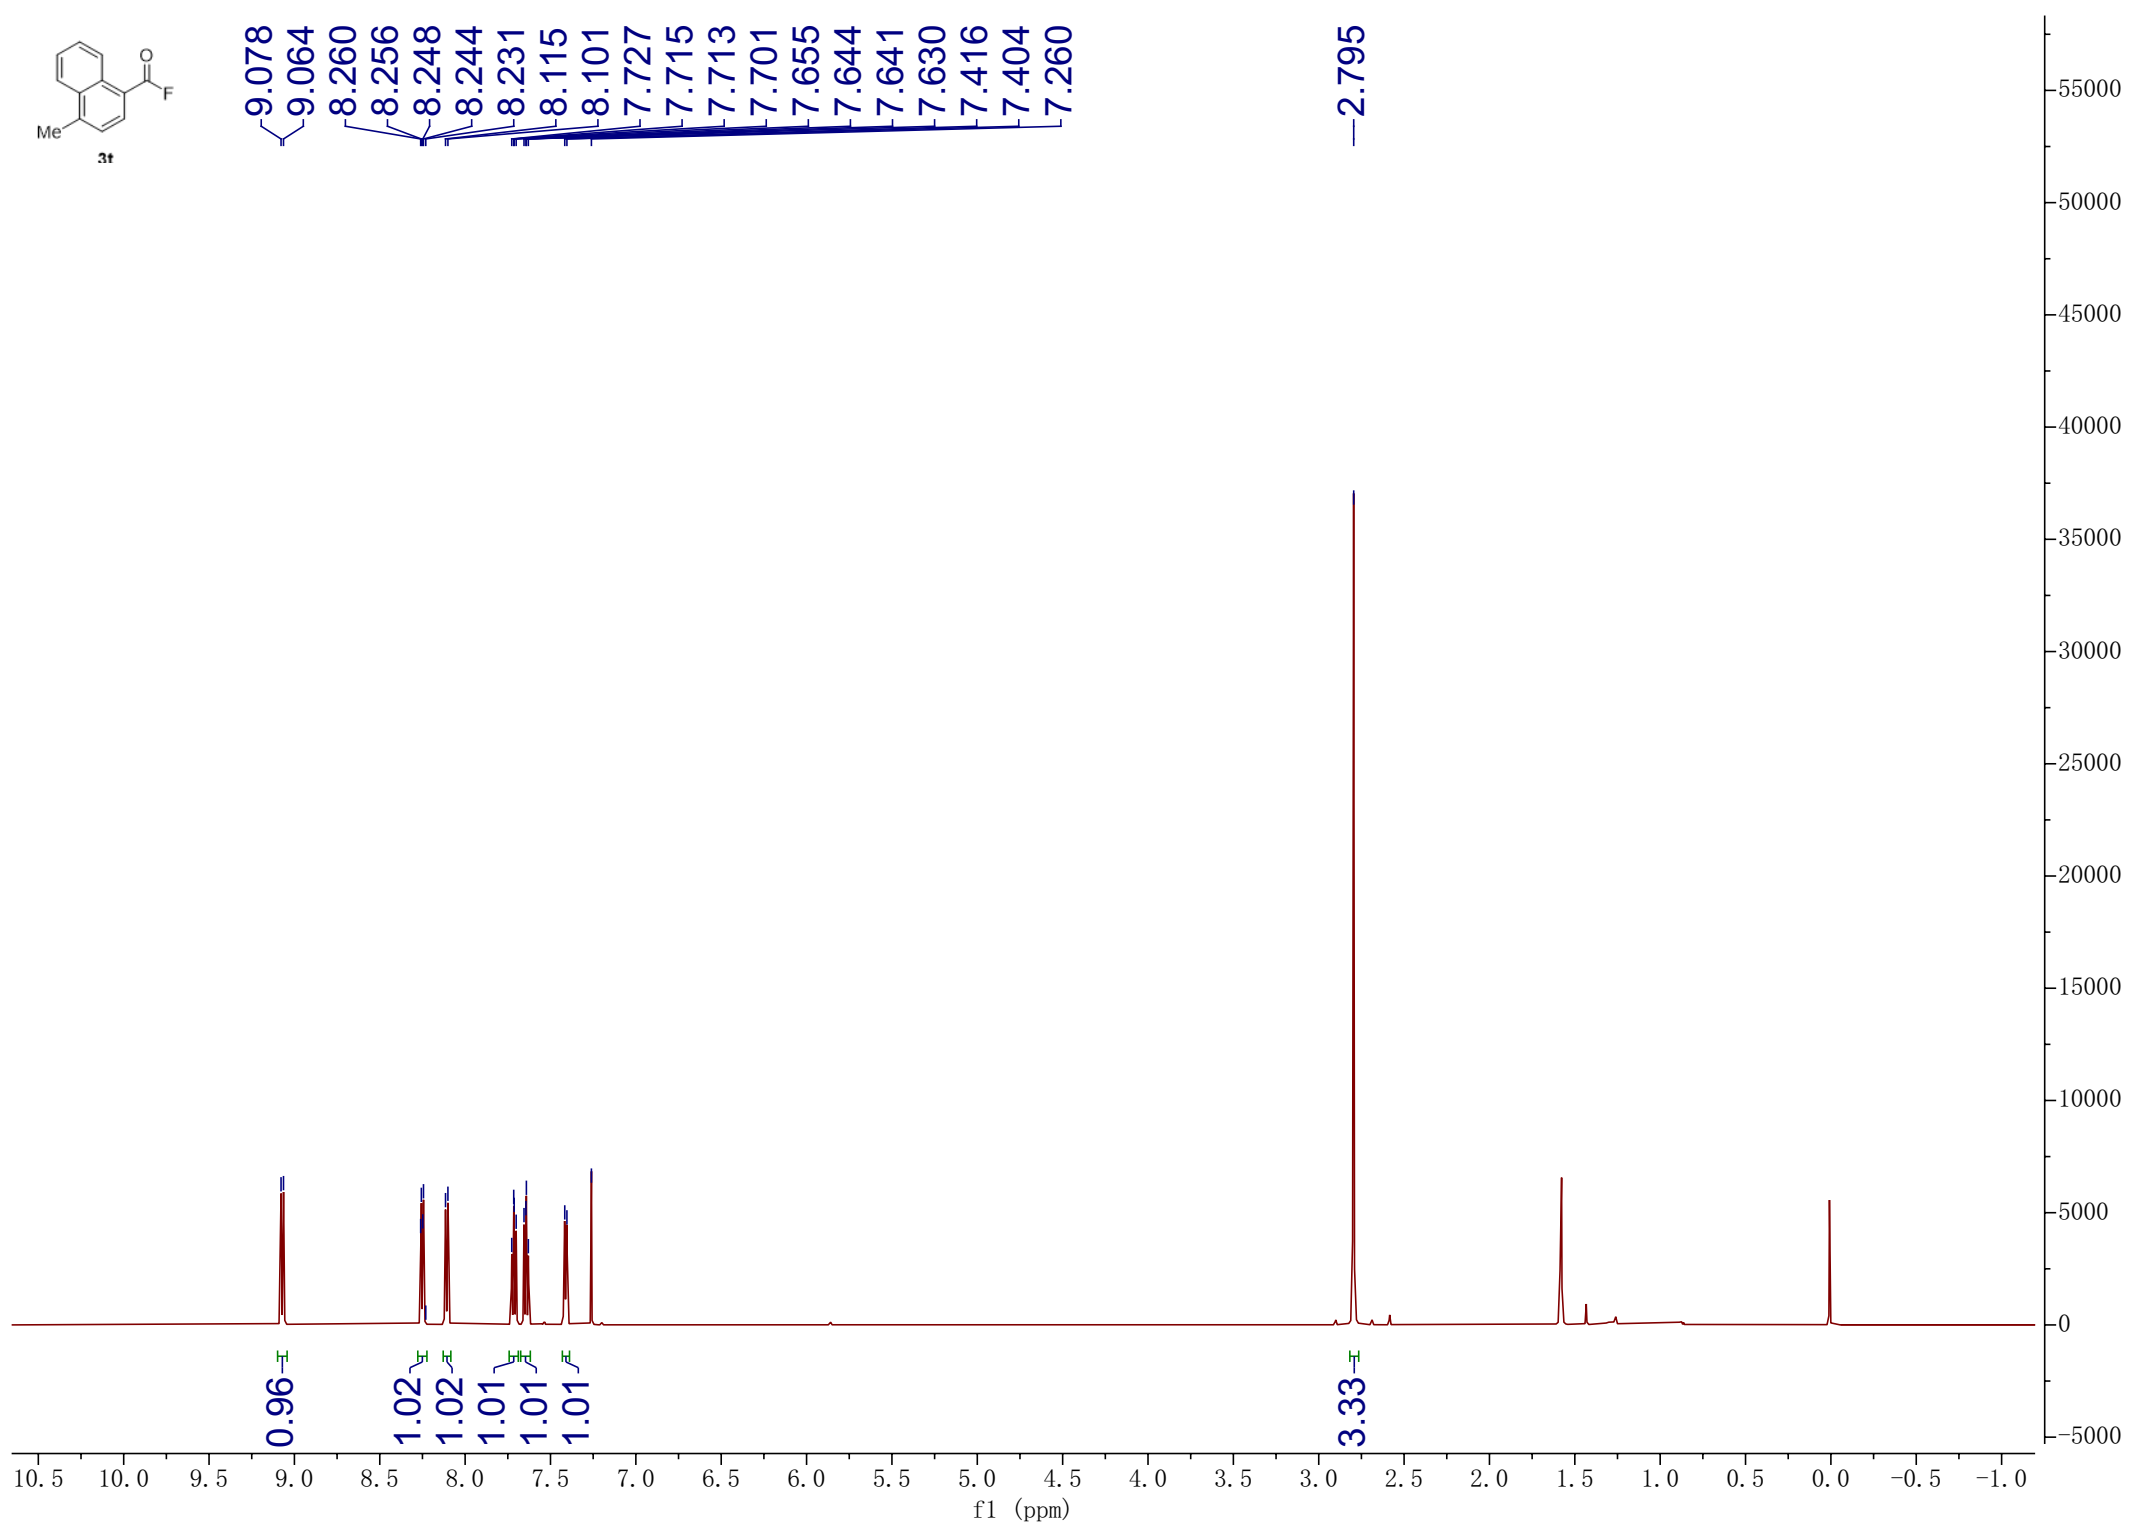

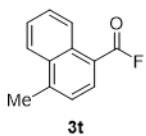

157.86  
155.59  
144.61  
133.81  
133.79  
133.19  
133.17  
132.38  
132.33  
128.94  
126.99  
125.92  
125.86  
125.04  
118.96  
118.59  
77.44  
77.23  
77.02  
20.64

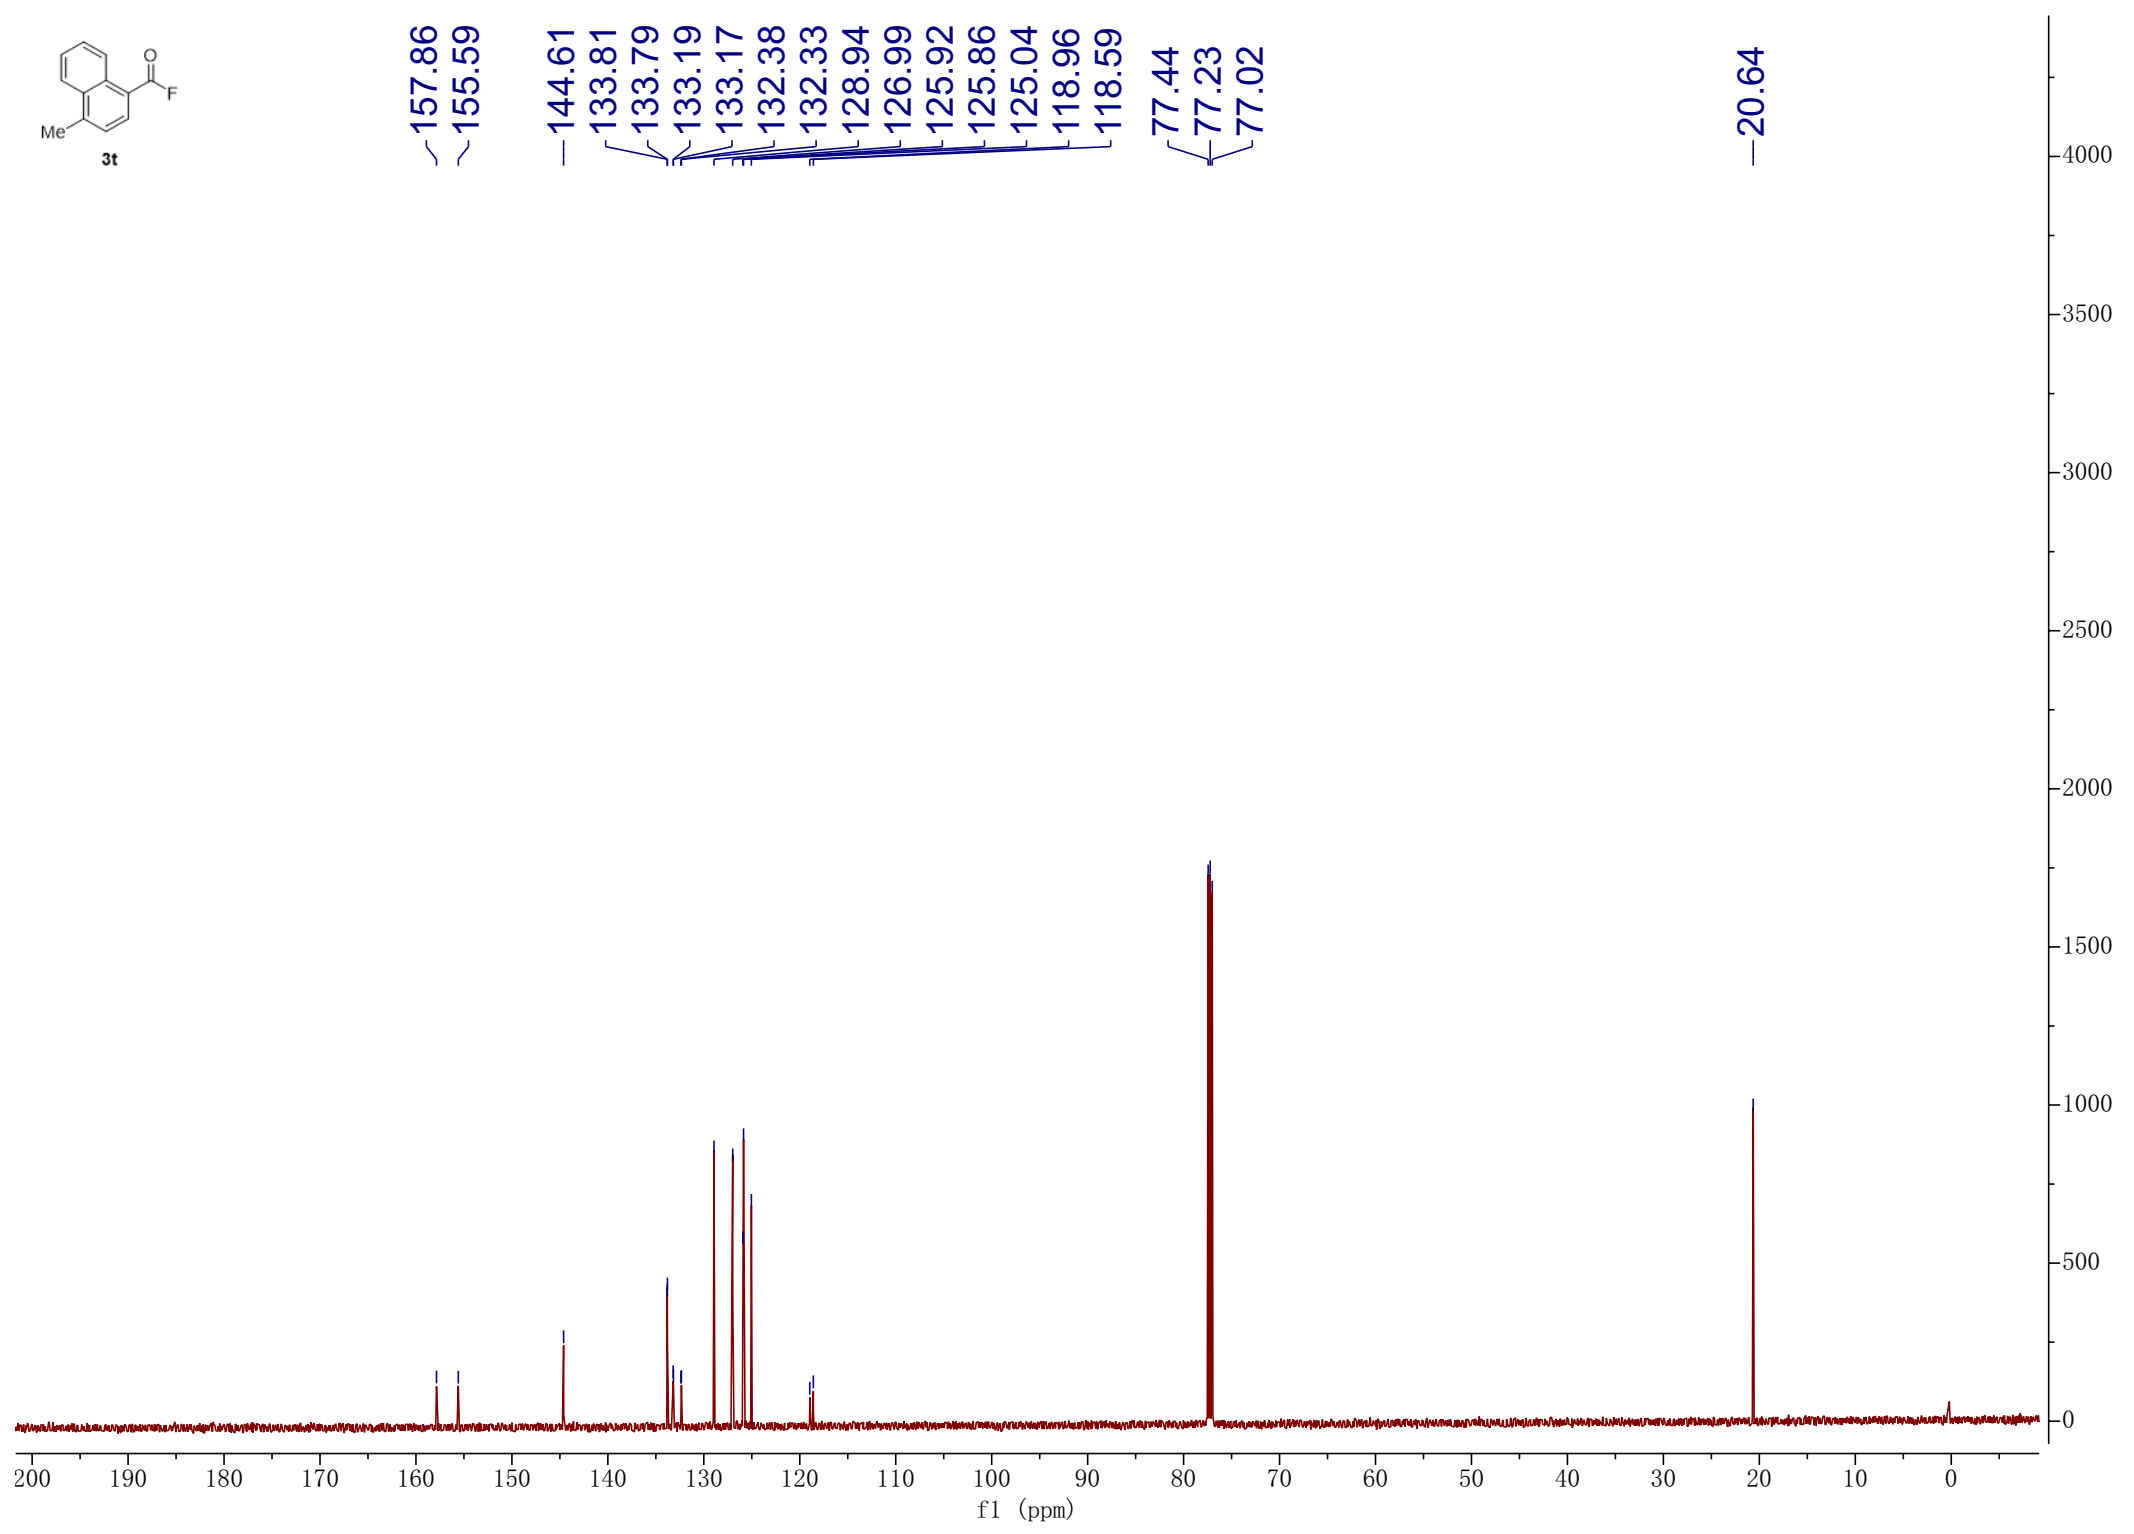

f1 (ppm)

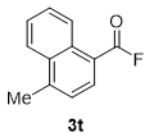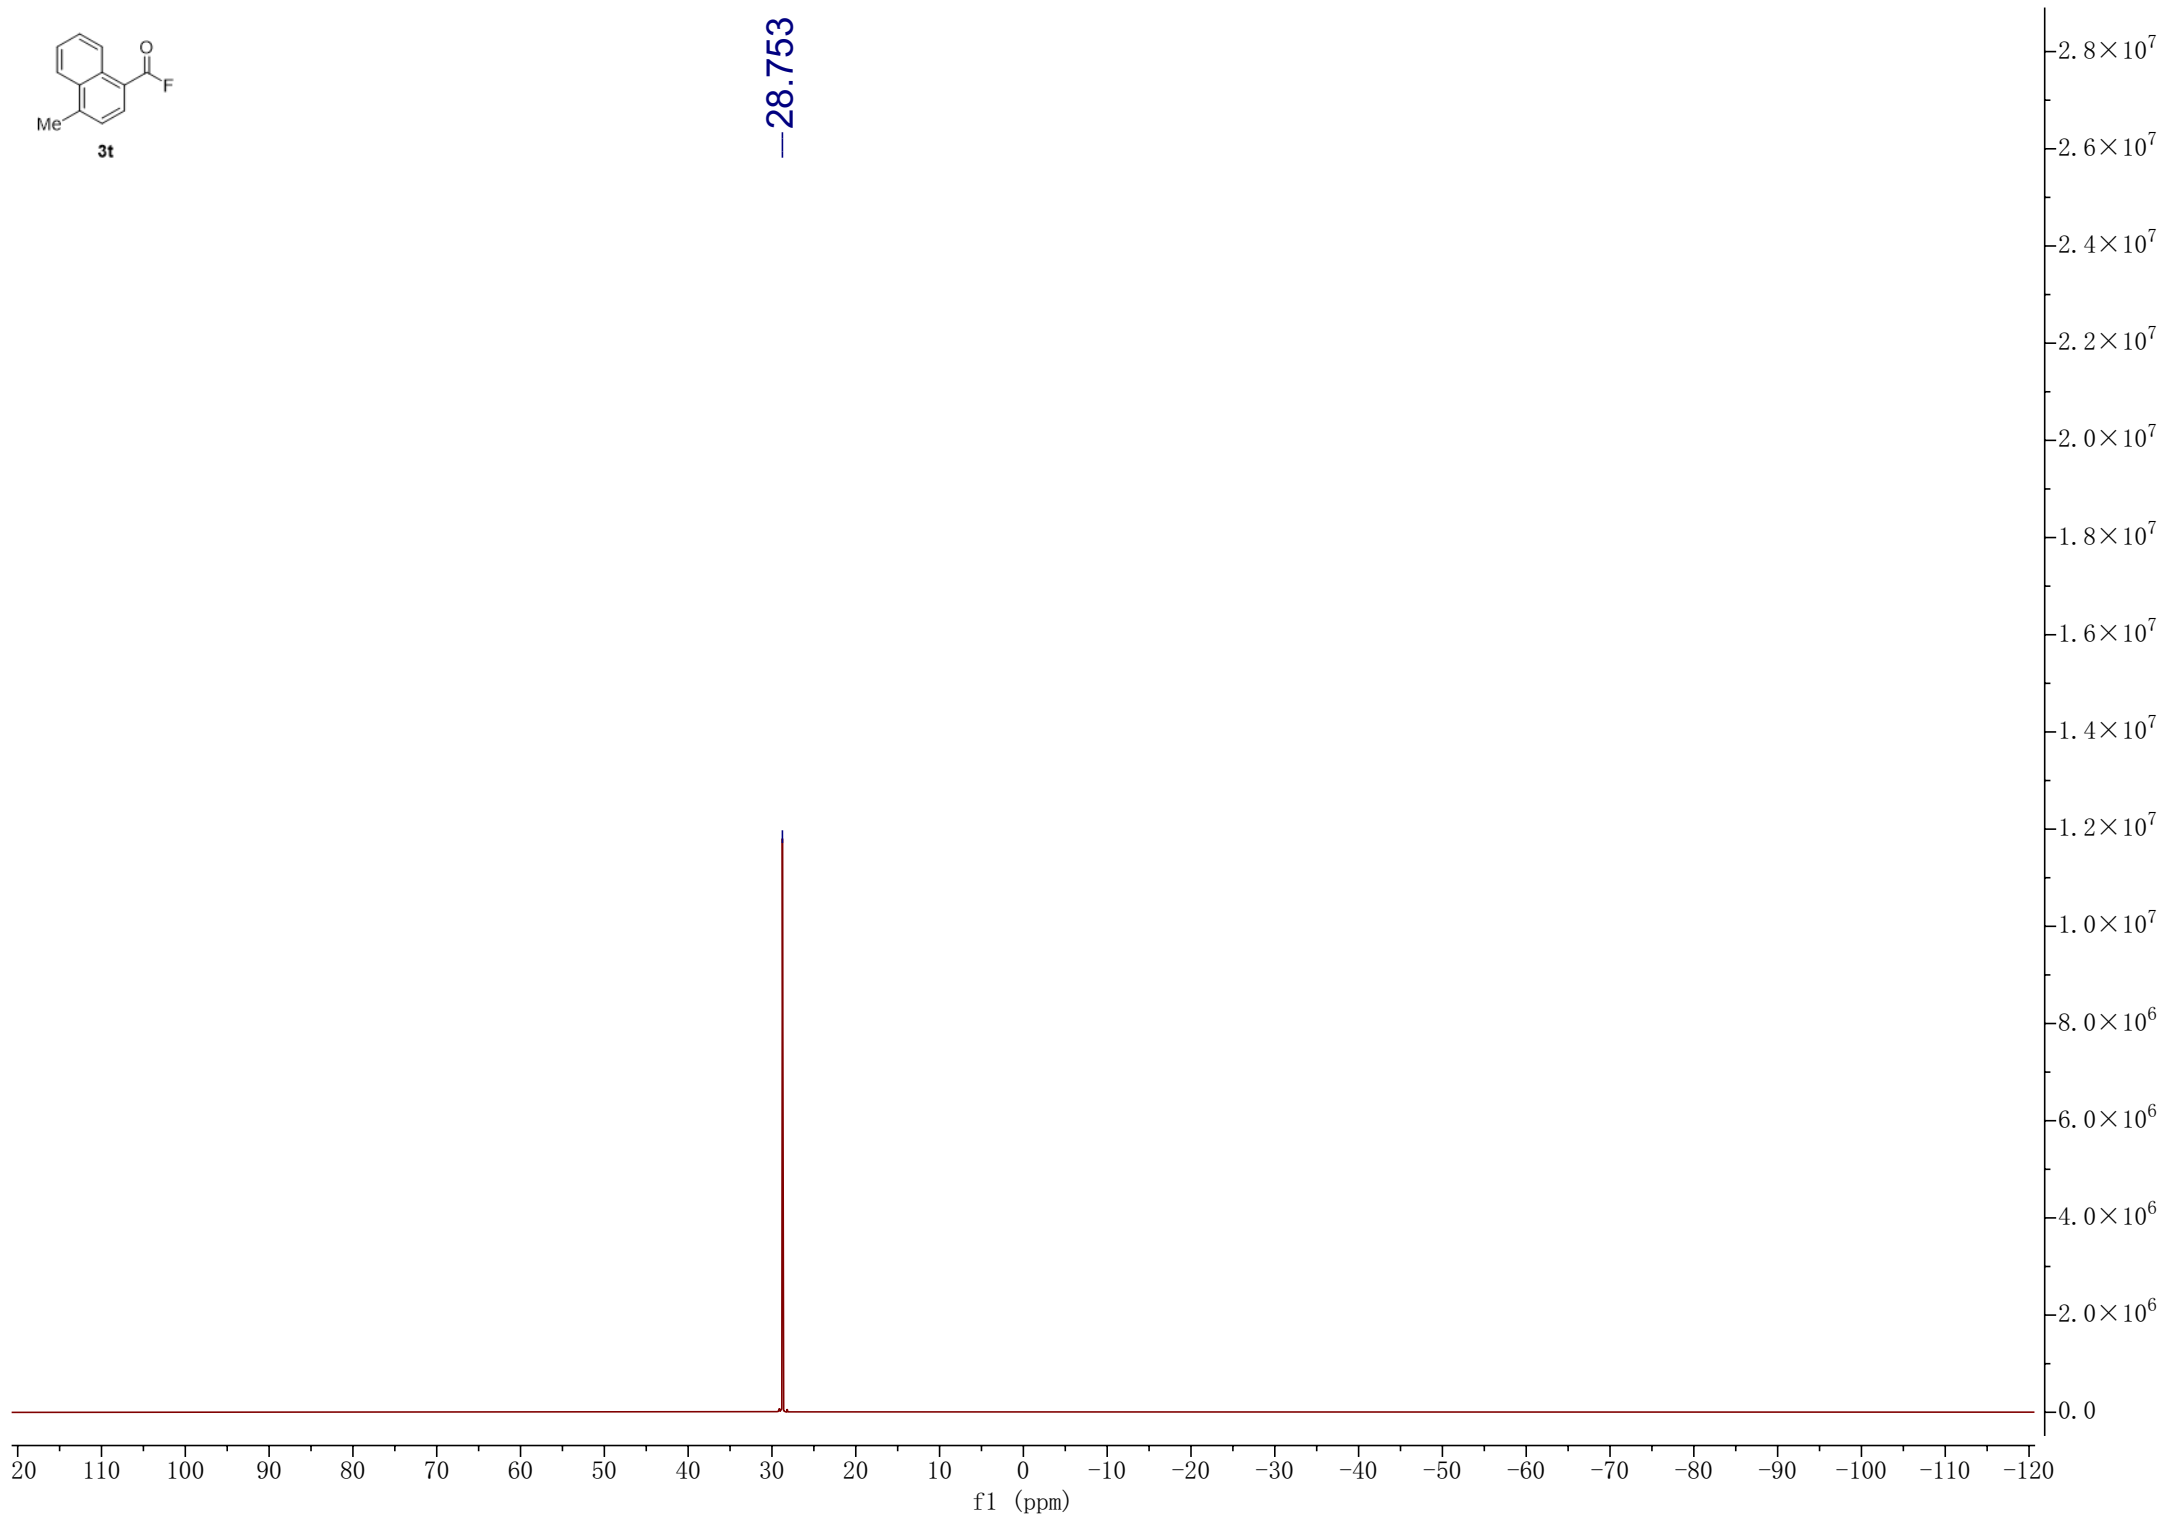

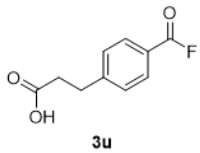

7.986  
7.972

7.380  
7.367  
7.260

3.066  
3.053  
3.041  
2.748  
2.735  
2.722

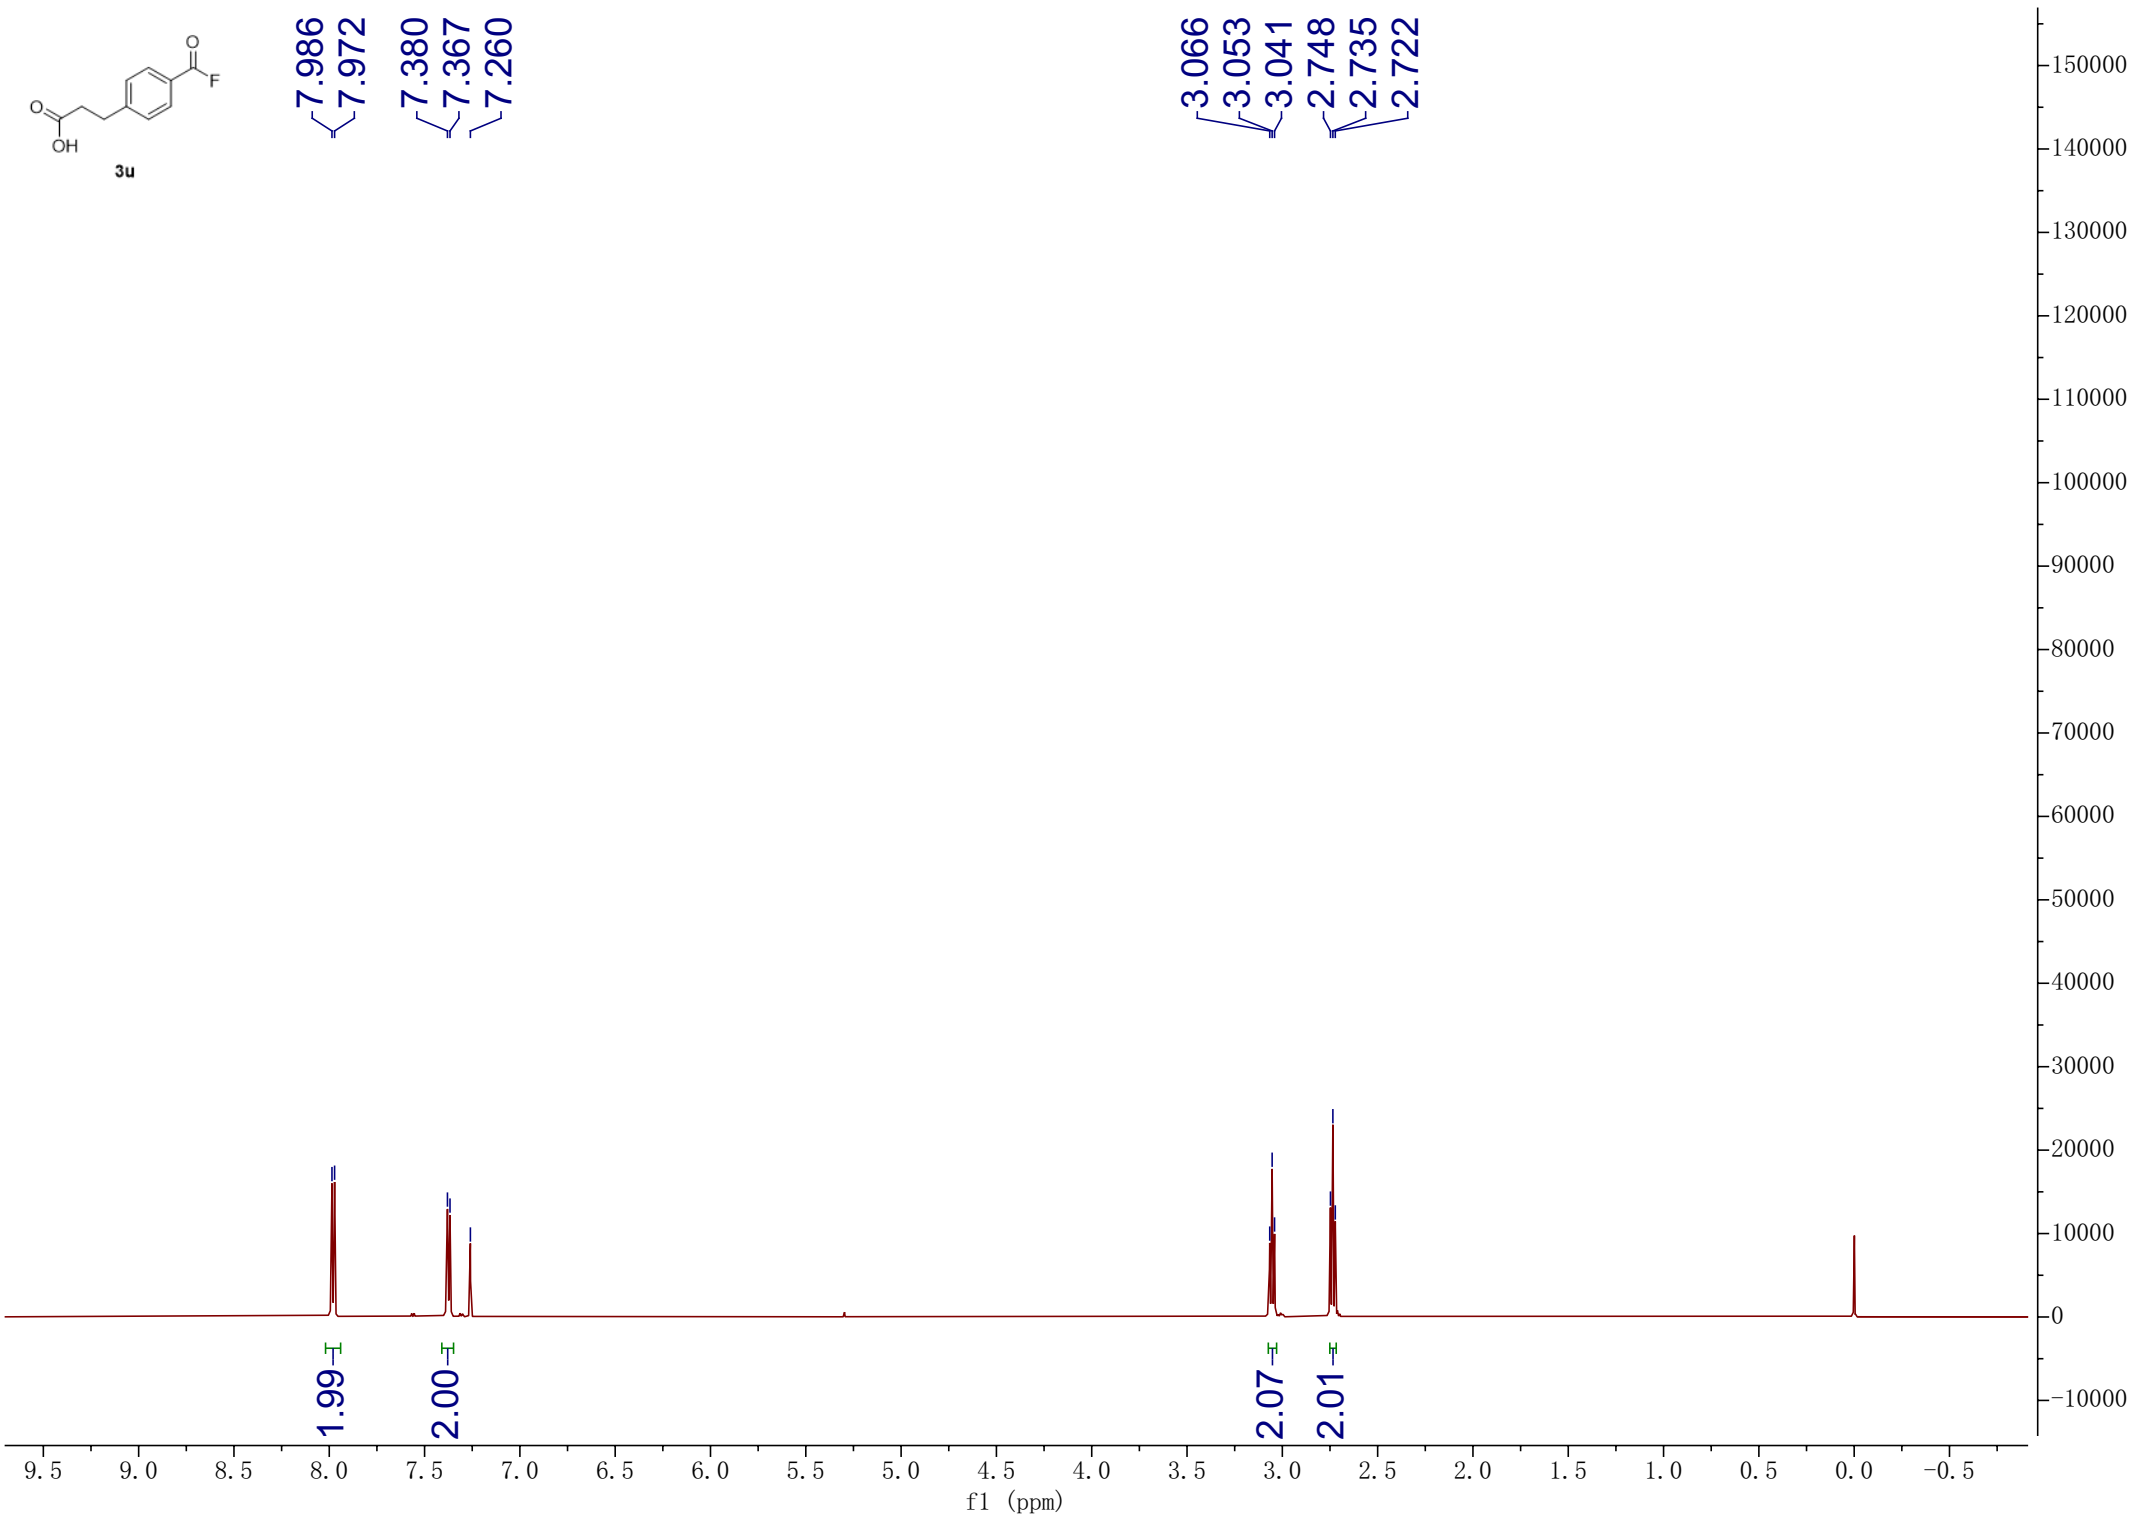

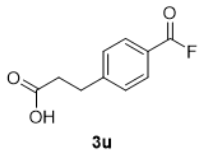

— 178.35

— 158.63

— 156.35

— 148.58

— 132.02

— 131.99

— 129.30

— 123.60

— 123.19

— 77.44

— 77.23

— 77.02

— 34.90

— 30.78

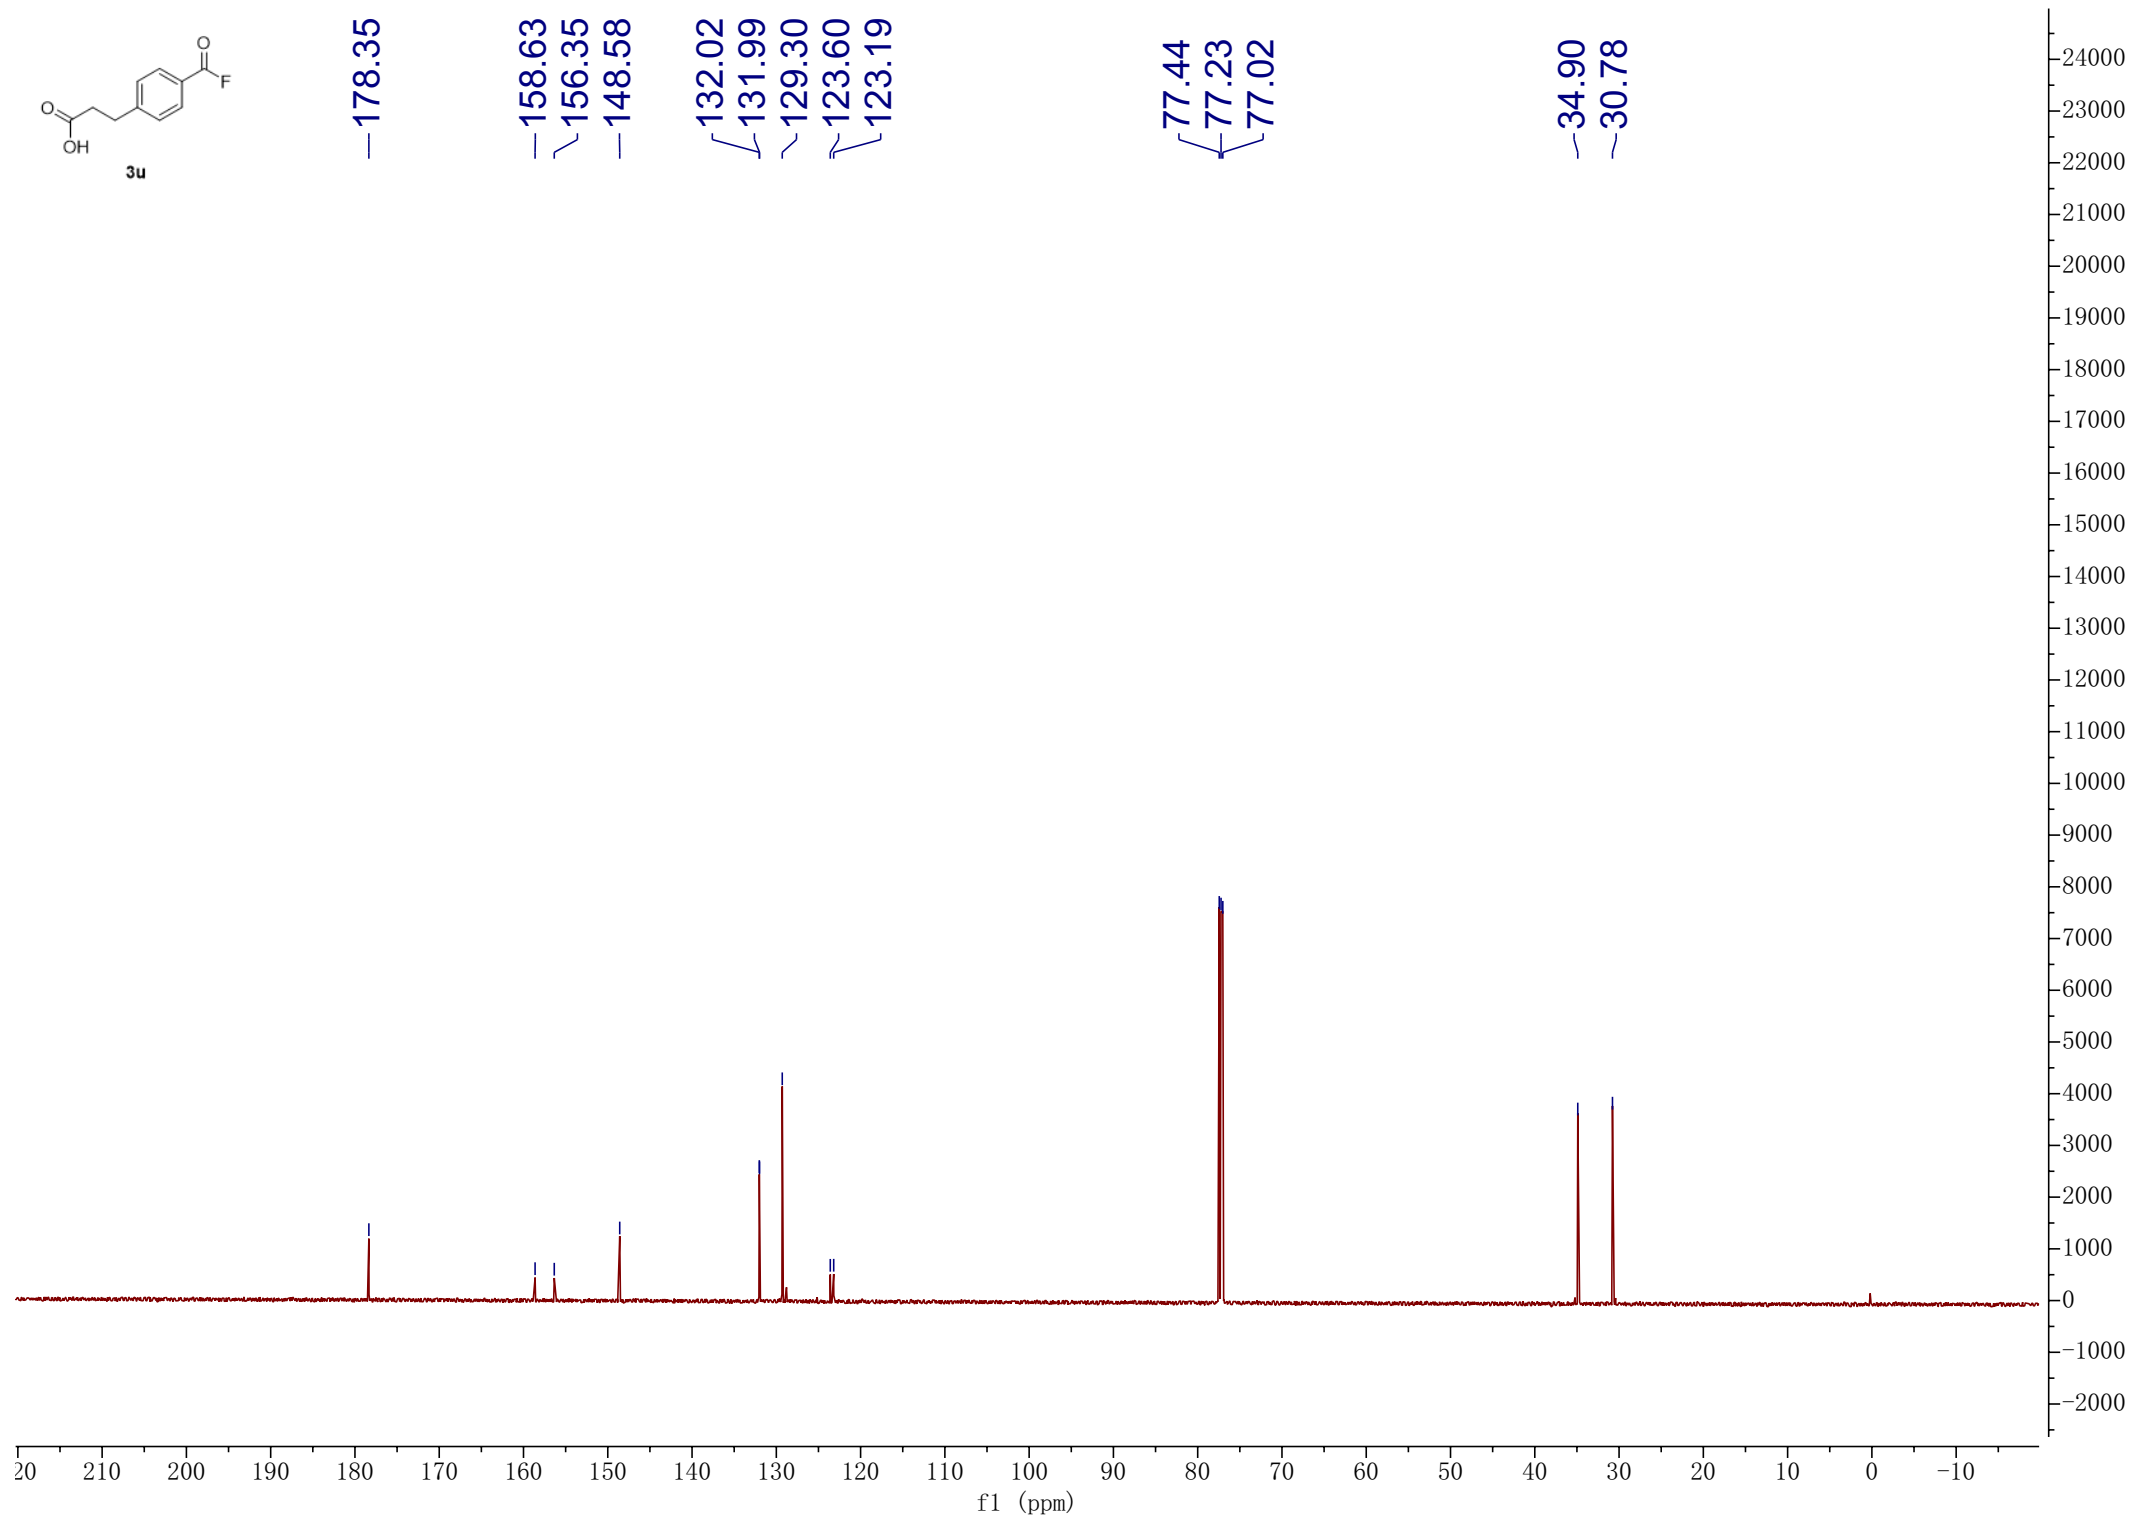



-17.933

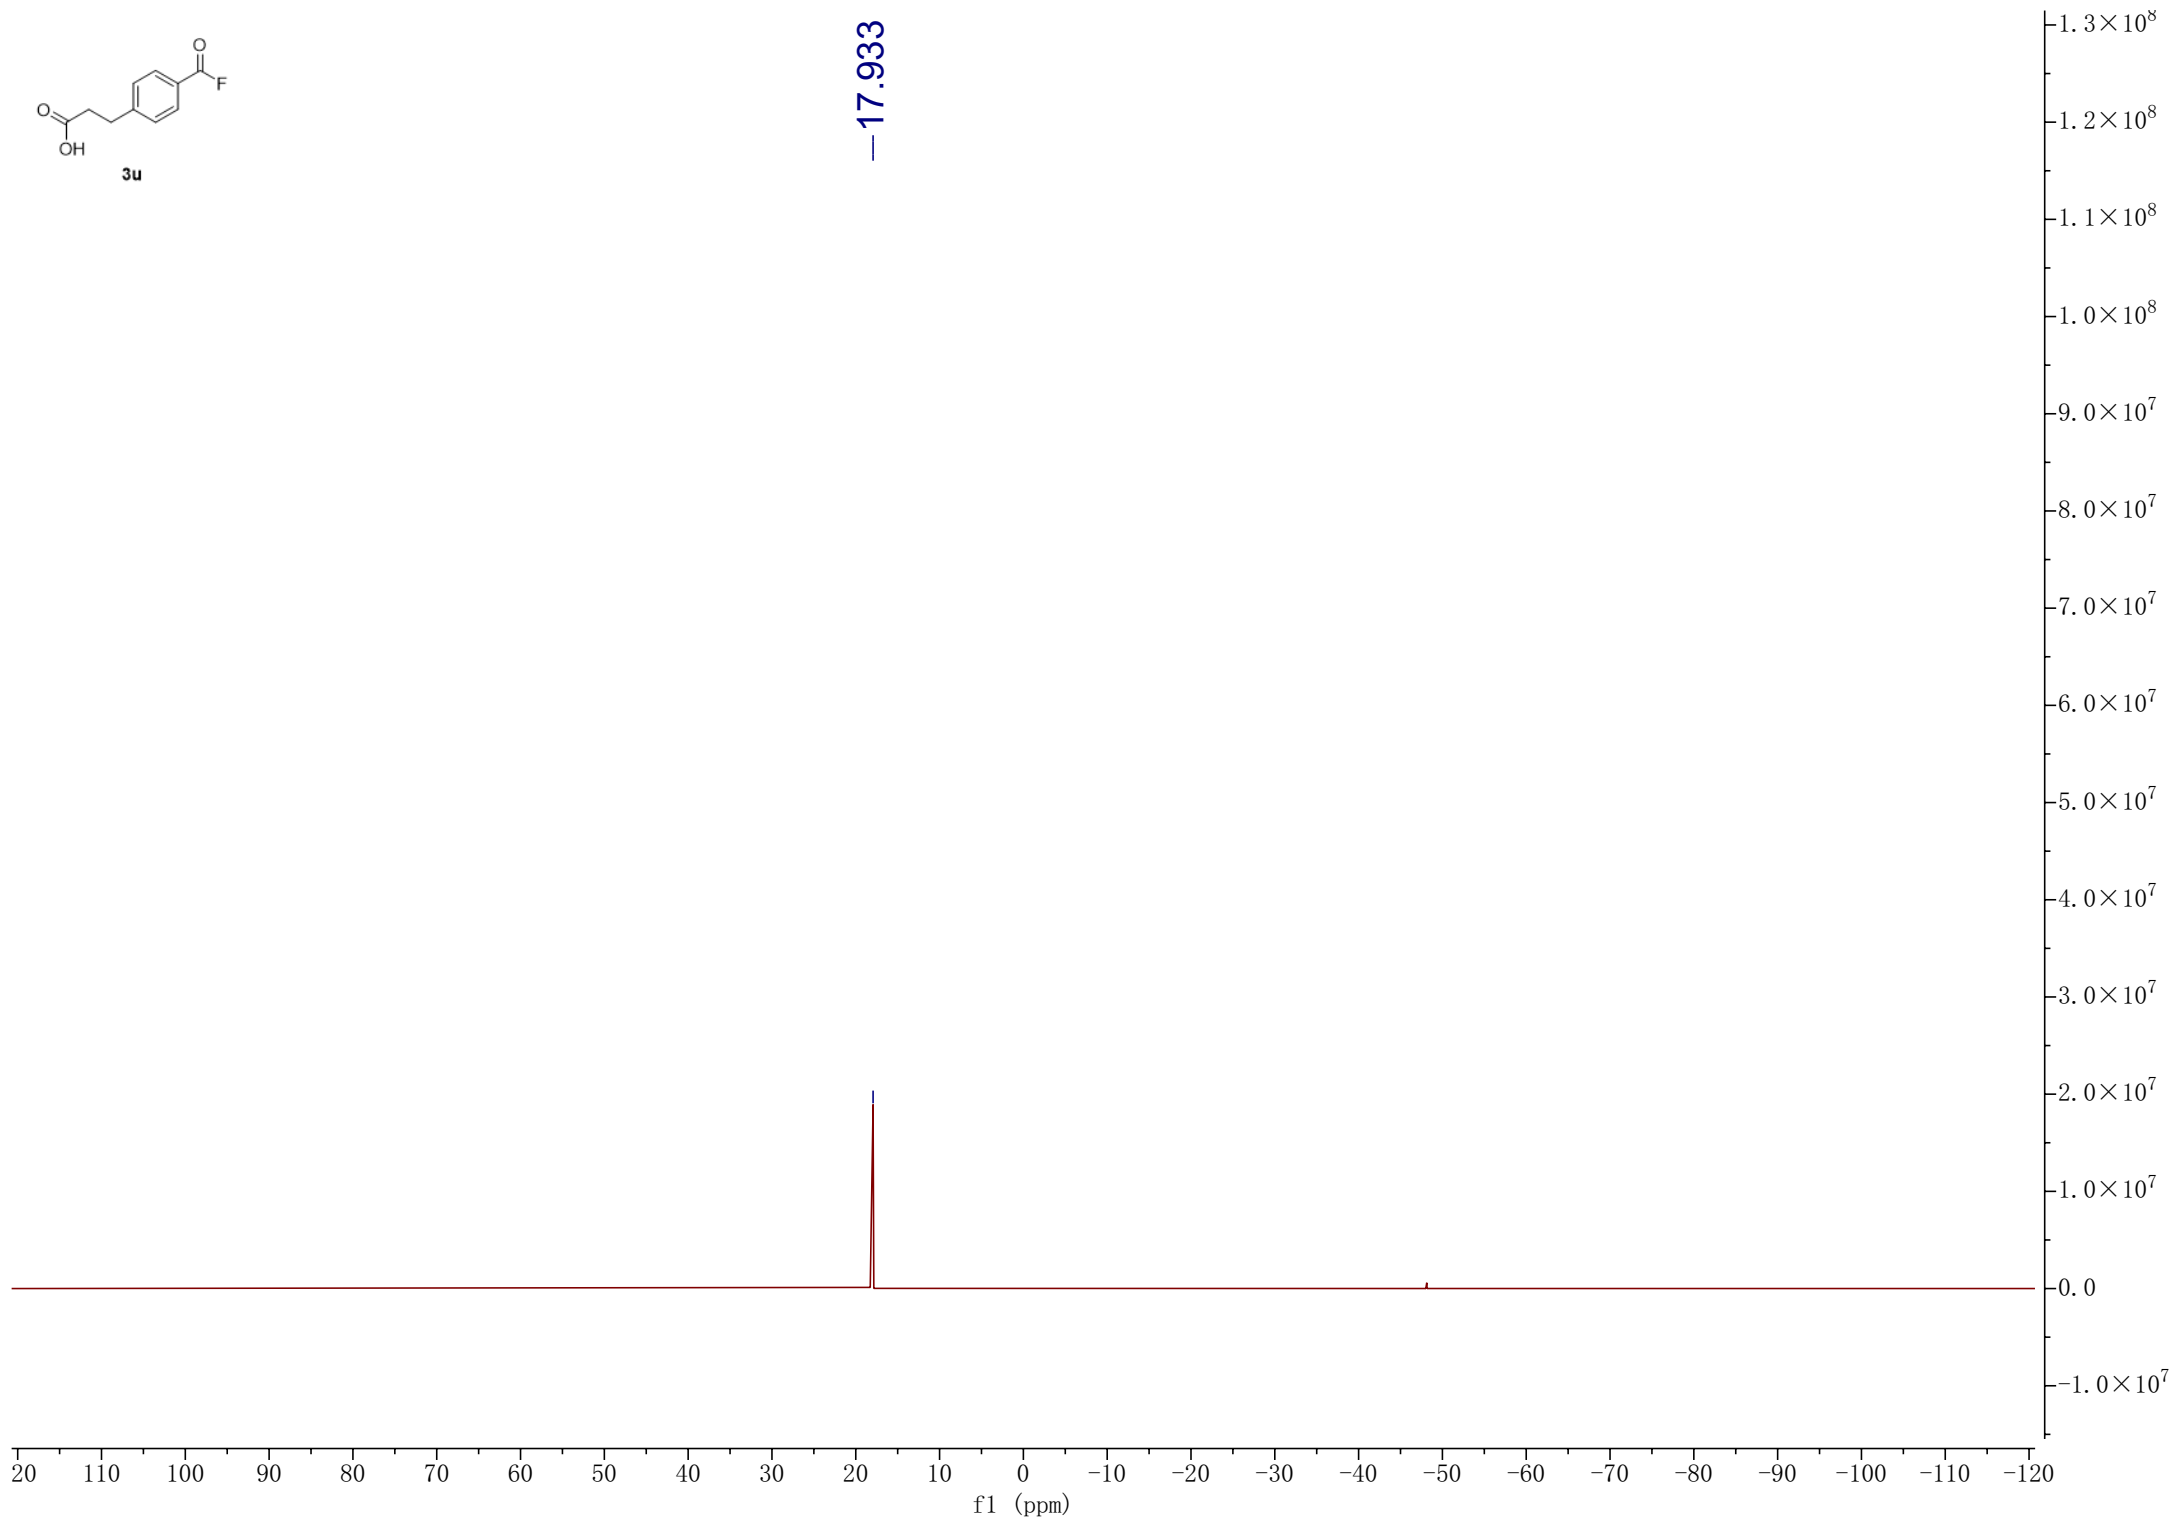

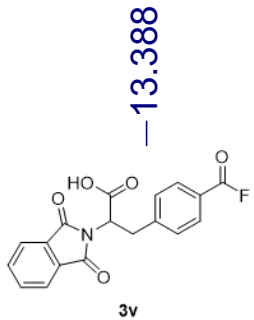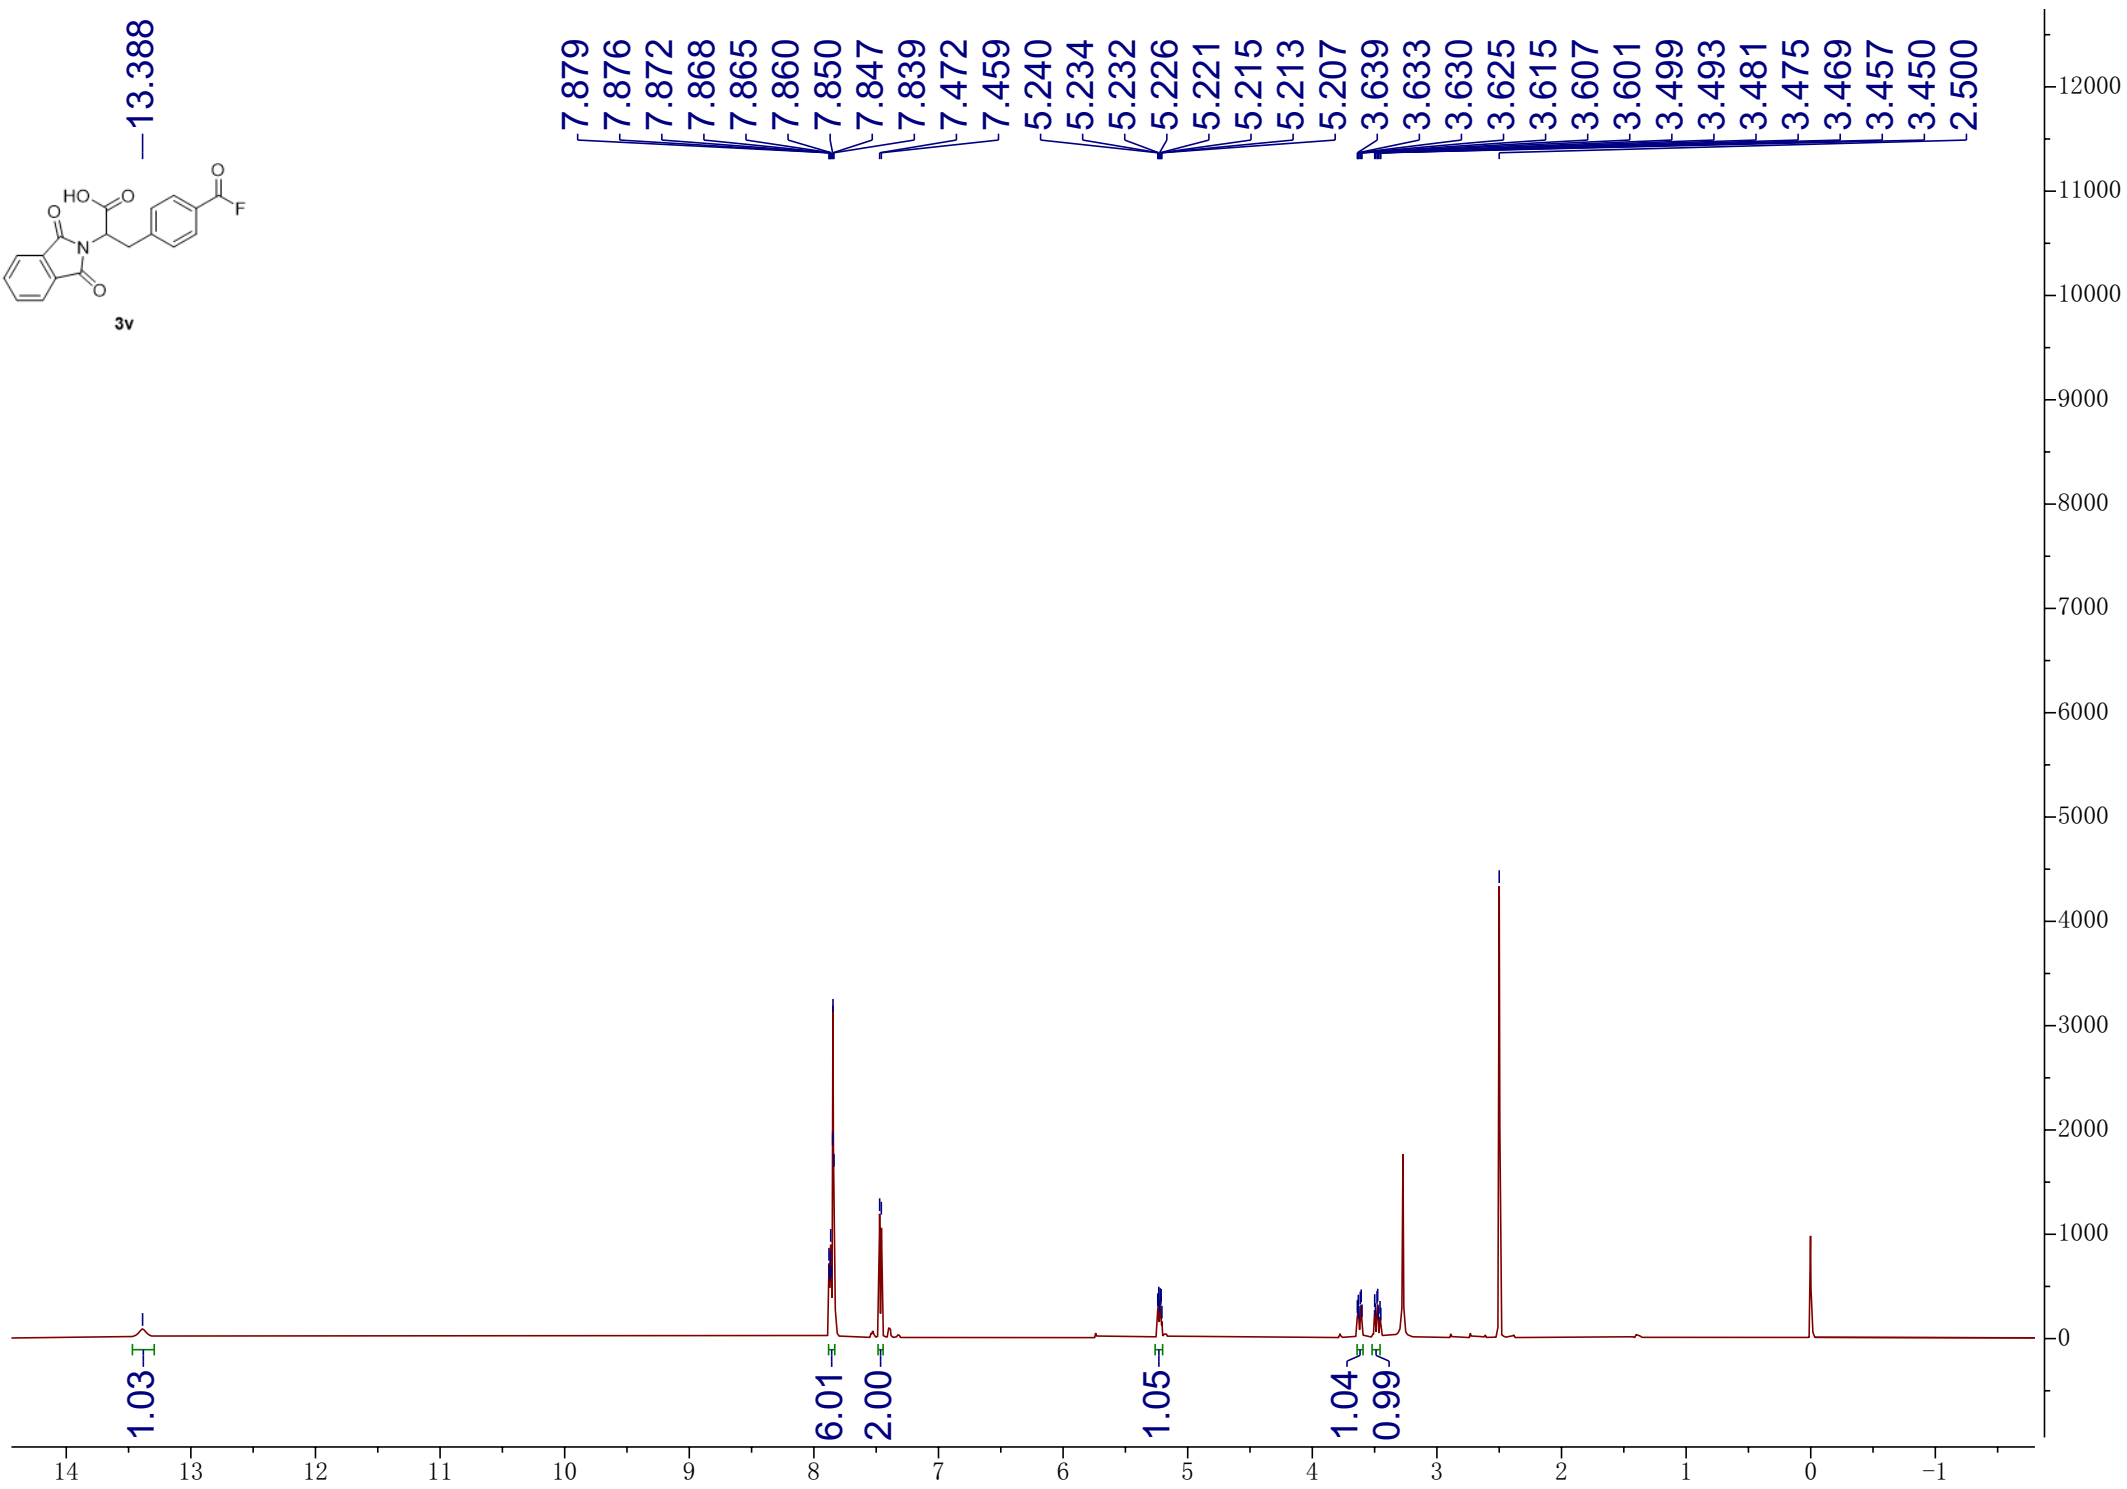

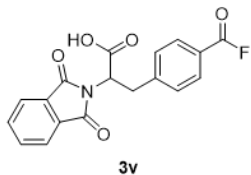

169.62  
167.01  
157.83  
155.56  
146.28  
134.92  
131.22  
130.63  
129.90  
123.40  
122.52  
122.12

52.31  
39.94  
39.80  
39.66  
39.52  
39.38  
39.24  
39.10  
34.18

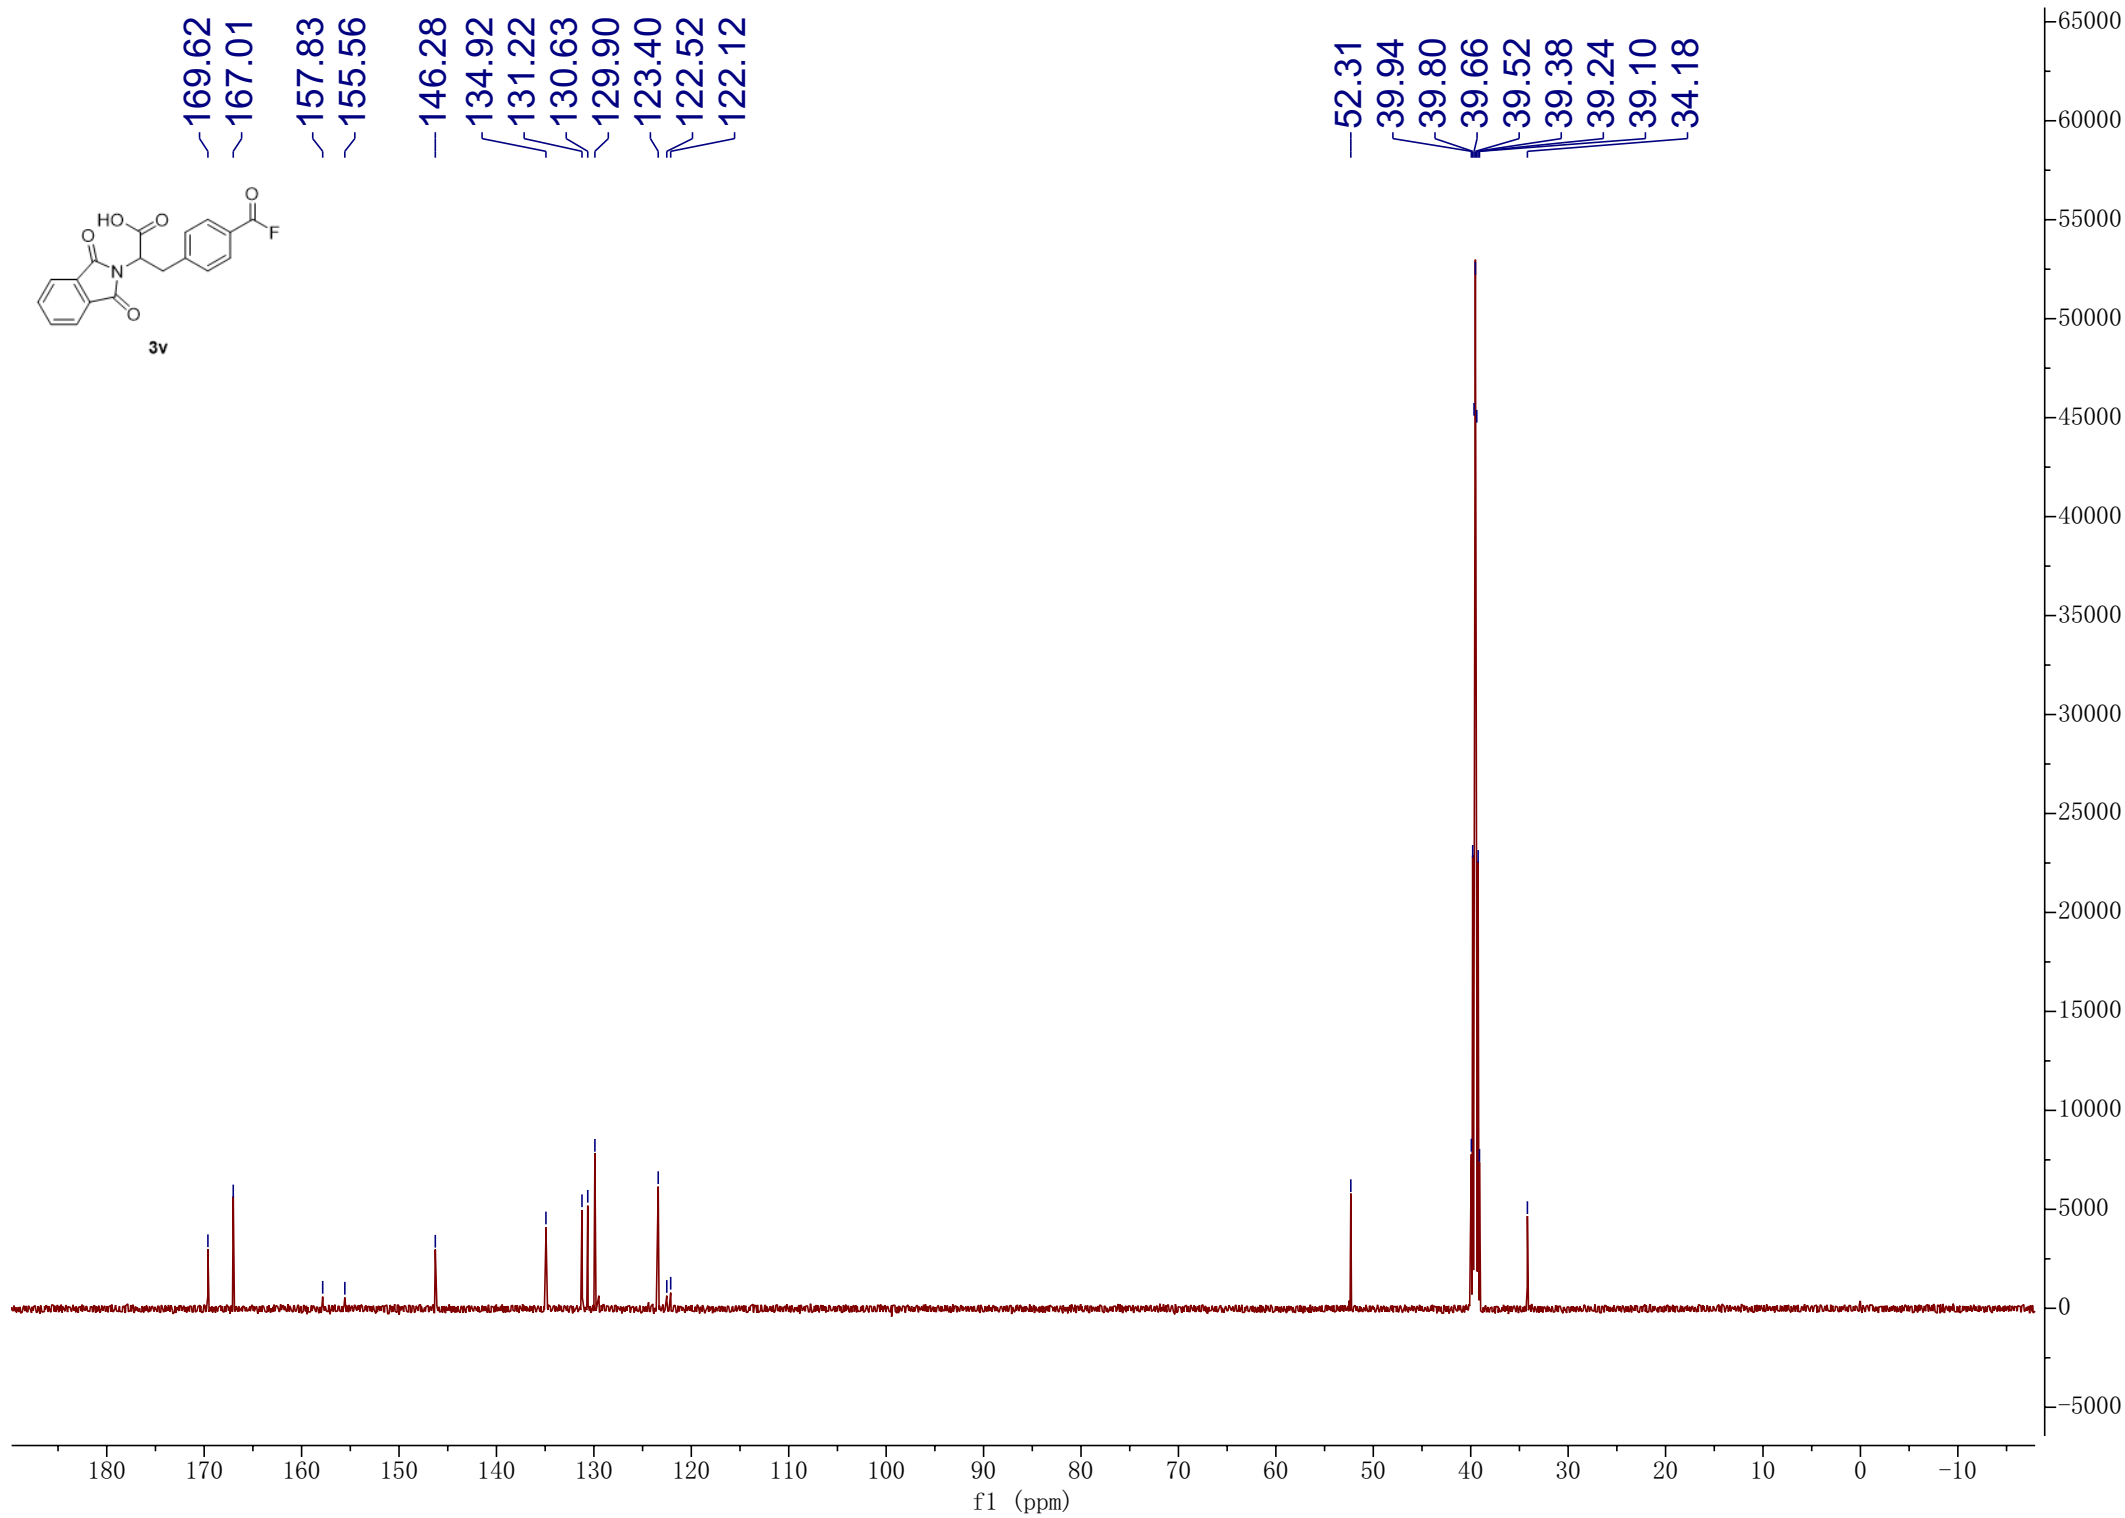



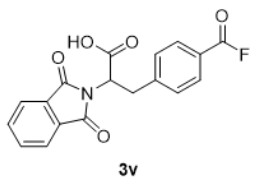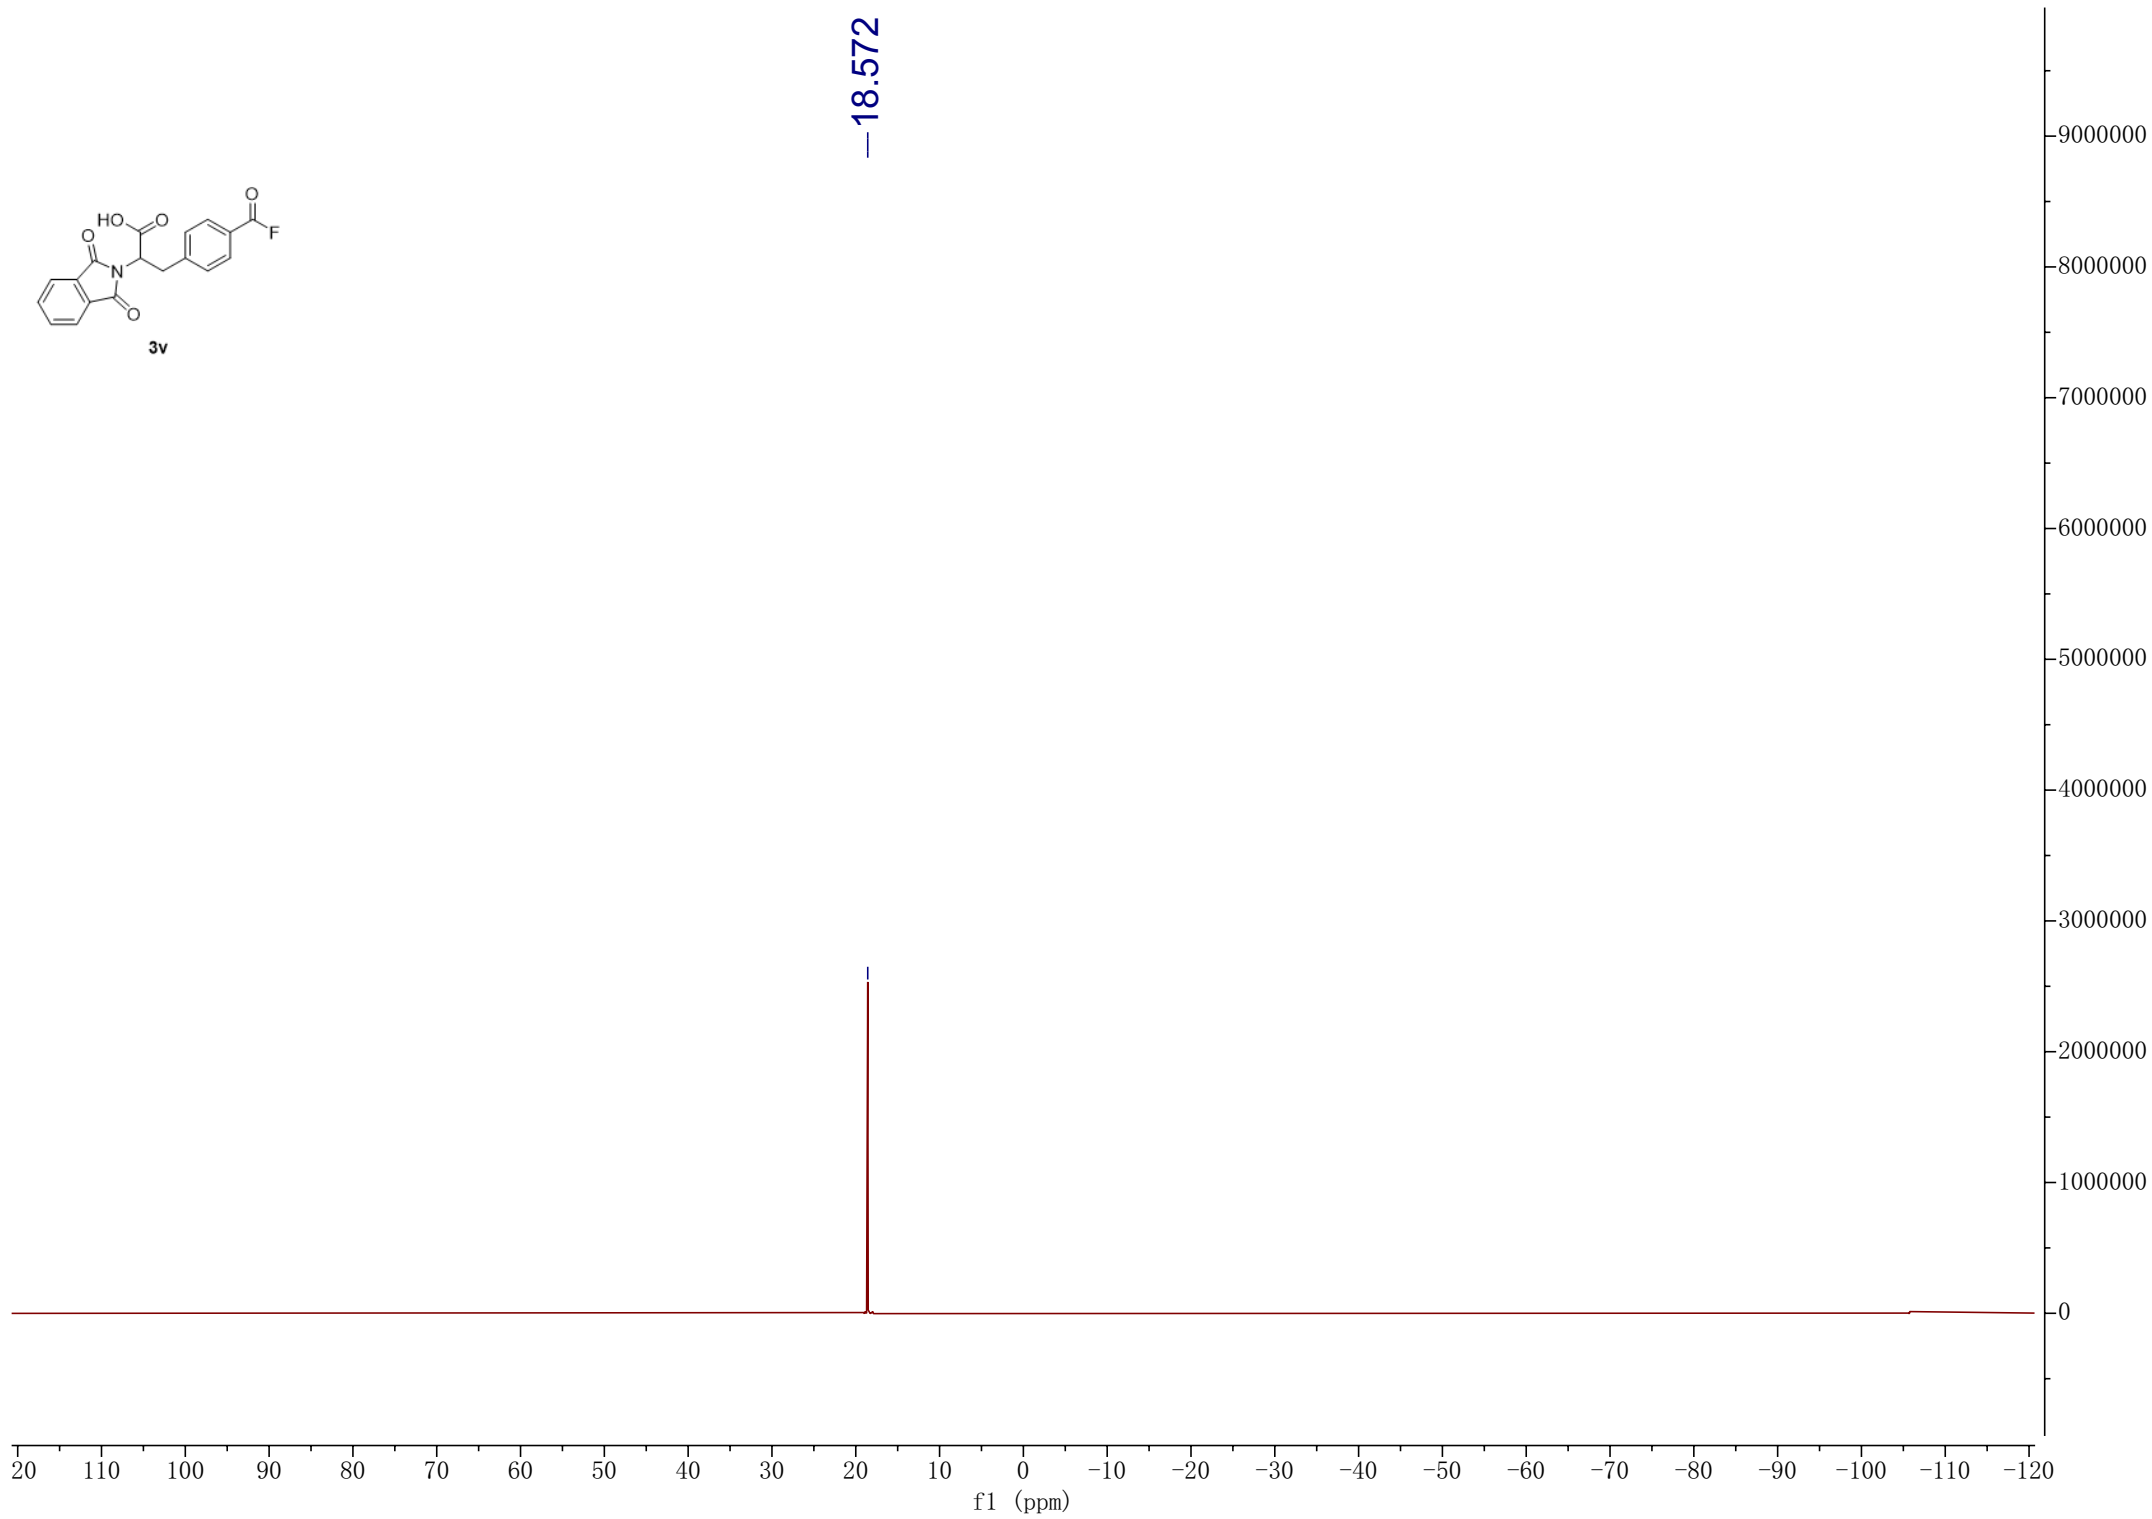

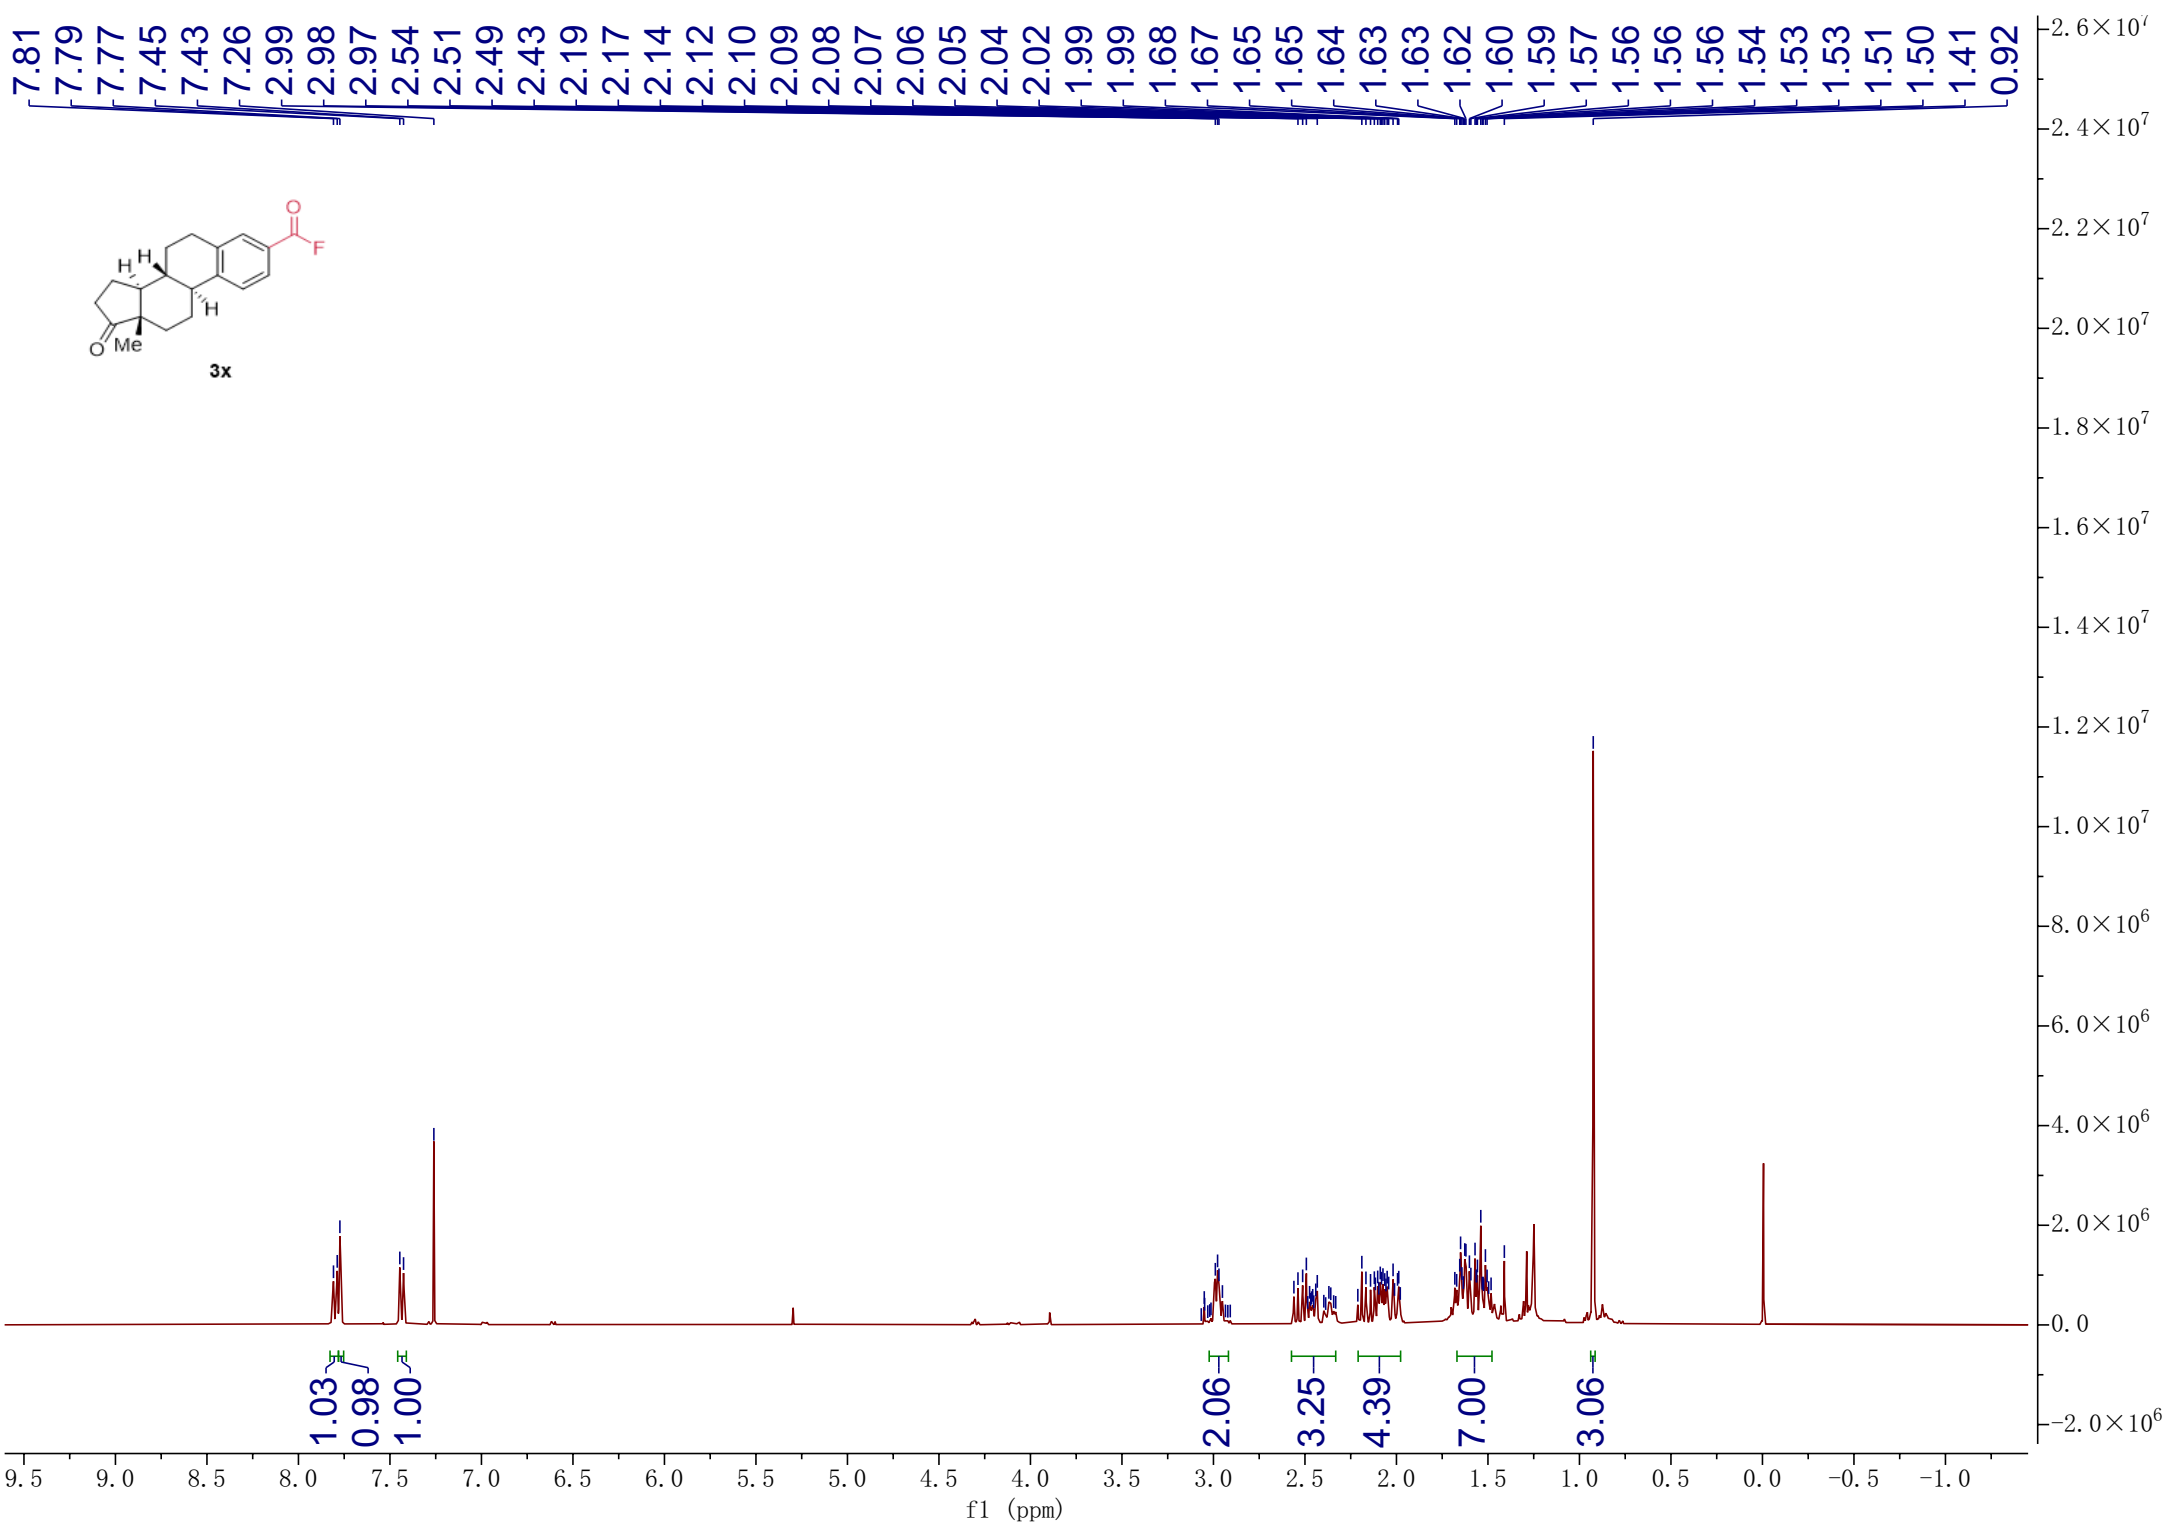

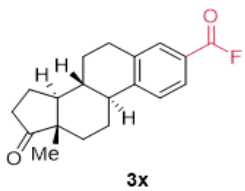

-17.79

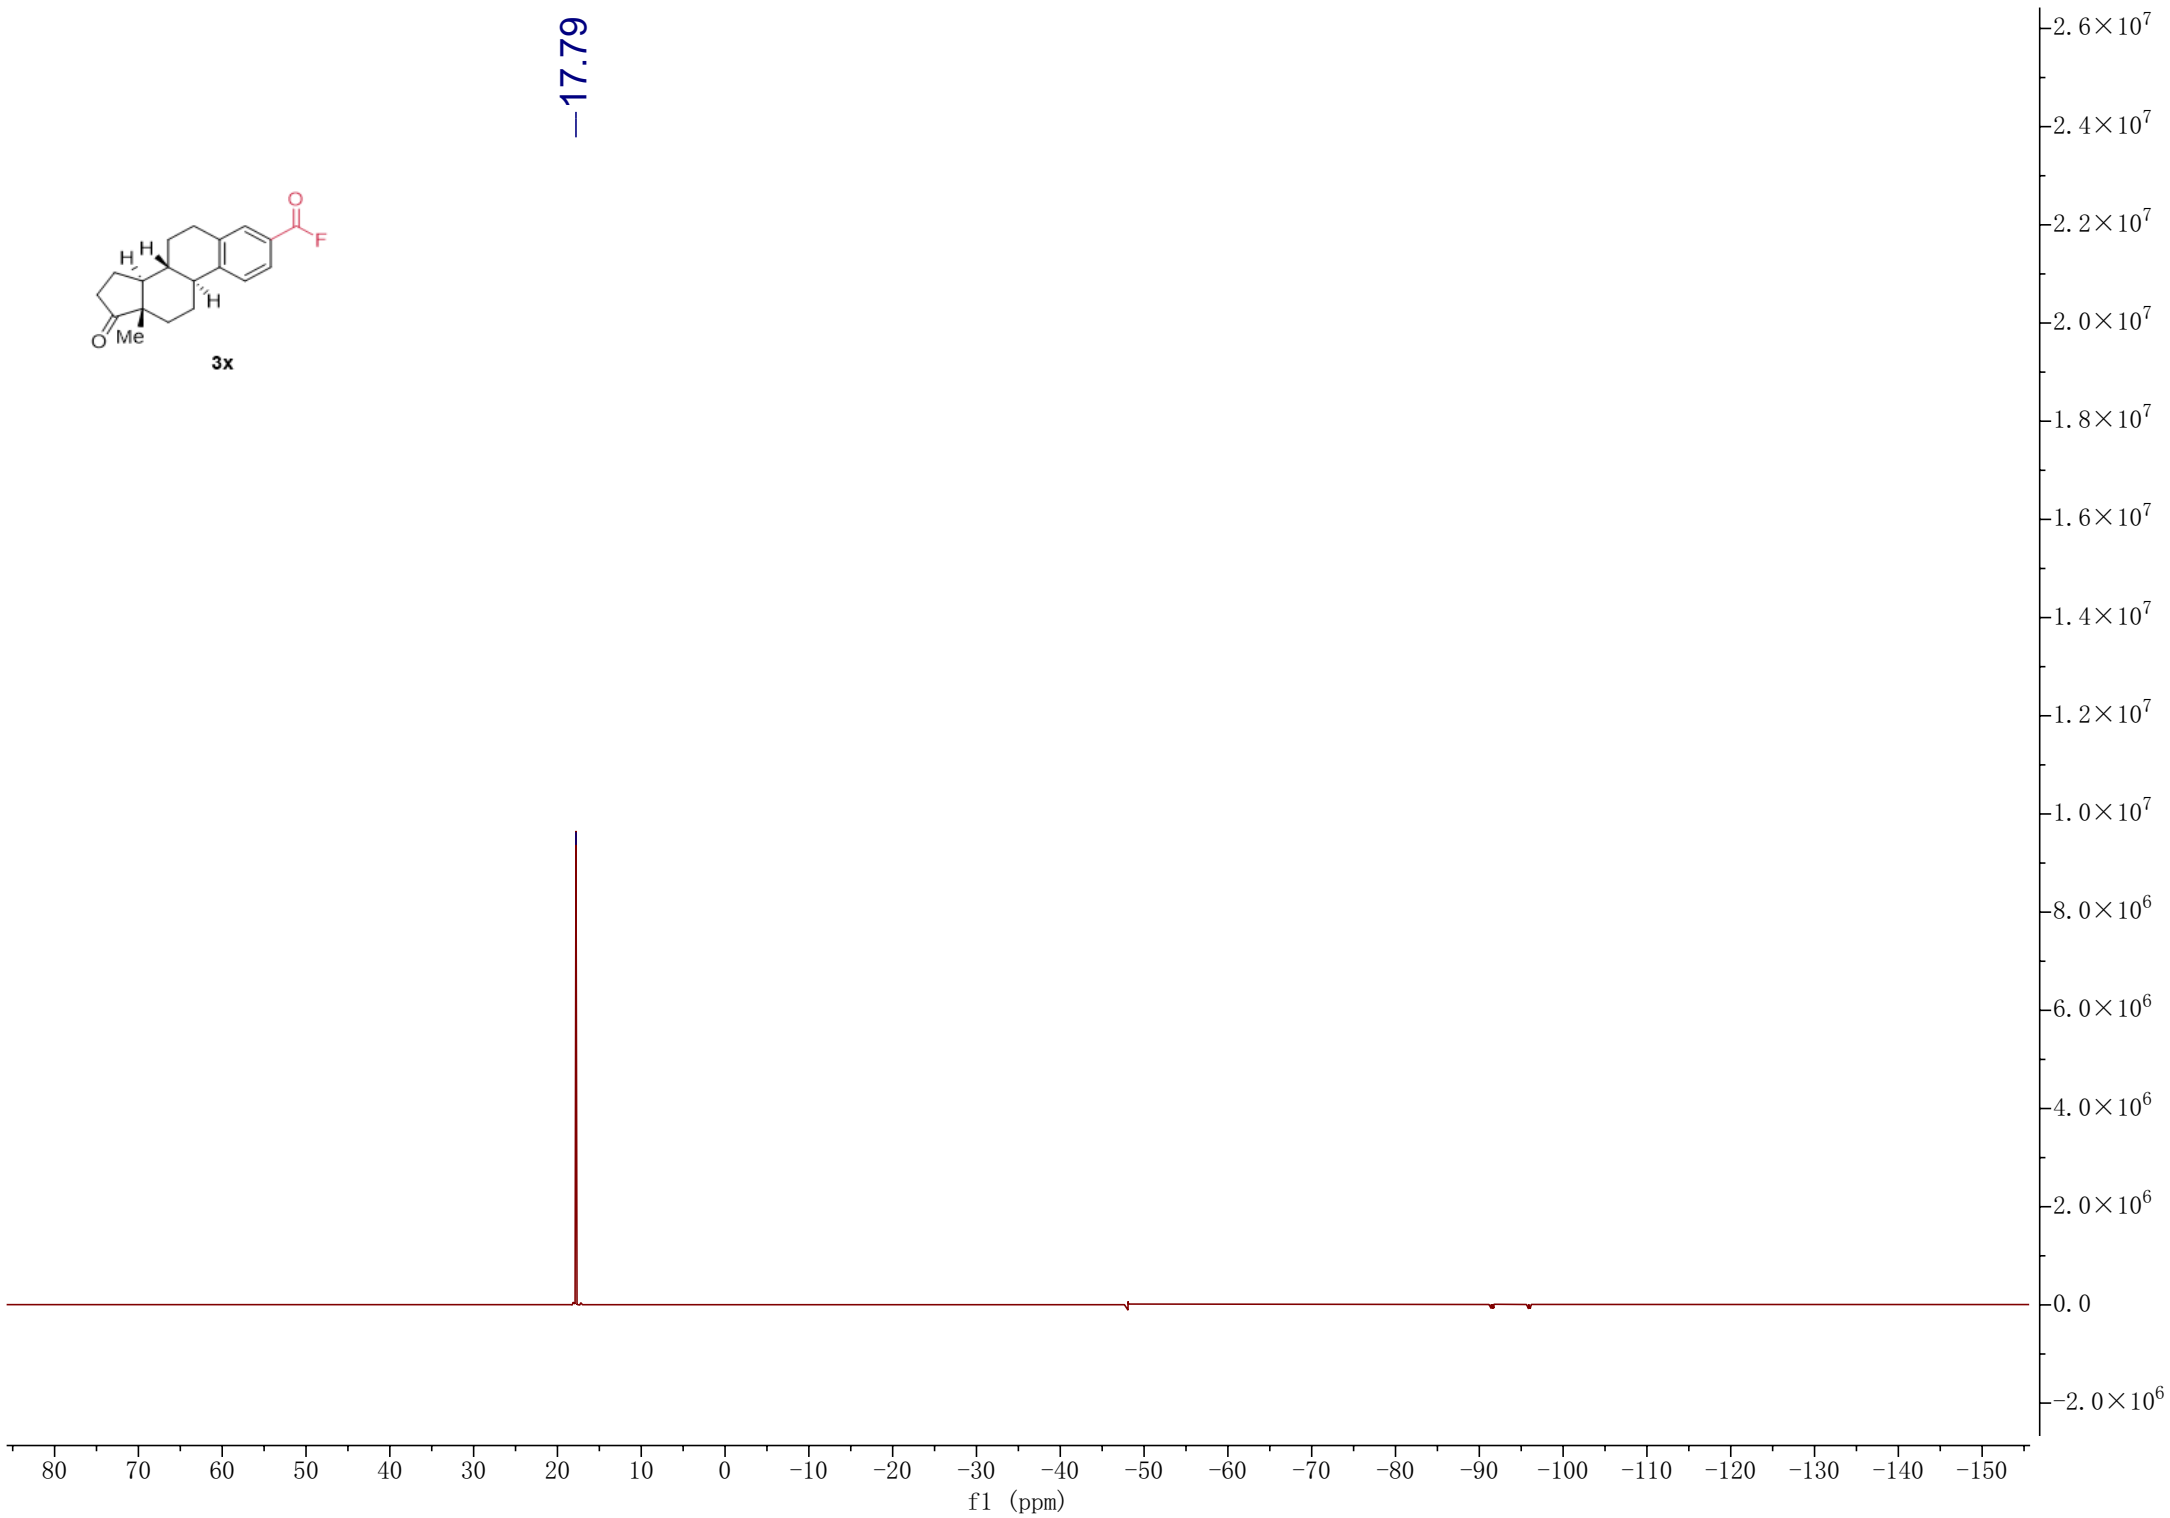

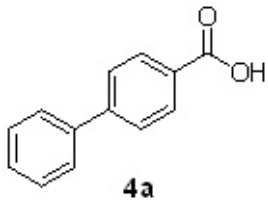

12.955

8.031  
8.017  
7.804  
7.791  
7.738  
7.725  
7.515  
7.502  
7.489  
7.436  
7.423  
7.411

2.506  
2.503  
2.500  
2.497  
2.494

1.00

2.00  
2.07  
2.06  
2.04  
1.00

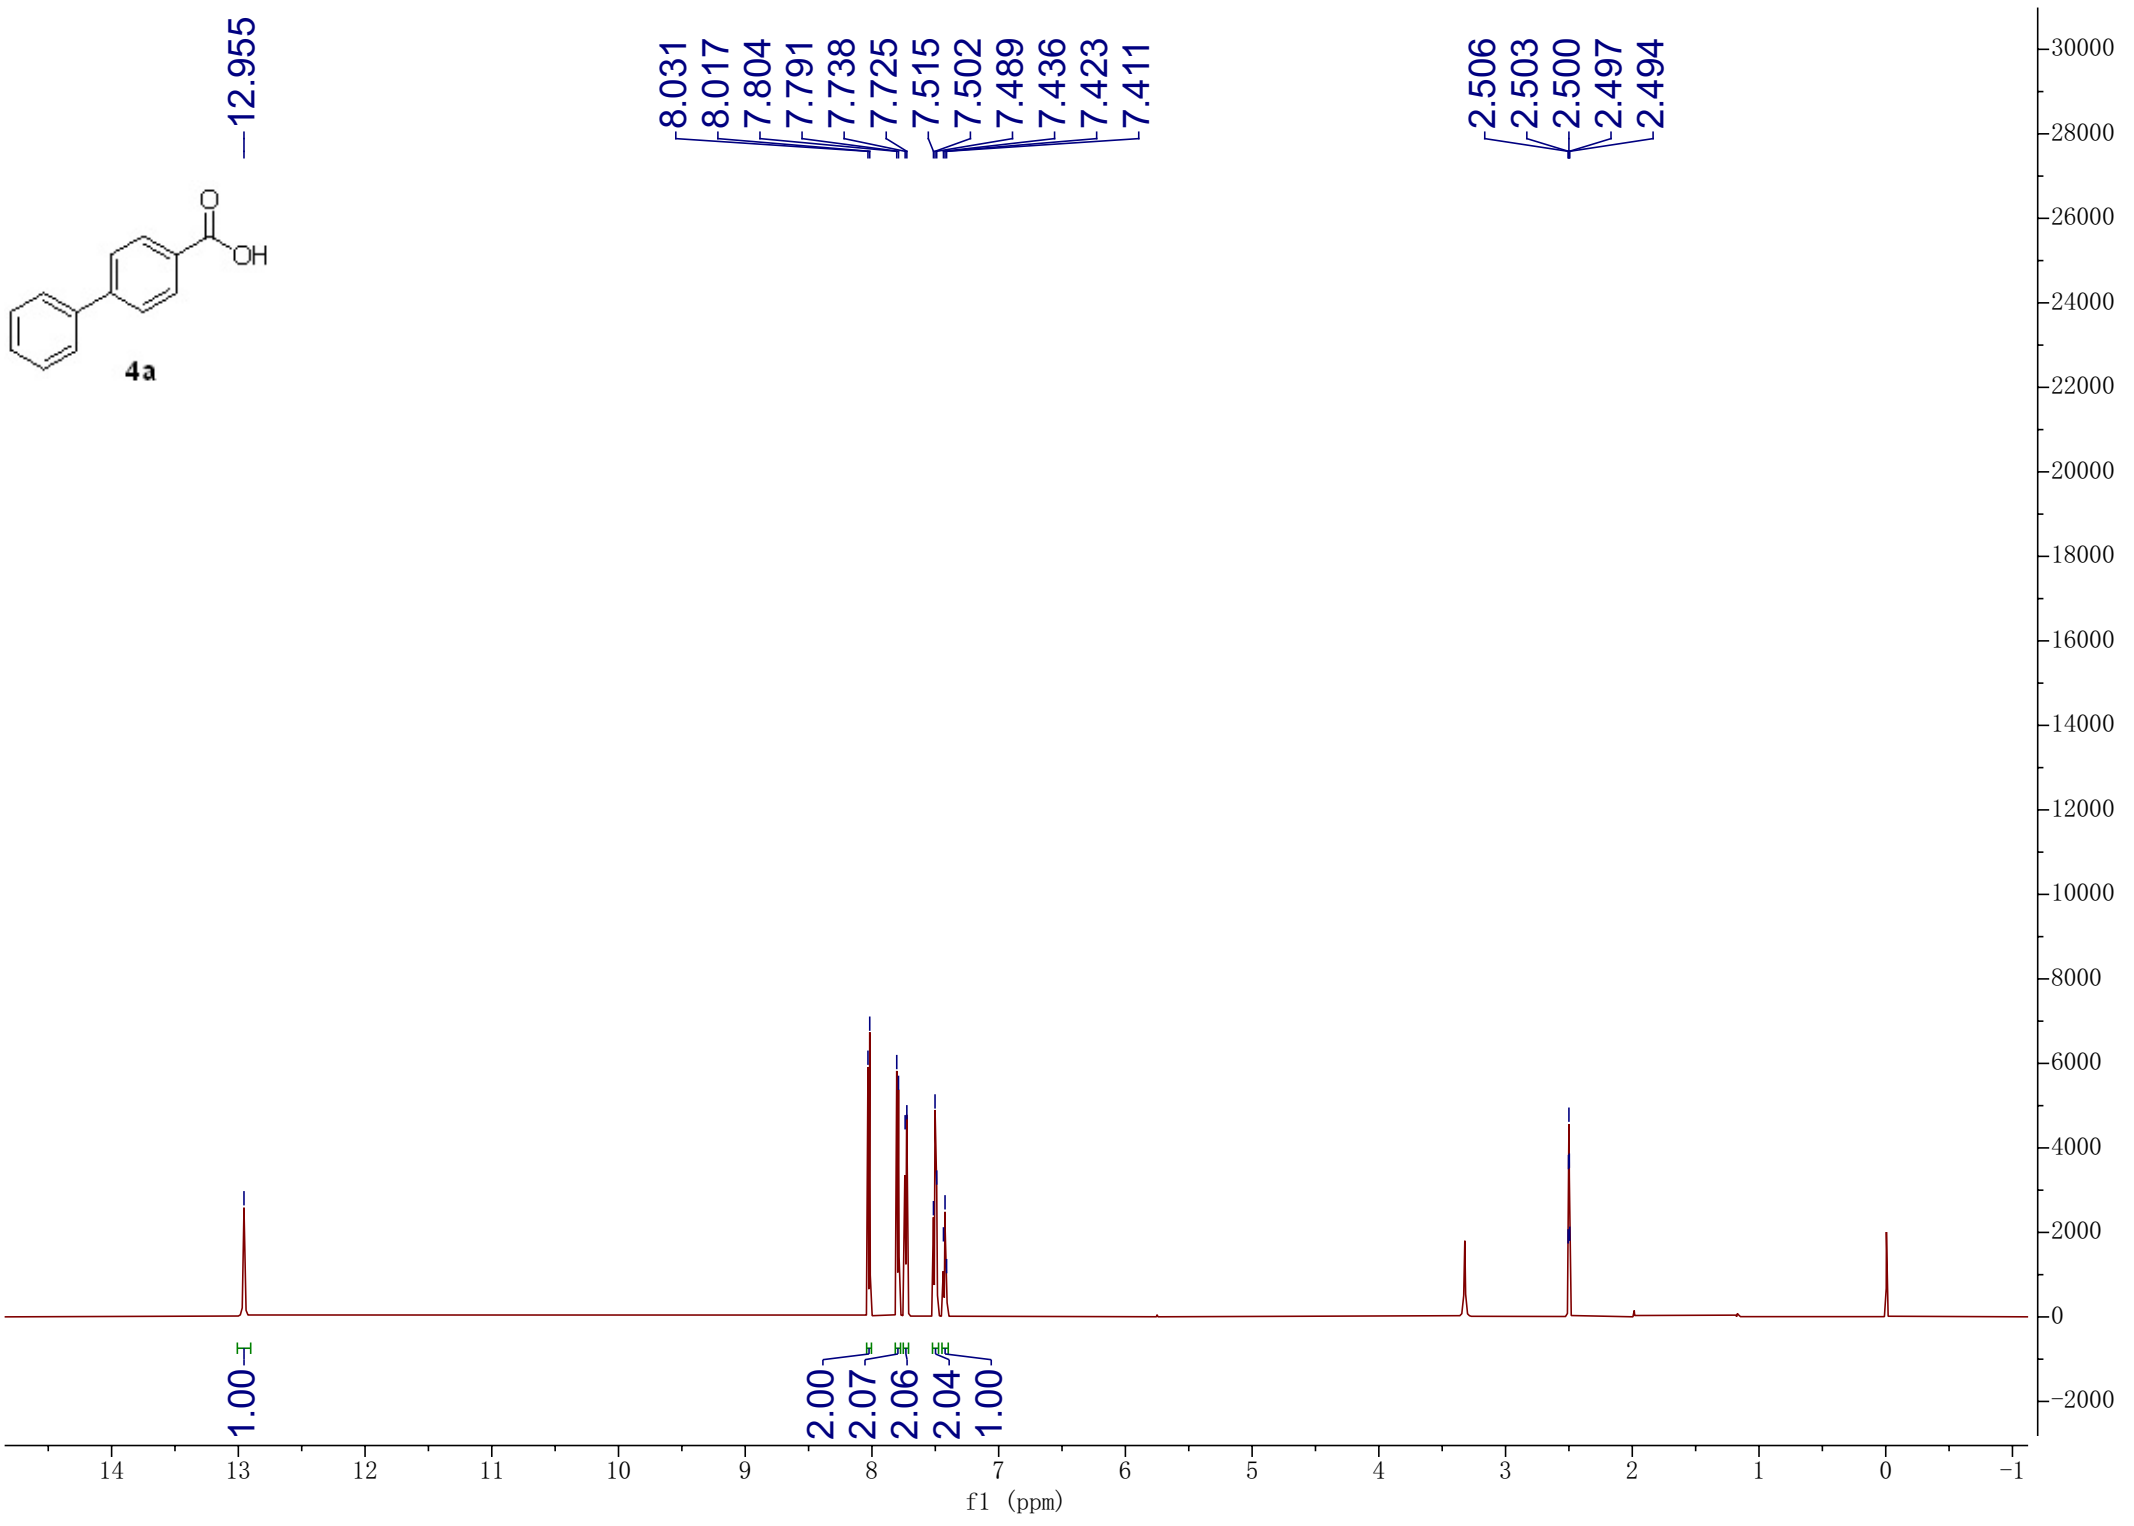

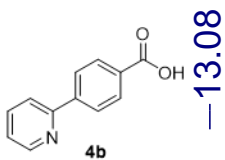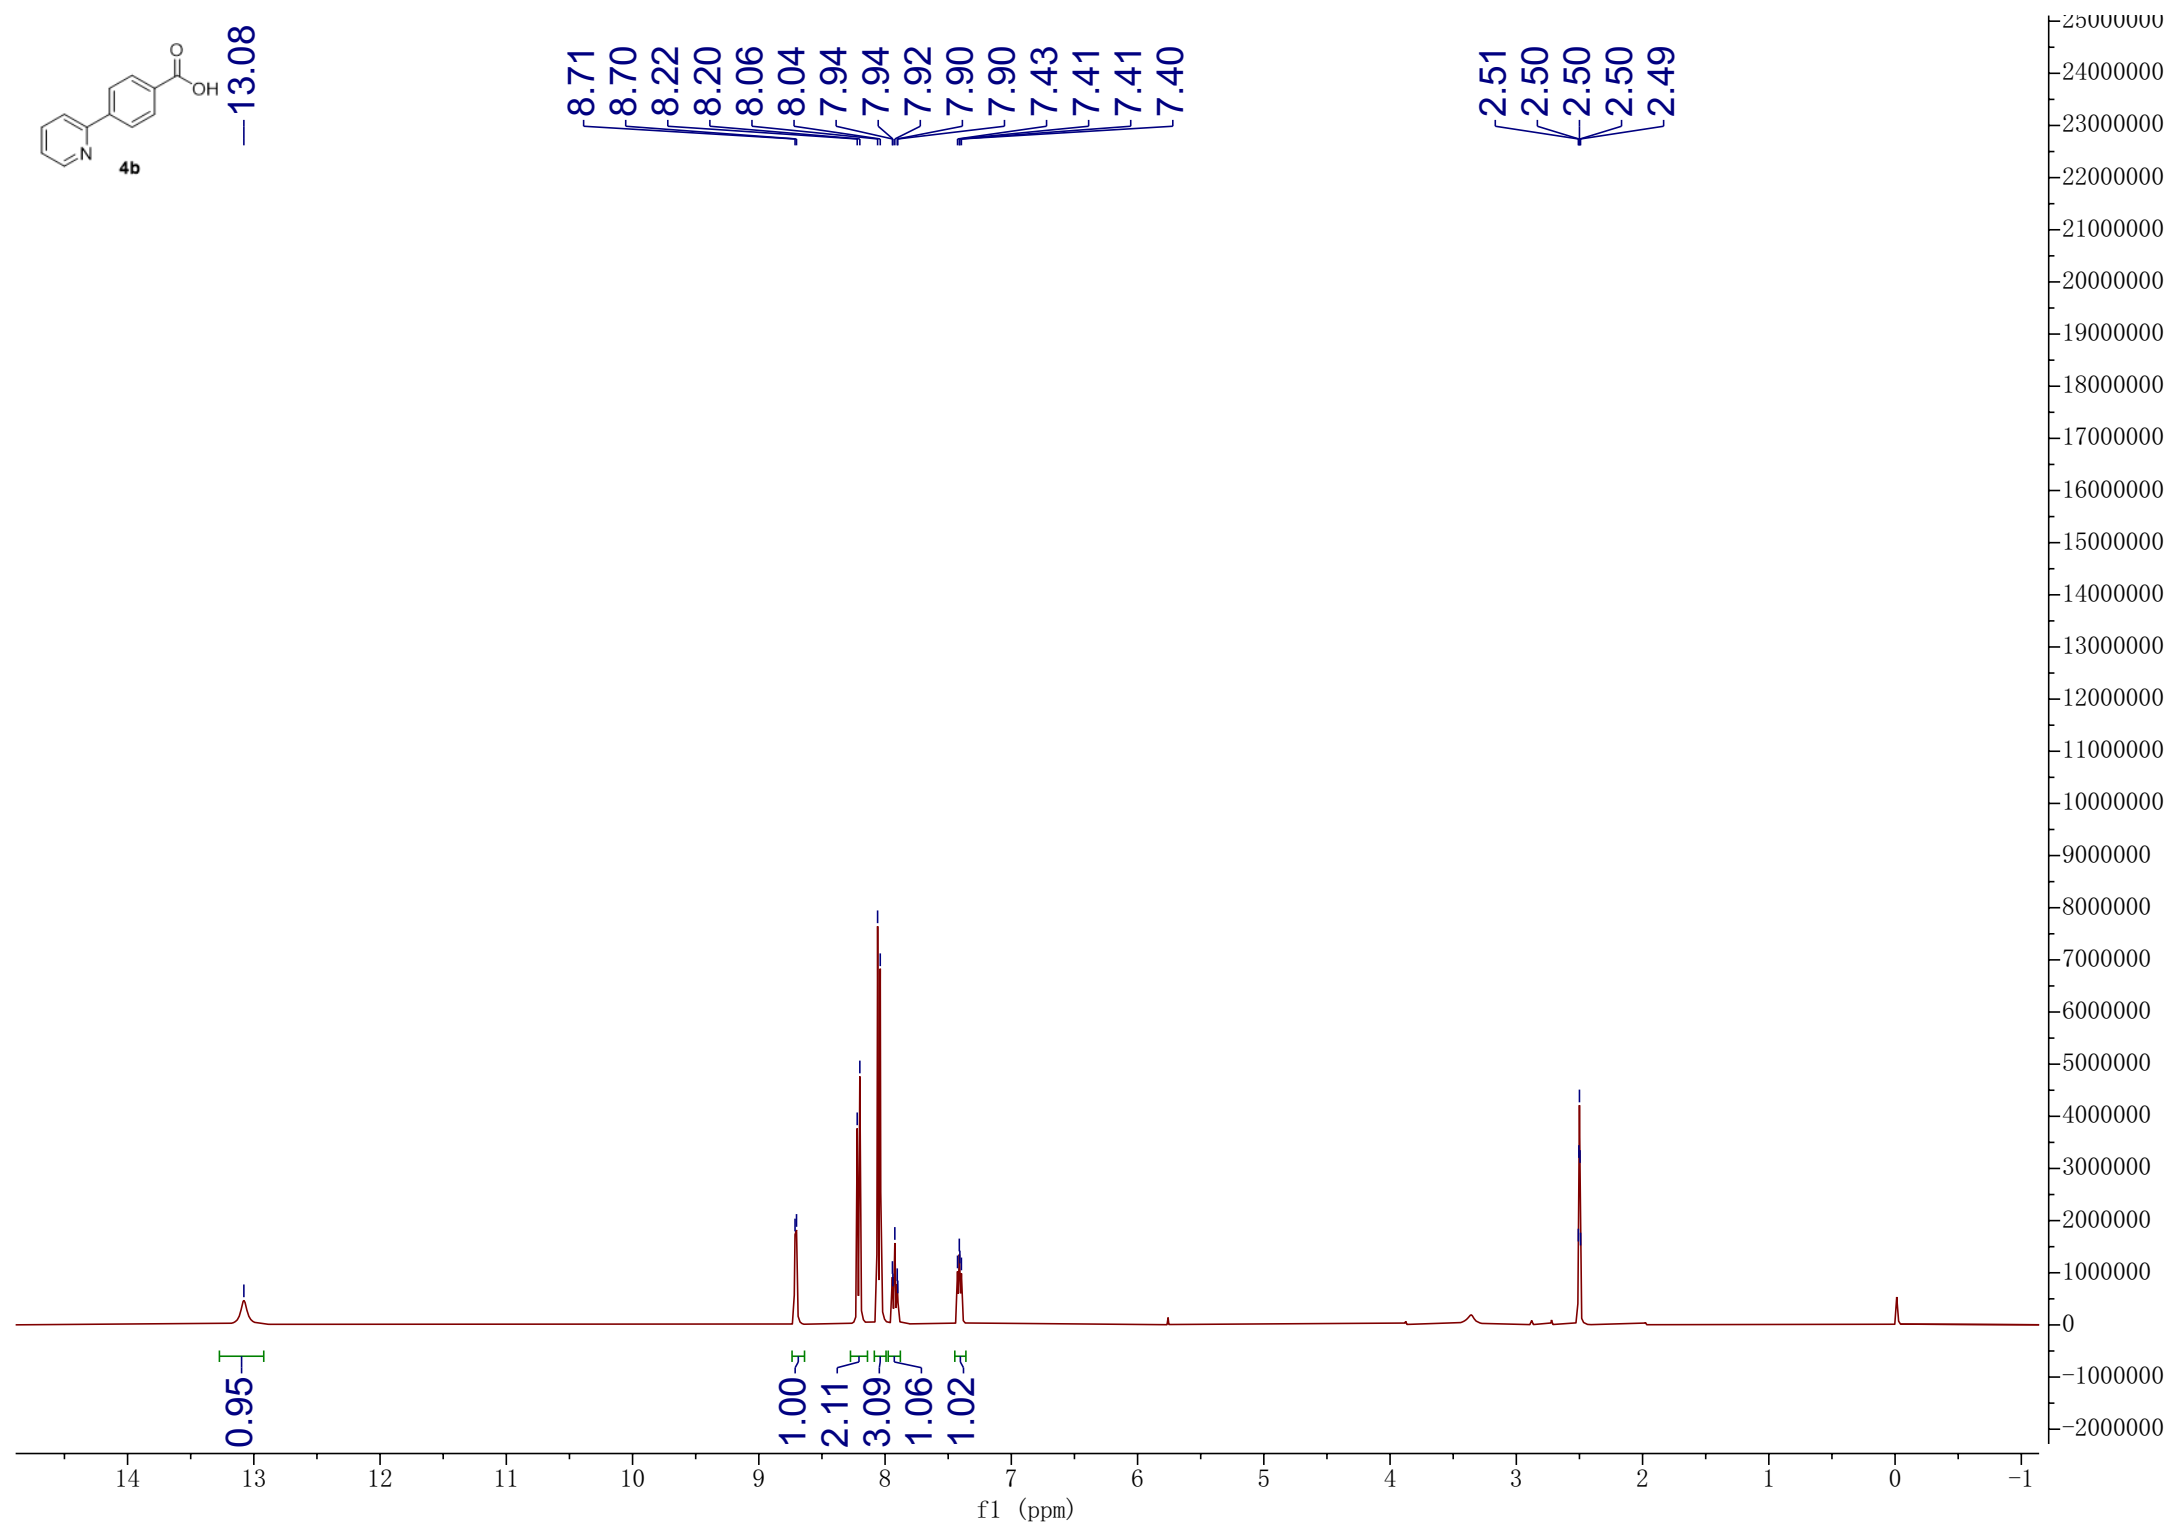

13.087

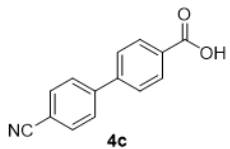

8.059  
8.045  
7.958  
7.954  
7.950  
7.947  
7.886  
7.883  
7.872  
7.869

2.506  
2.503  
2.500  
2.497  
2.494

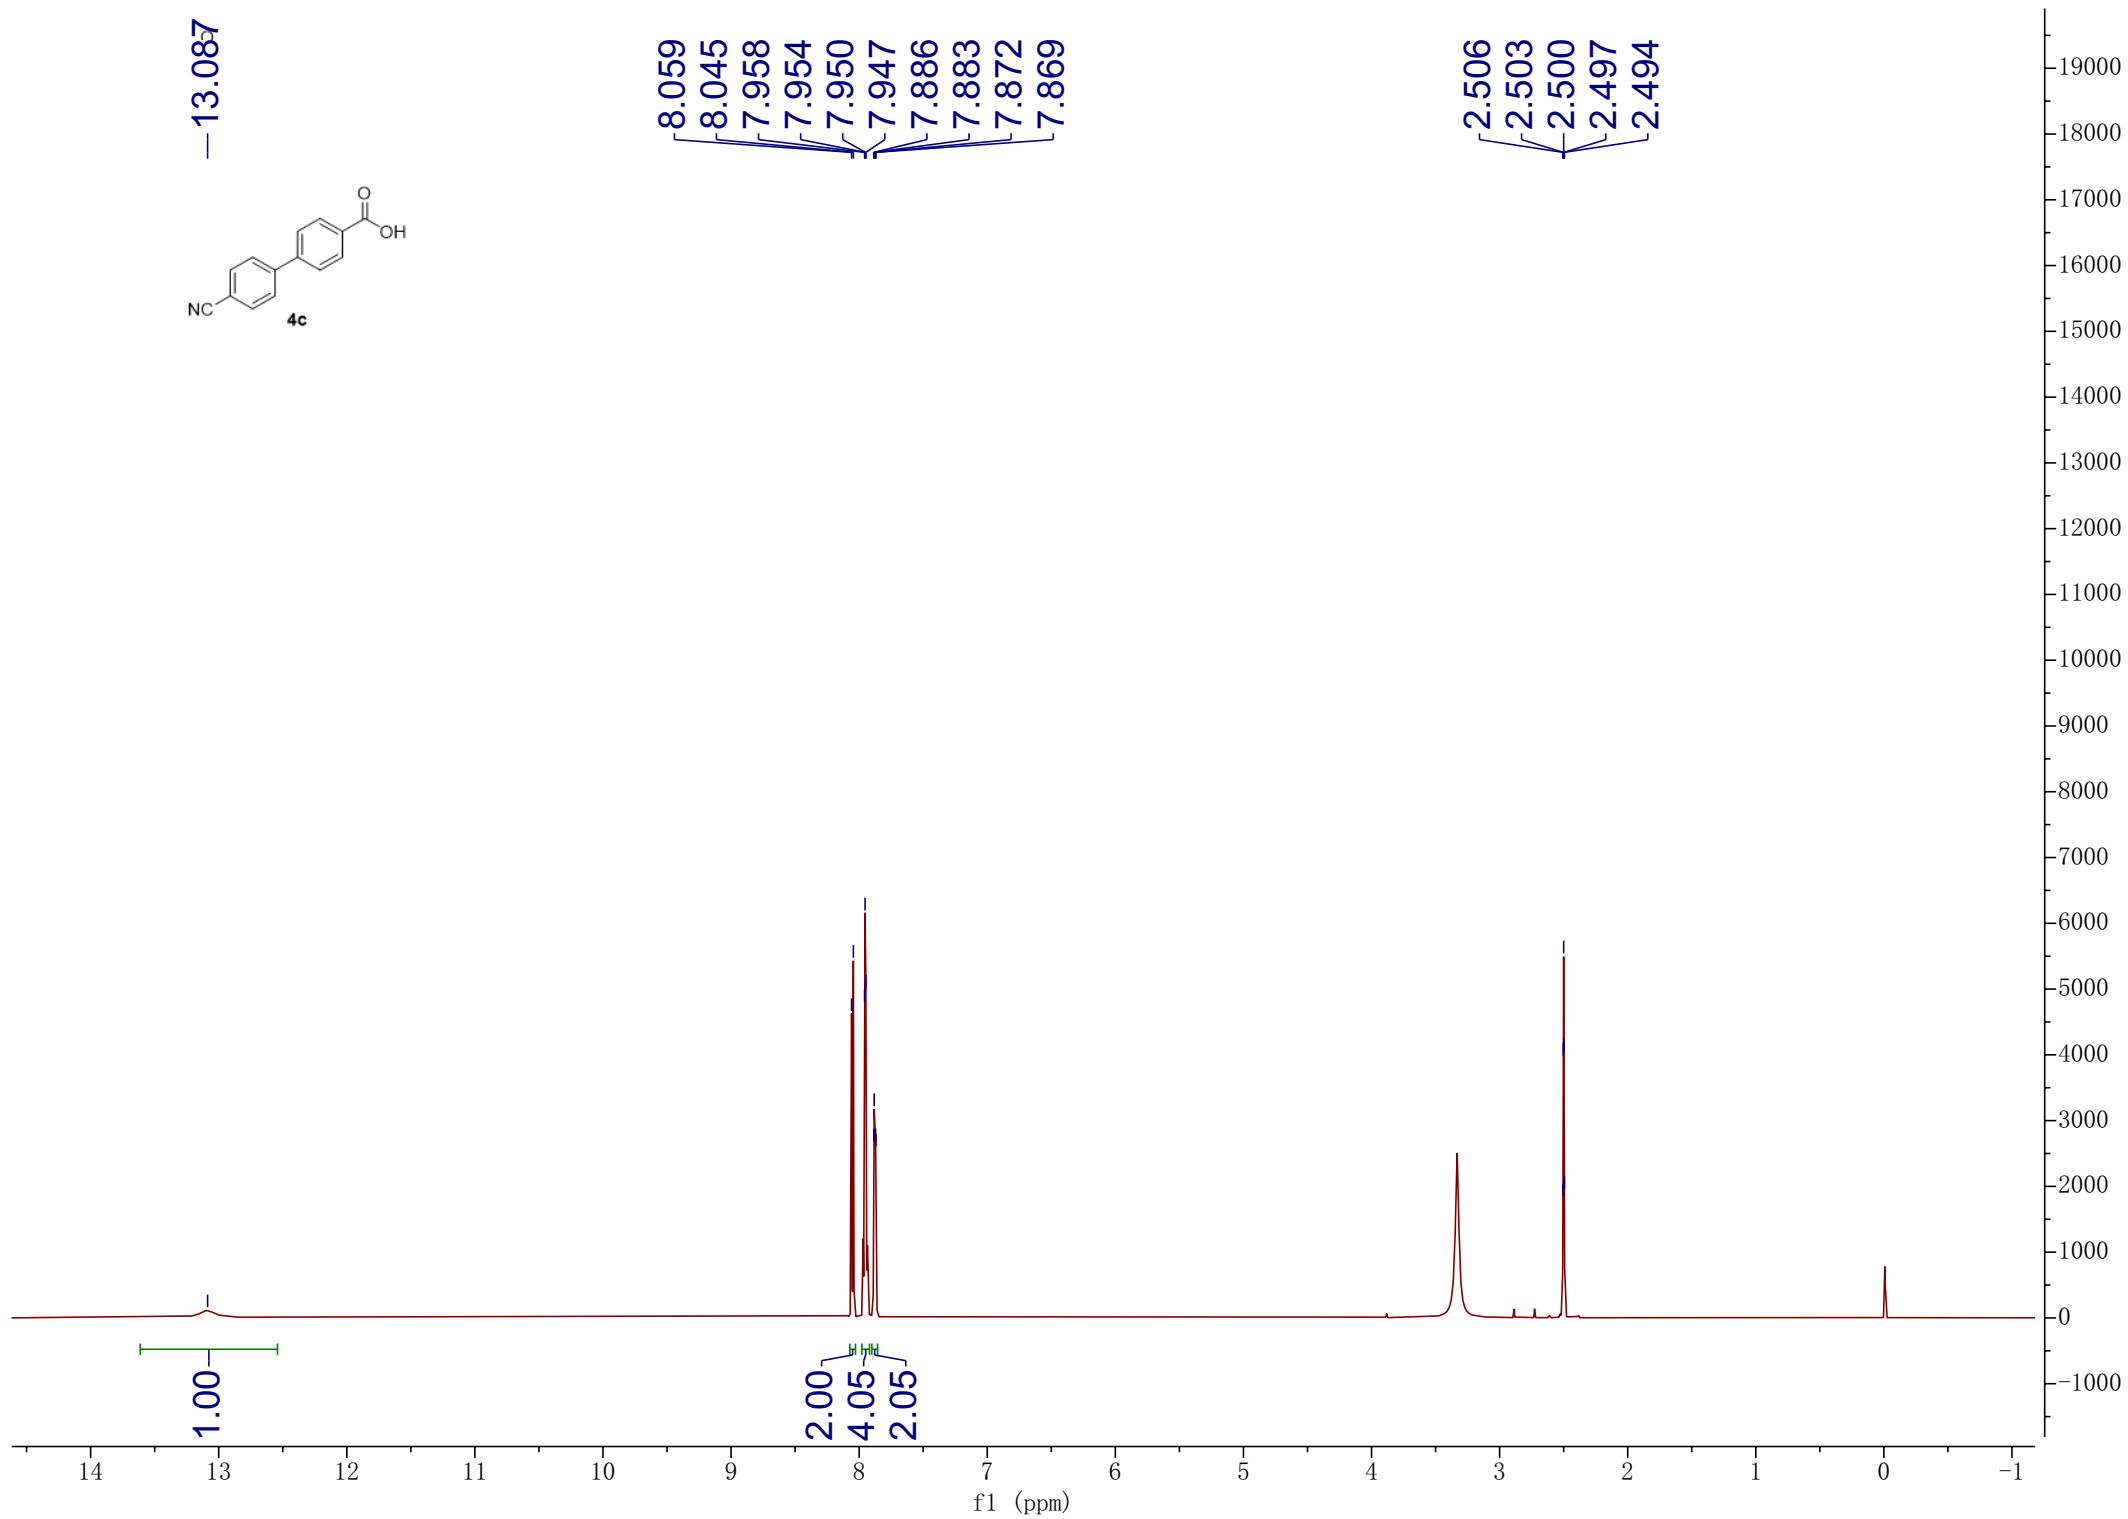

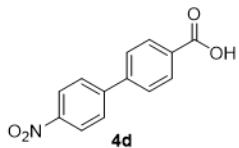

—13.115

8.330  
8.316  
8.075  
8.061  
8.023  
8.009  
7.911  
7.898

2.506  
2.503  
2.500  
2.497  
2.494

0.99

2.00  
2.01  
2.10  
2.08

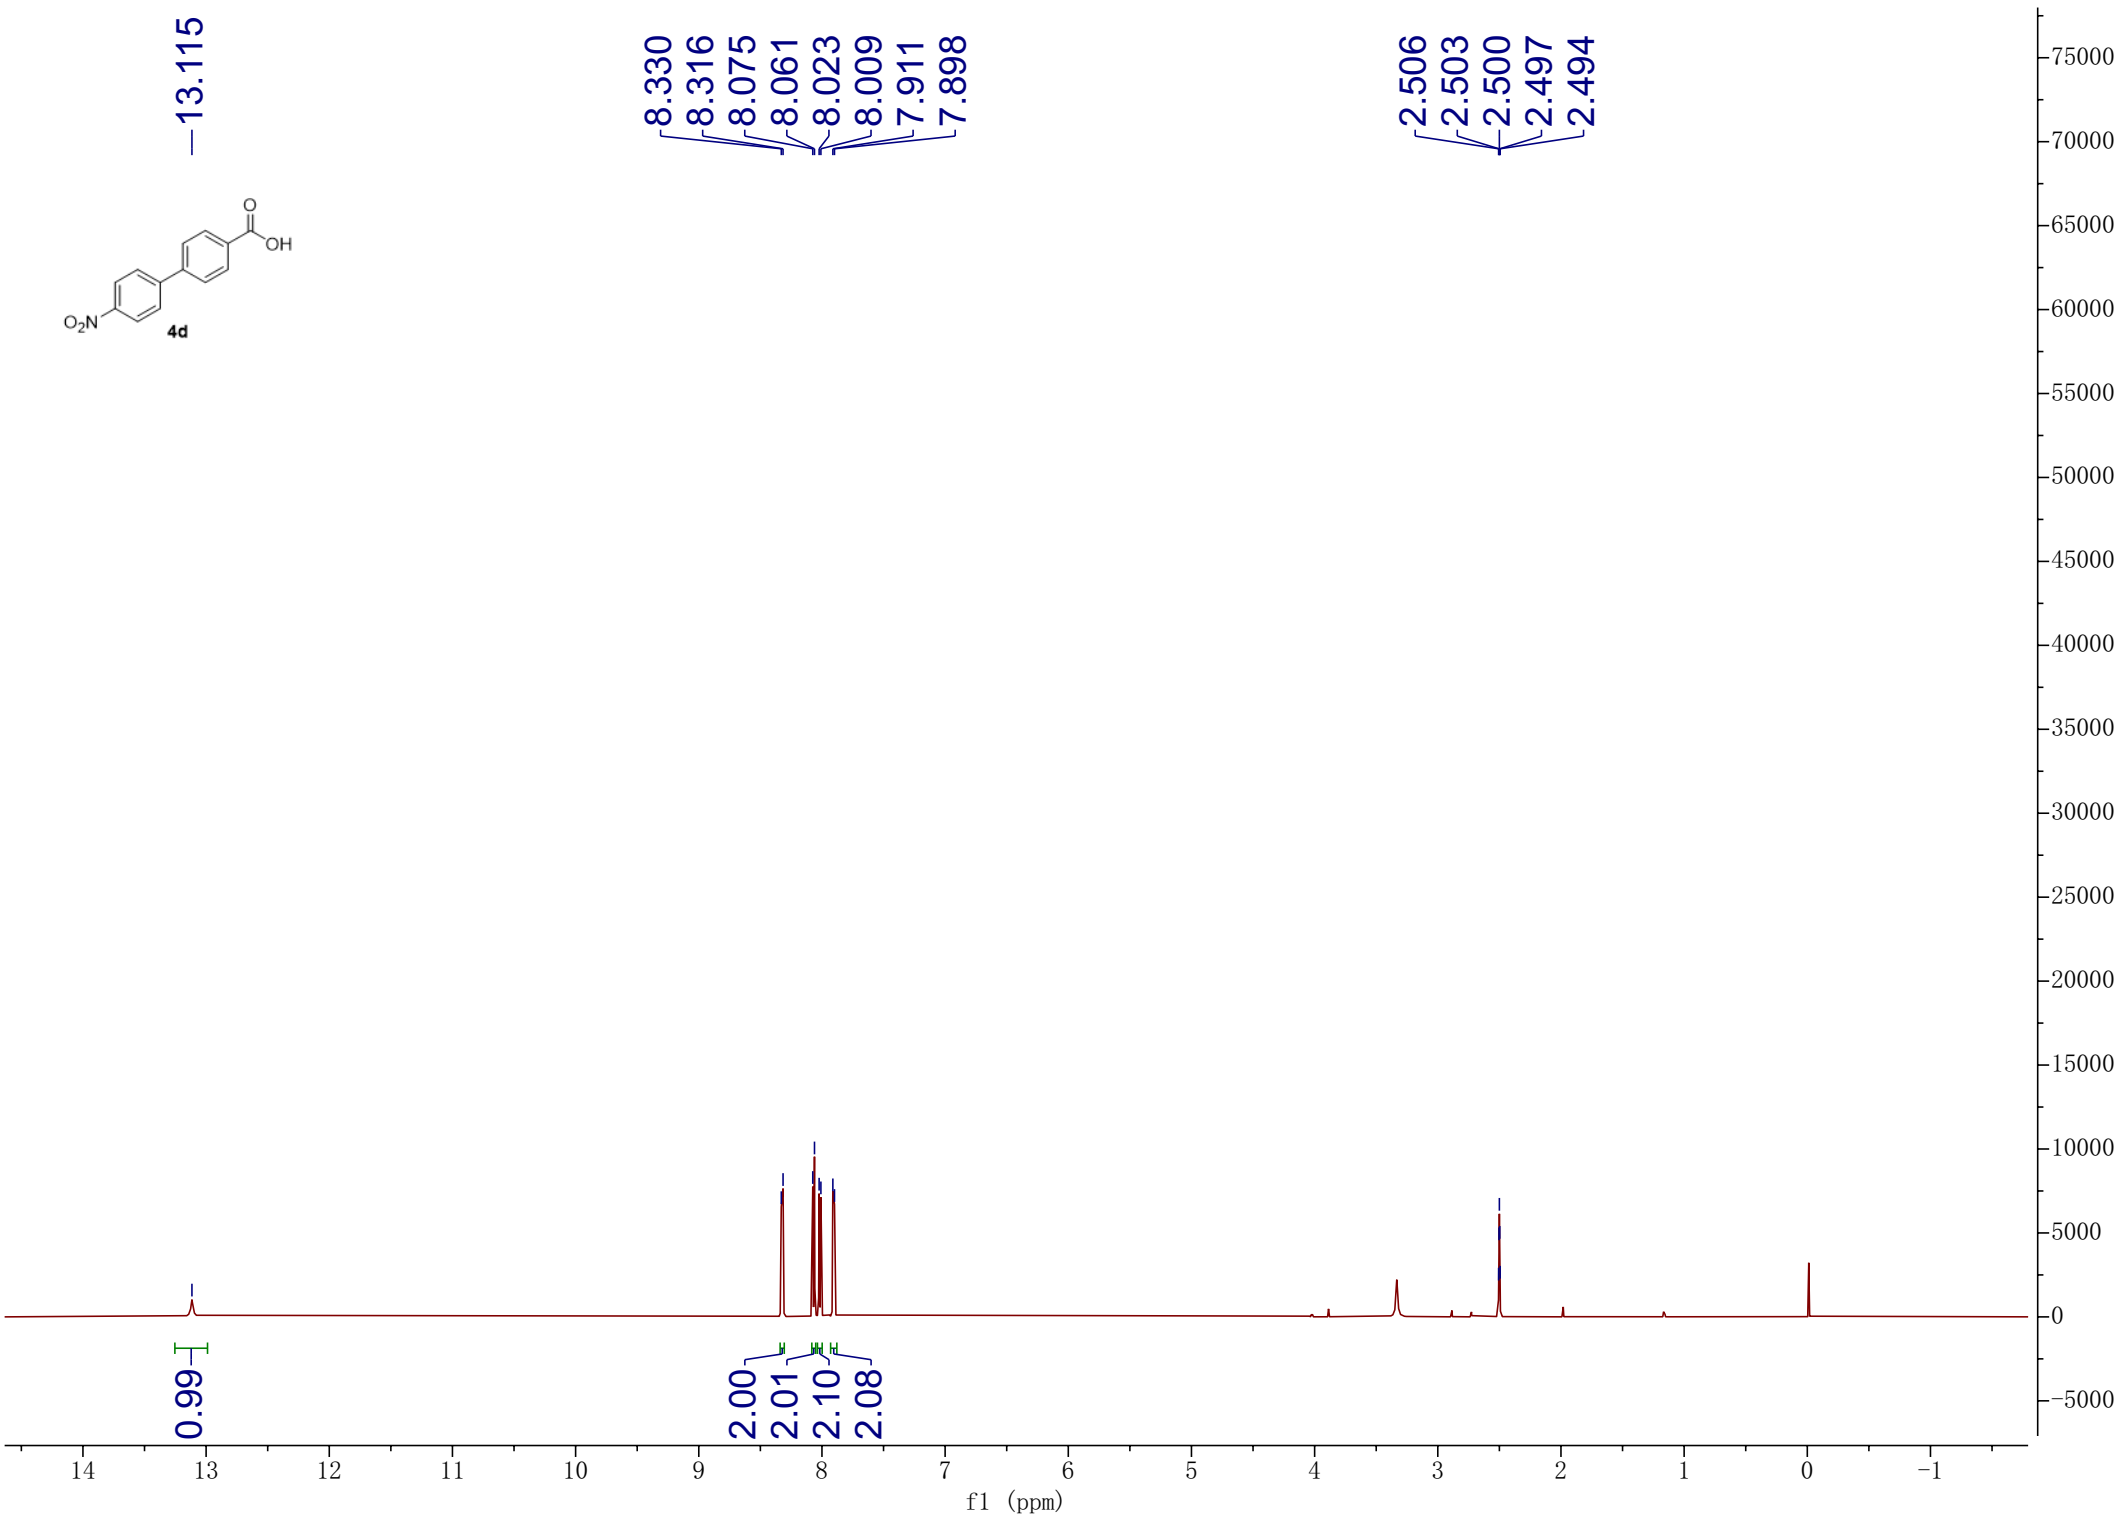

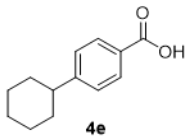

8.043  
8.031

7.316  
7.302  
7.260

2.604  
2.598  
2.590  
2.585  
2.579  
2.565  
1.903  
1.898  
1.887  
1.885  
1.881  
1.877  
1.871  
1.860  
1.855  
1.782  
1.760  
1.758  
1.460  
1.440  
1.435  
1.420  
1.415  
1.399  
1.289  
1.283  
1.277  
1.268  
1.262

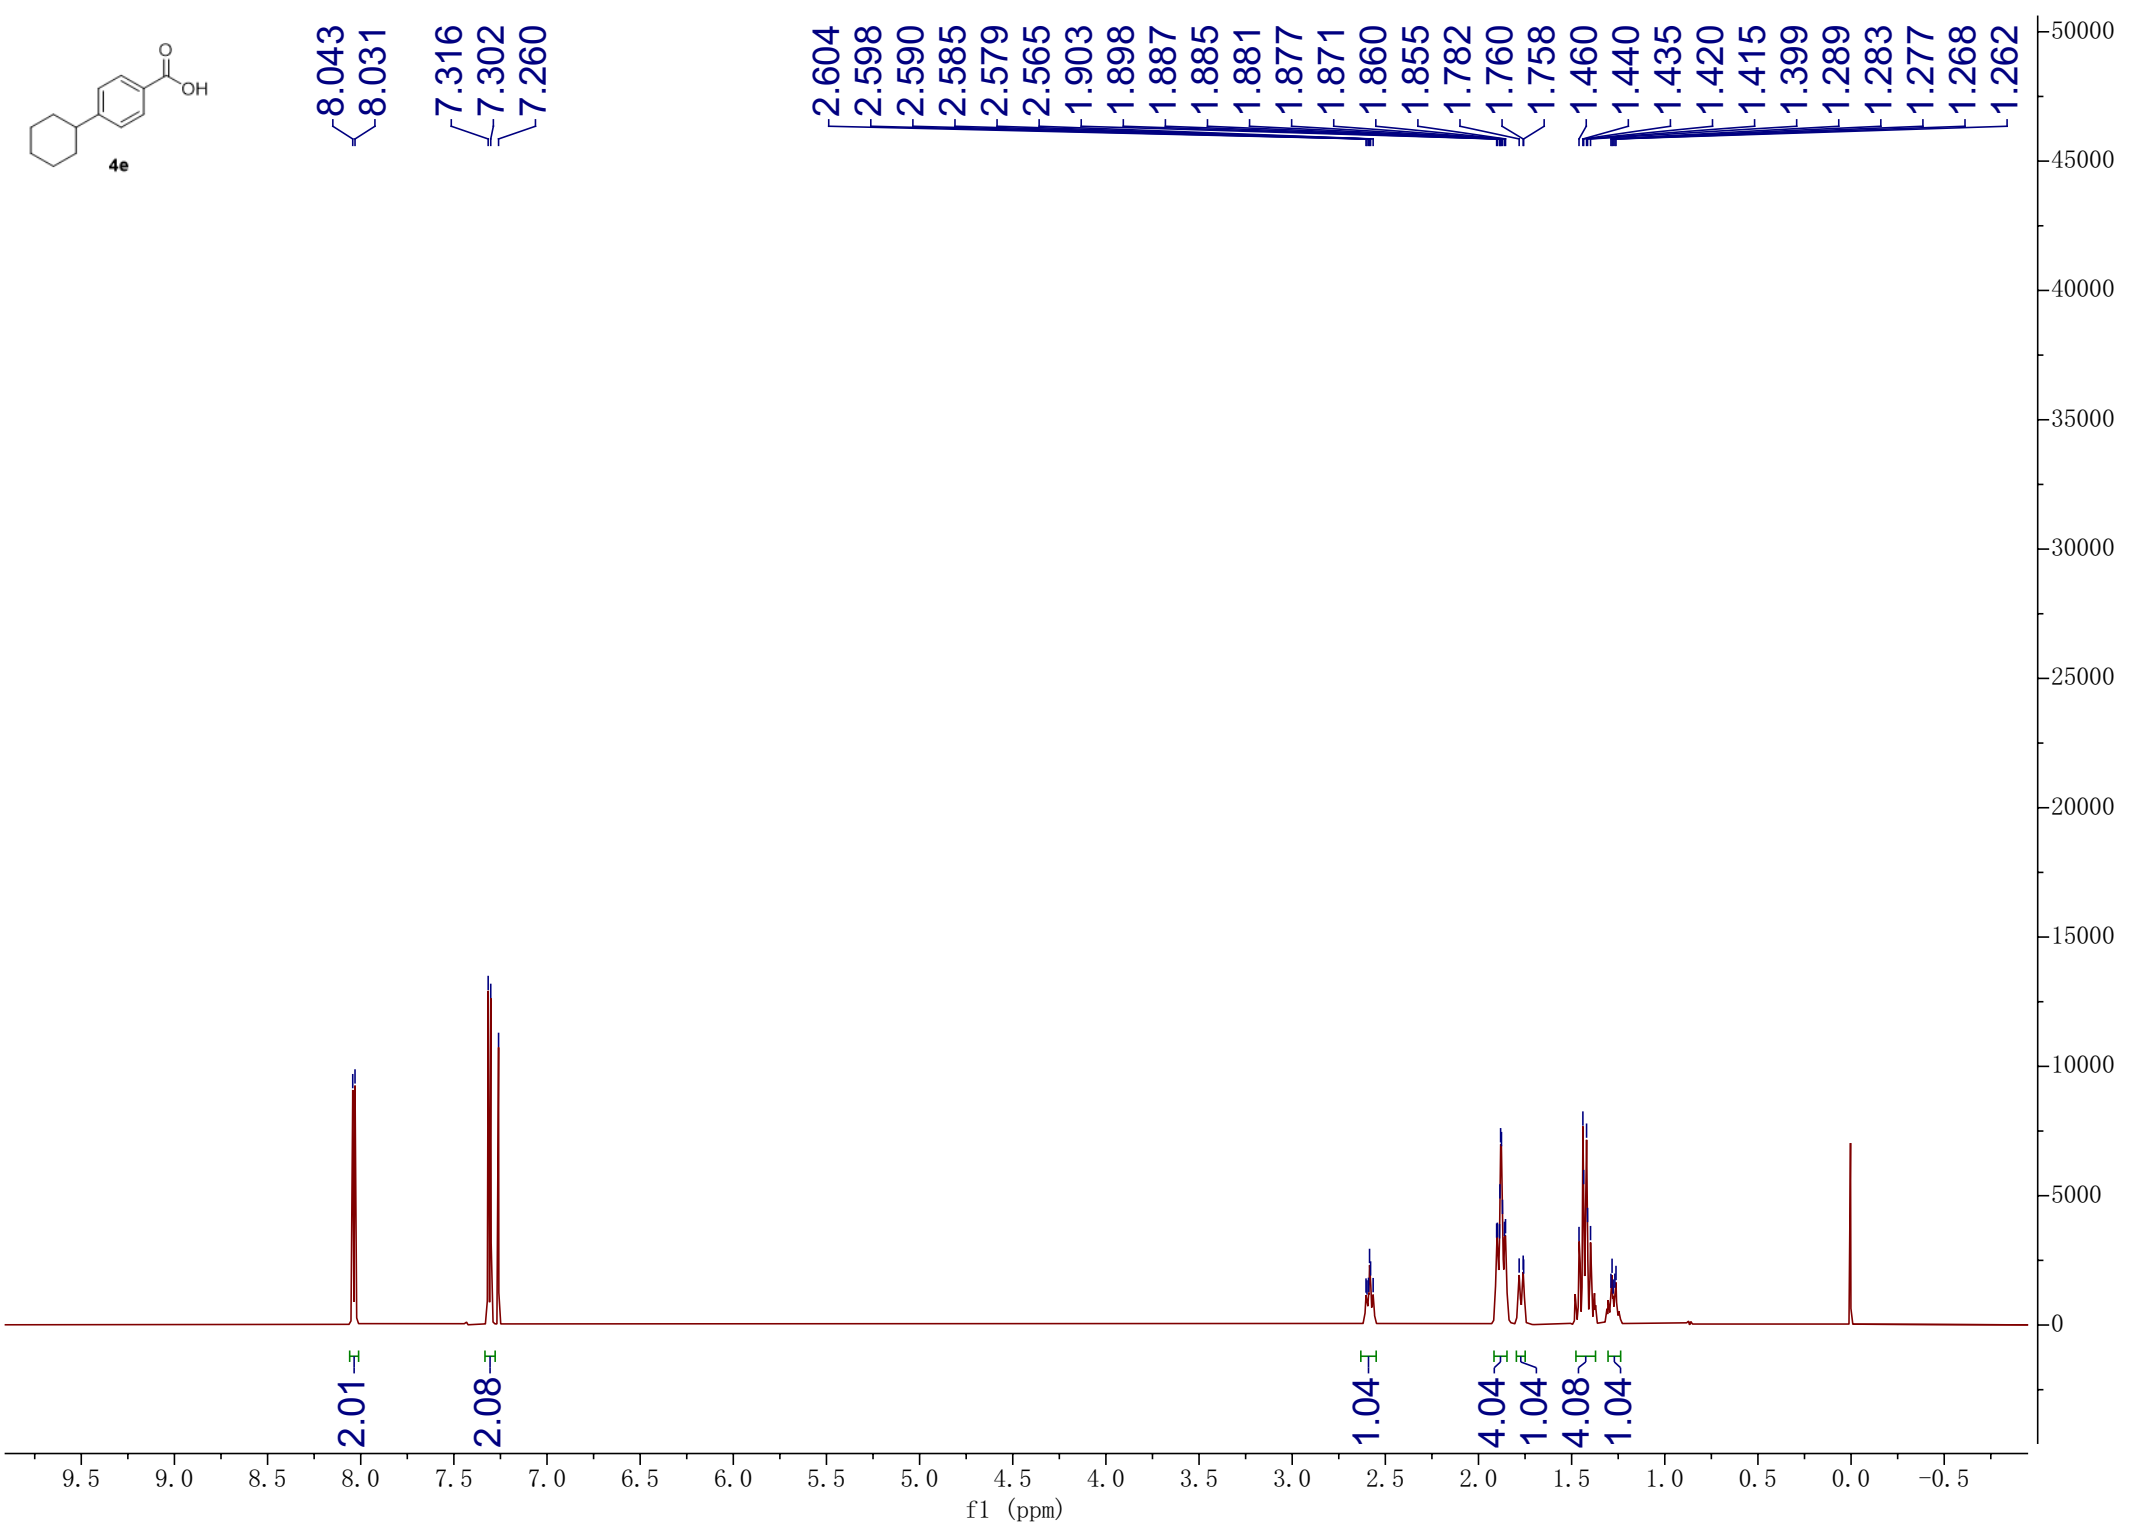

2.01

2.08

1.04

4.04

1.04

4.08

1.04

9.5 9.0 8.5 8.0 7.5 7.0 6.5 6.0 5.5 5.0 4.5 4.0 3.5 3.0 2.5 2.0 1.5 1.0 0.5 0.0 -0.5

f1 (ppm)

50000  
45000  
40000  
35000  
30000  
25000  
20000  
15000  
10000  
5000  
0



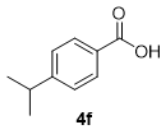

8.059  
8.045

7.340  
7.326  
7.260

3.024  
3.012  
3.000  
2.989  
2.977  
2.966  
2.954

1.292  
1.281

2.00

2.05

1.01

6.38

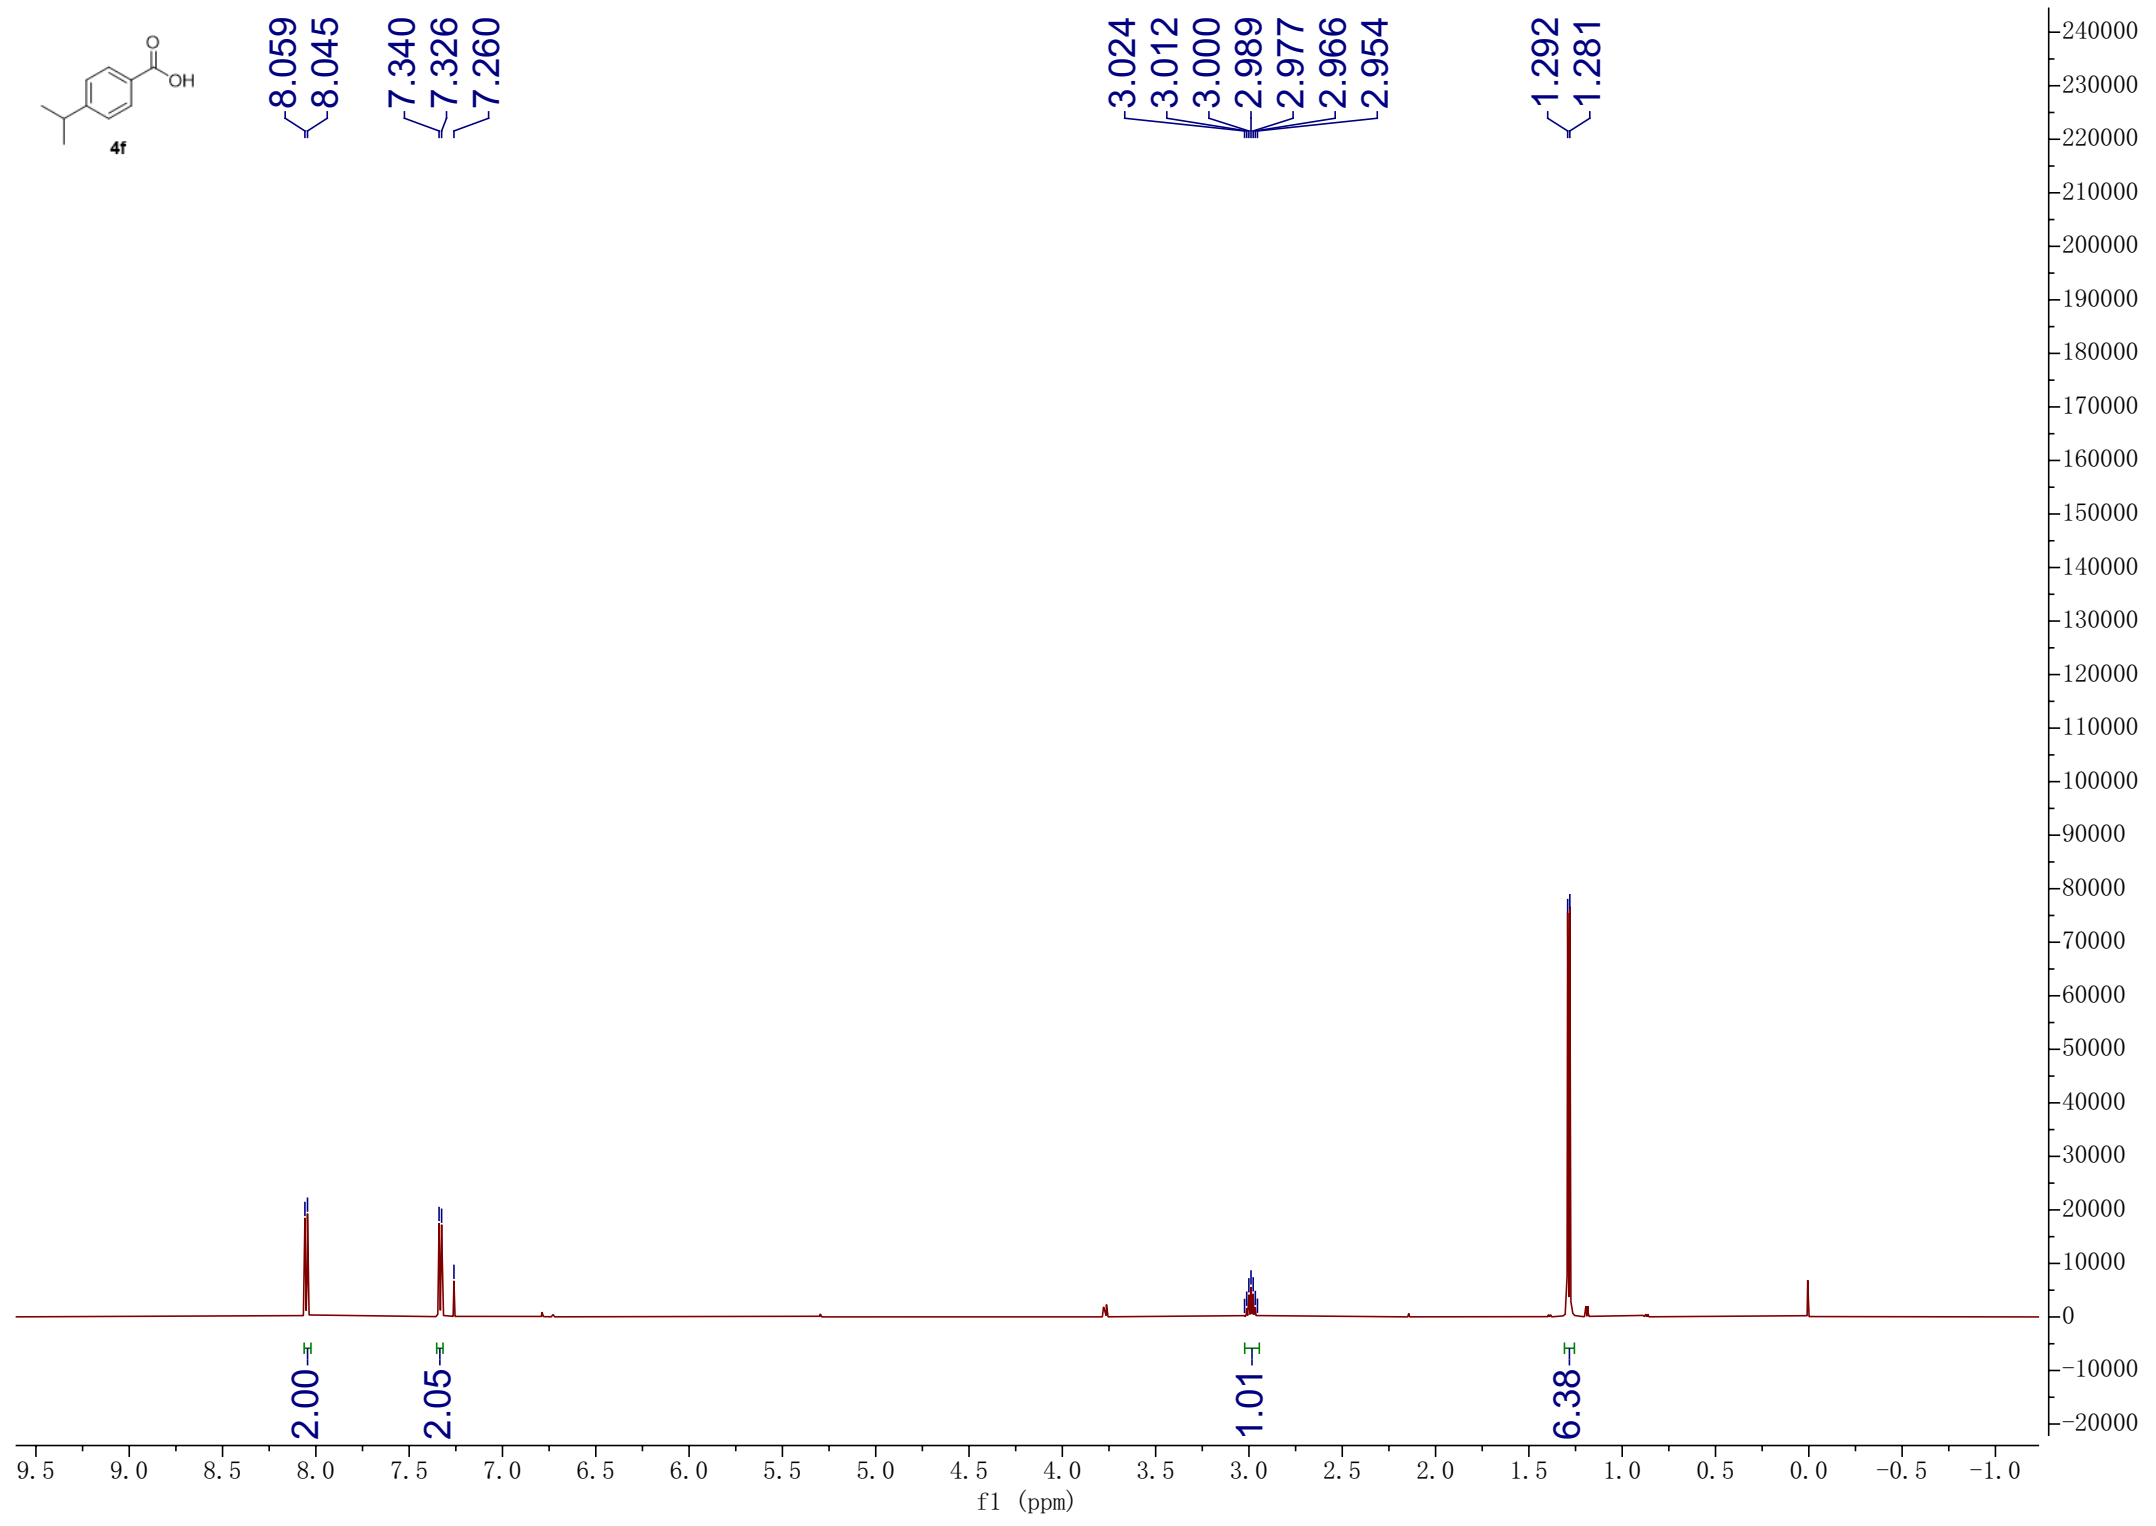

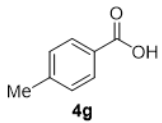

8.016  
8.003  
7.283  
7.270  
7.260

2.435

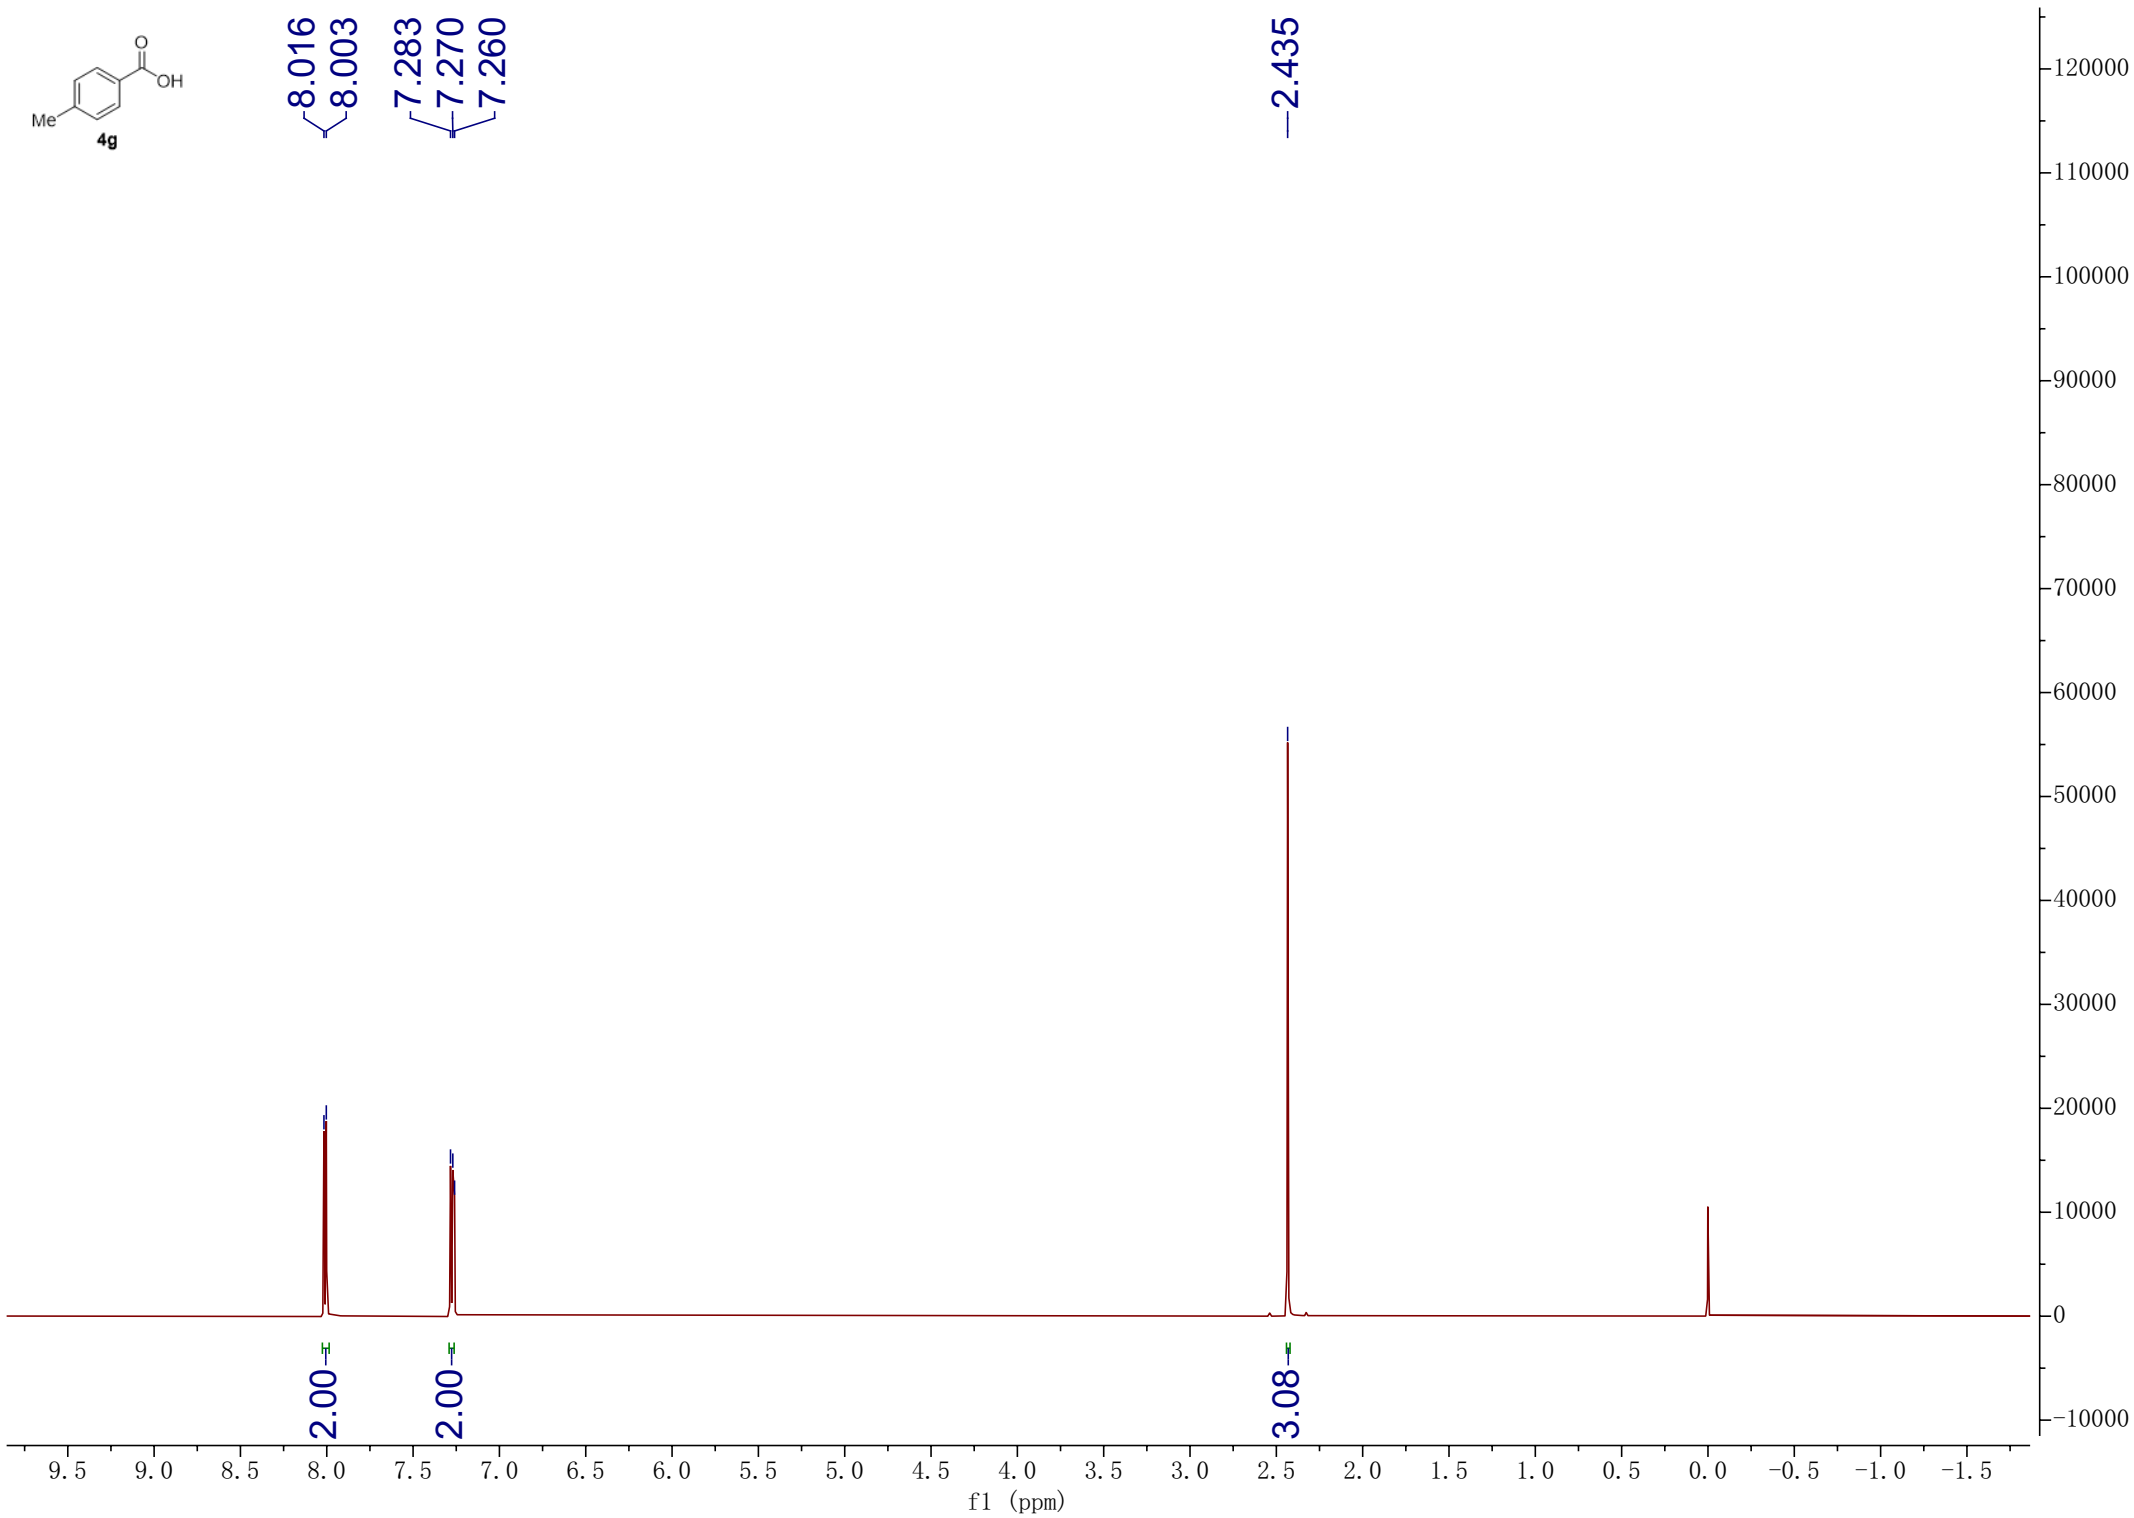

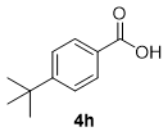

7.978  
7.963  
7.548  
7.534  
7.260

1.359

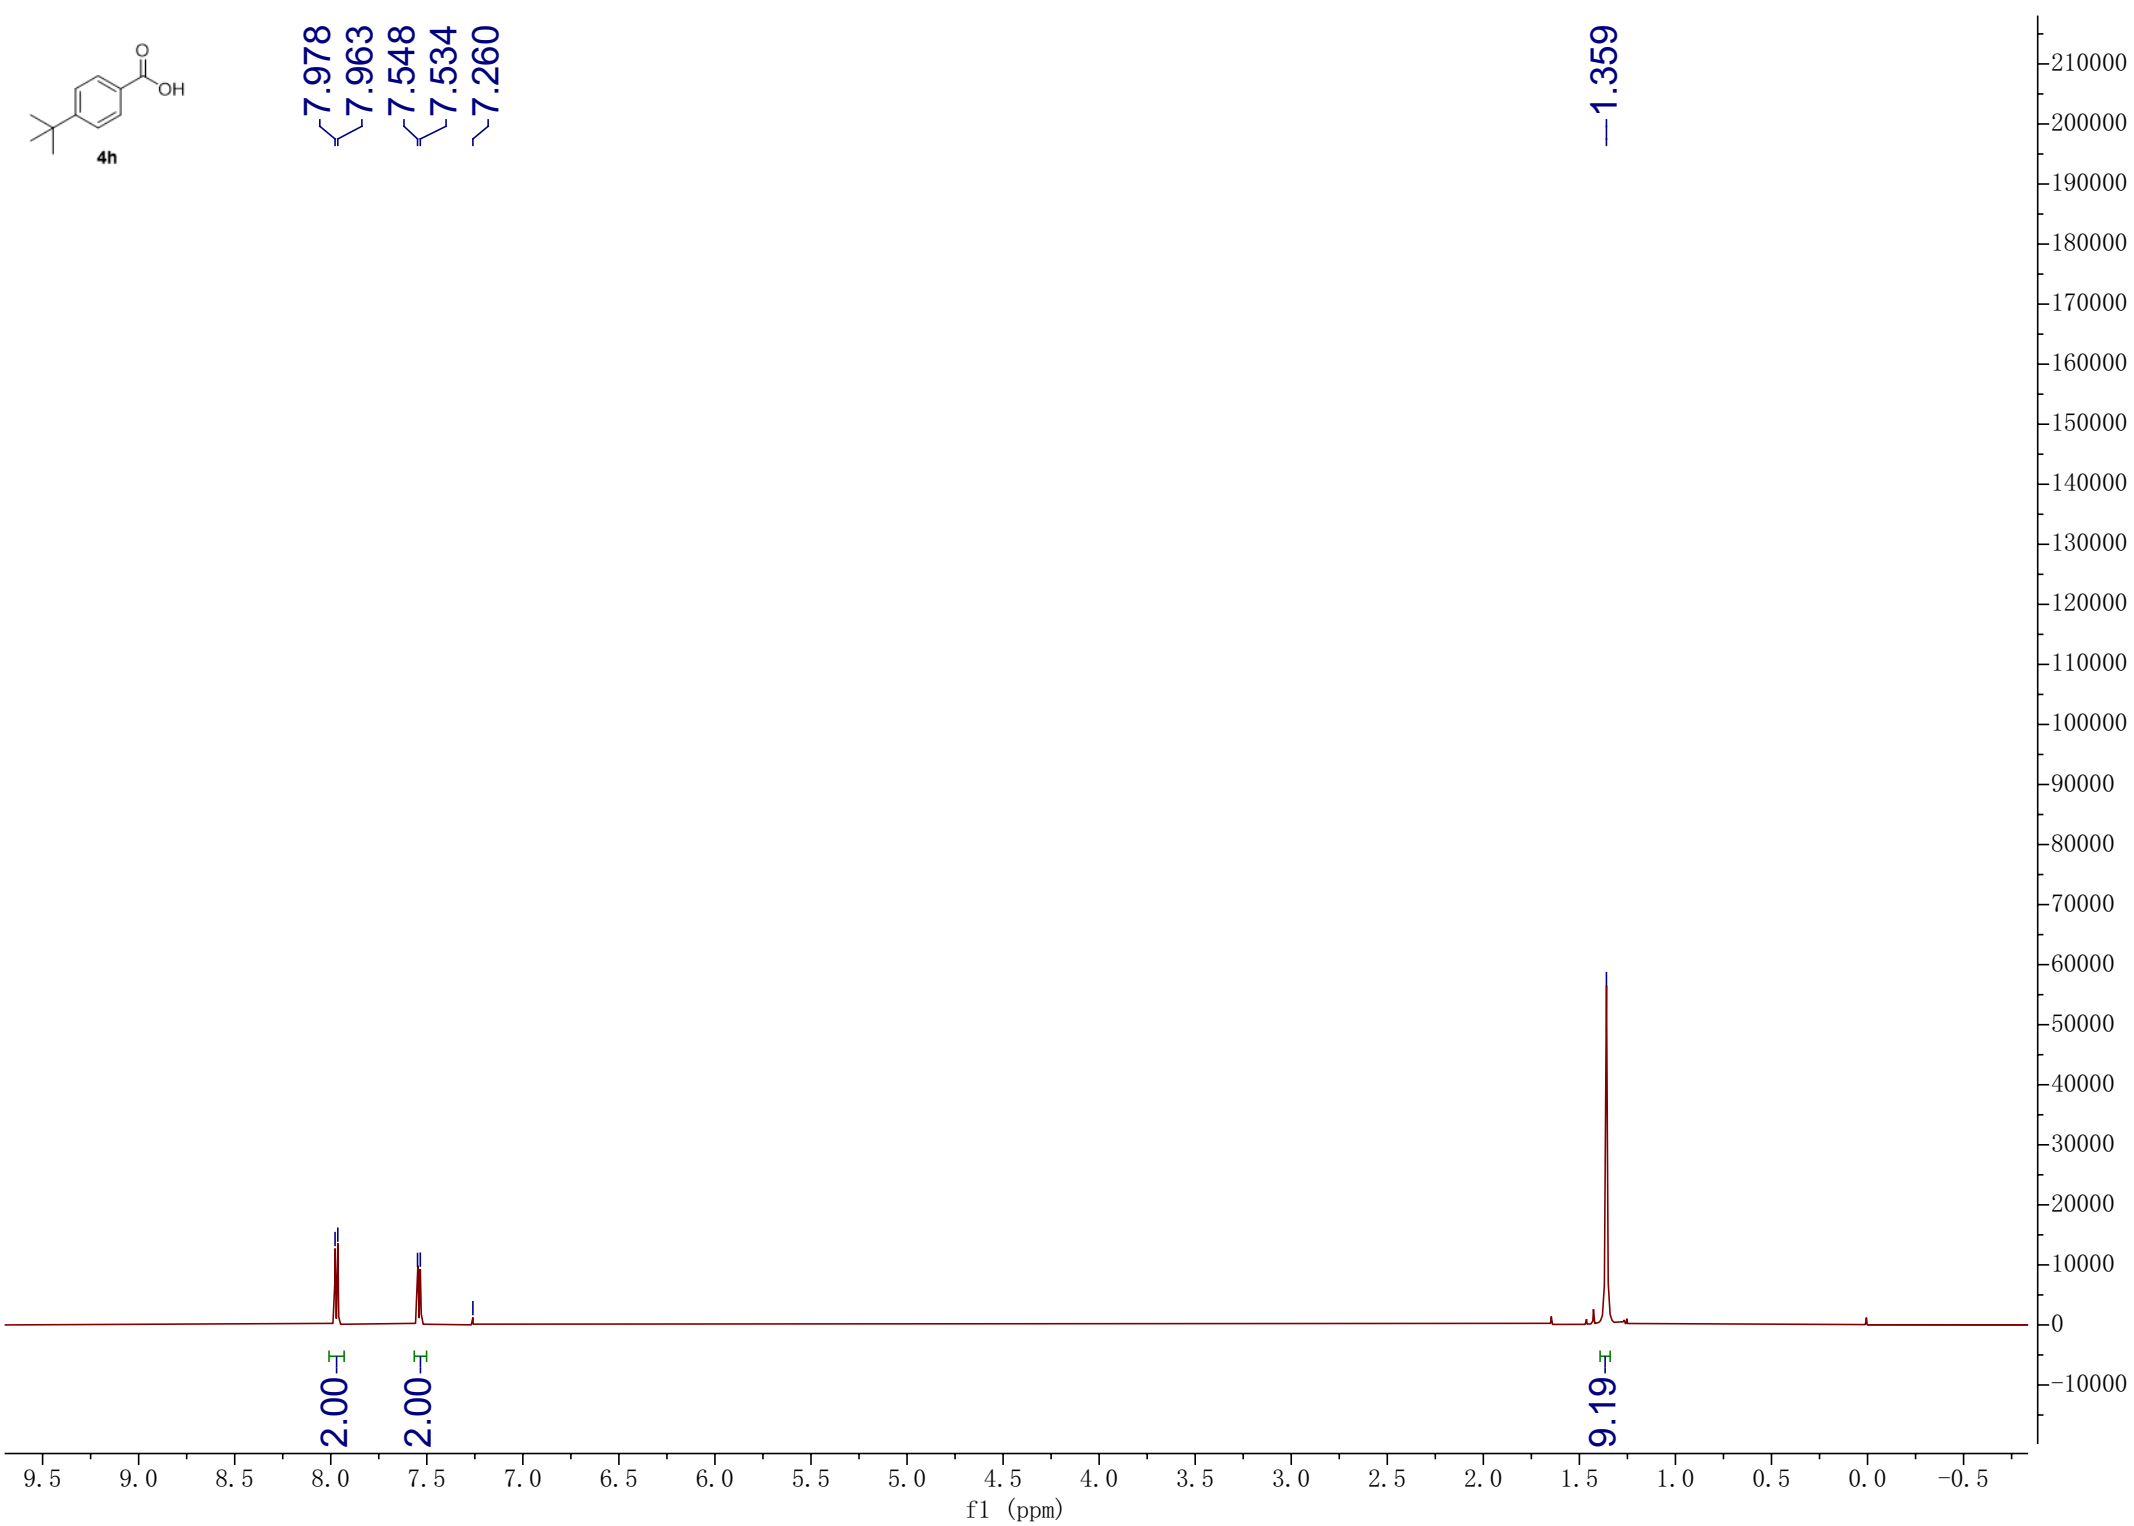

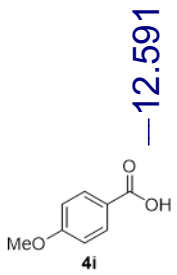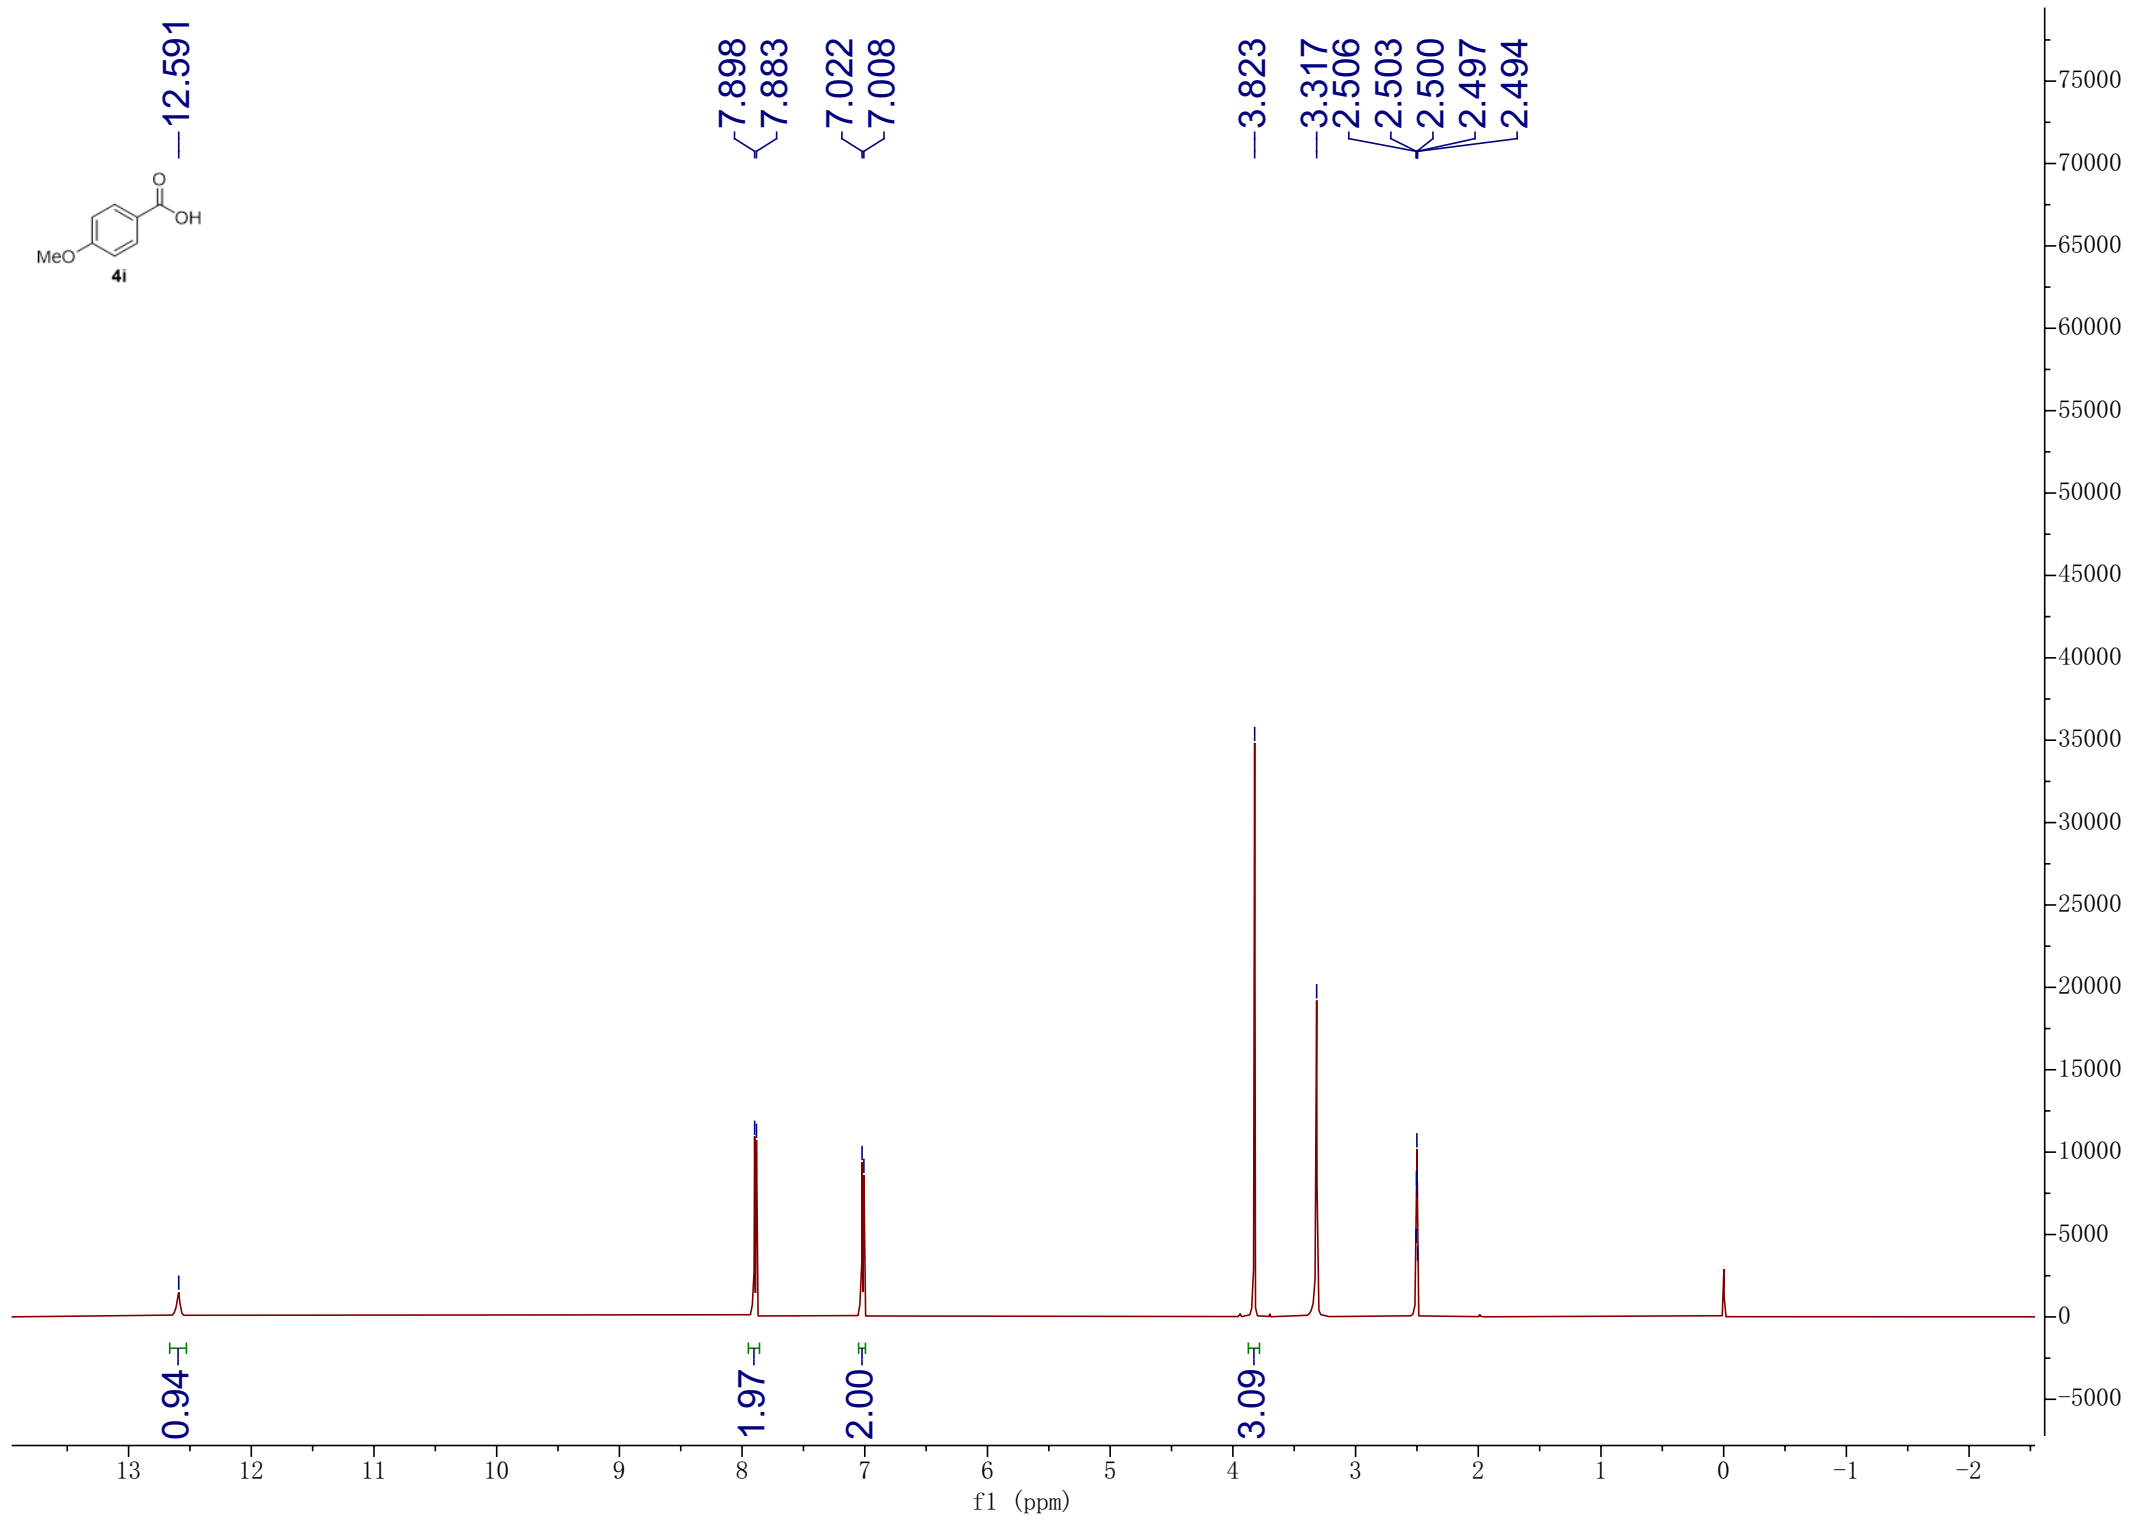

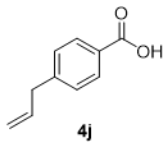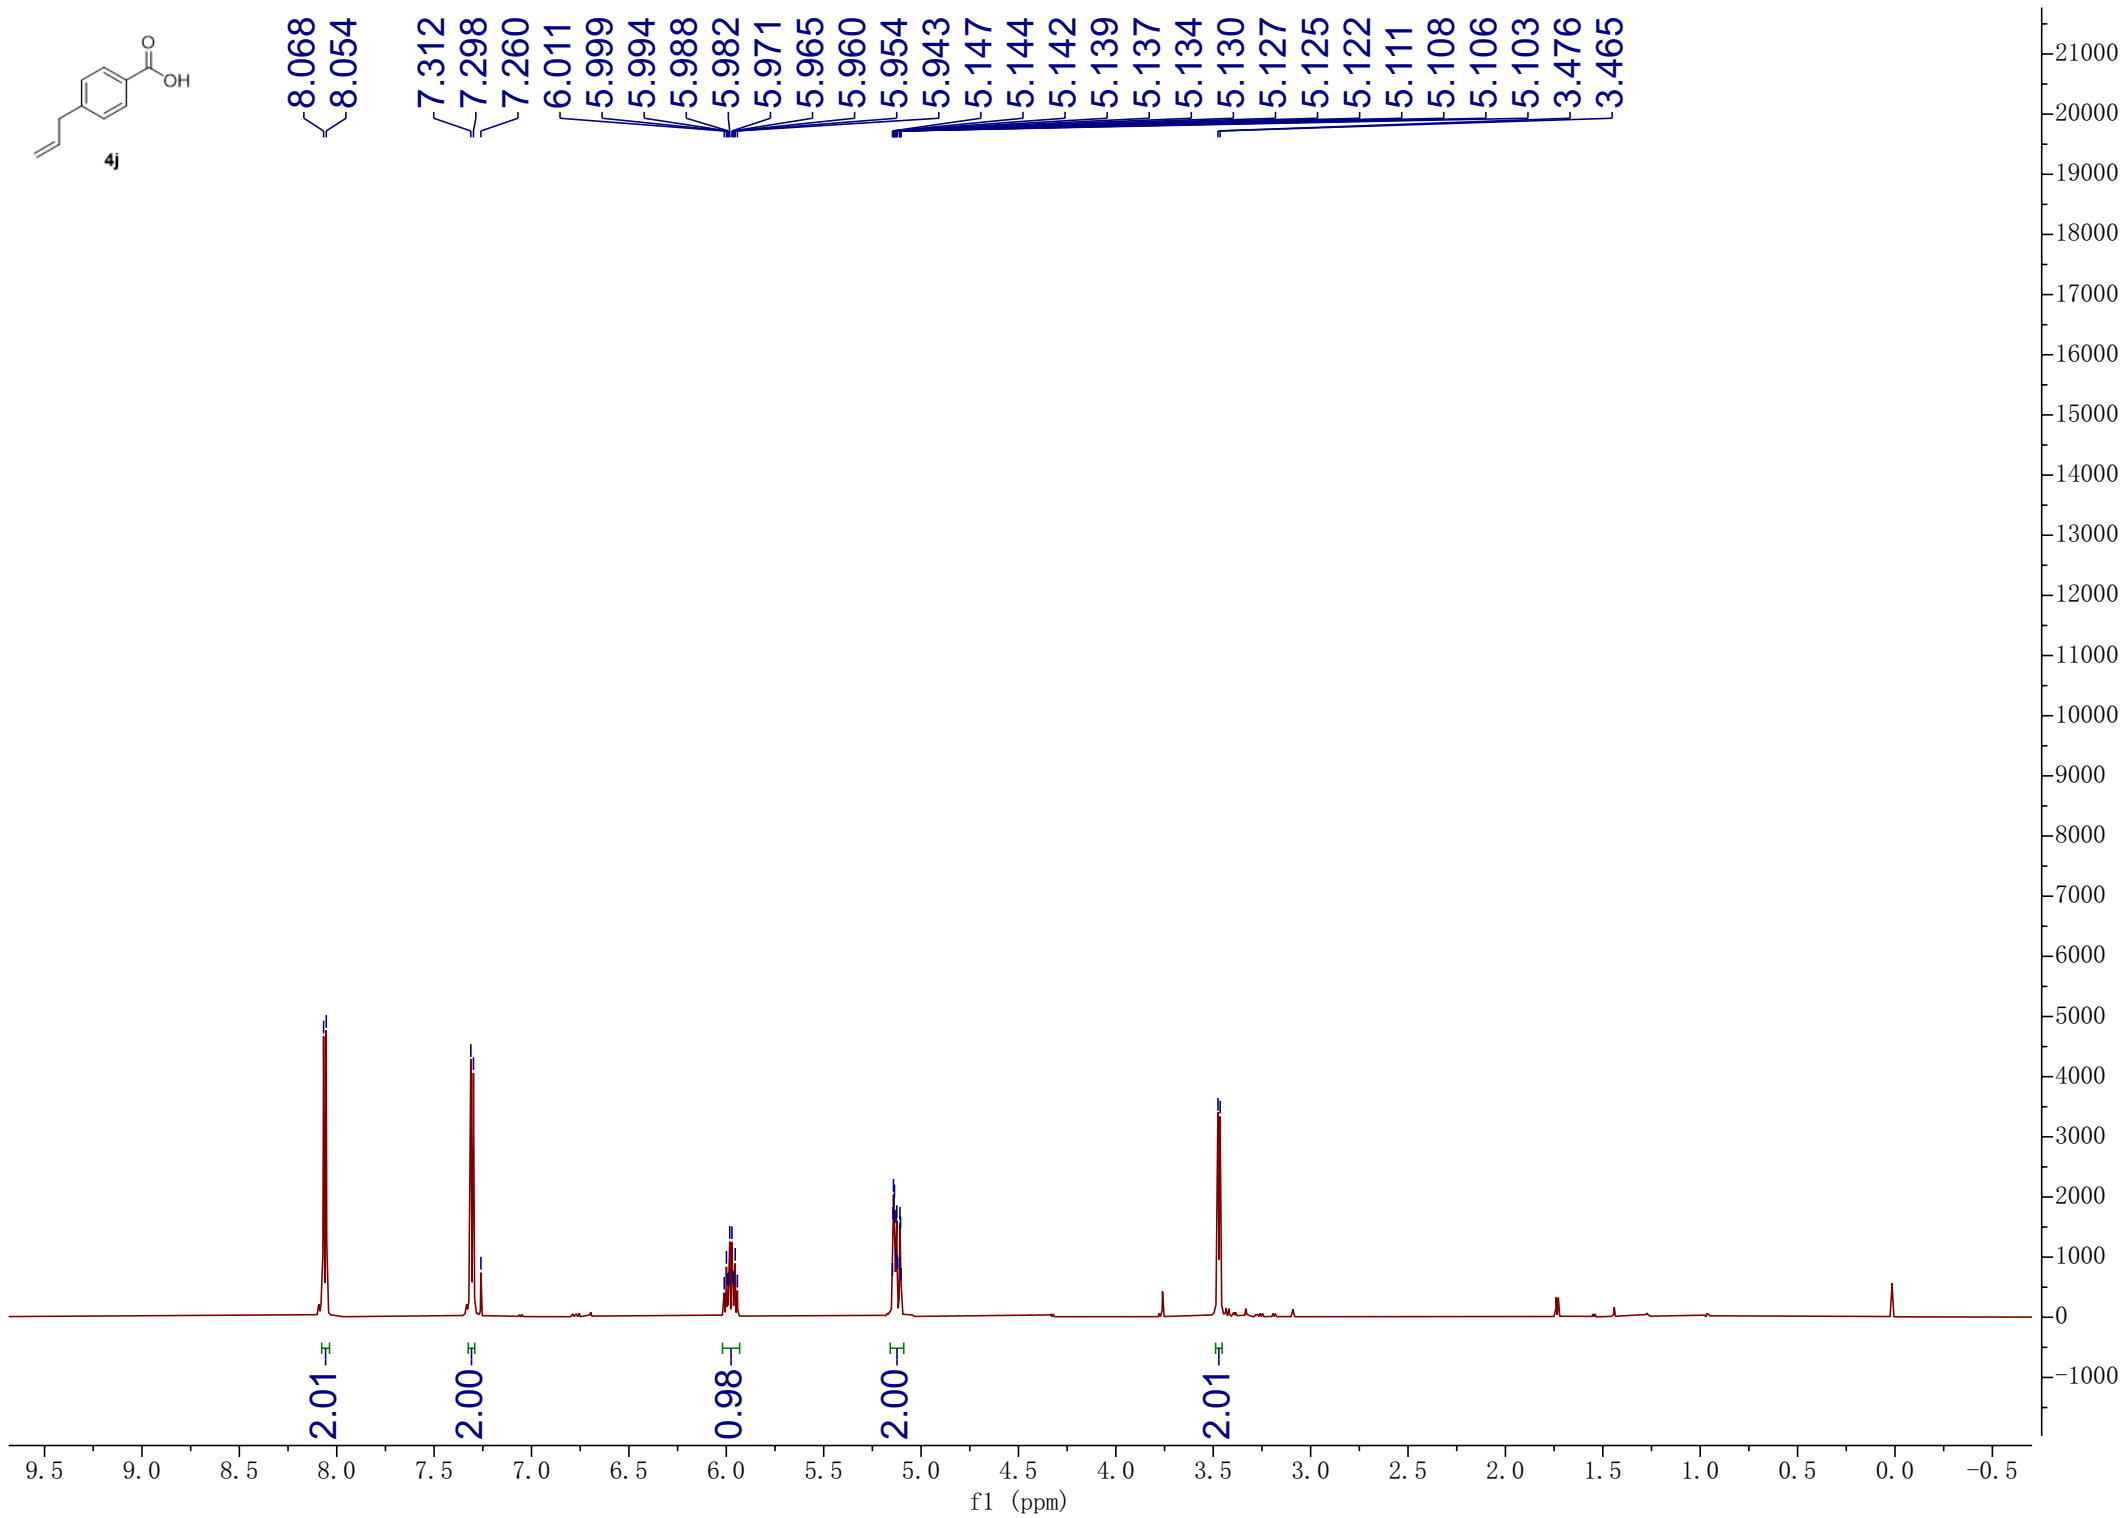

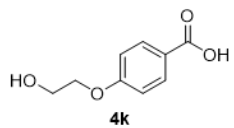

—12.562

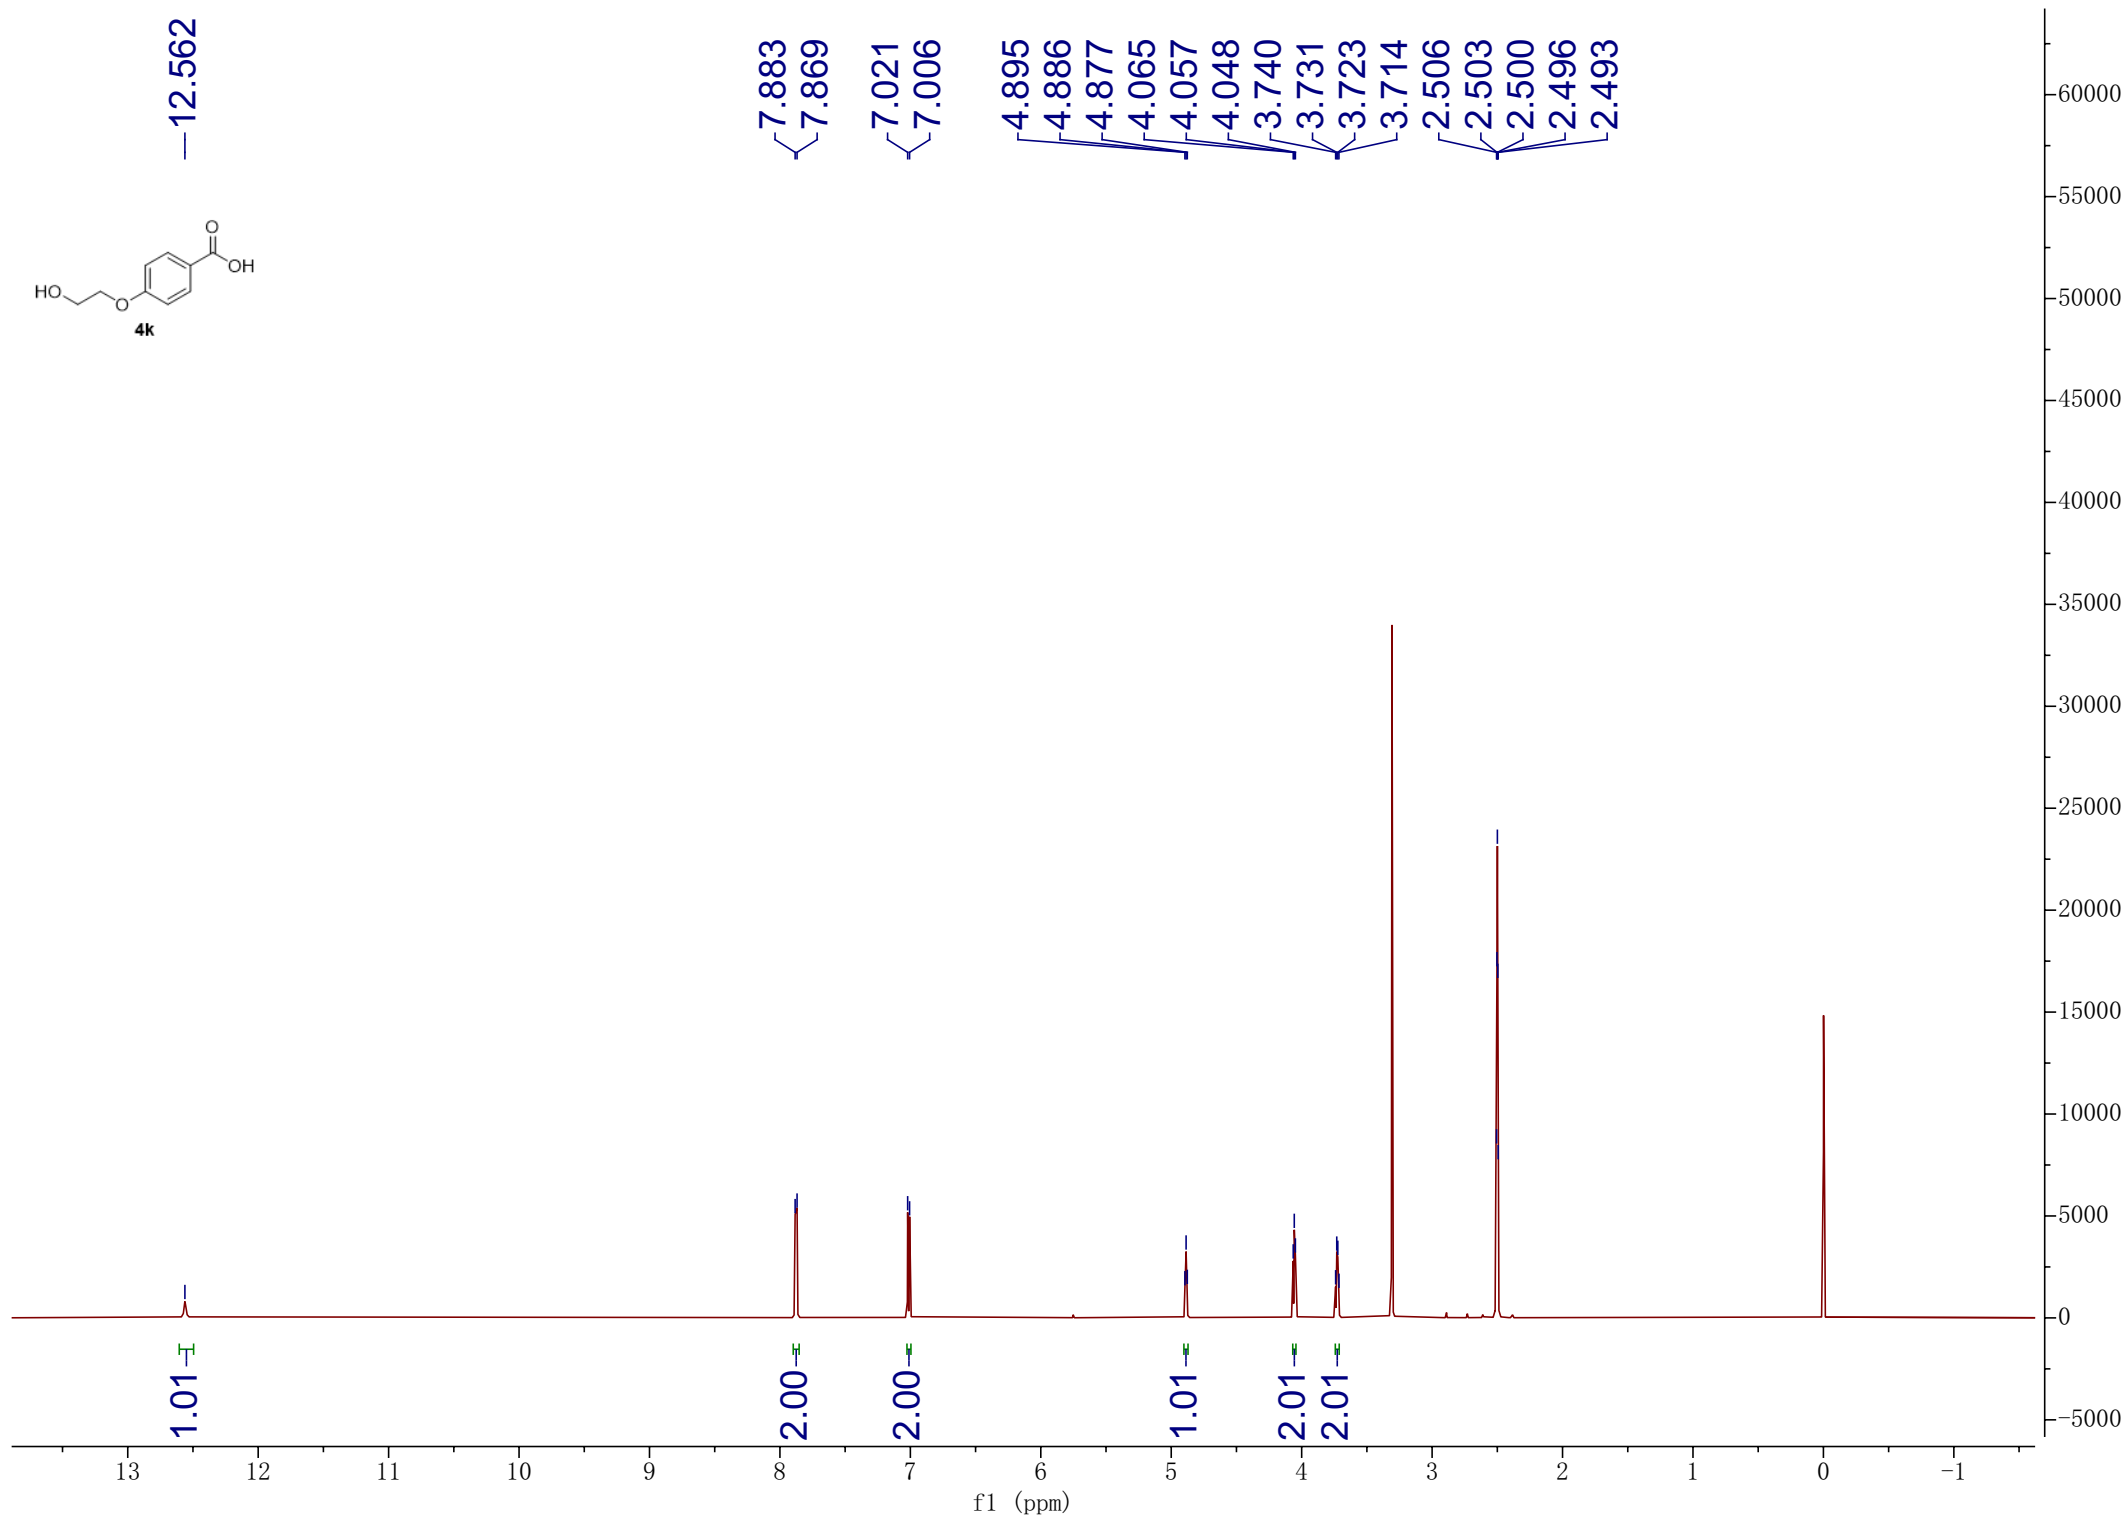

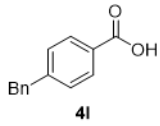

8.043  
8.029  
7.320  
7.308  
7.302  
7.295  
7.288  
7.260  
7.241  
7.229  
7.217  
7.194  
7.182

4.057

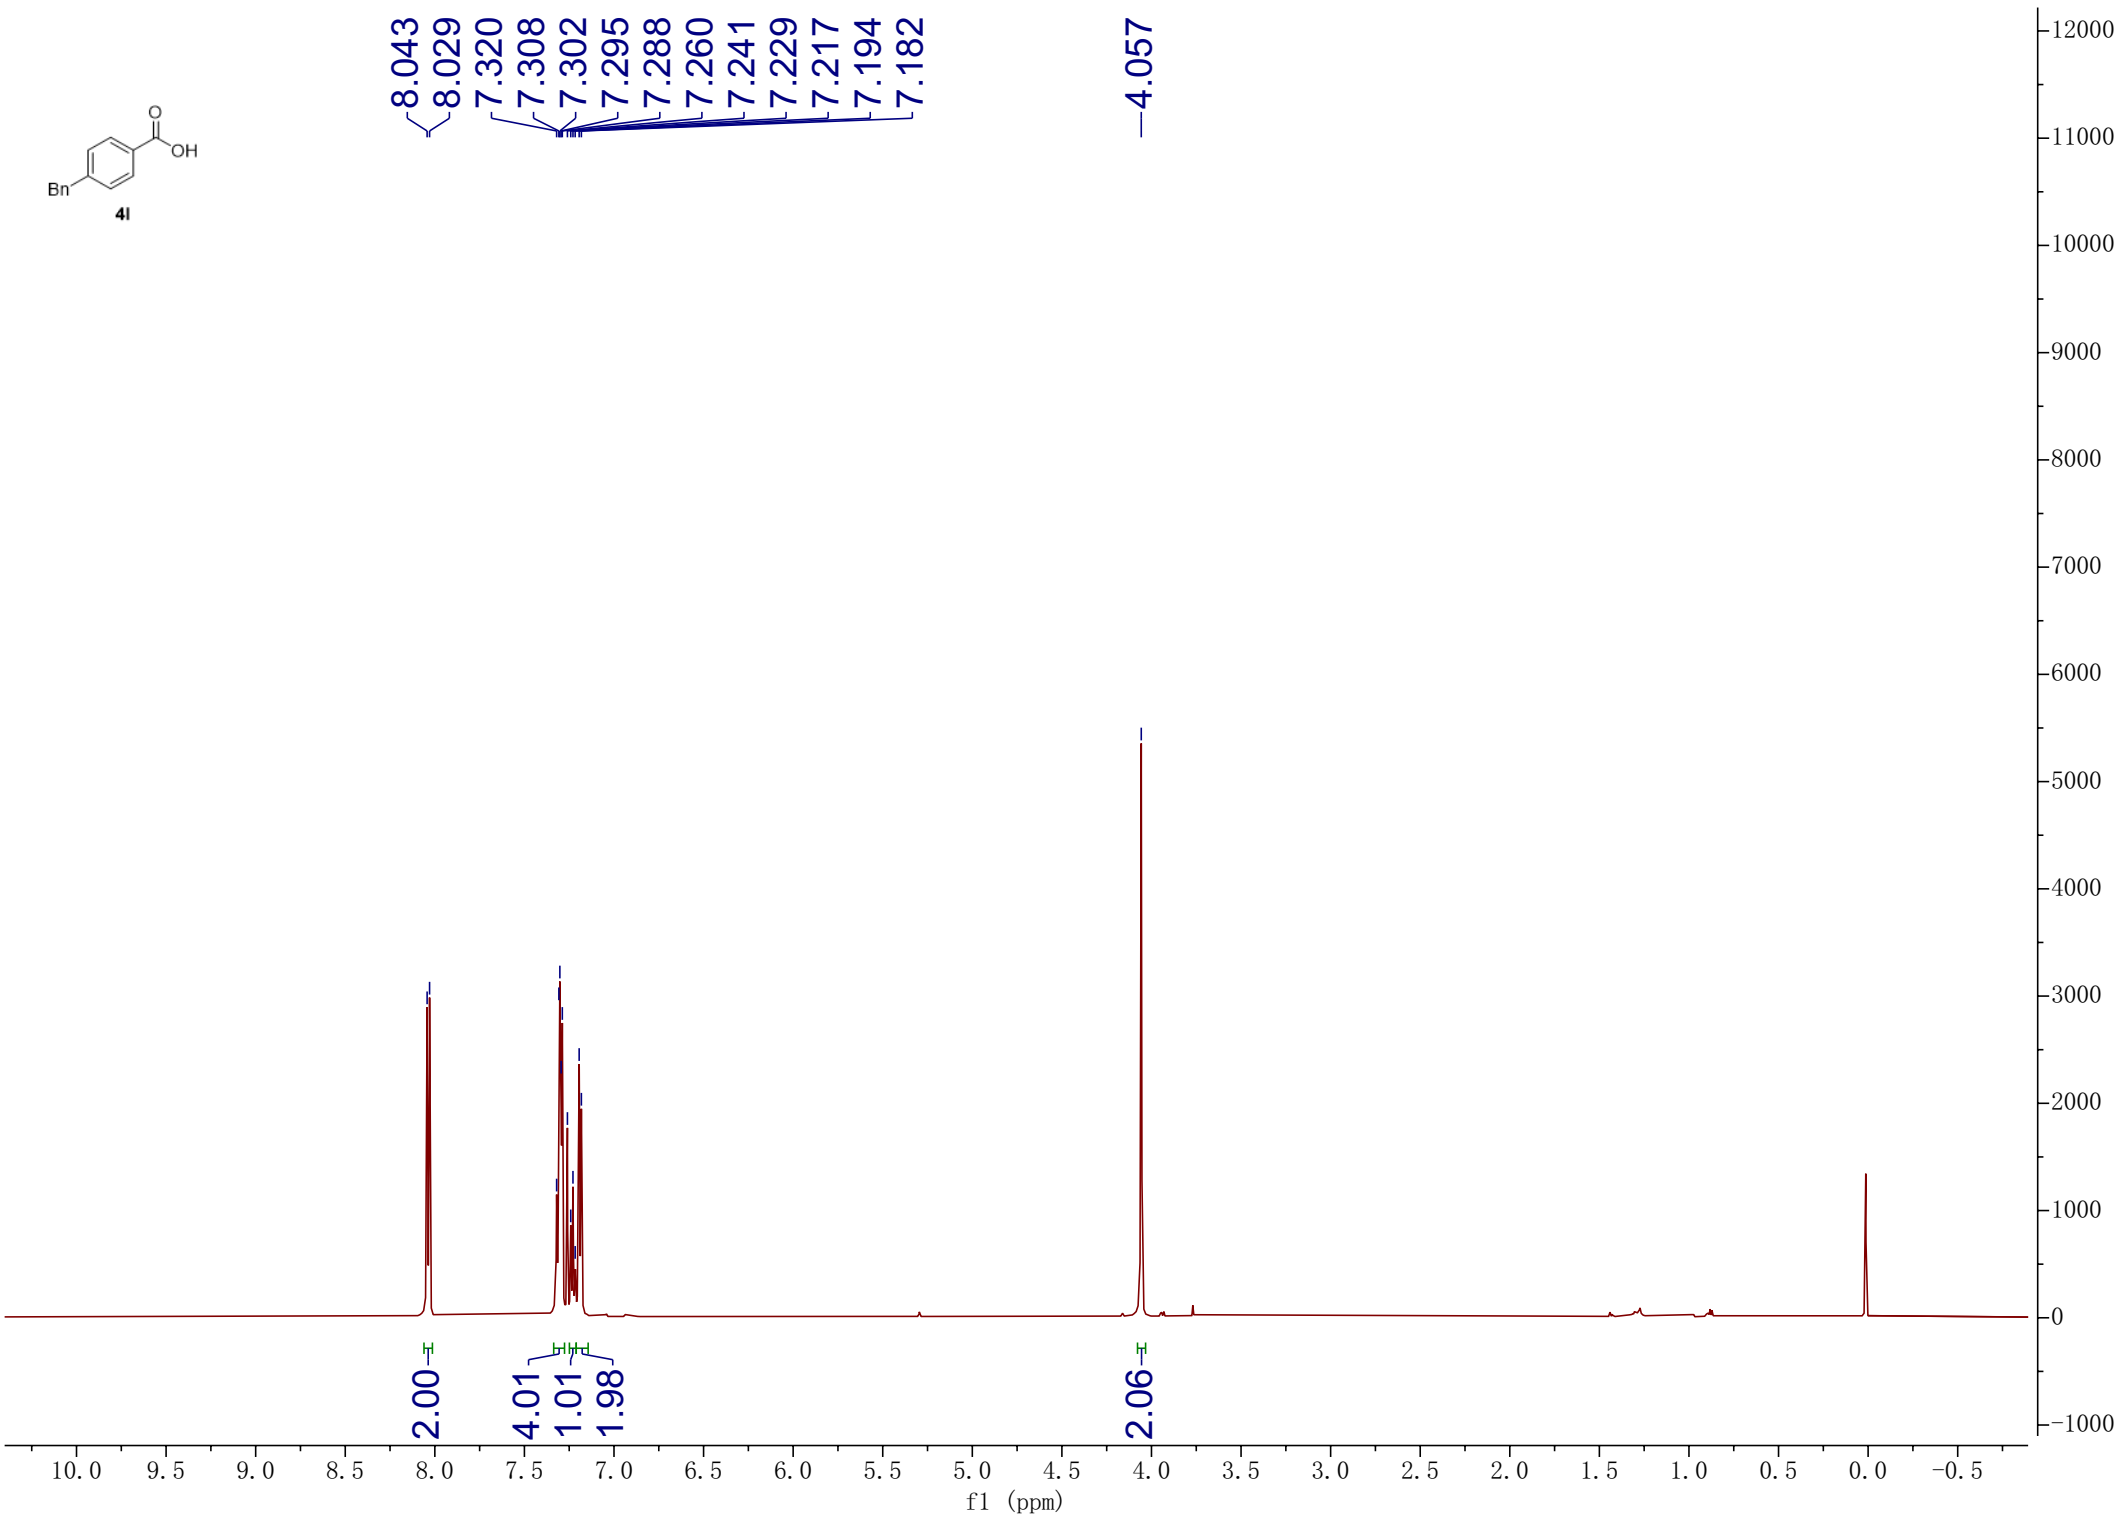

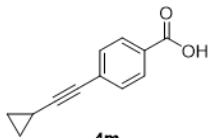

4m

13.024

0.93

7.877  
7.863  
7.461  
7.447

2.500  
1.590  
1.584  
1.582  
1.576  
1.568  
1.562  
0.933  
0.926  
0.921  
0.914  
0.912  
0.907  
0.901  
0.780  
0.773  
0.769  
0.765  
0.761  
0.754

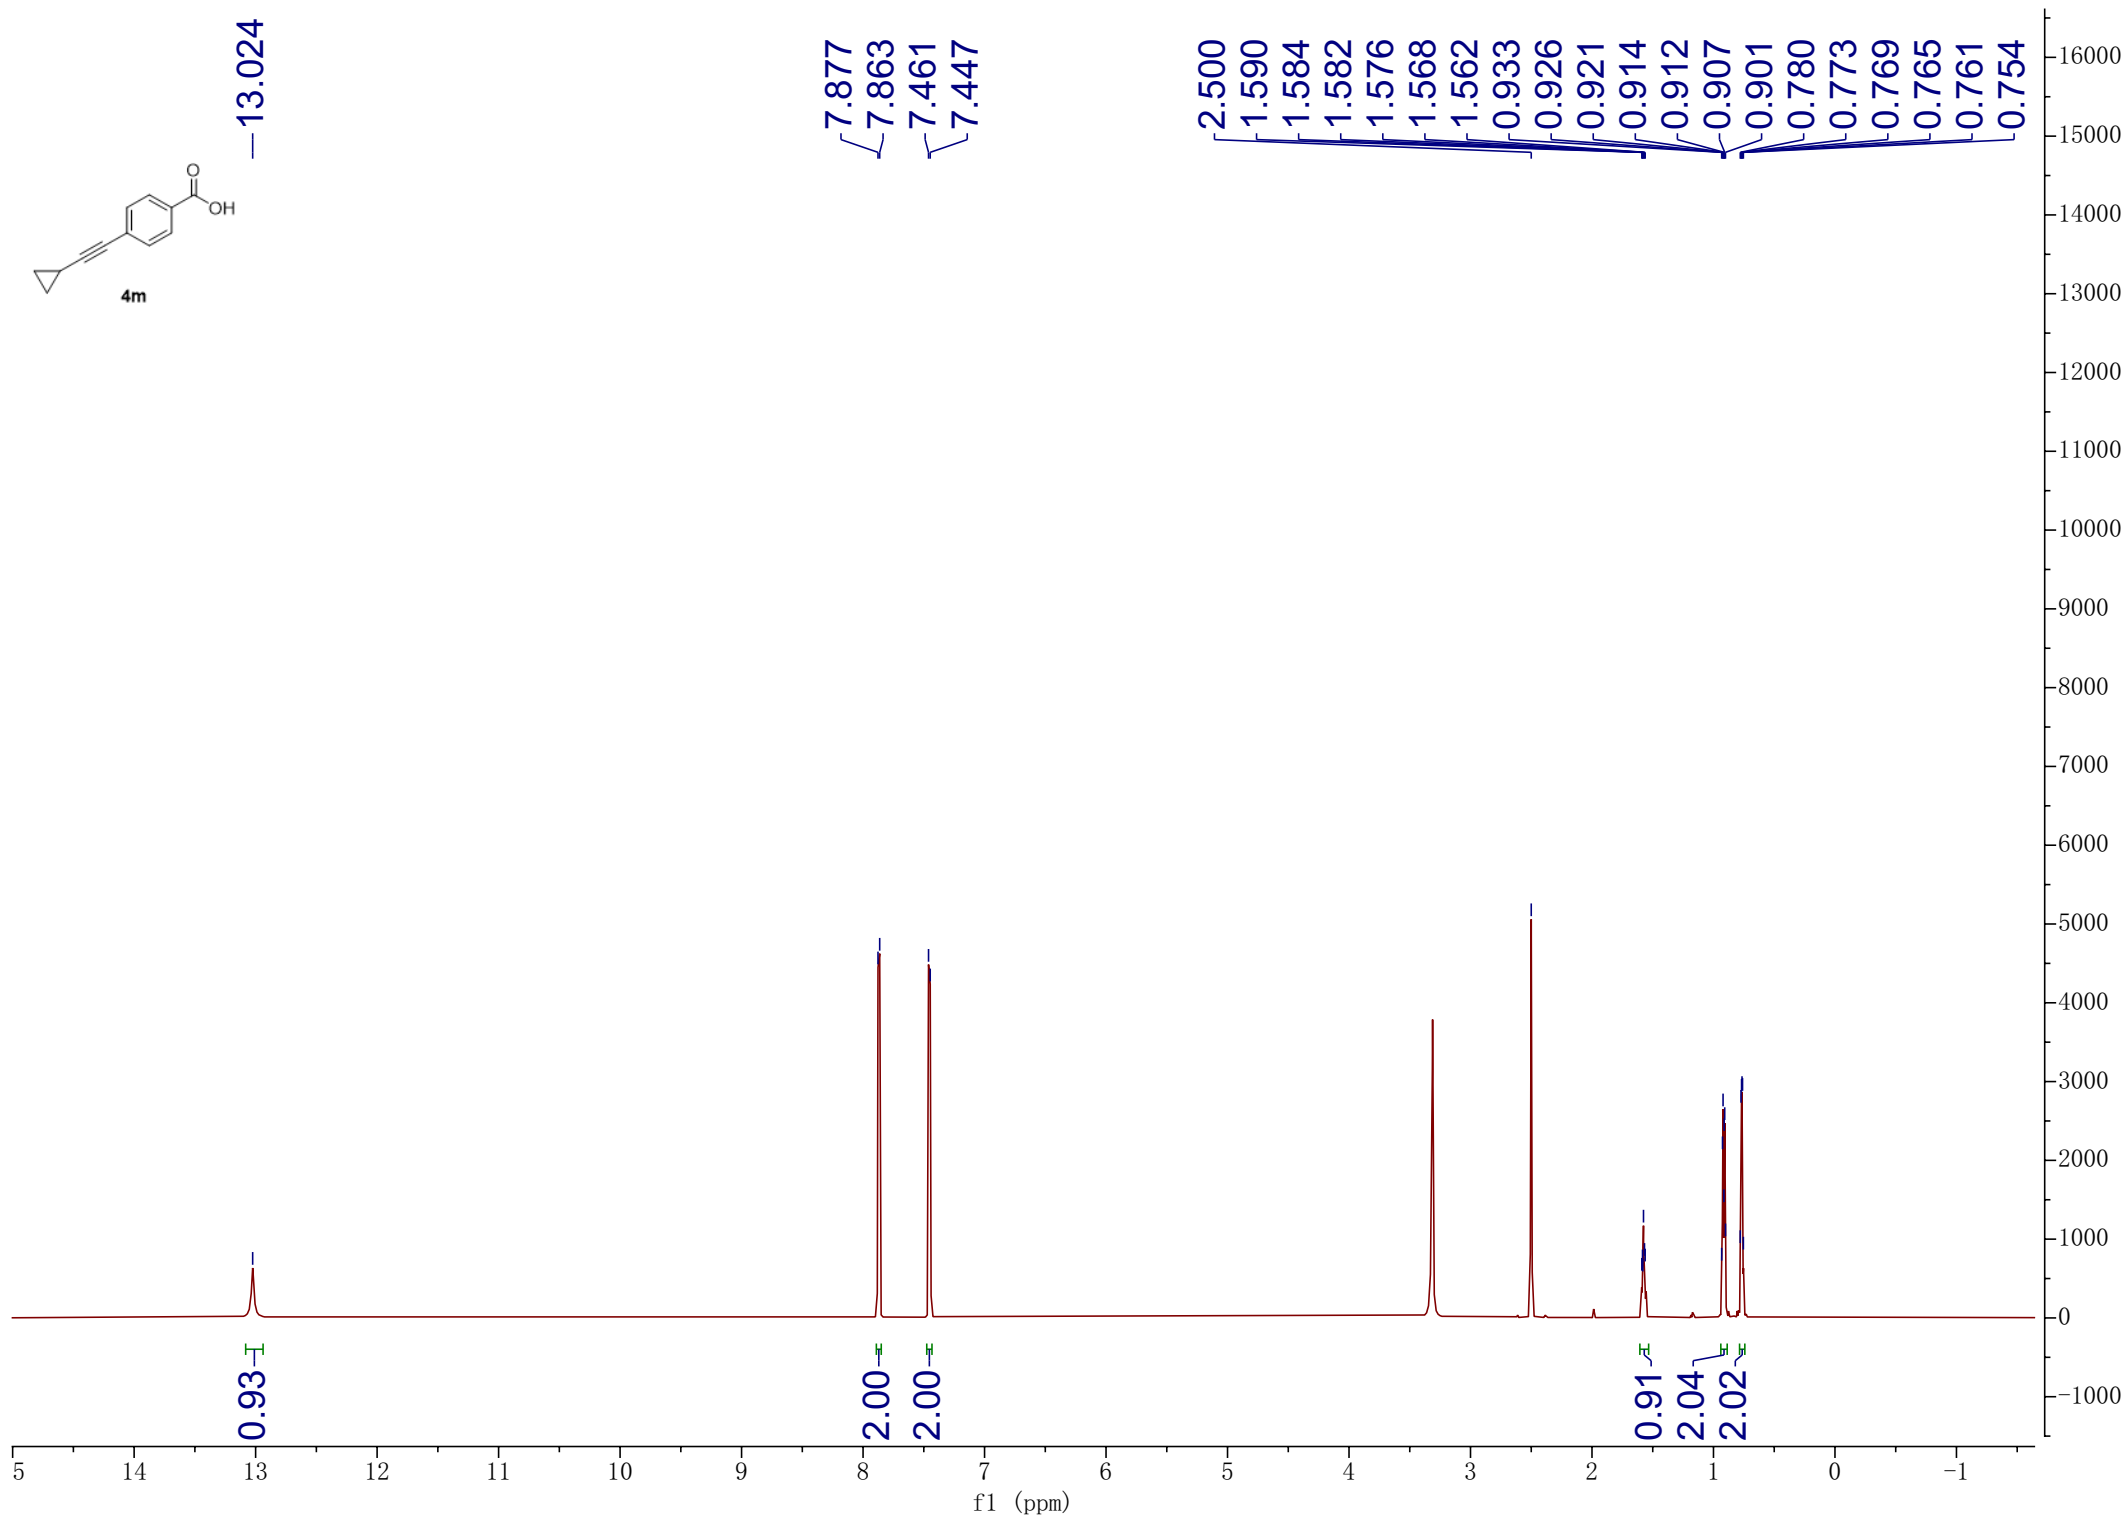



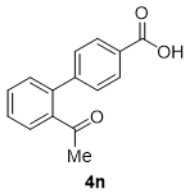

8.189  
8.168  
7.631  
7.612  
7.575  
7.557  
7.538  
7.494  
7.475  
7.467  
7.447  
7.412  
7.260

2.131

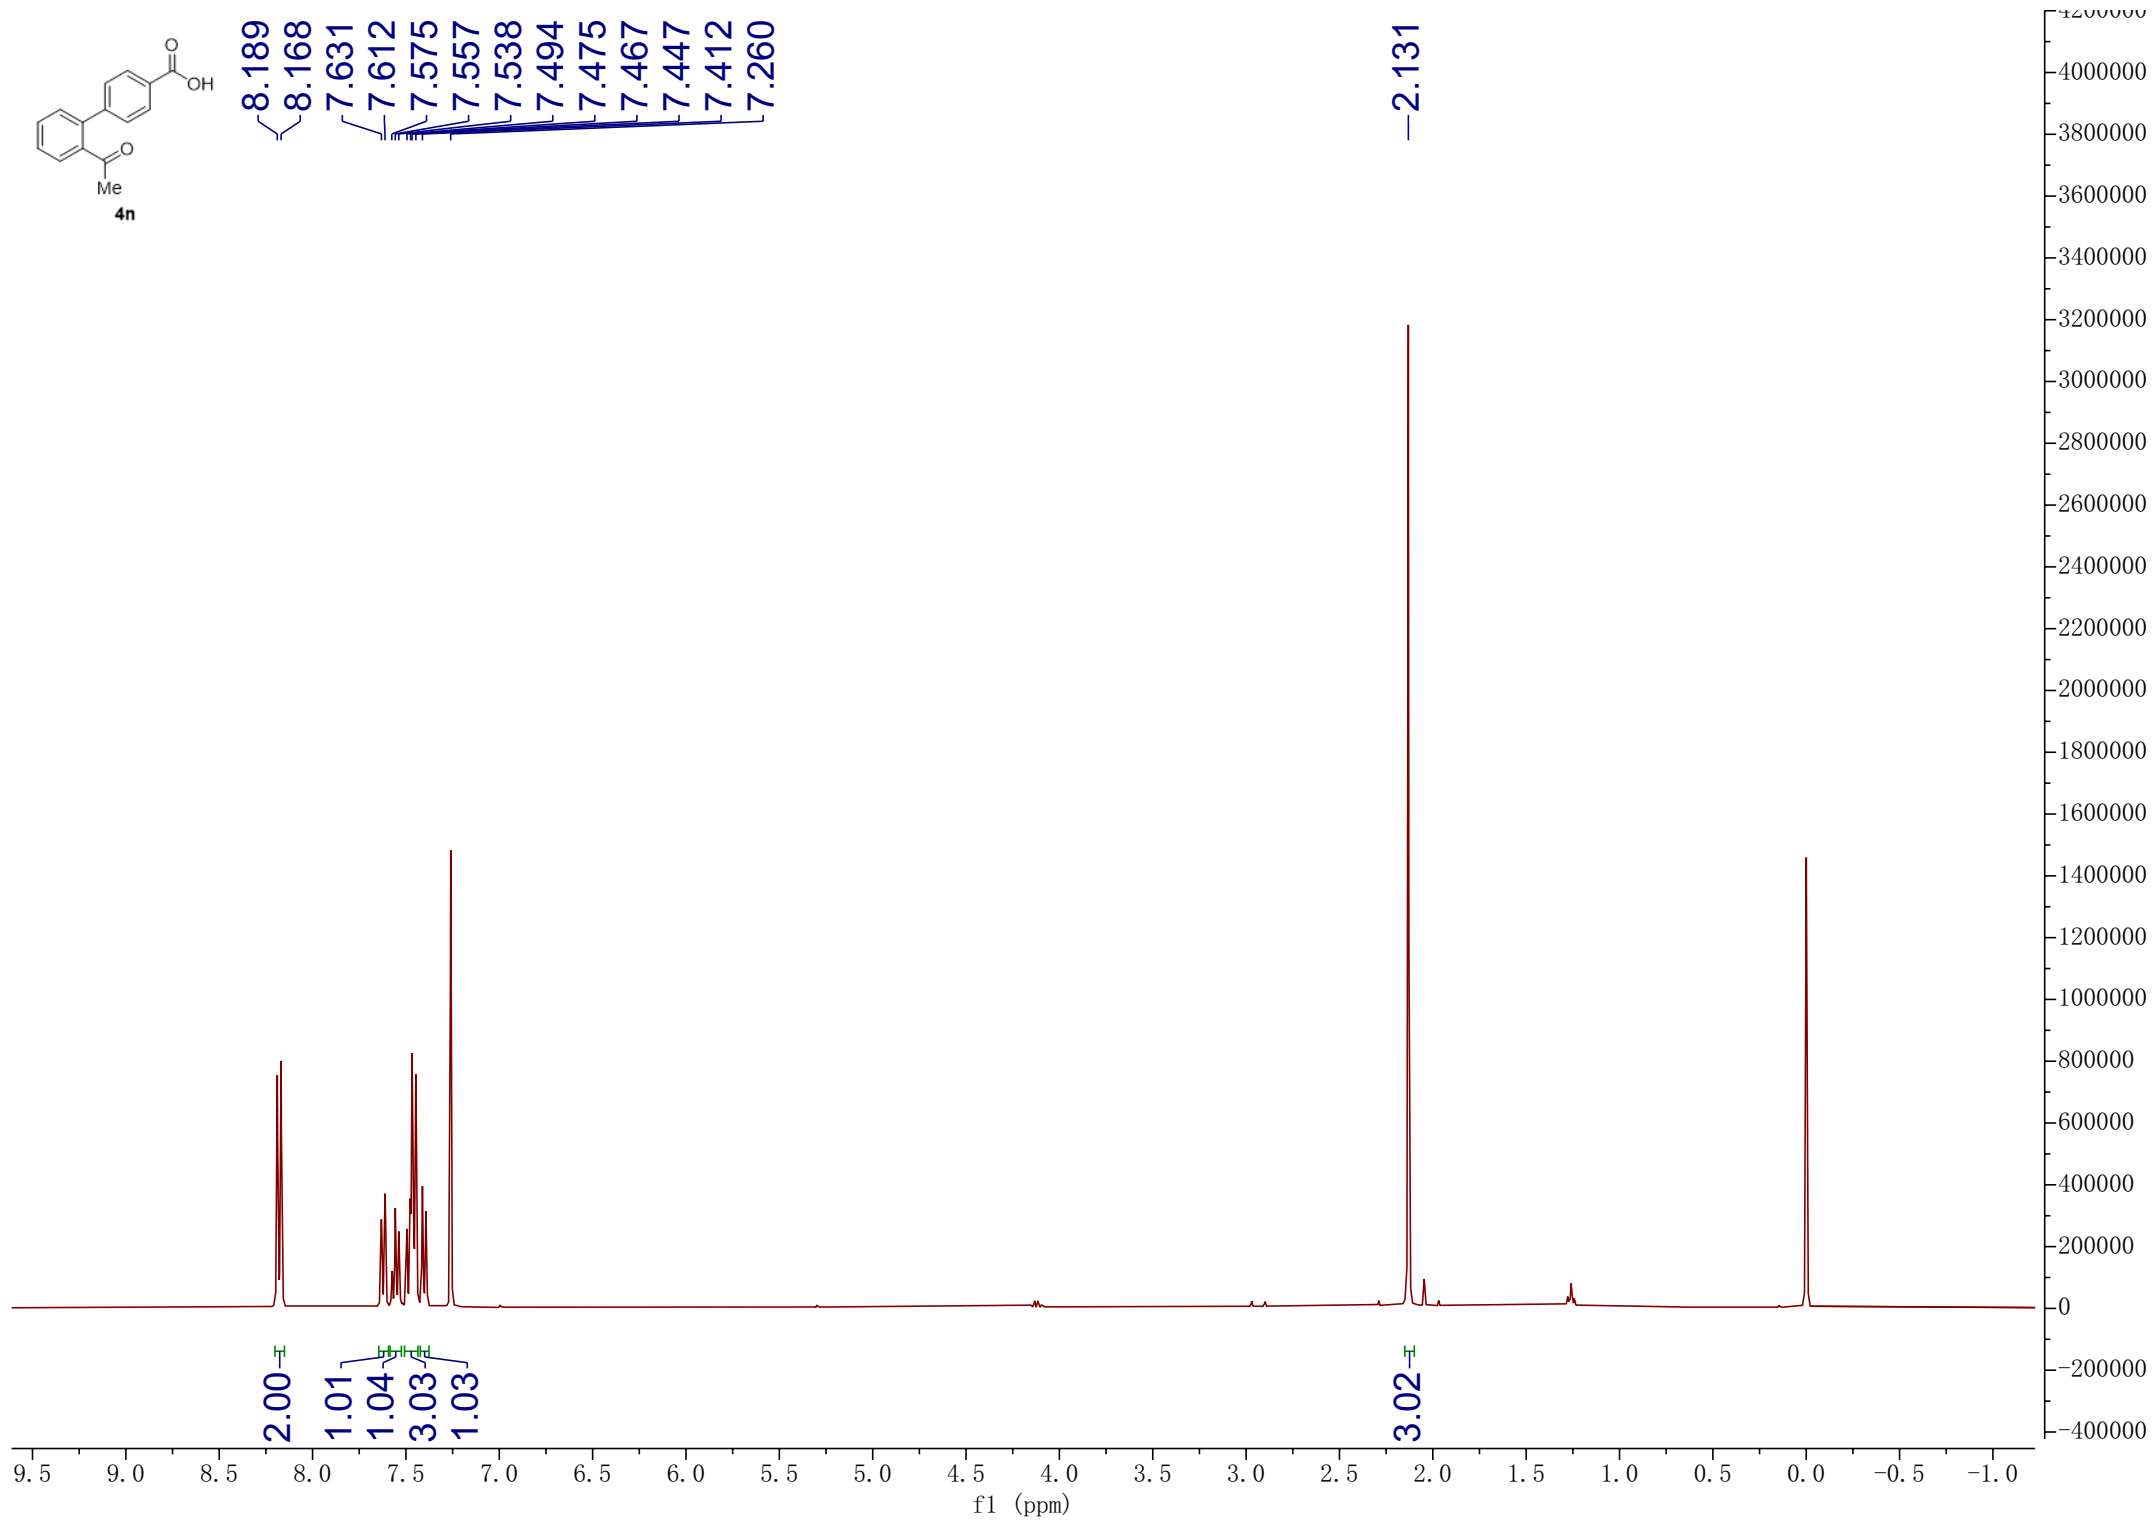

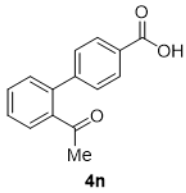

— 202.67

— 167.12

145.03  
140.01  
139.12  
131.05  
130.42  
129.79  
129.48  
128.86  
128.12  
128.05

40.15  
39.94  
39.73  
39.52  
39.31  
39.10  
38.89  
30.15

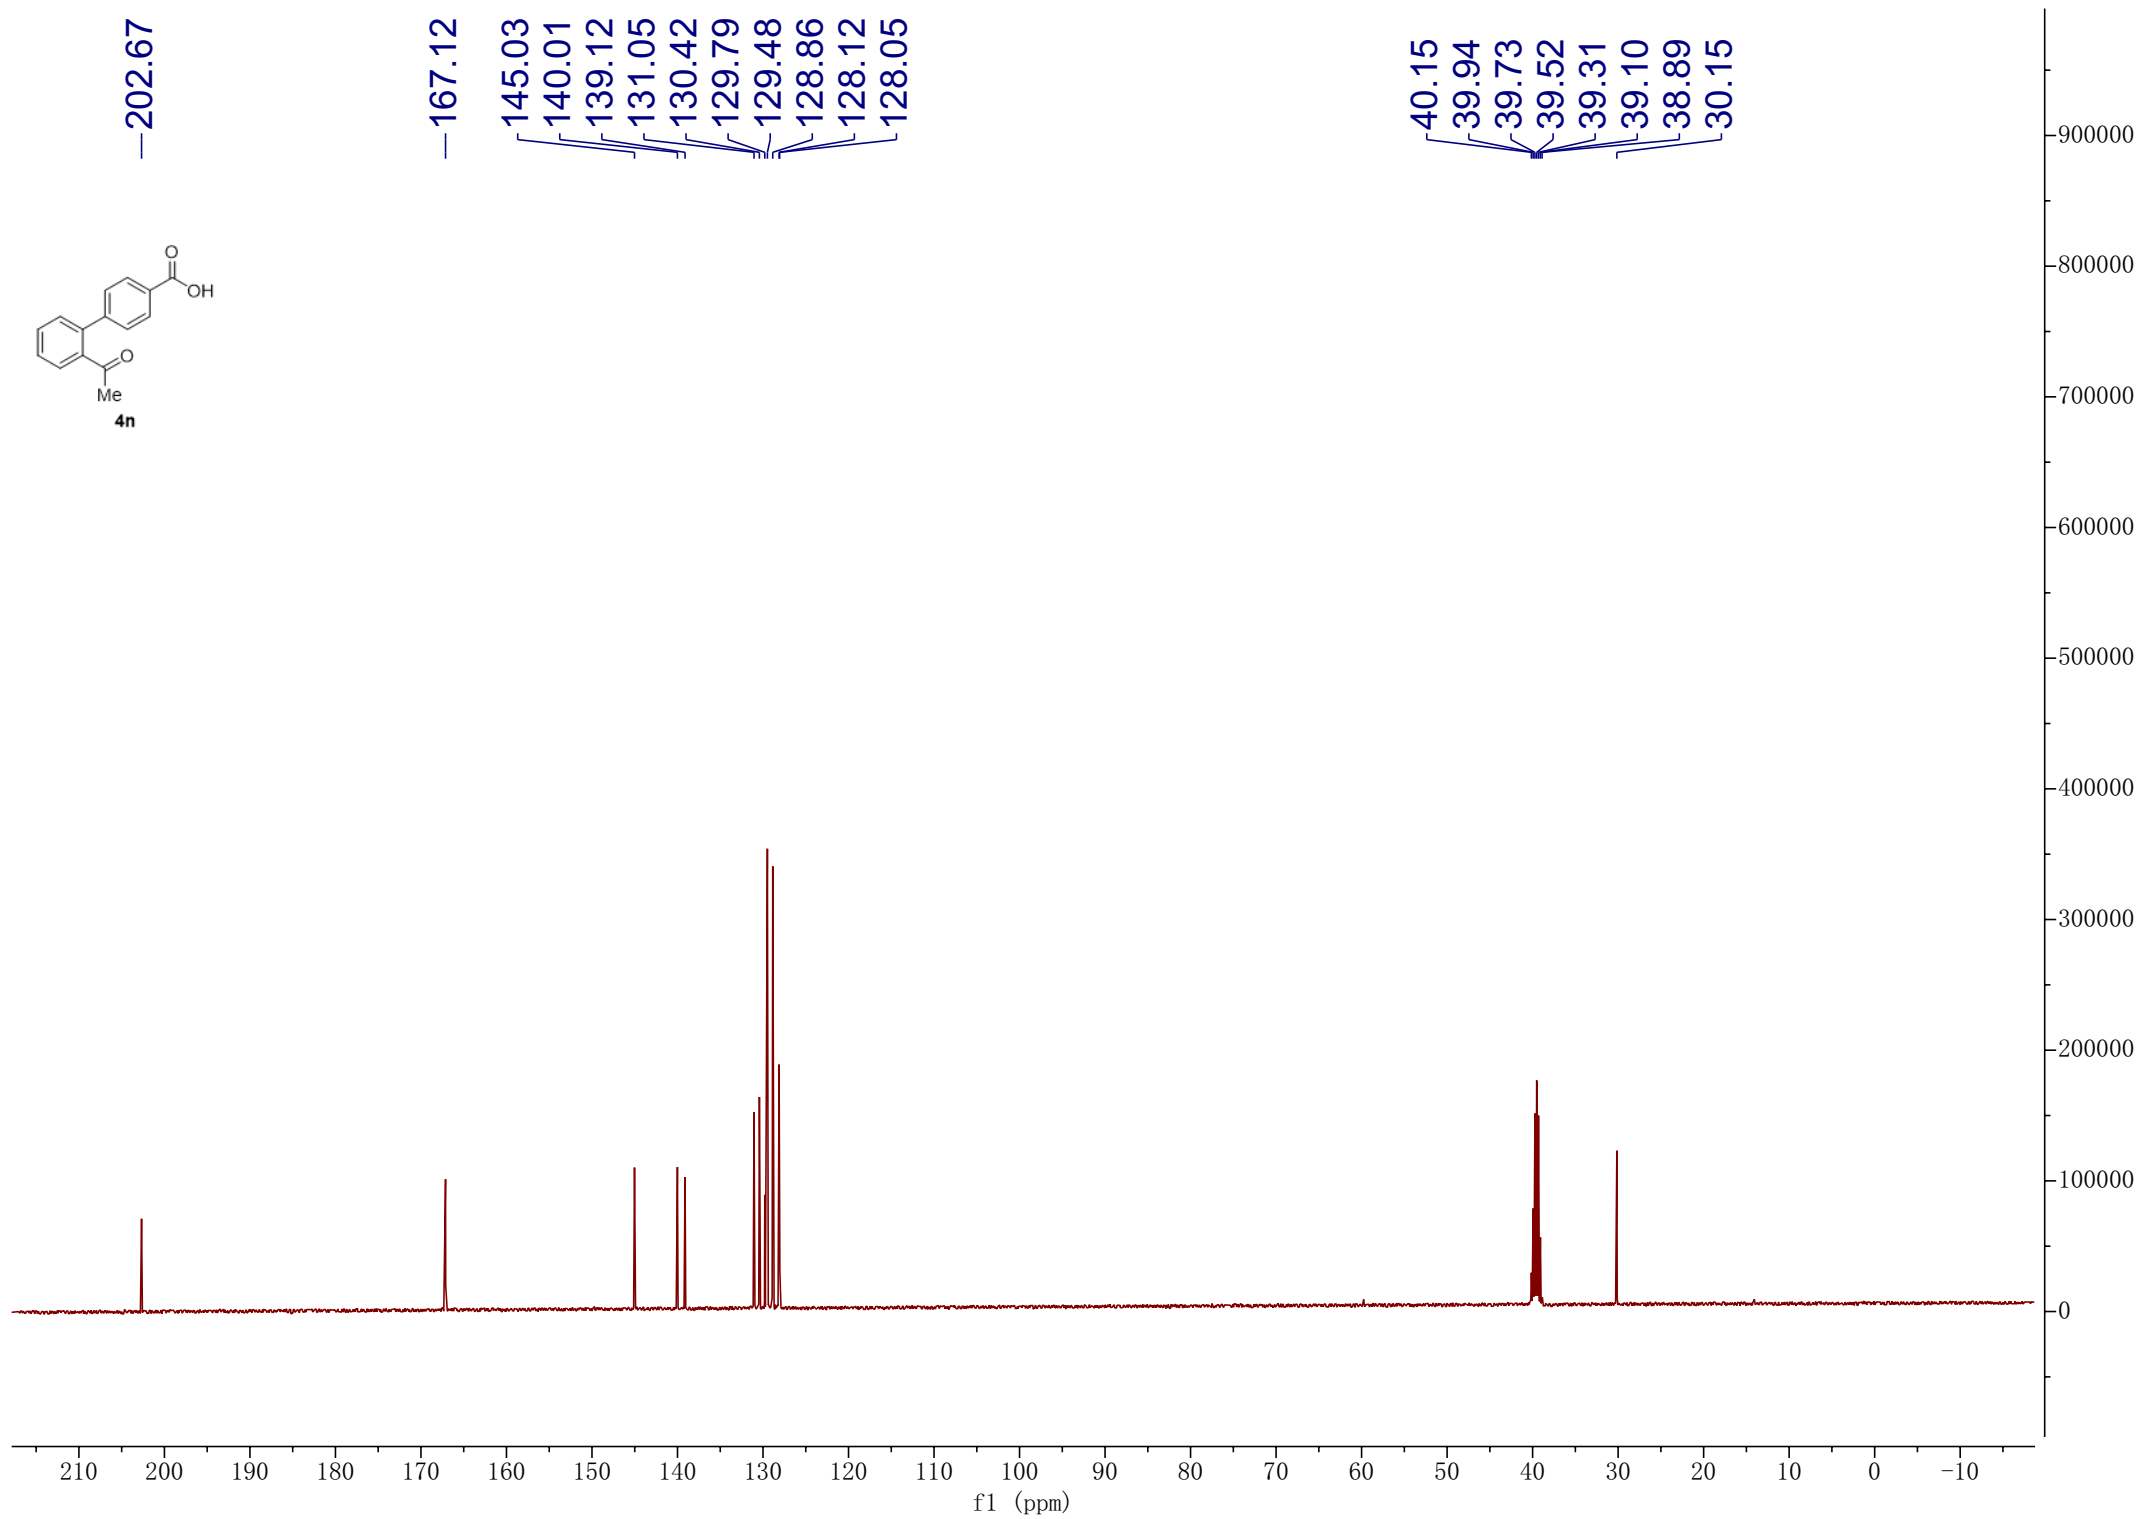

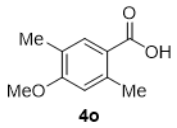

7.898

1.00

7.260

6.667

1.04

3.882

3.11

2.655

3.00

2.209

3.04

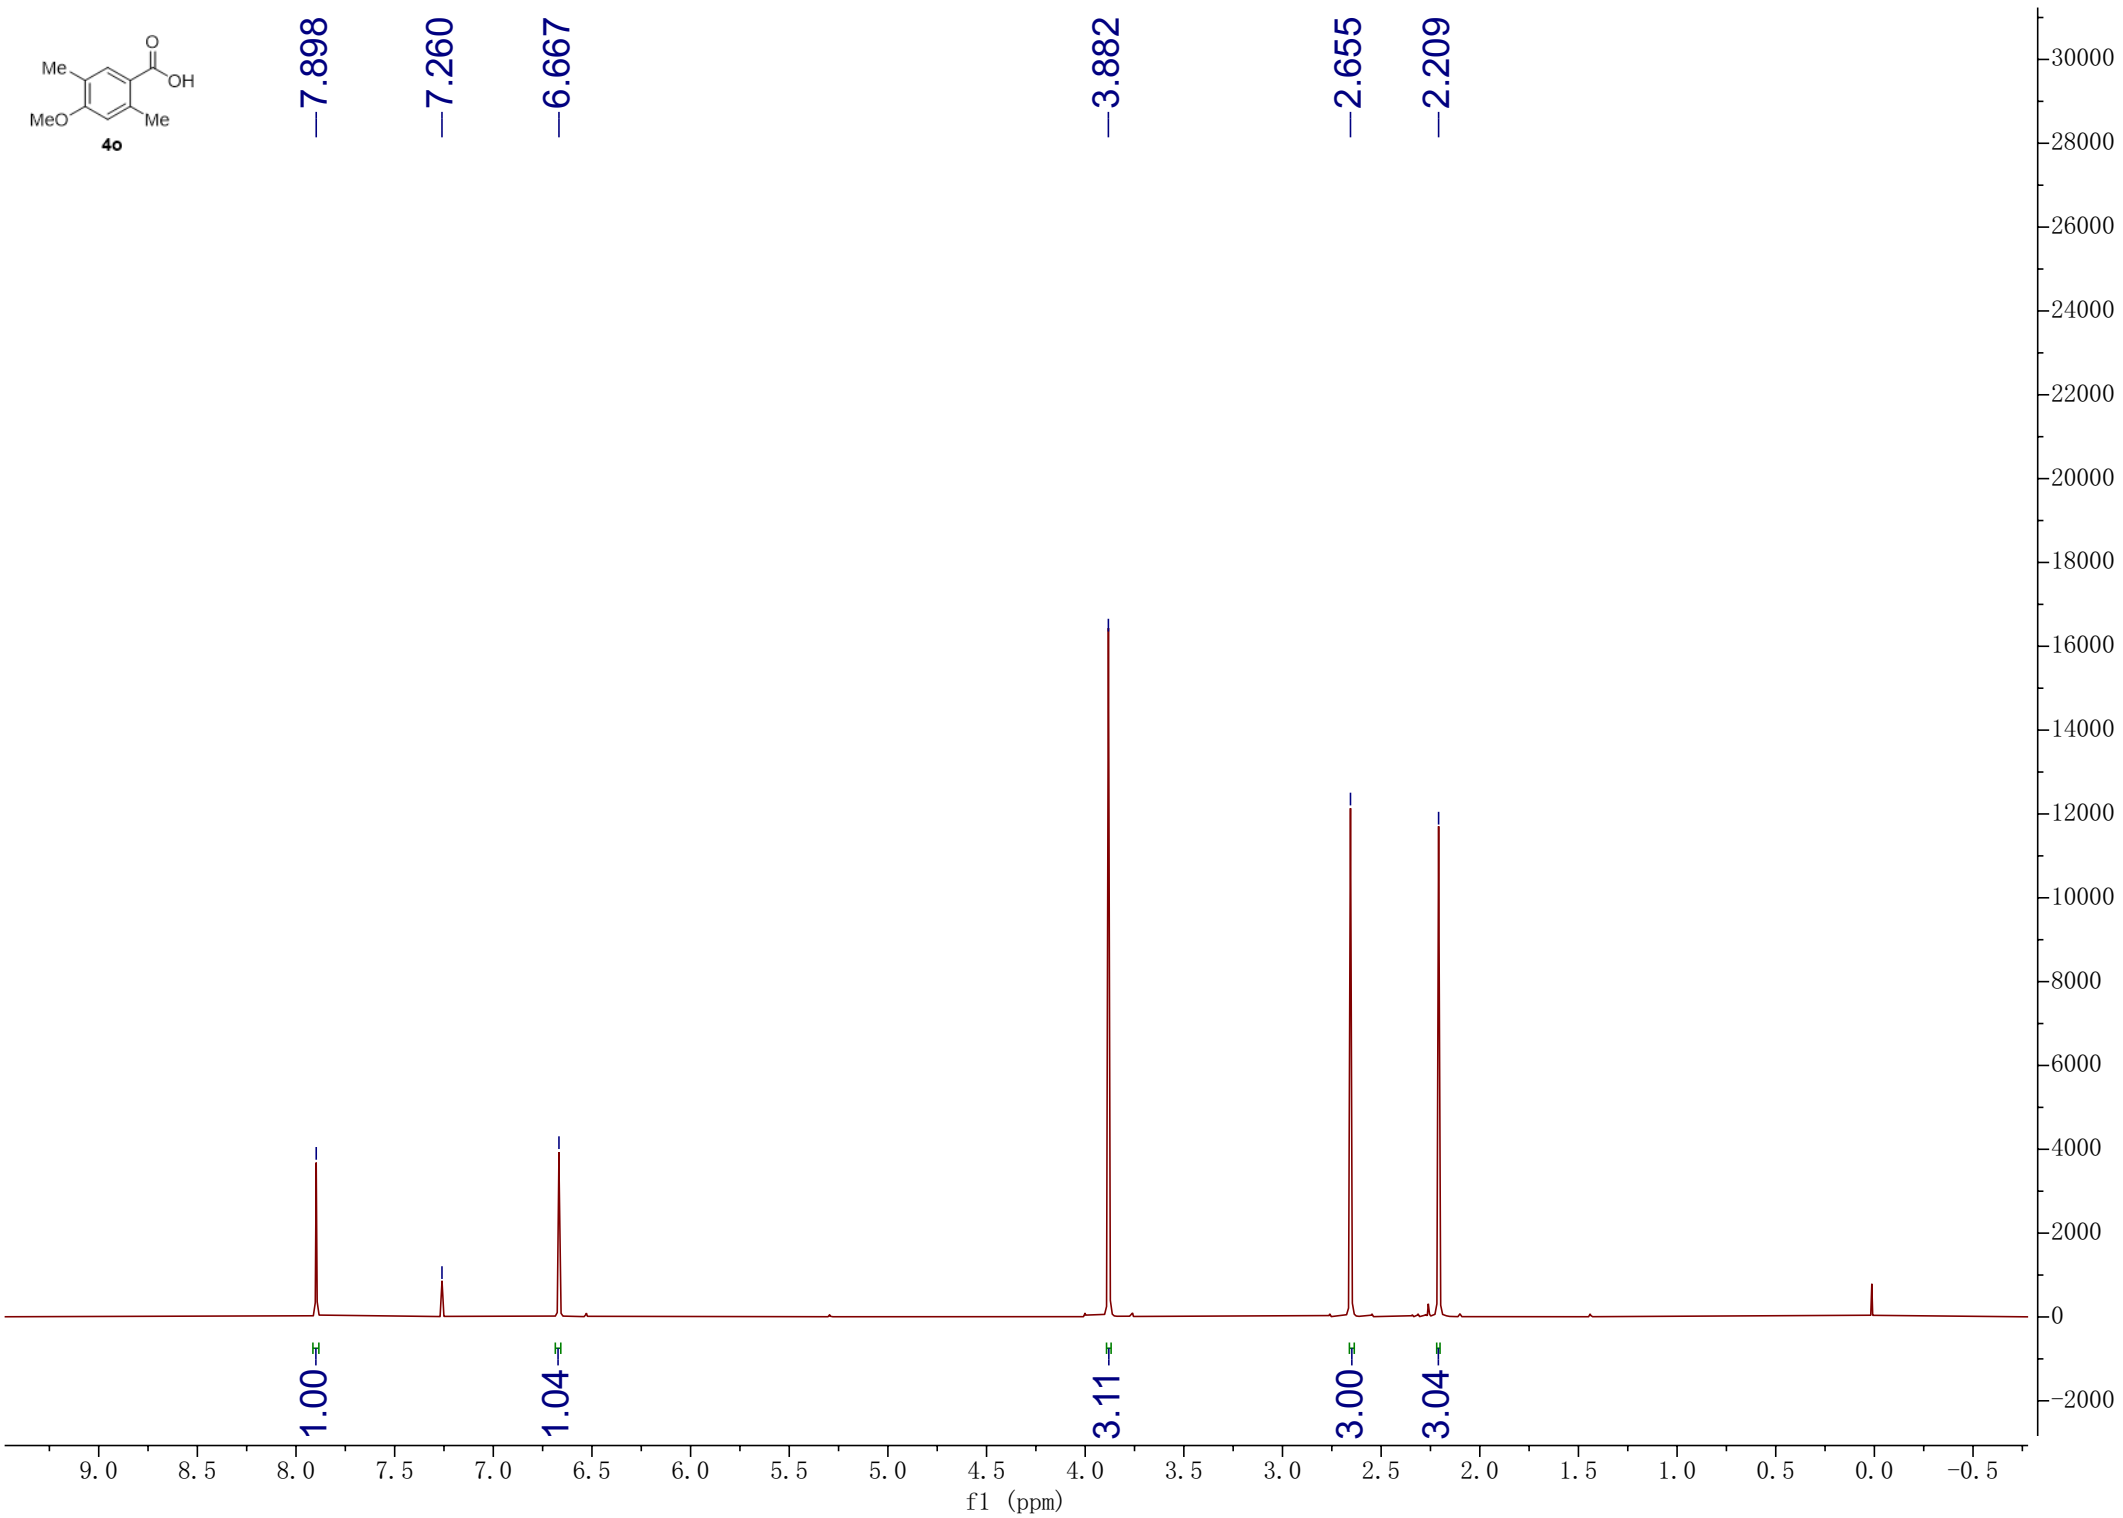

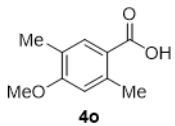

—173.21

—161.47

—142.13

—134.46

~124.24

~120.02

~113.21

77.44

77.23

77.02

—55.61

—22.70

—15.75

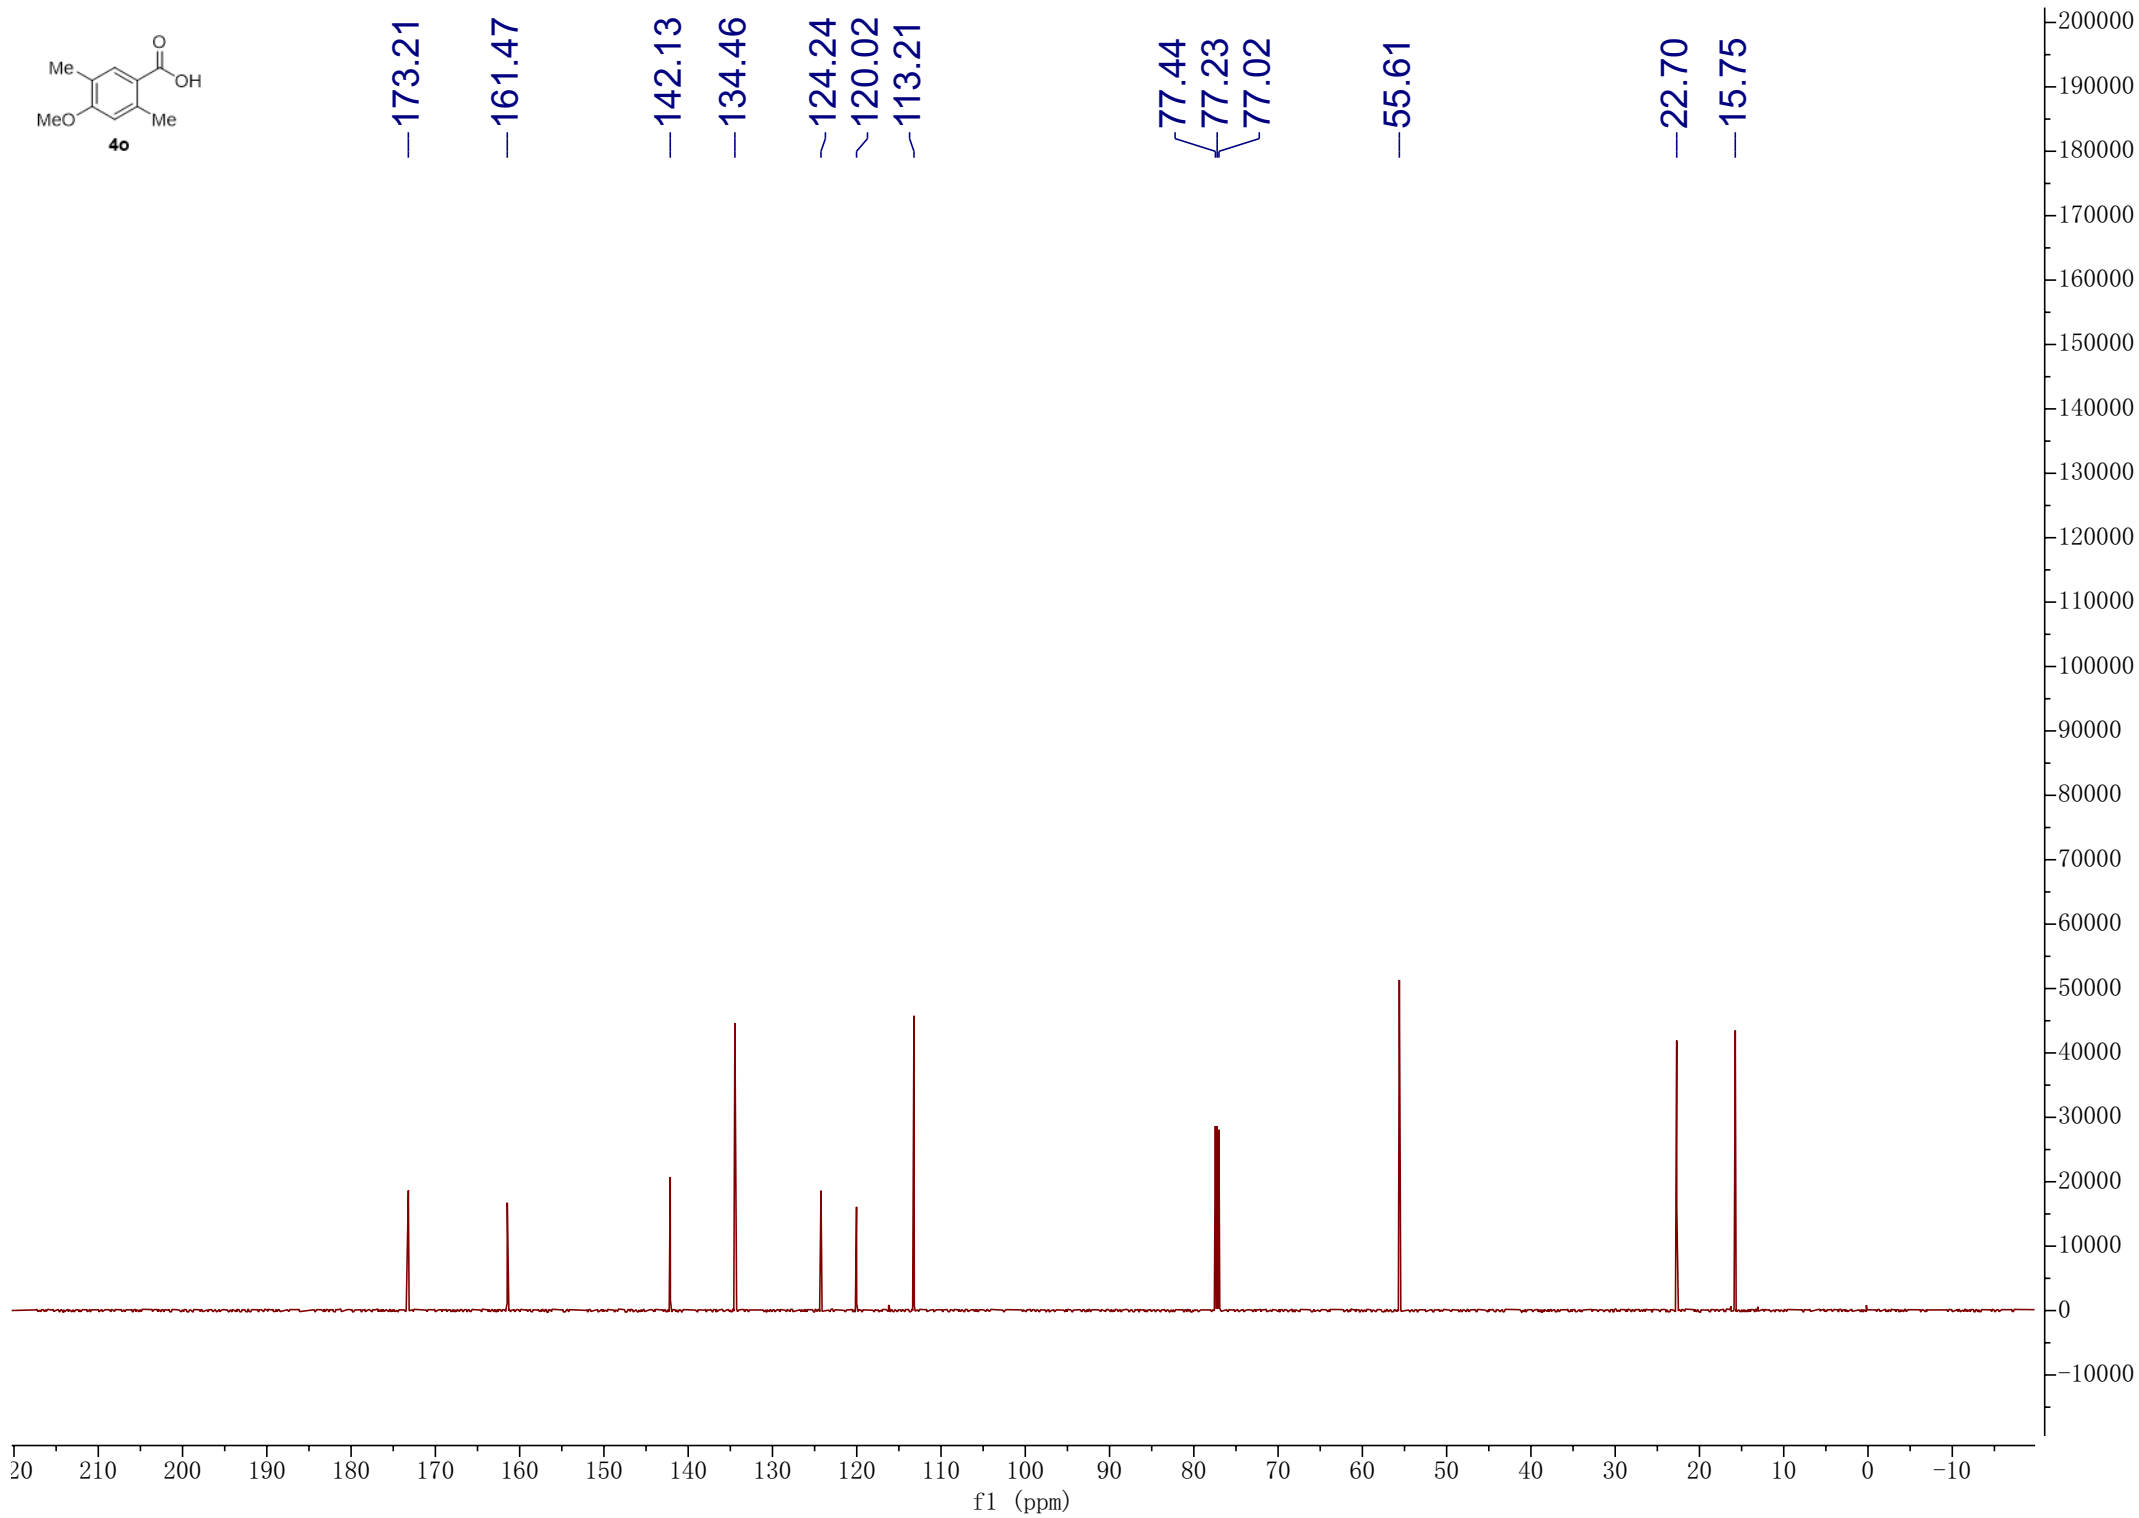

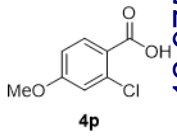

—12.975

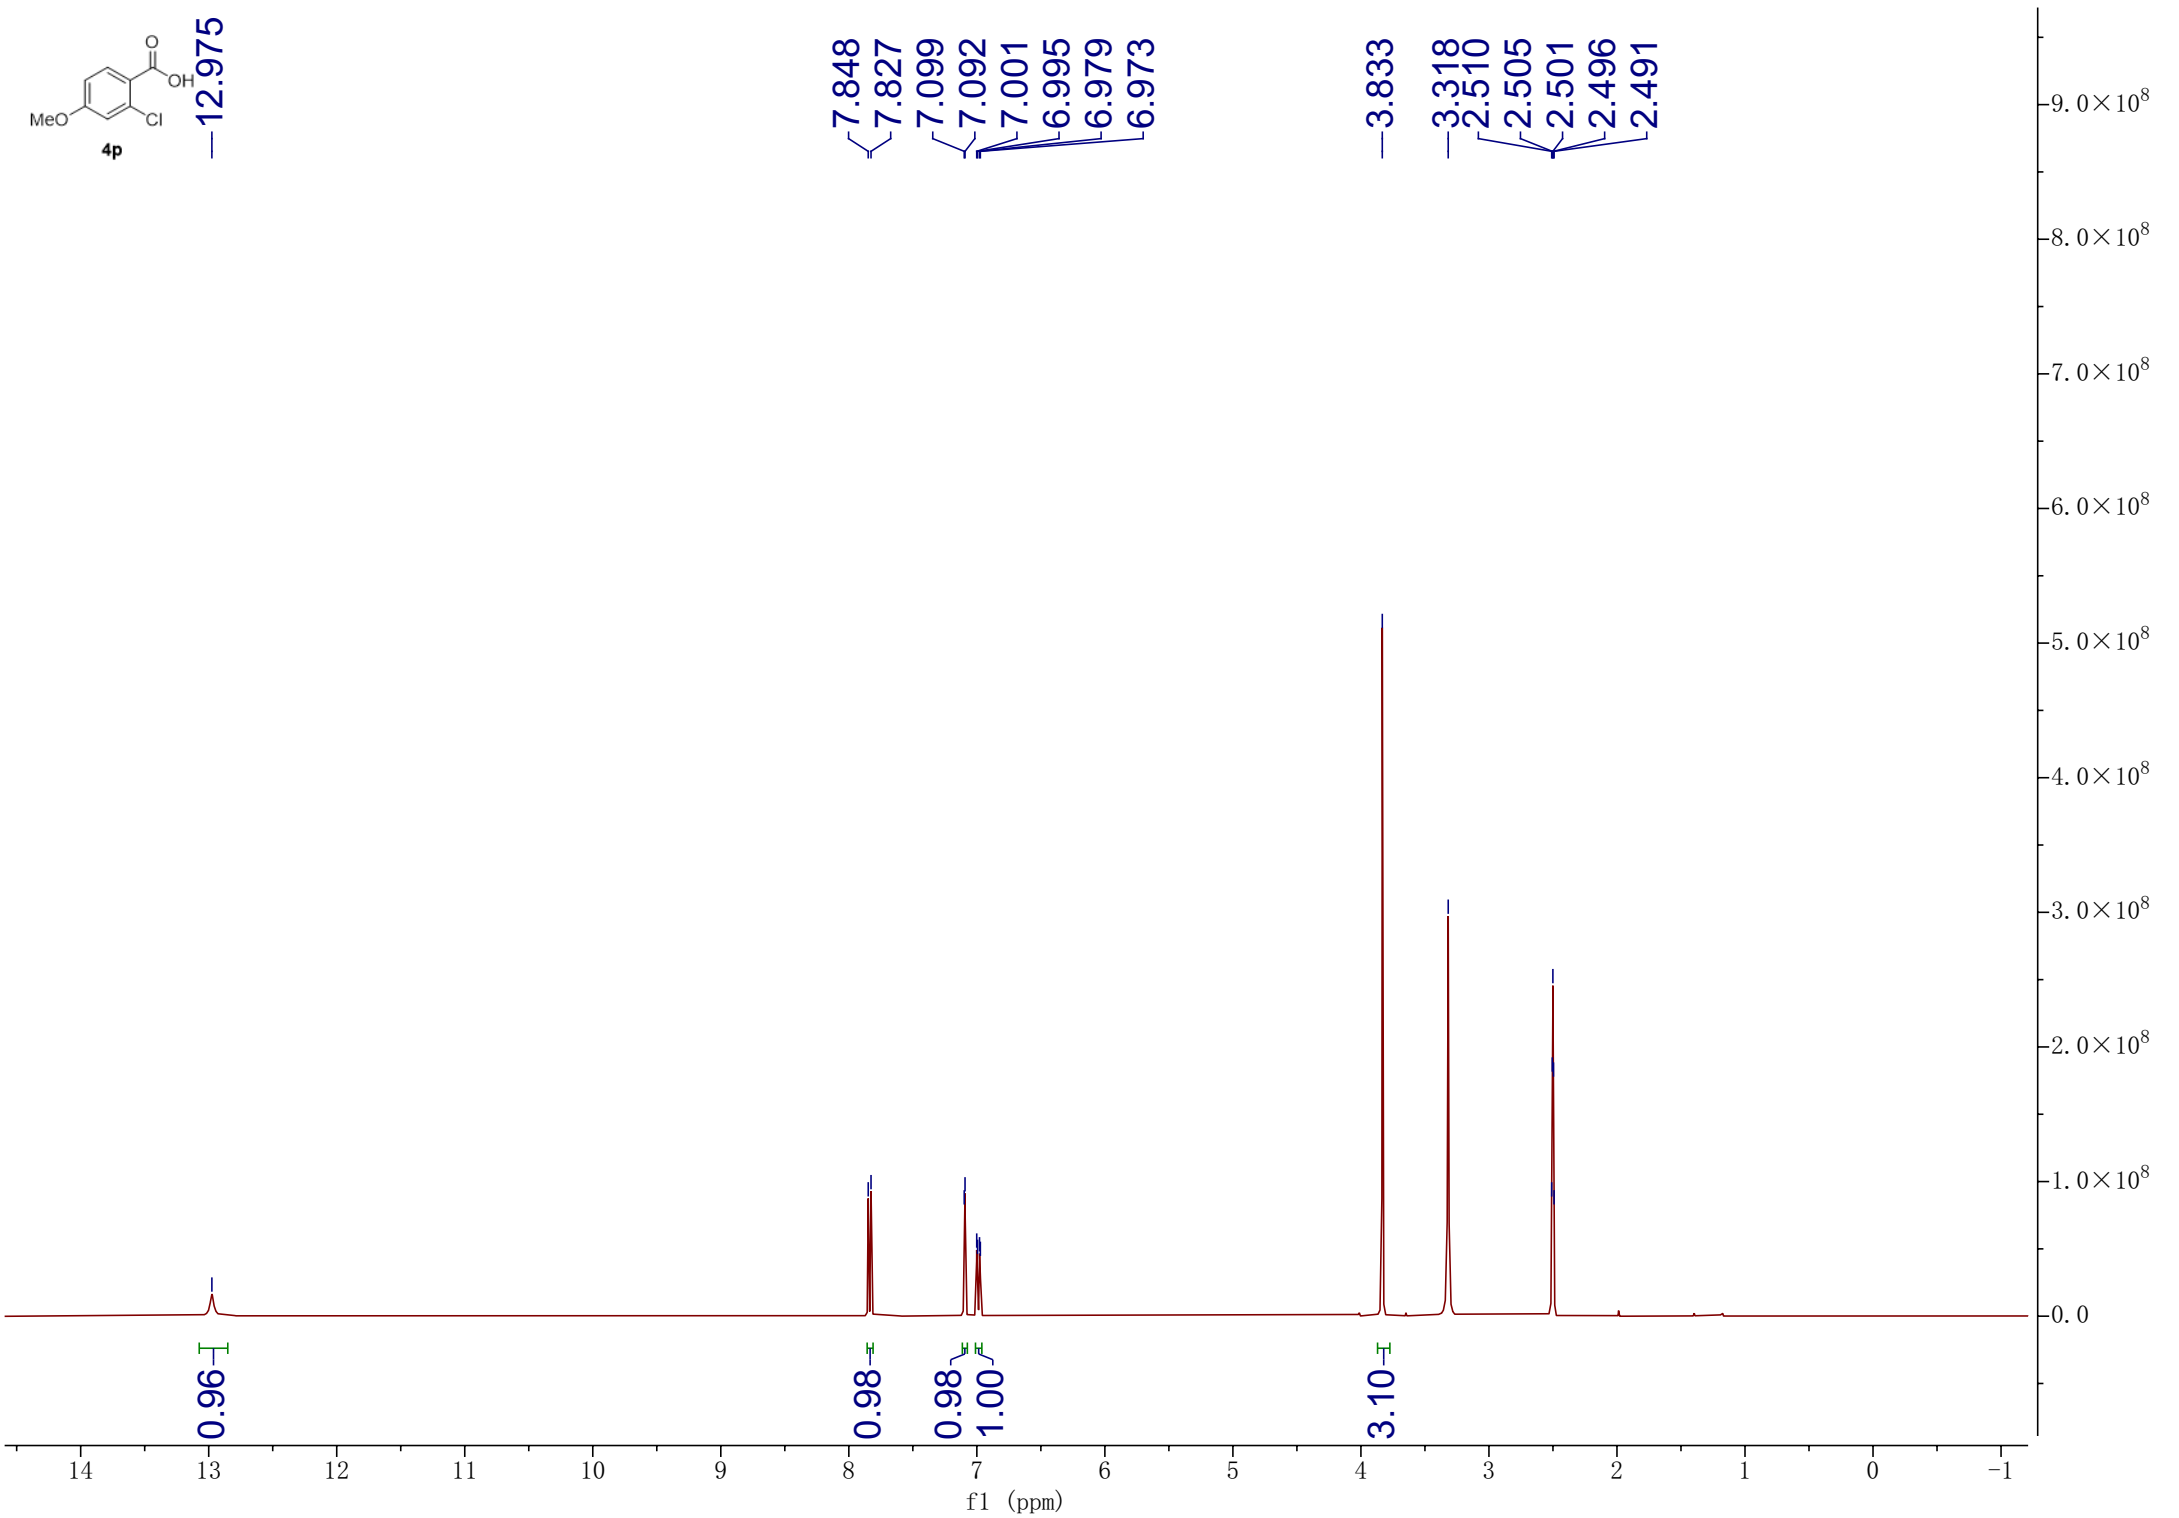

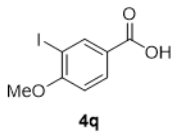

— 12.862

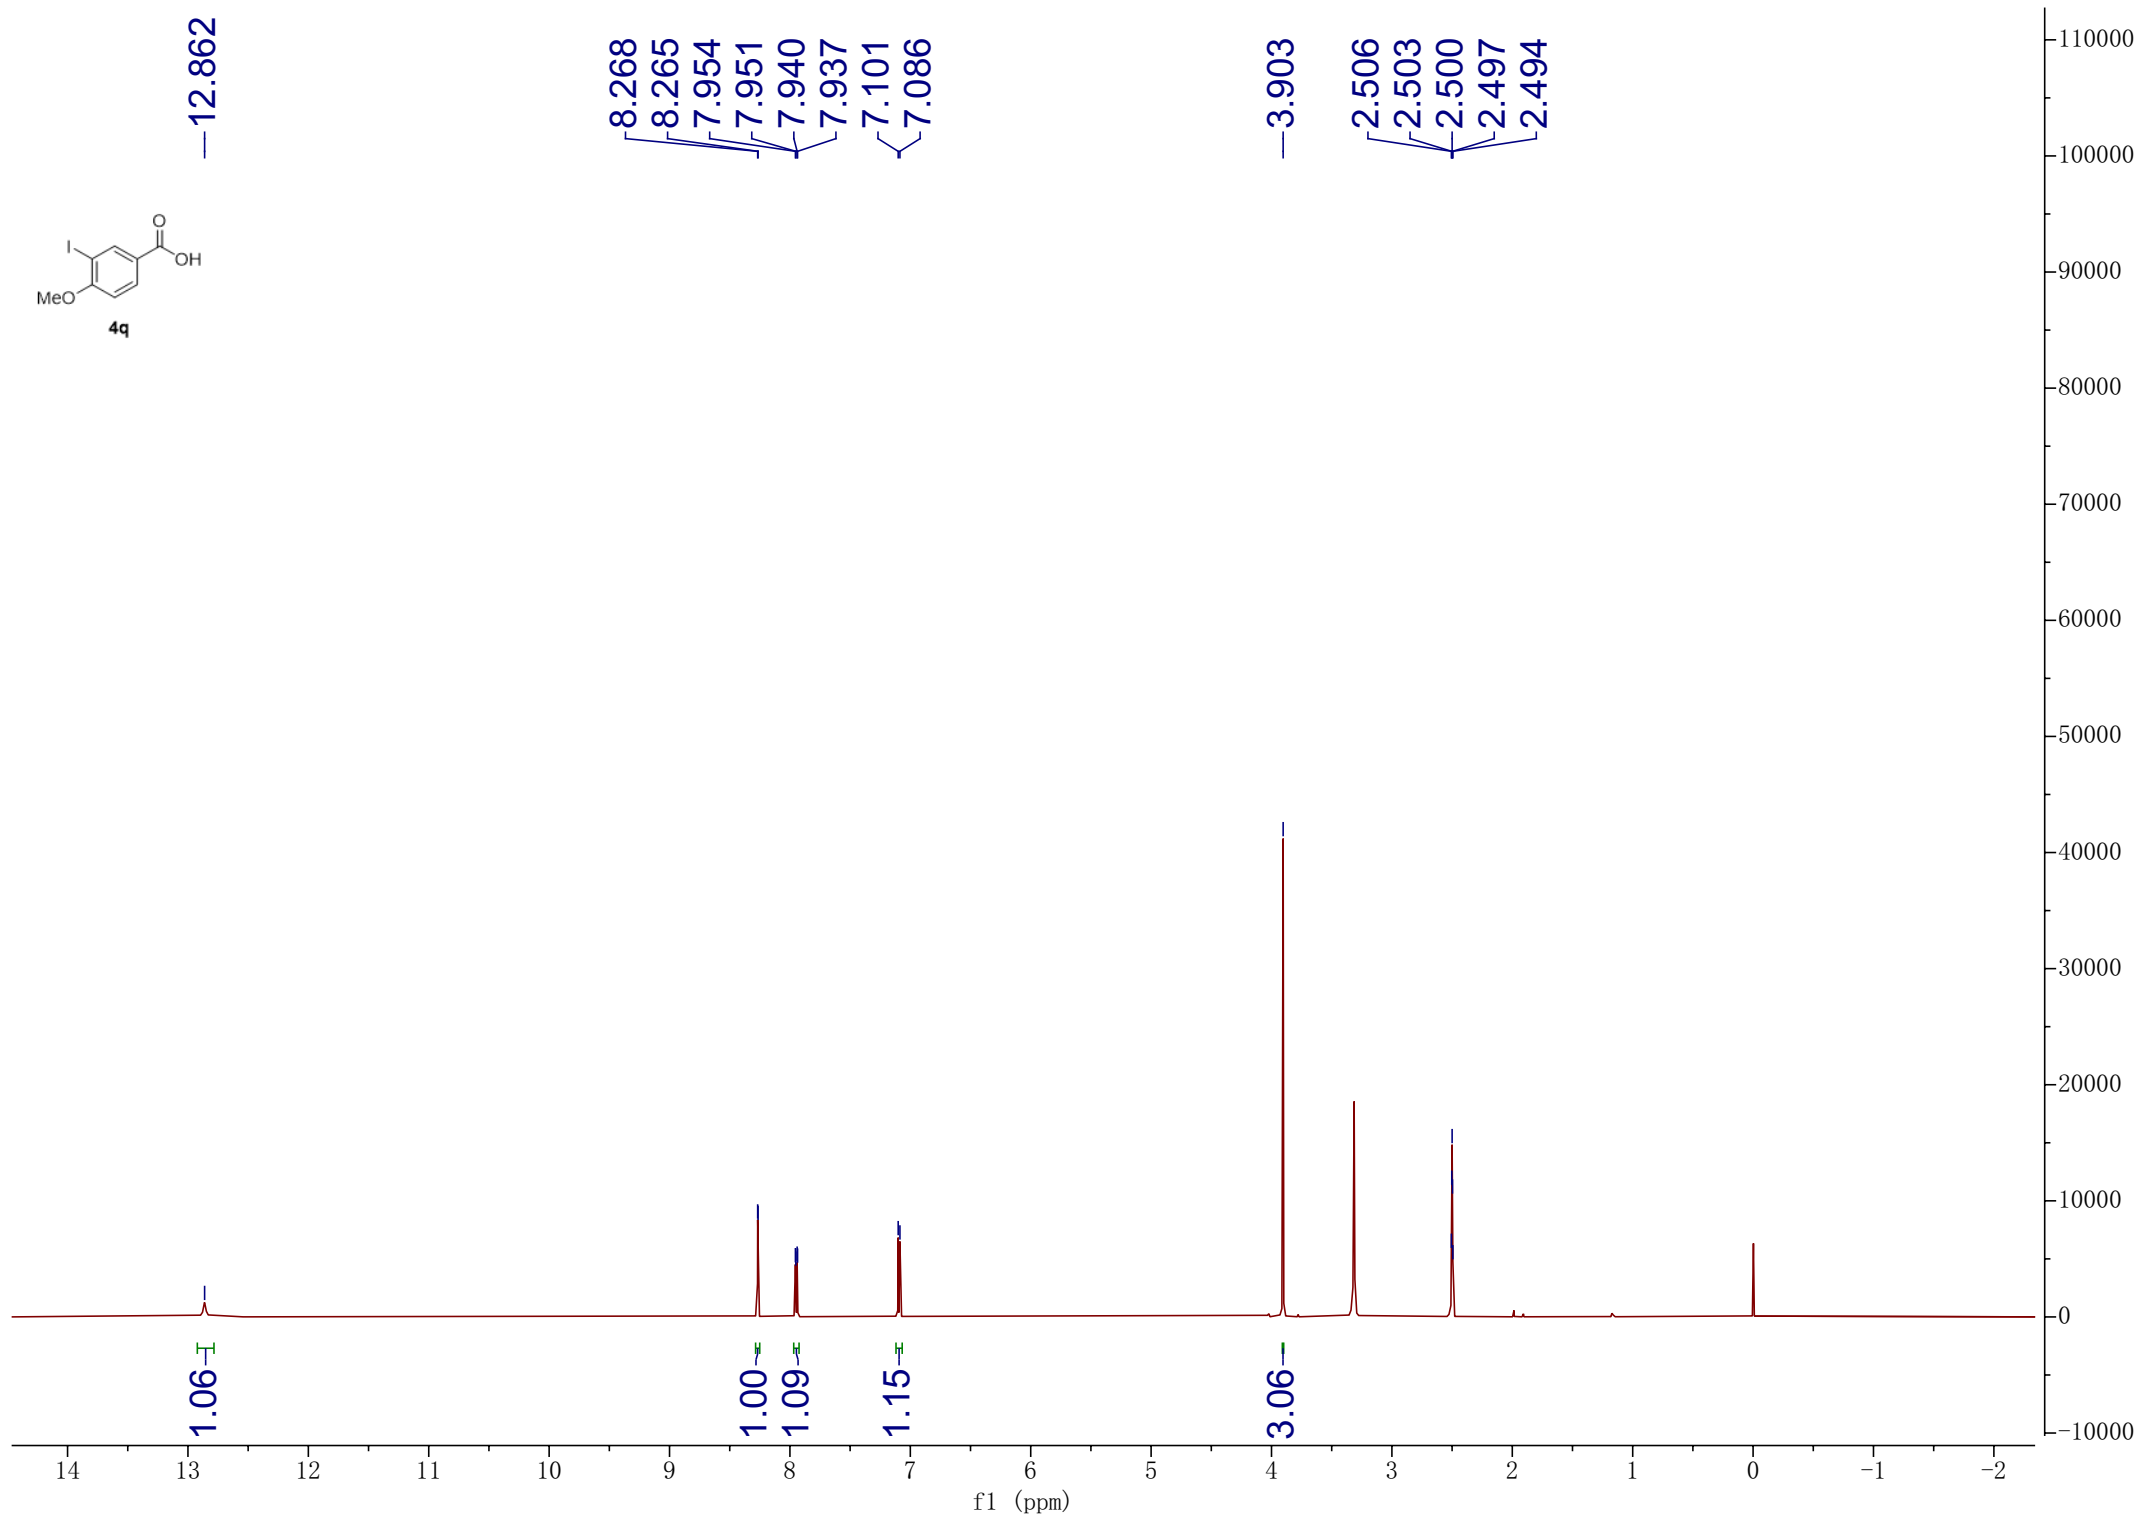

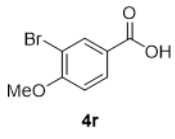

—12.932

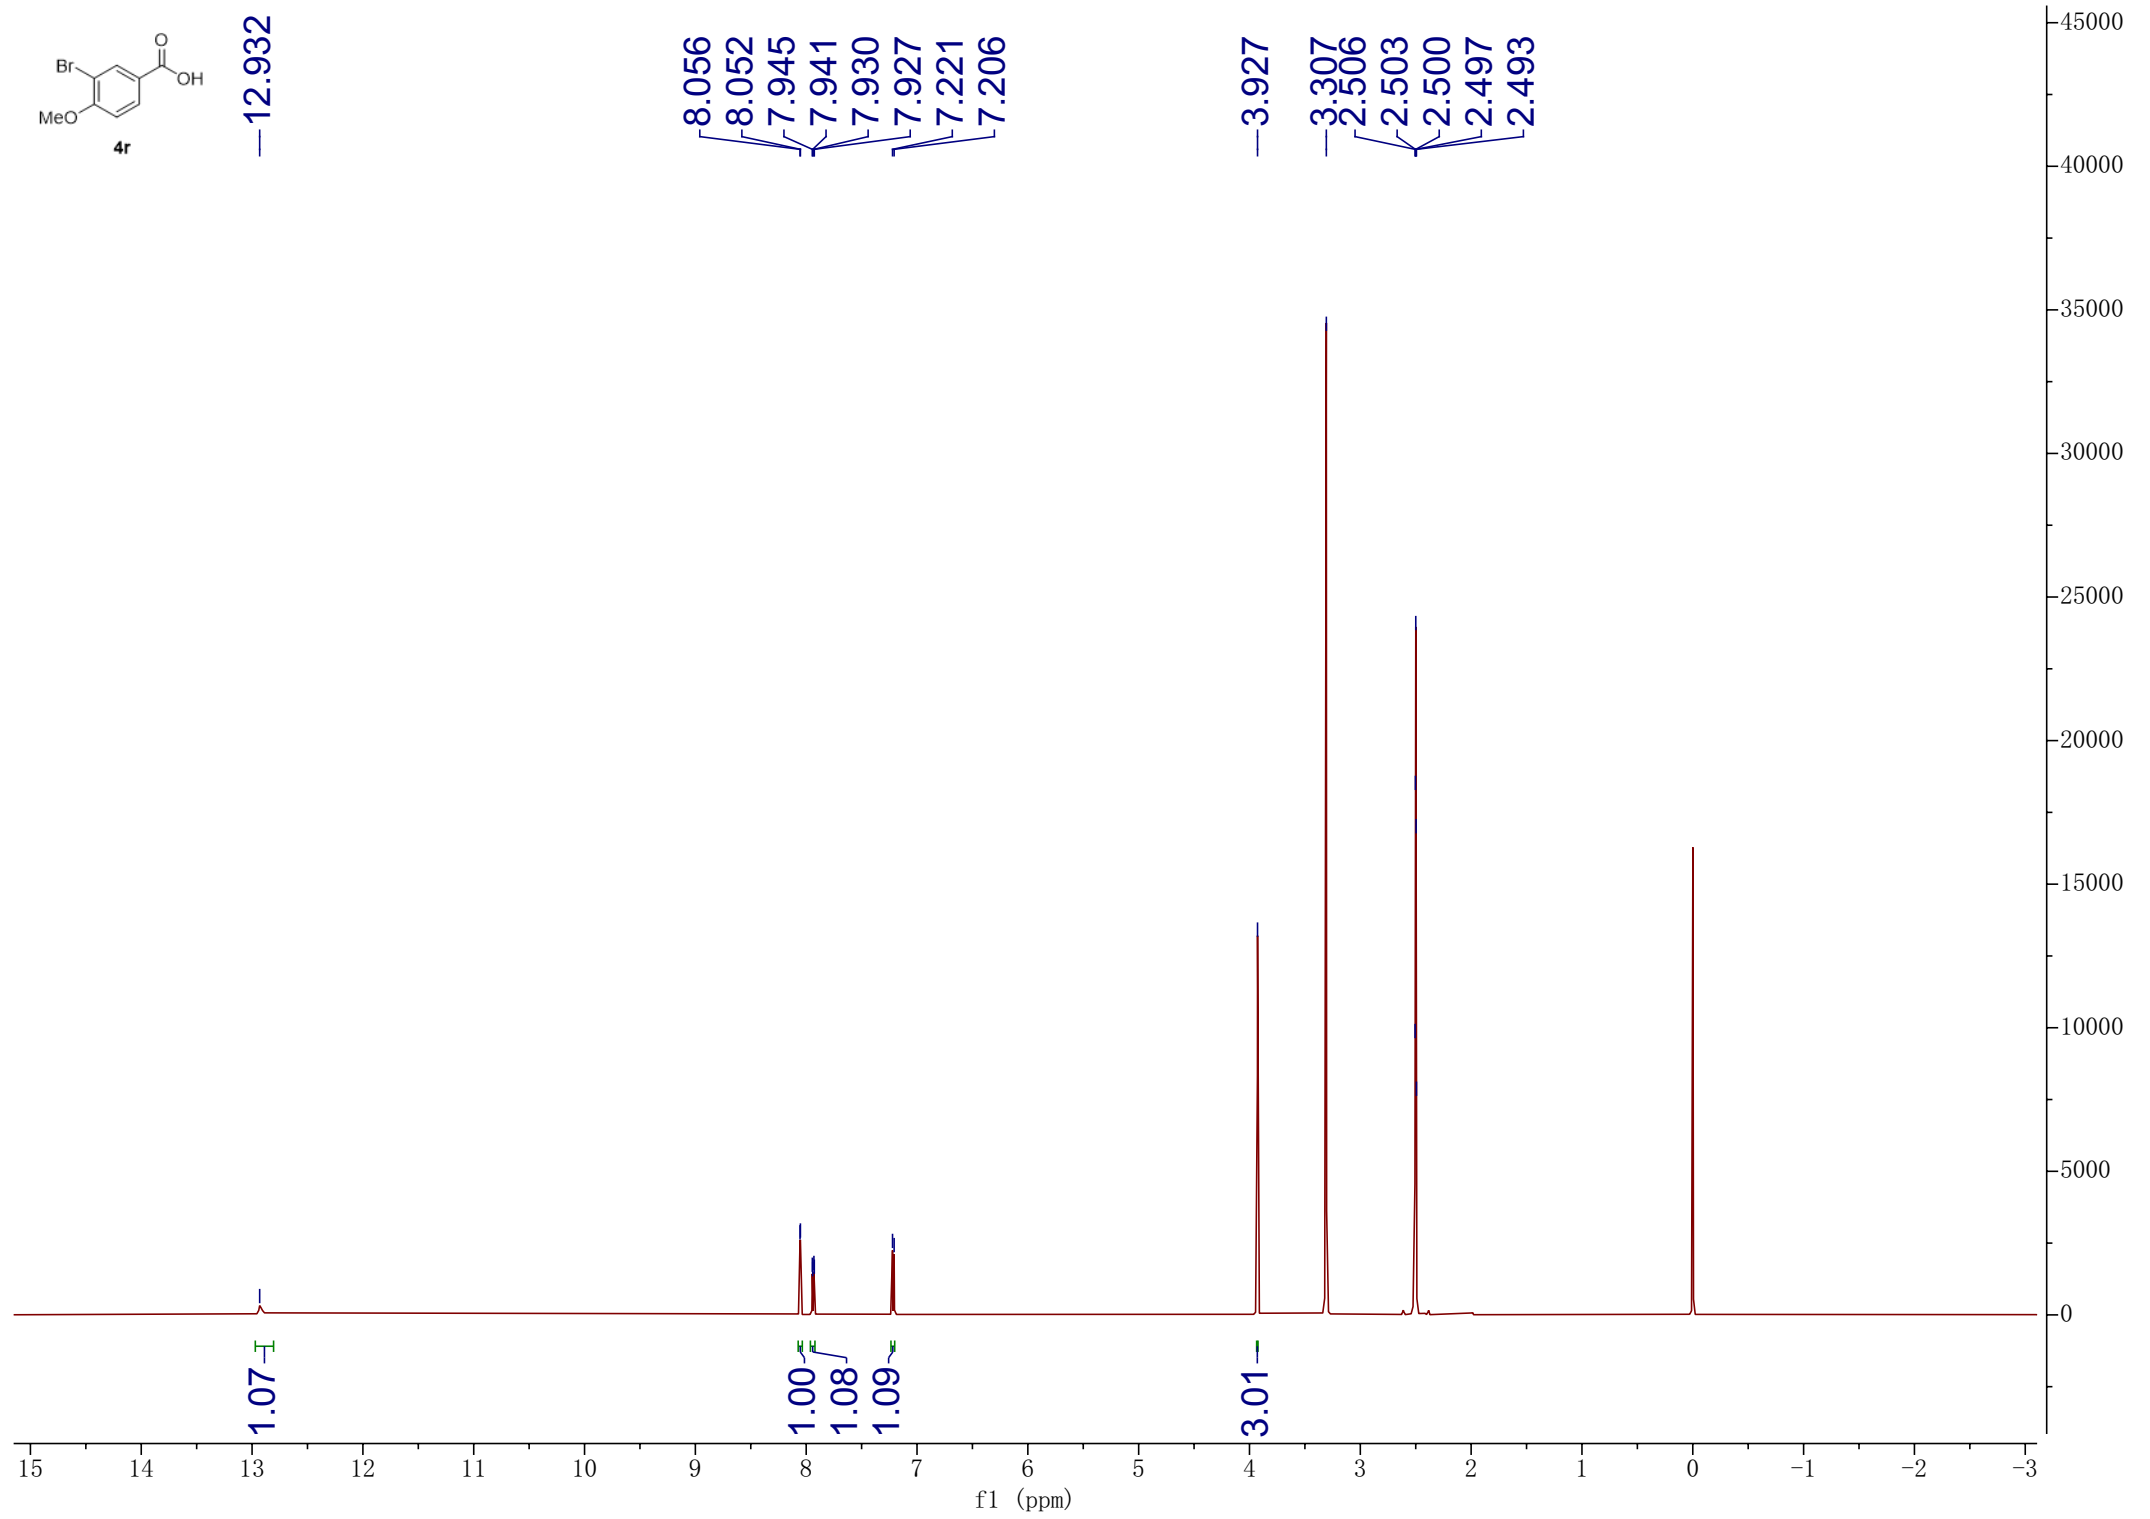

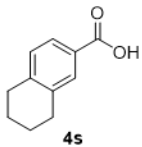

7.827  
7.824  
7.819  
7.805  
7.260  
7.156  
7.143

2.828  
1.851  
1.848  
1.845  
1.842  
1.836  
1.831  
1.829  
1.825  
1.820  
1.818  
1.814  
1.808  
1.805

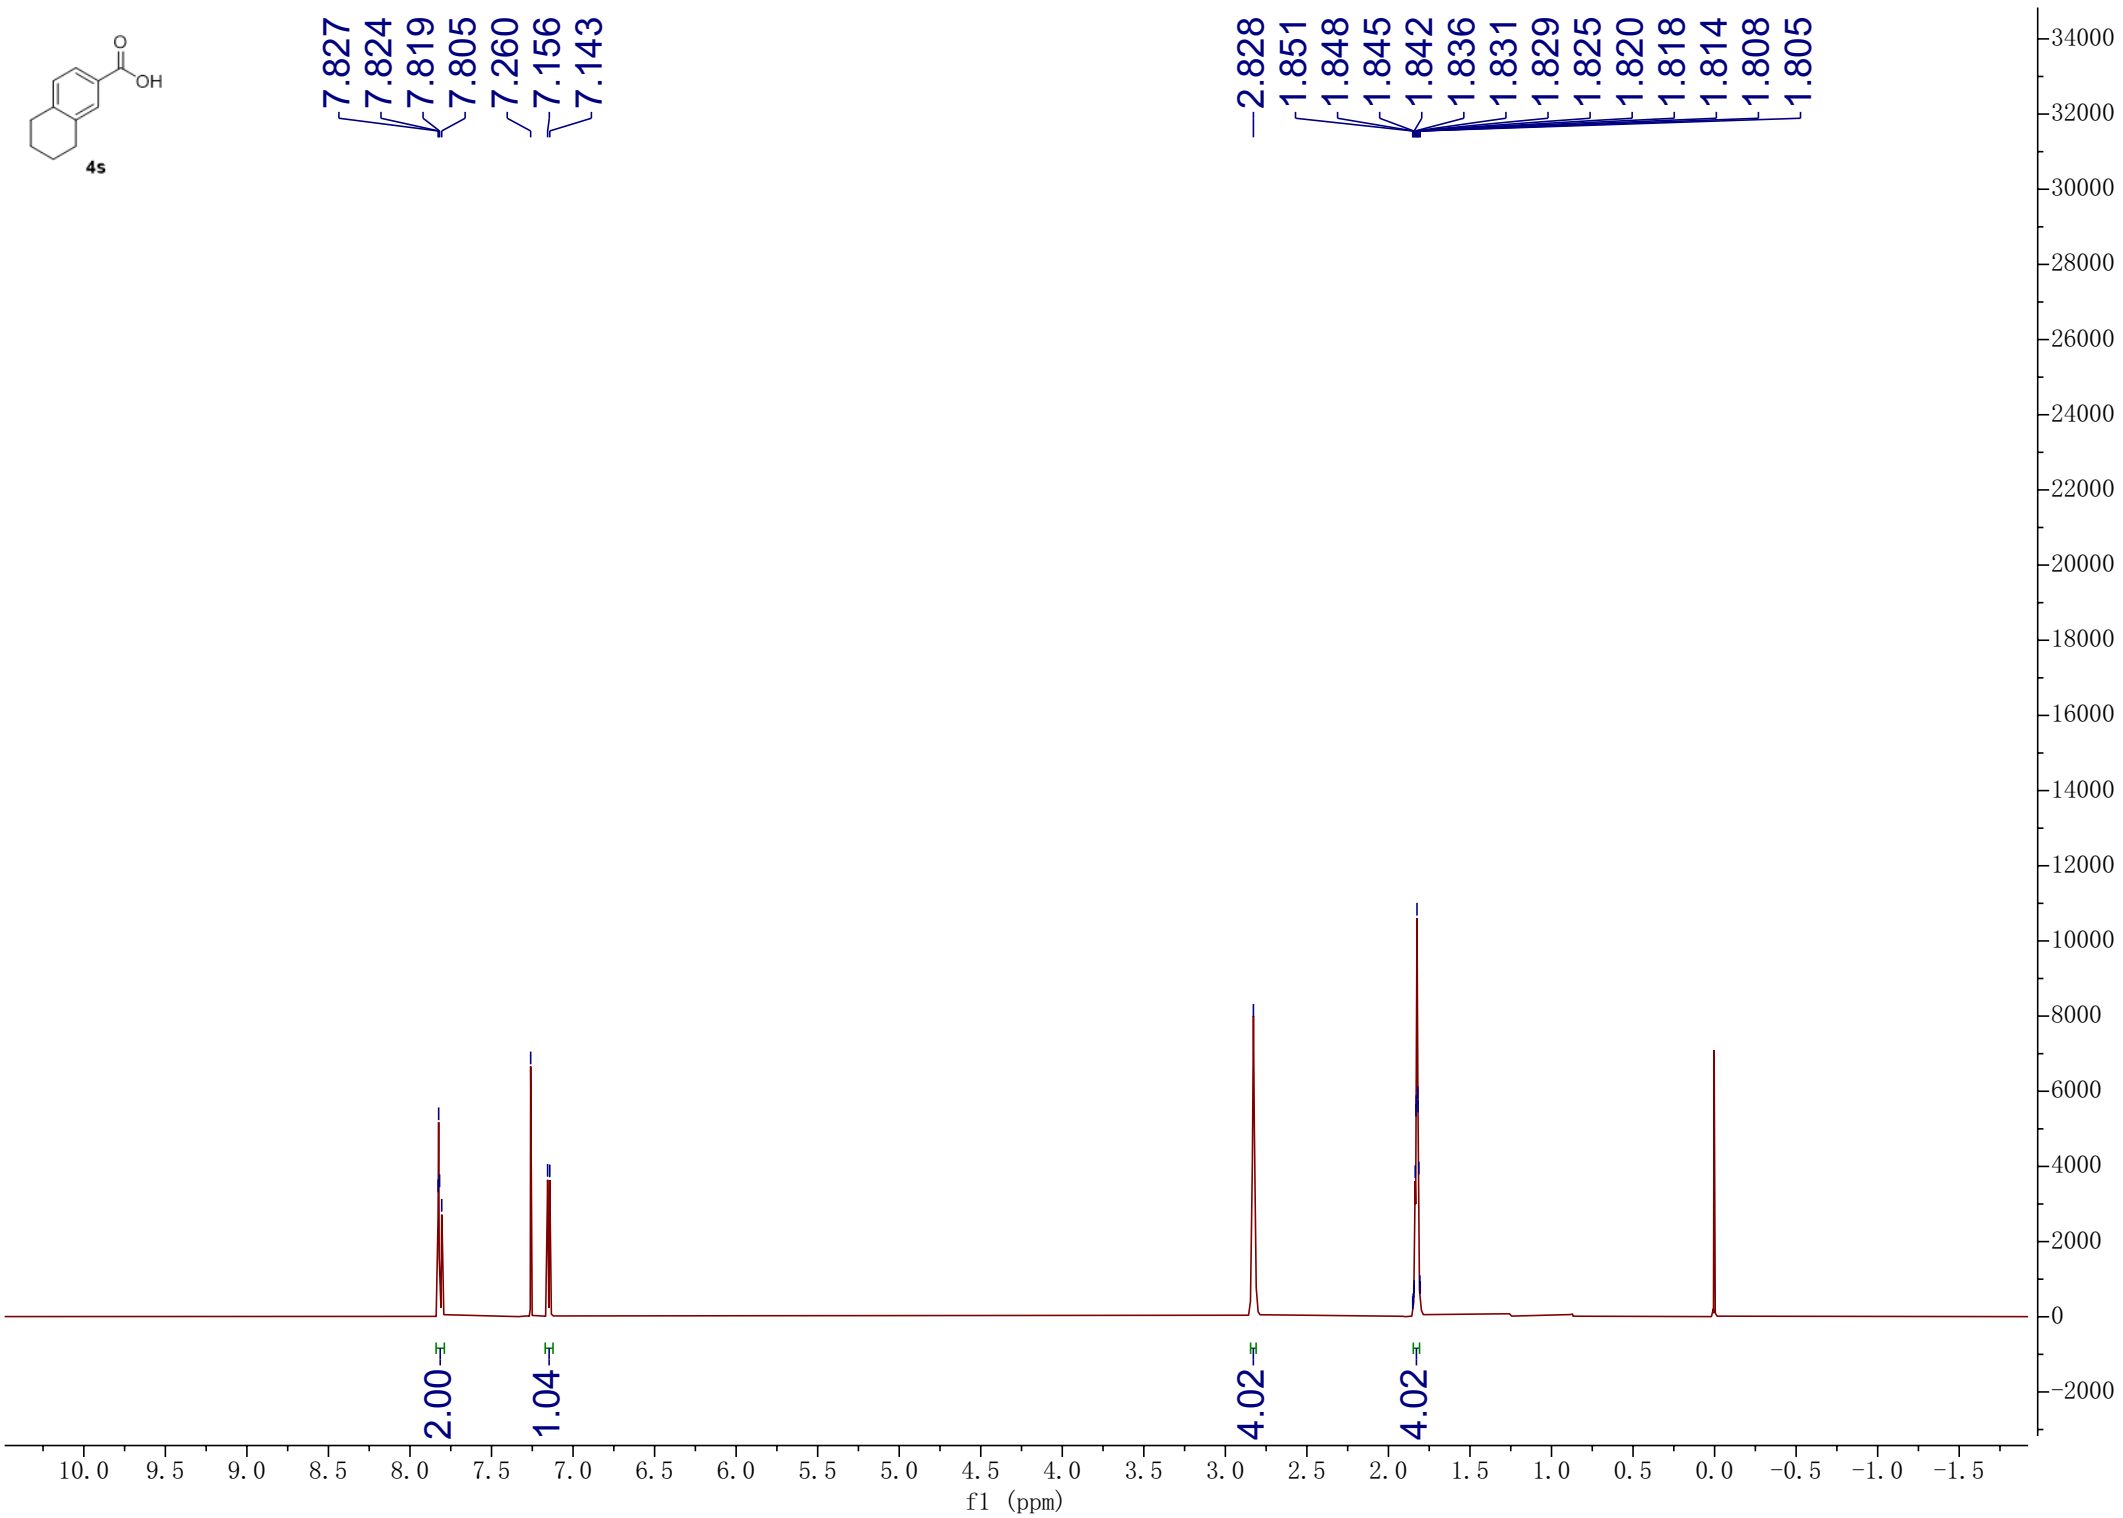



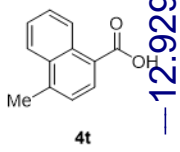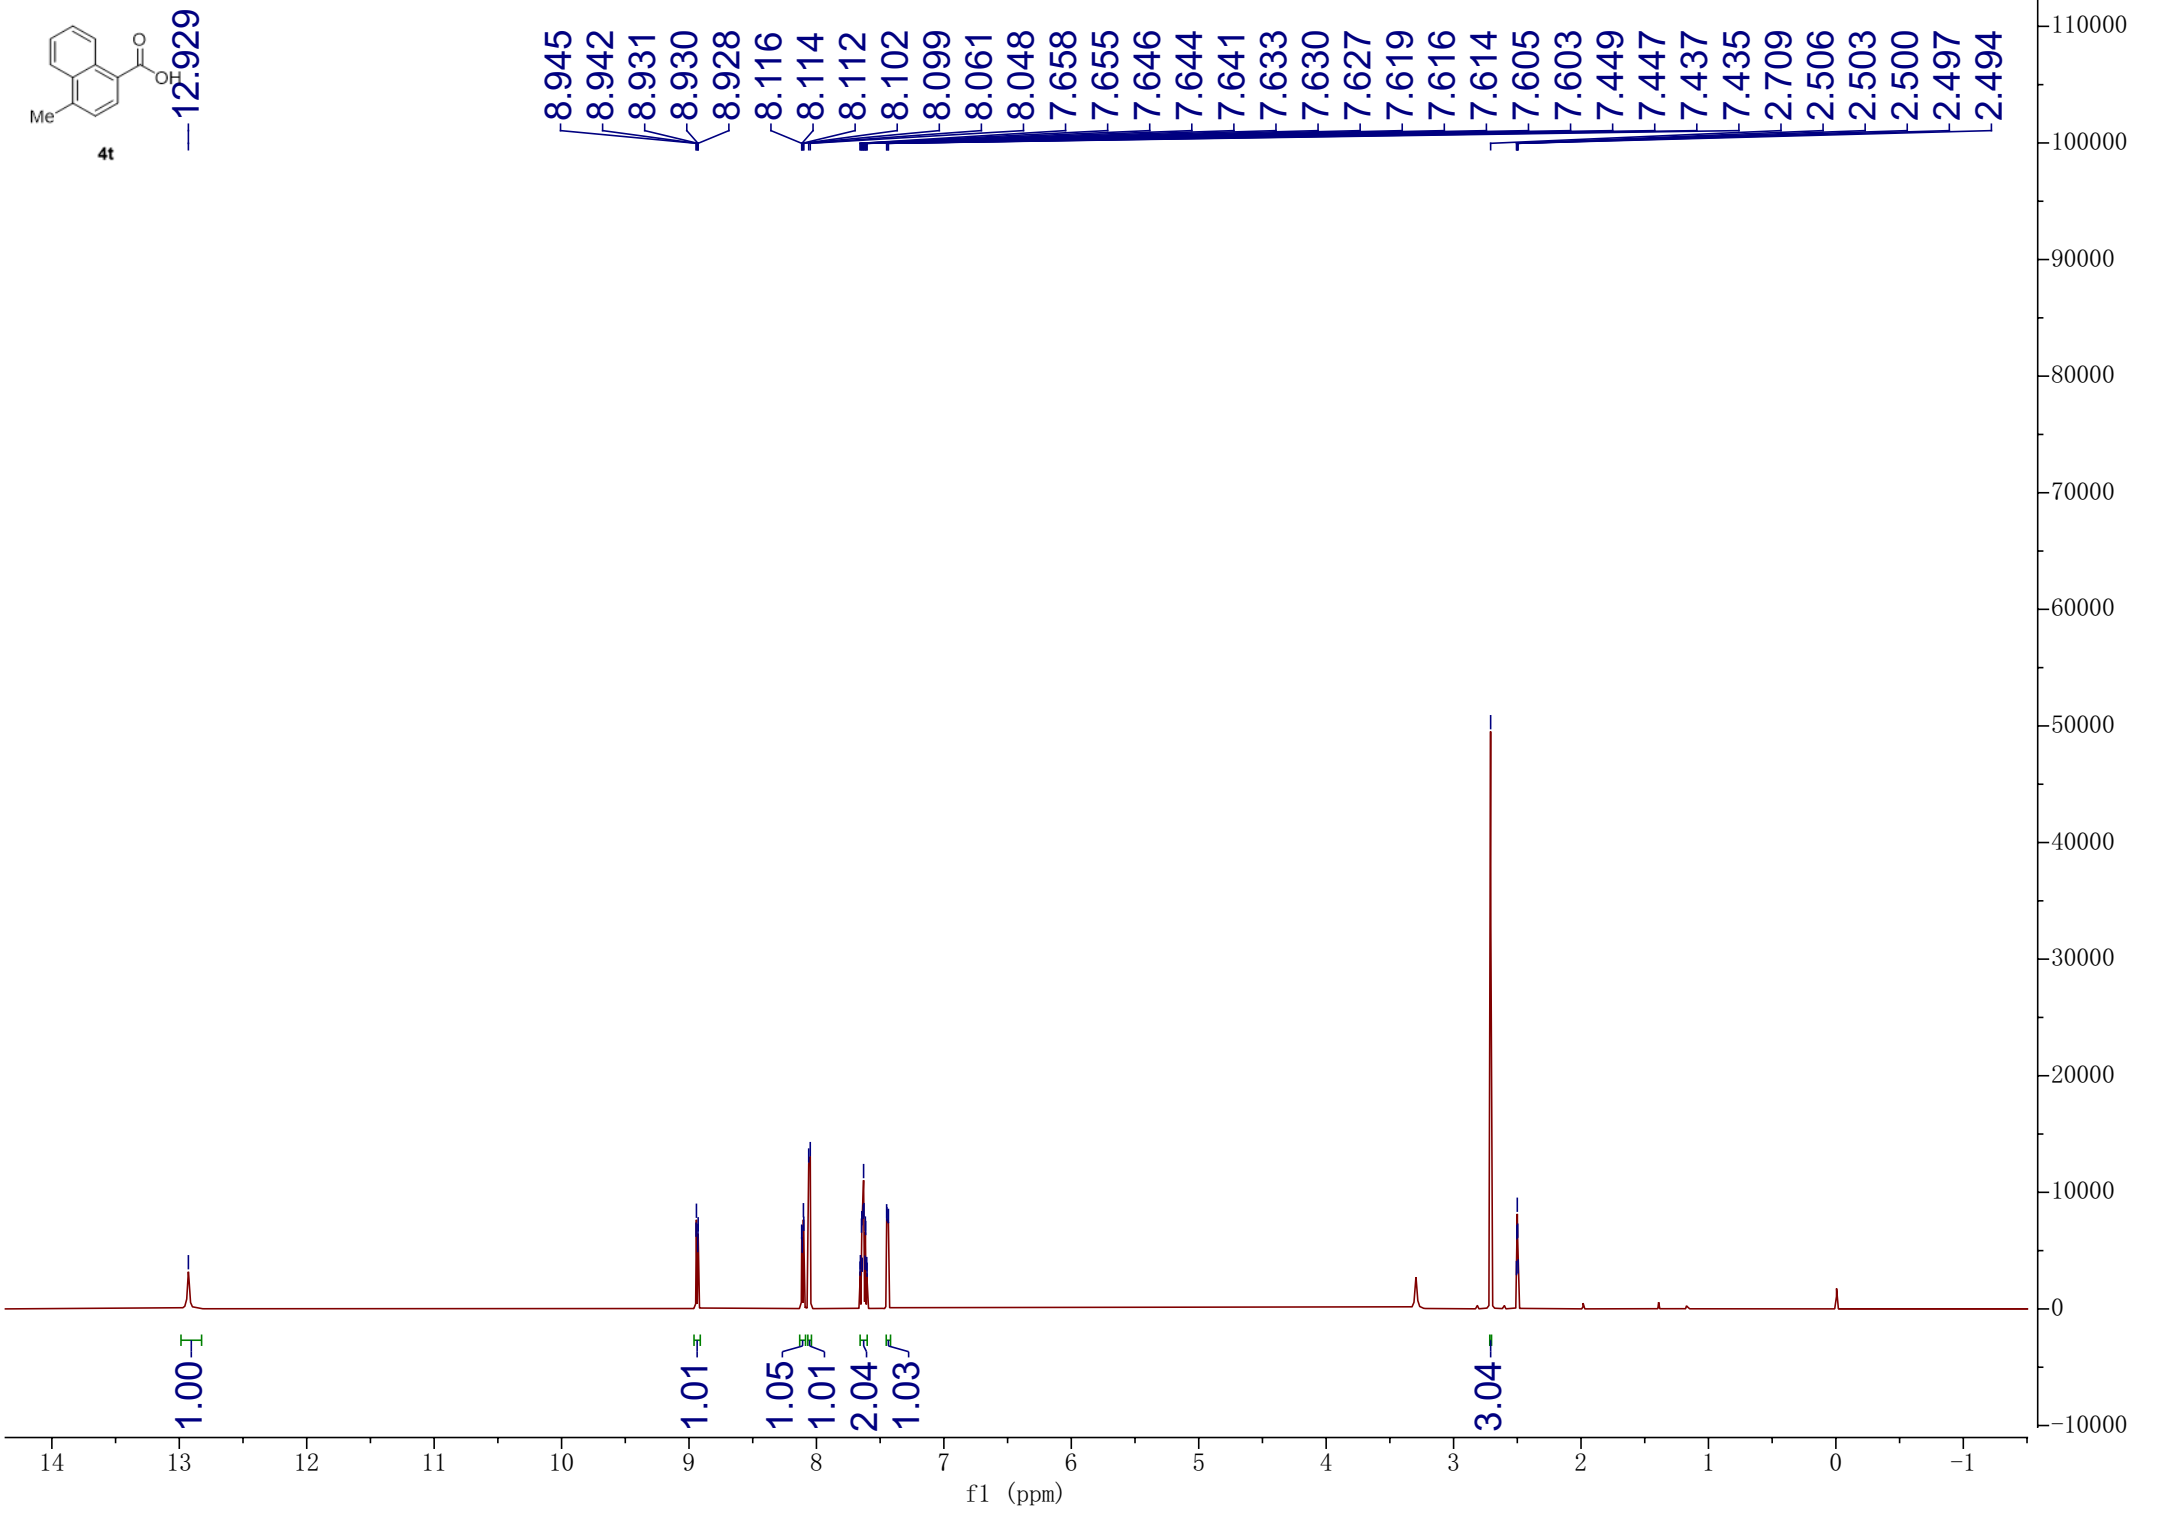

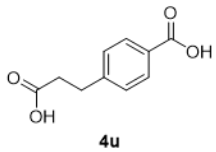

—12.468

7.861  
7.842  
7.357  
7.337

2.903  
2.885  
2.866  
2.586  
2.567  
2.548

1.94

2.00

2.02

2.11

2.01

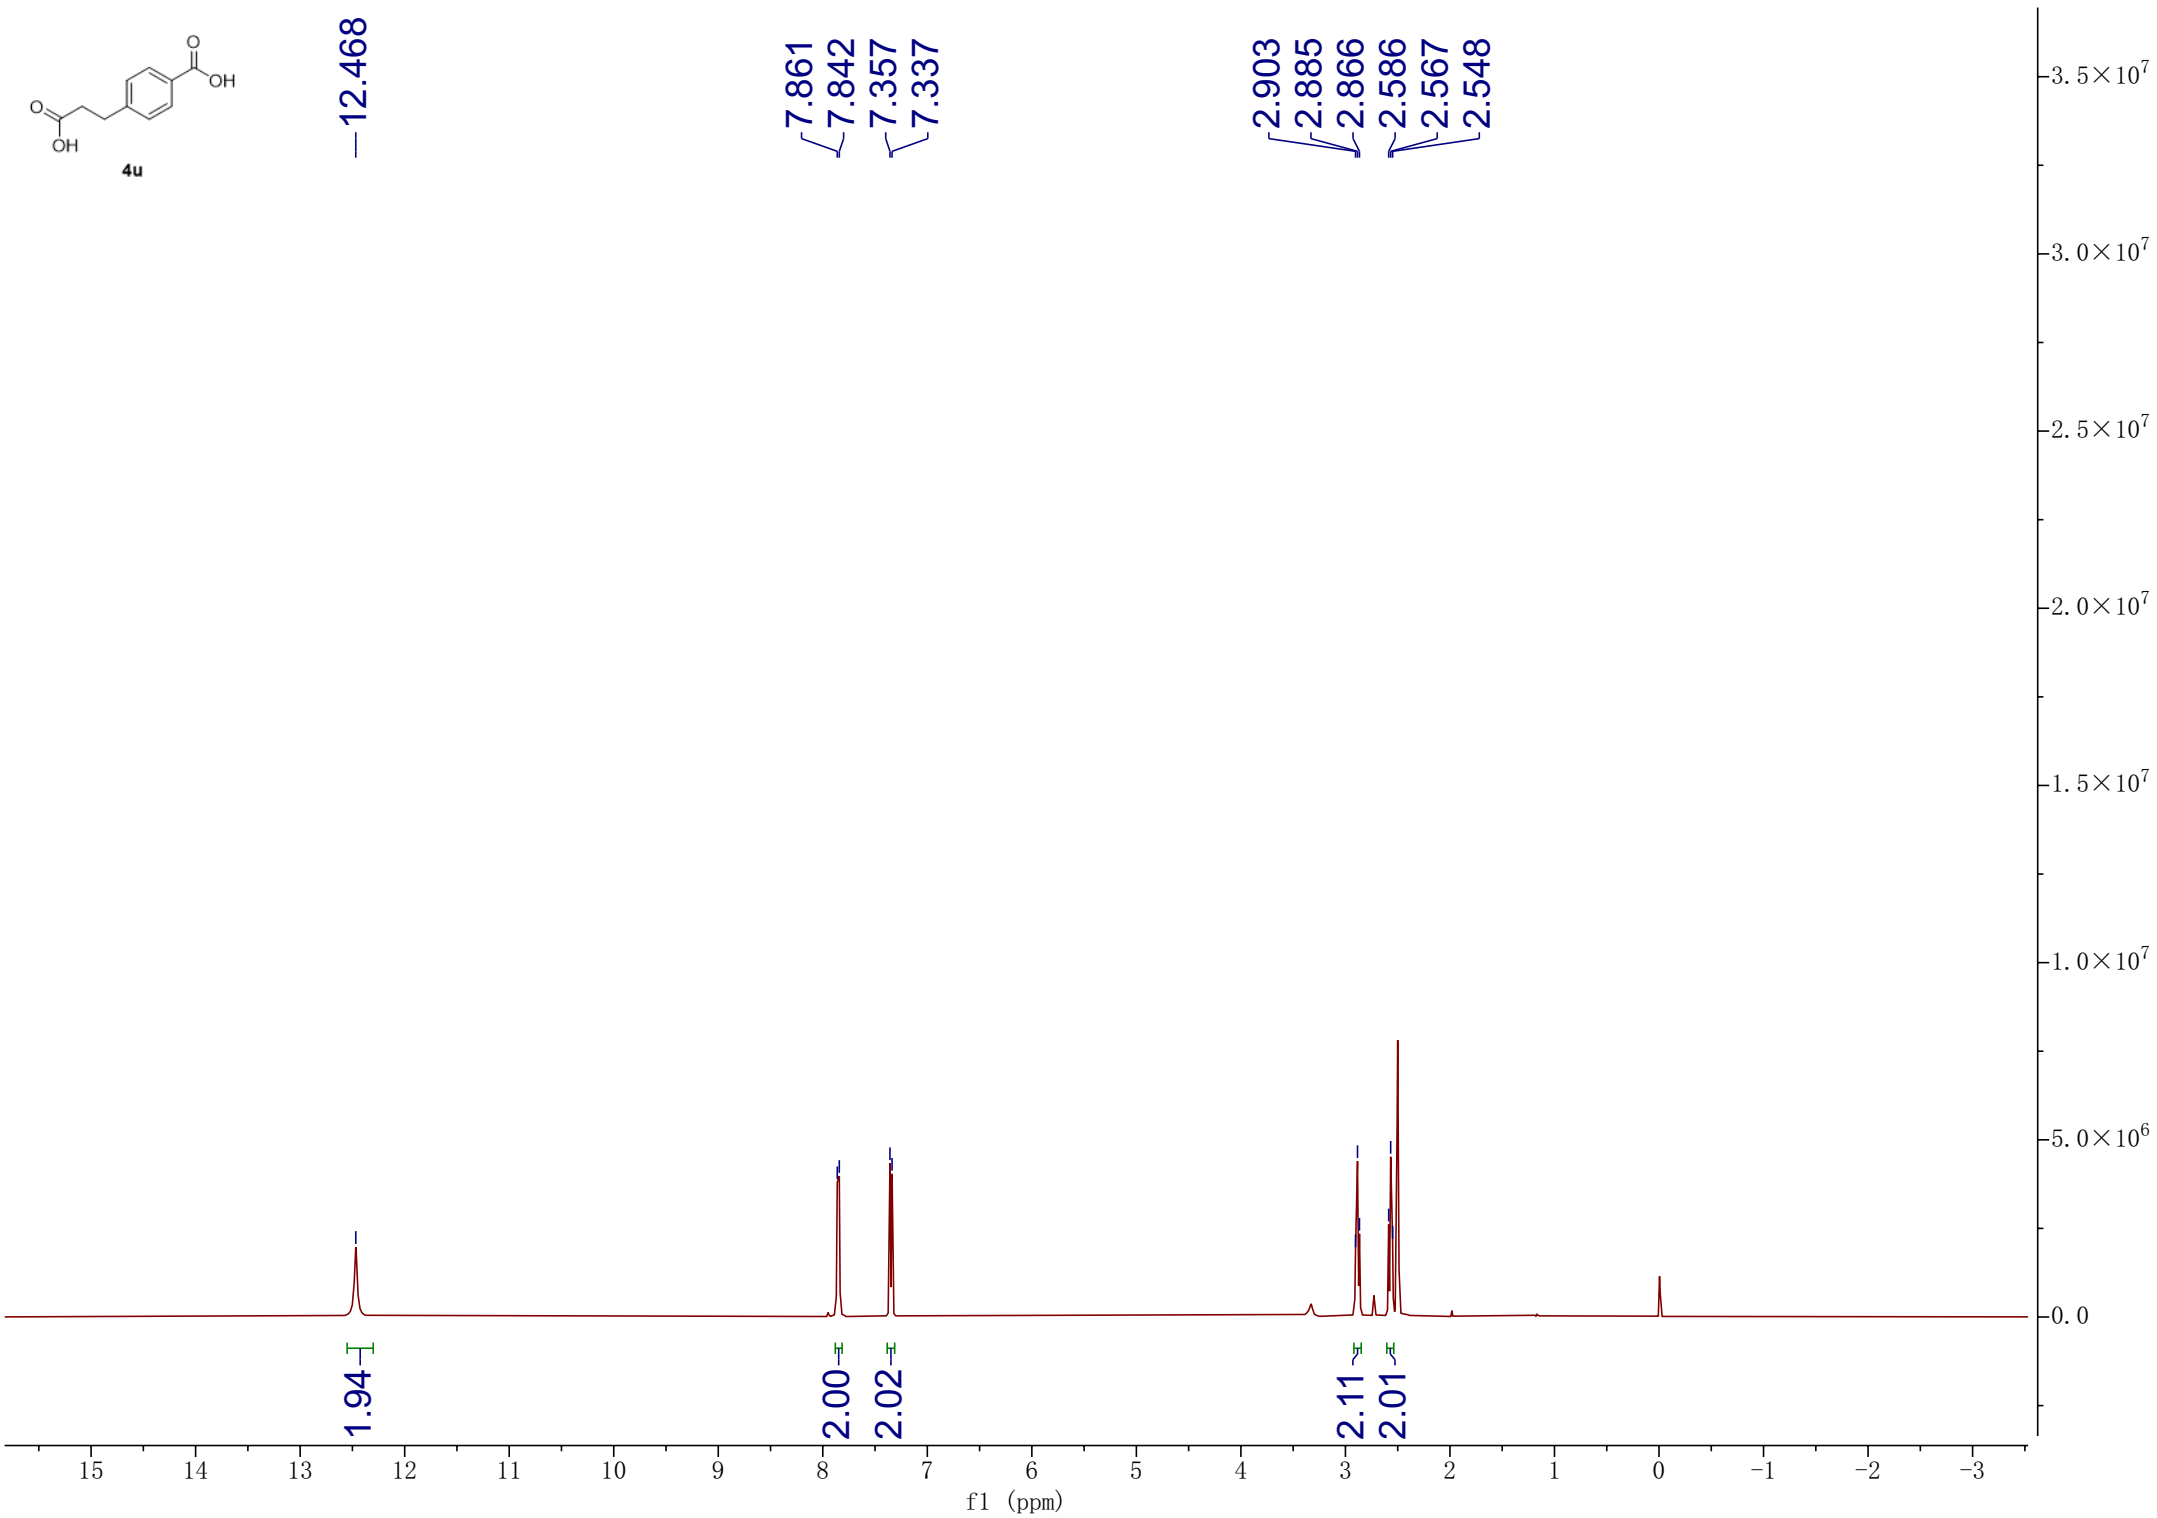

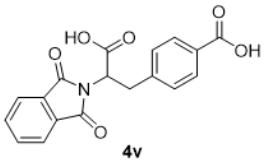

—13.095

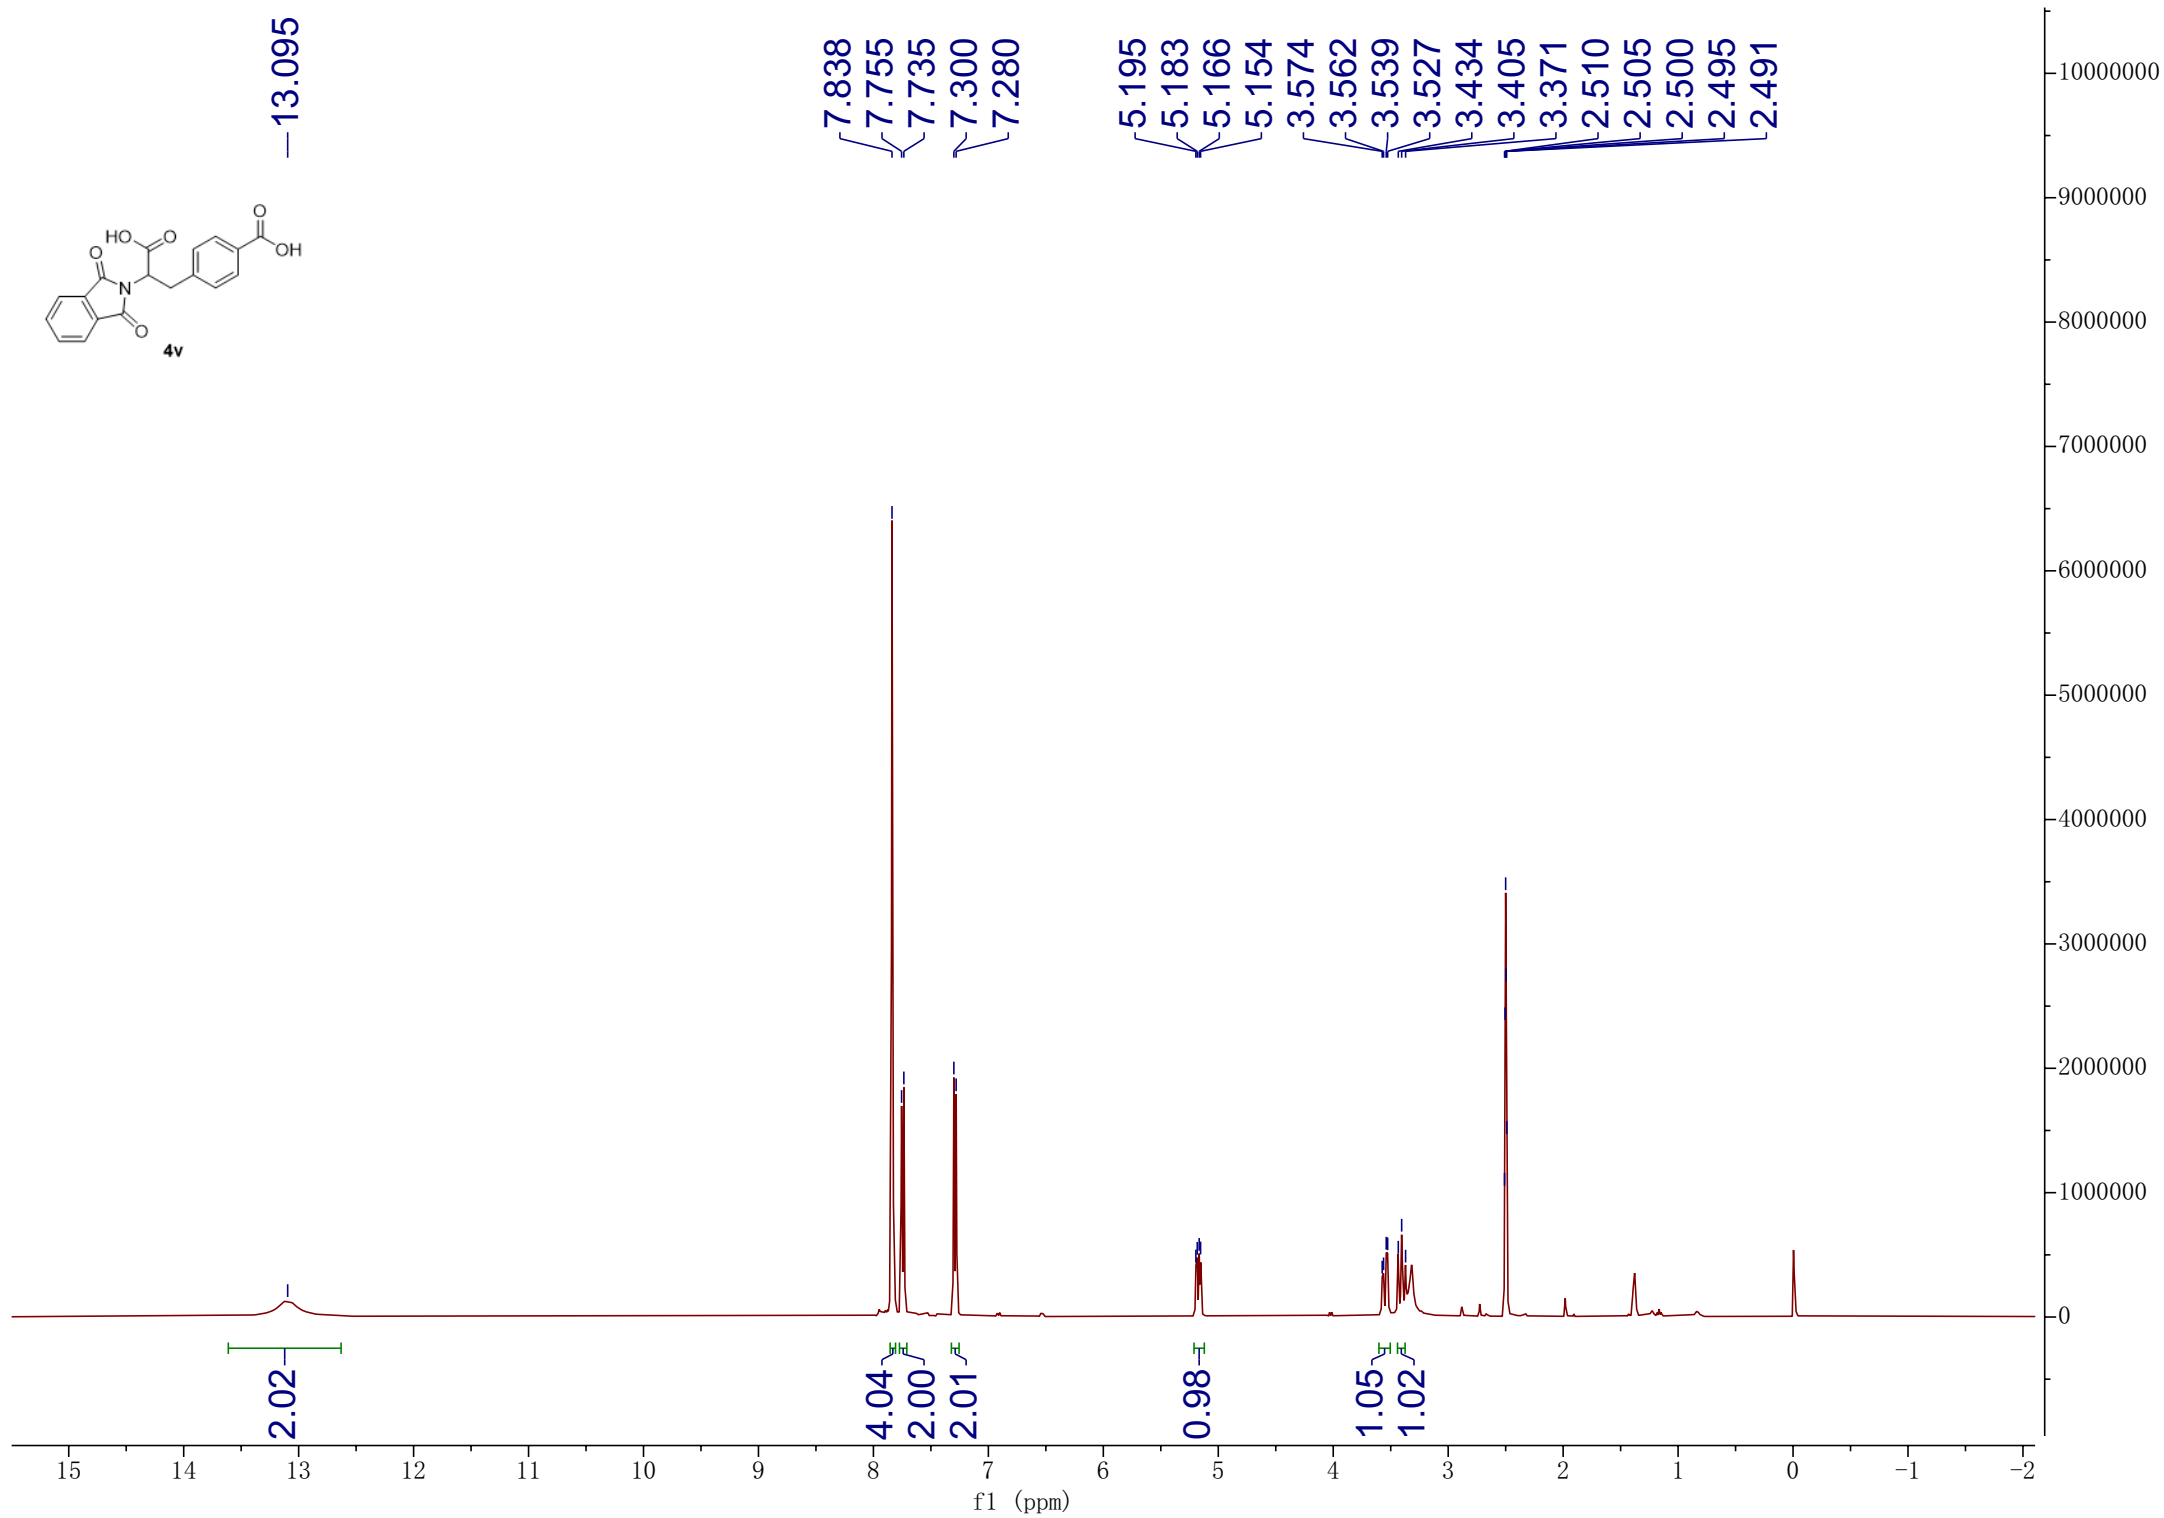

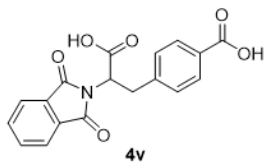

169.88  
167.10  
167.08

142.67  
134.96  
130.69  
129.36  
129.15  
129.03  
123.45

52.63  
40.15  
39.94  
39.73  
39.52  
39.31  
39.10  
38.89  
34.03

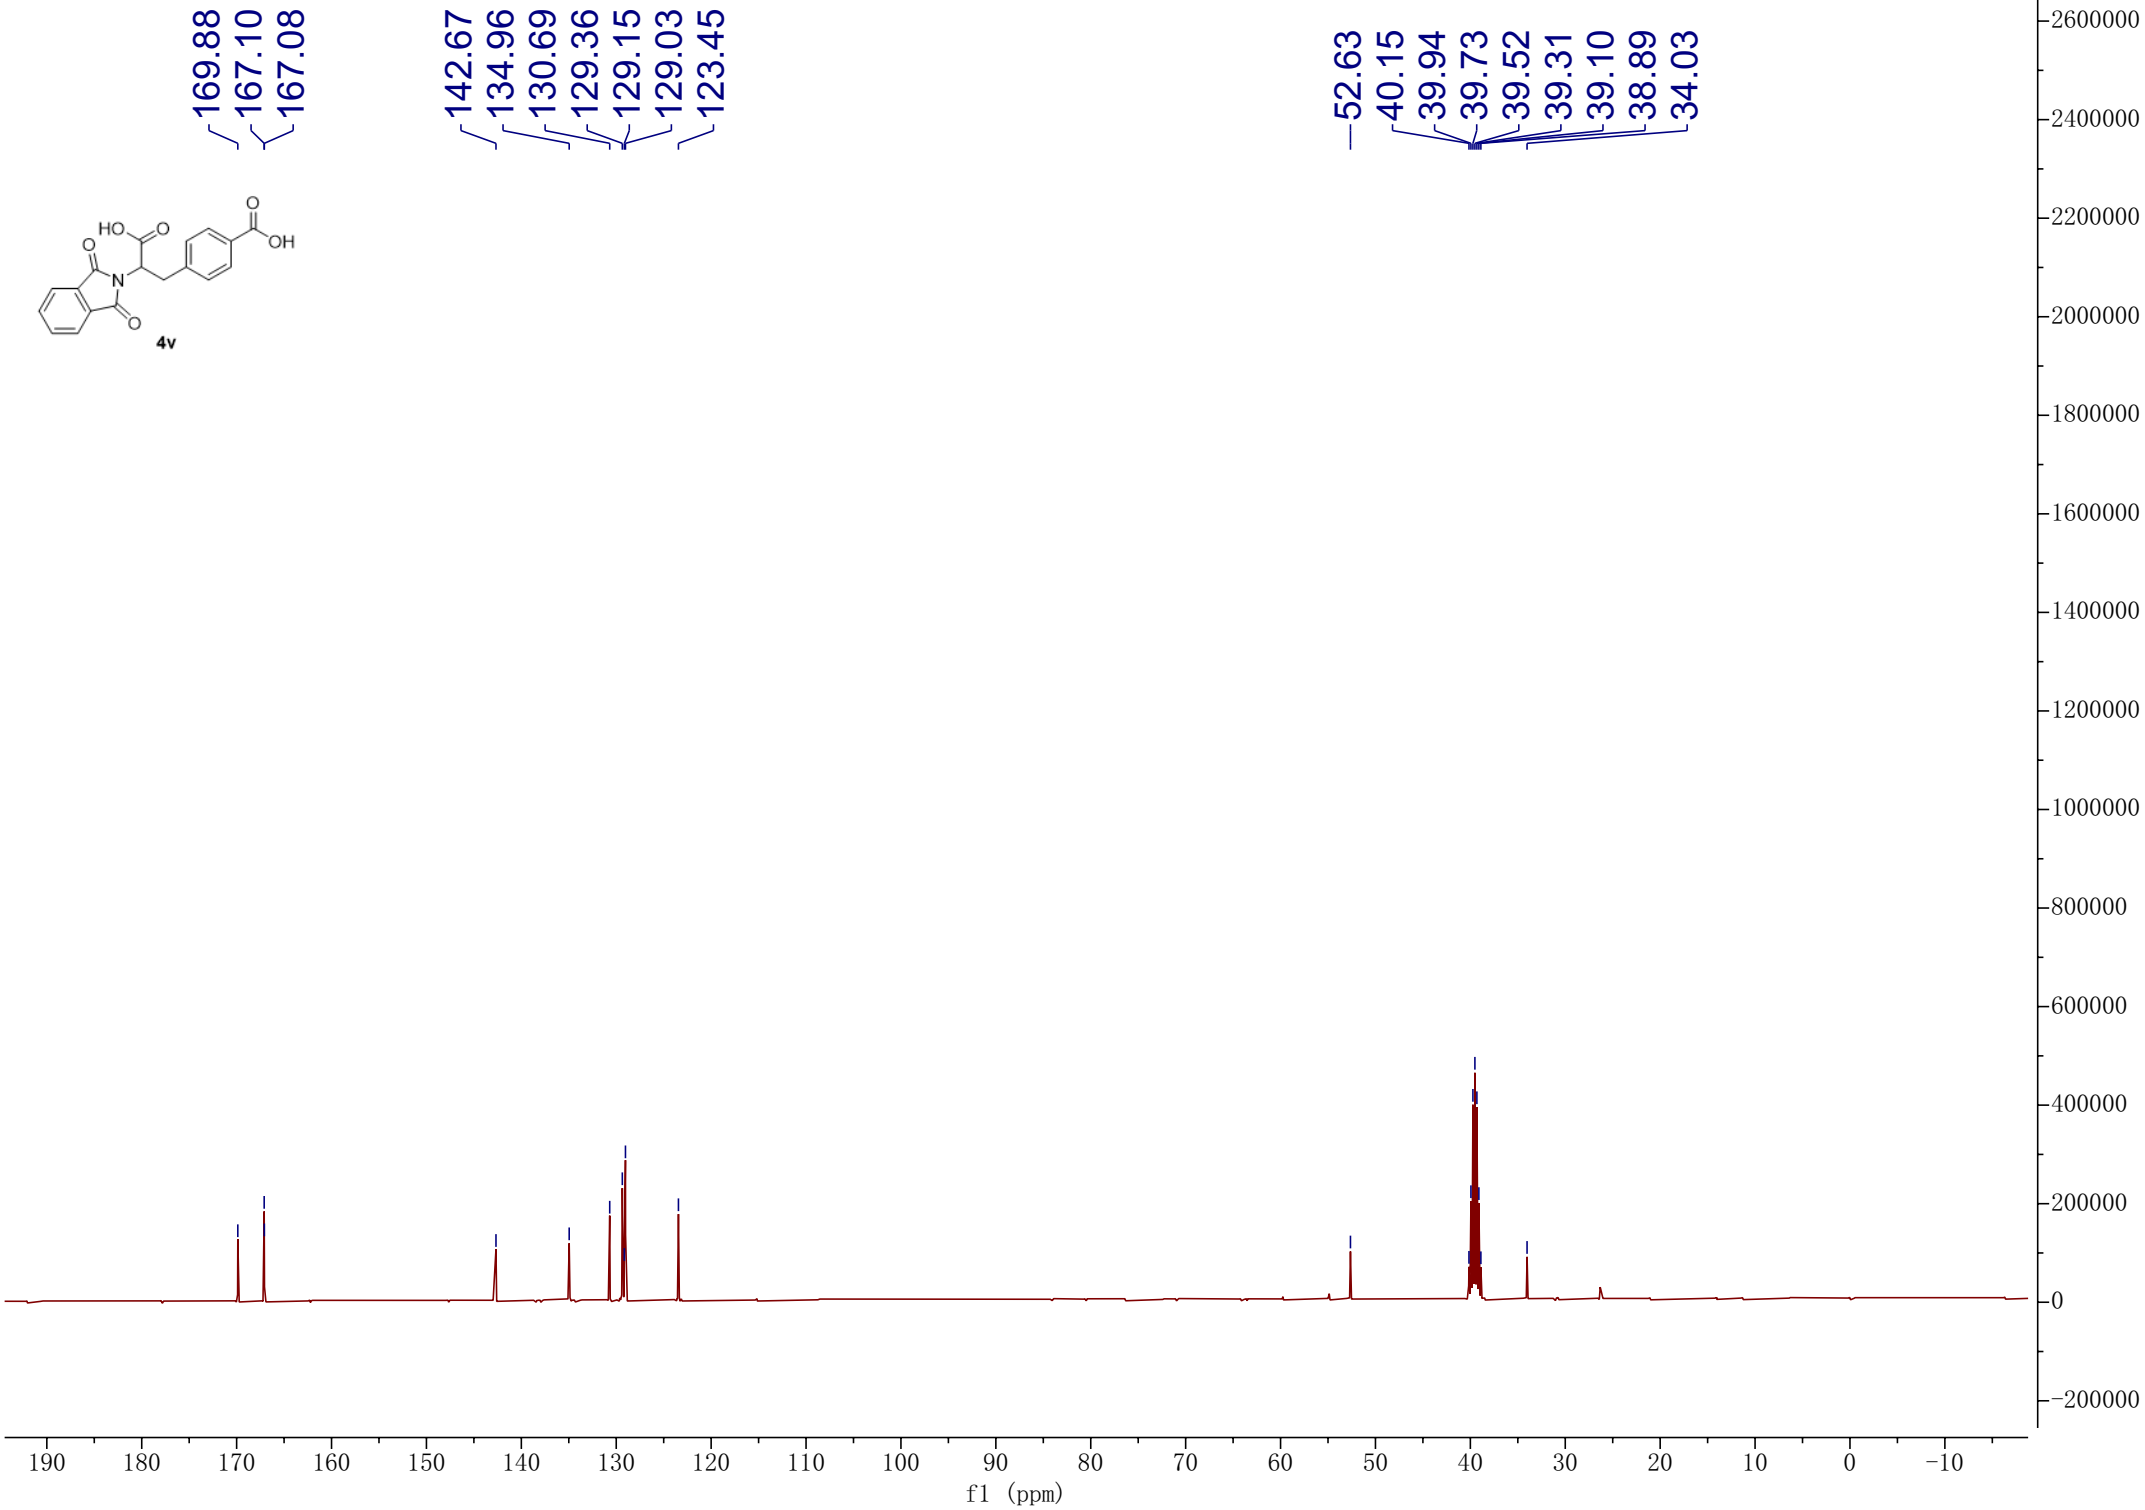

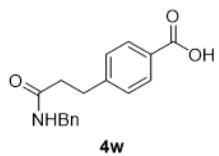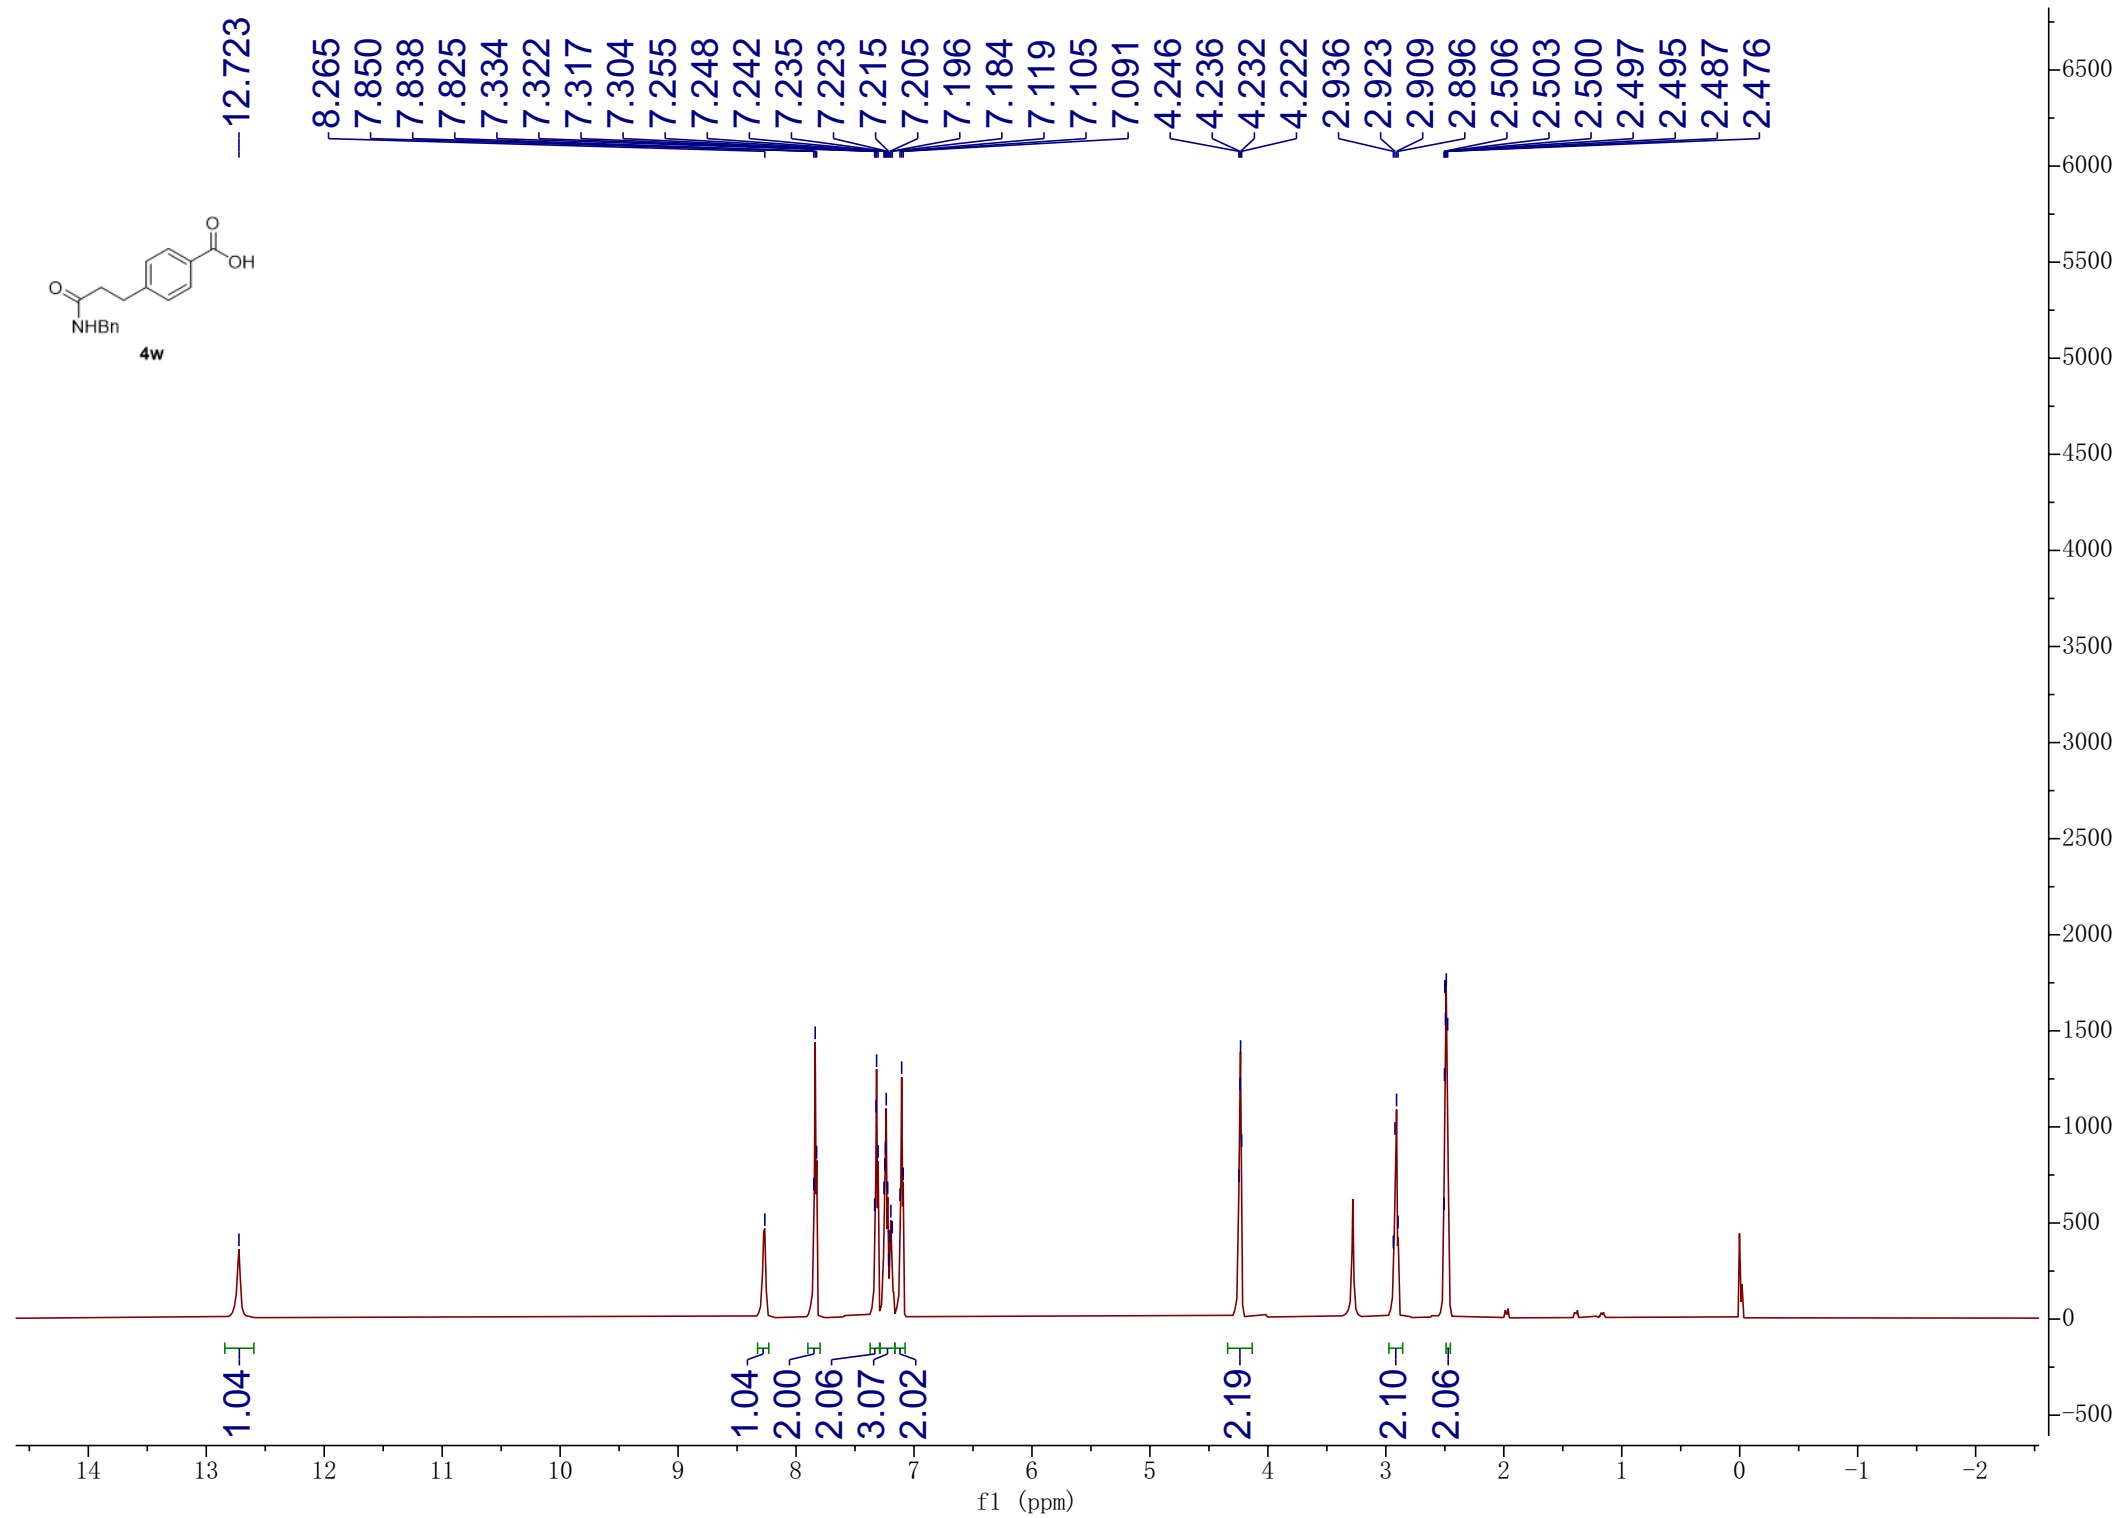

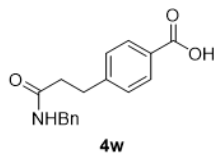

170.90  
167.18

146.53  
139.39  
129.25  
128.49  
128.45  
128.05  
127.03  
126.55

41.91  
39.93  
39.80  
39.66  
39.52  
39.38  
39.24  
39.10  
36.36  
30.94

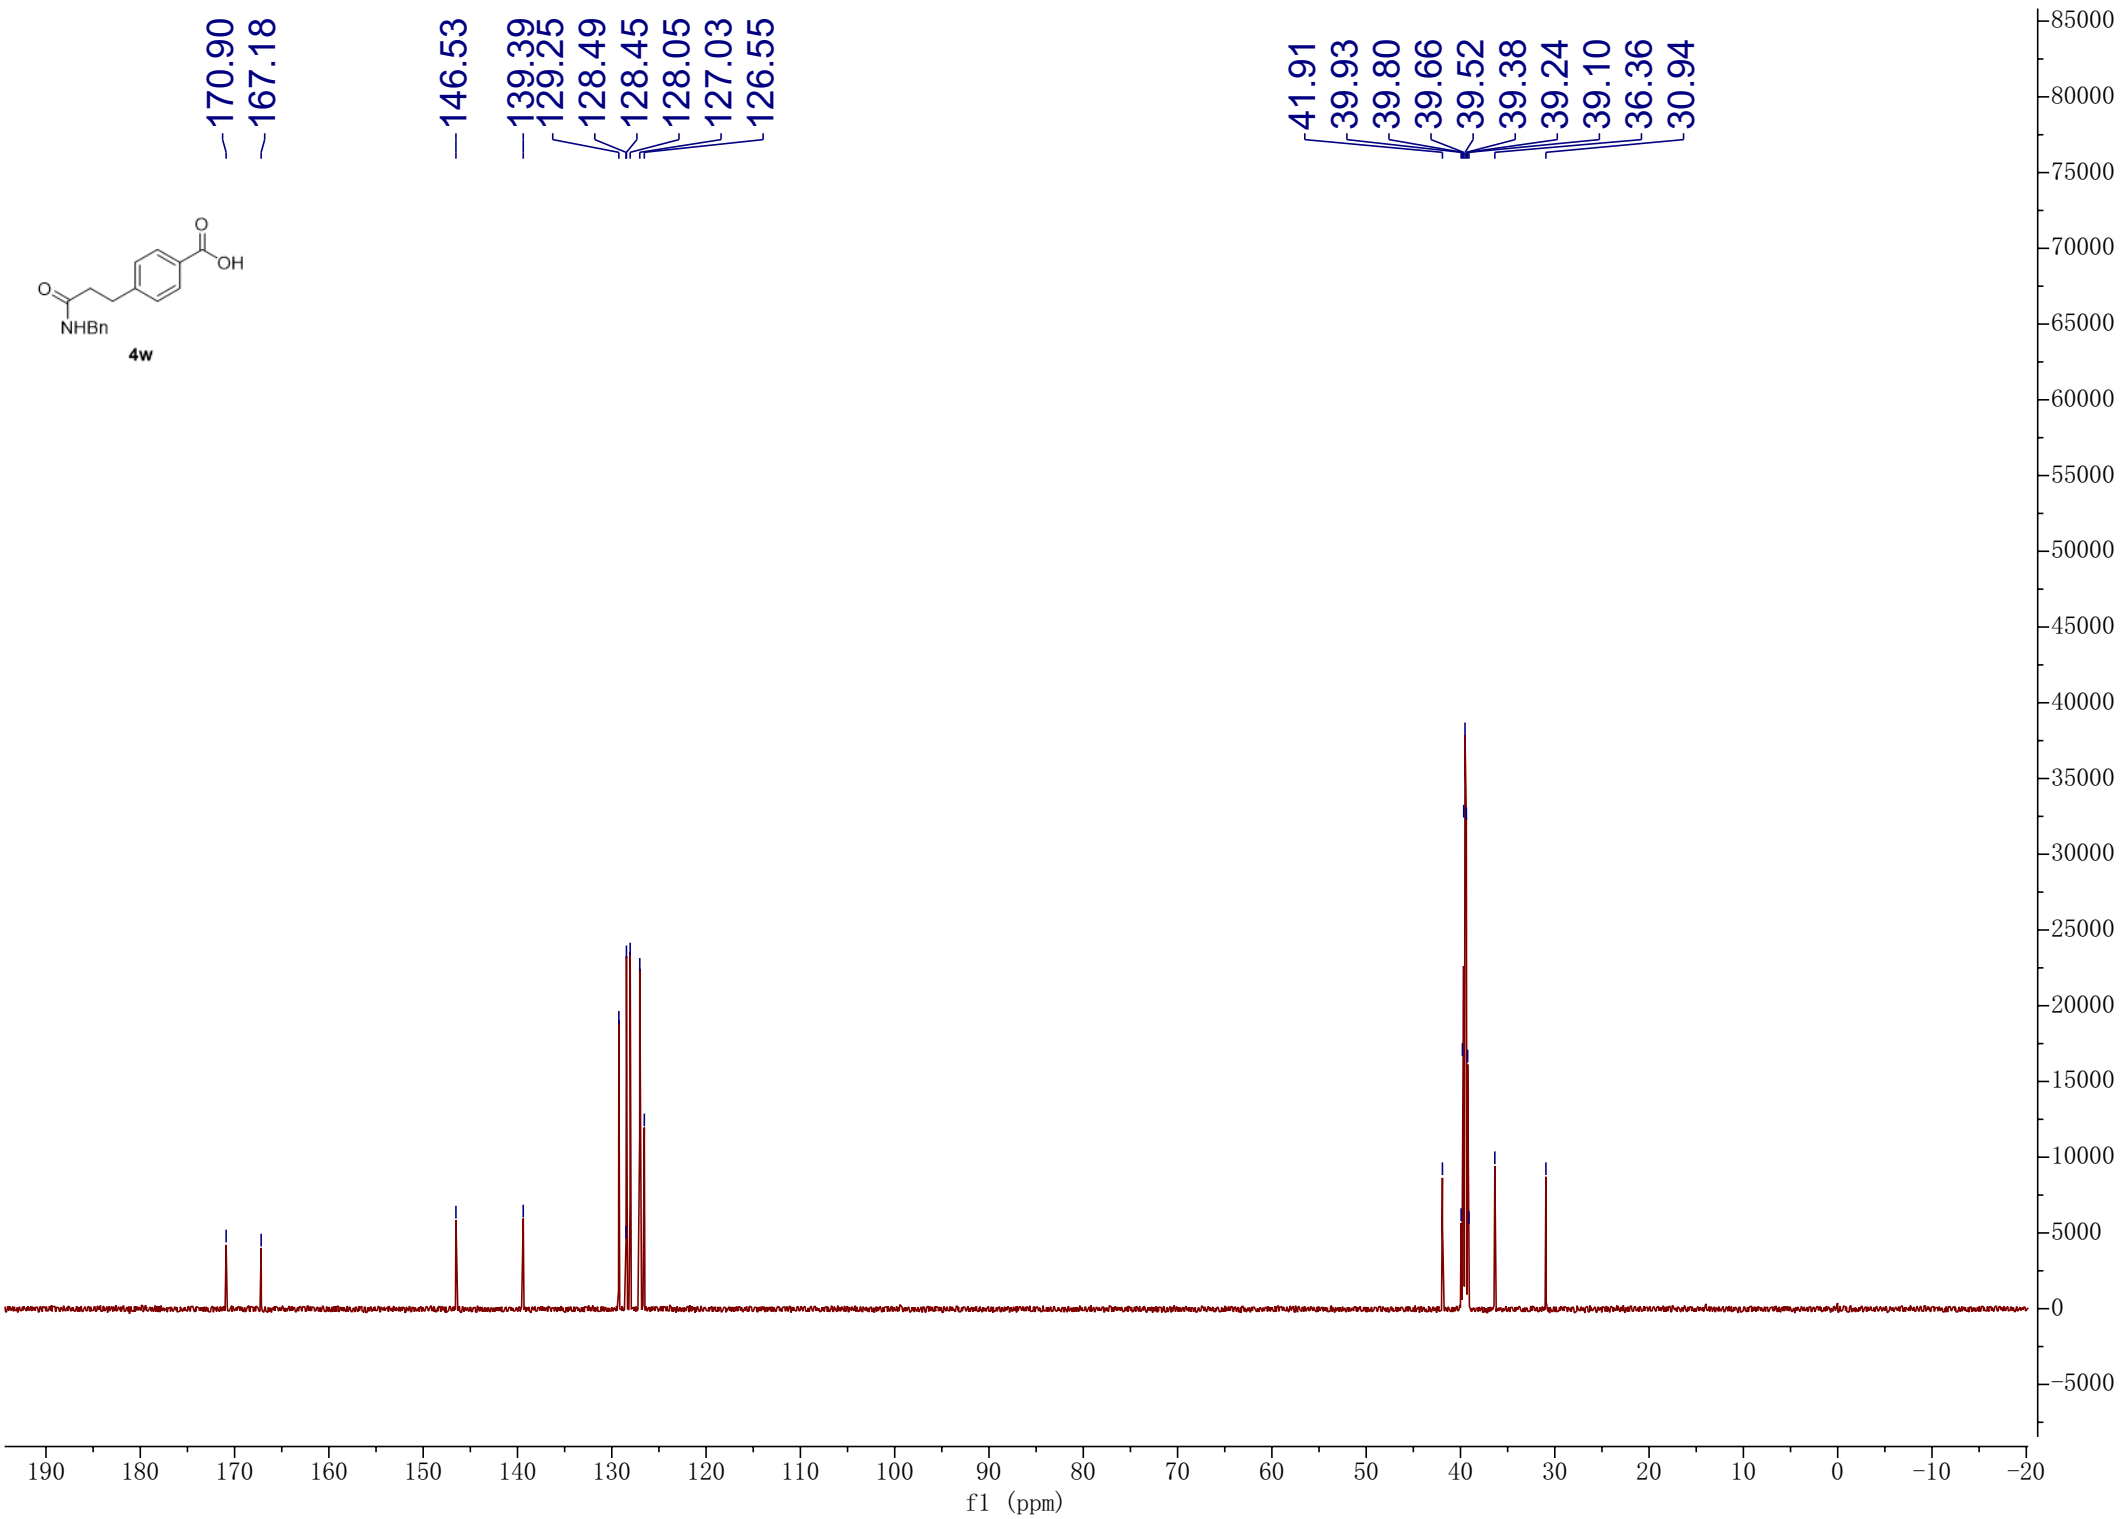

Supplement: d3qo00183k1.pdf [file d3qo00183k1.pdf]
